# Supplementary material for: A Centenarian Single Nucleotide Polymorphism in collagen gene COL25A1 promotes longevity in C. elegans
Source: Research Square preprint supplement (doi:10.21203/rs.3.rs-6035585/v1), 2025-04-29
Supplement: Supplementary file 1 [file 1c3cb60e4454c2b5f9686d35.xlsx]

## Sheet: Lifespan summary
Experiment Number	Genotype/Perturbation	No. of worms	Mean lifespan (days)	Std. error	% Chg wrt WT	% Chg wrt respective control i.e. col-99(gk694263[S106L]) or CED04/05/06	Adj. p-value	Adj. p-value wrt respective control i.e. col-99(gk694263[S106L]) or CED04/05/06
1	WT (Figure 1B)	158	23.1	0.4
	col-99(ok1204)	201	18.4	0.2	-20.34		p<0.0001
	GFP::COL-99, pha-1(+) overexpression	87	23.3	0.4	0.8658		p<0.0001
1	WT (Figure 2A)	101	16.74	0.36
	col-99(gk694263[S106L]) SNP mutant	135	21.08	0.27	25.925		p<0.0001
1	WT (Figure 2B)	272	17.29	0.24
	CED06 col-99(syb4332[COL-99EXT])	274	19.19	0.25	10.989		p<0.0001
2	WT	367	19.49	0.16
	CED06 col-99(syb4332[COL-99EXT])	396	21.78	0.22	11.7496		p<0.0001
3	WT	311	17.05	0.12
	CED06 col-99(syb4332[COL-99EXT])	258	18.31	0.23	7.39003		p<0.0001
4	WT	416	18.23	0.14
	CED06 col-99(syb4332[COL-99EXT])	399	22.37	0.25	22.7098		p<0.0001
1	WT (Figure S1 B)	170	16.18	0.15
	col-99(gk694263[S106L]) SNP mutant 4X	127	21.91	0.37	35.4141		p<0.0001
	col-99(gk694263[S106L]) SNP mutant 8X	125	18.9	0.44	16.8109		p<0.0001
	col-99(gk694263[S106L]) SNP mutant 10X	124	22.79	0.49	40.8529		p<0.0001
2	WT	169	15.59	0.3
	col-99(gk694263[S106L]) SNP mutant 4X	199	21.5	0.4	37.9089		p<0.0001
	col-99(gk694263[S106L]) SNP mutant 8X	252	16.52	0.34	5.96536		0.0141
	col-99(gk694263[S106L]) SNP mutant 10X	240	25.66	0.36	64.5927		p<0.0001
1	WT (Figure S1 C)	272	17.29	0.24
	CED04 col-99(syb4350[S106L])	224	20	0.22	15.6738		p<0.0001
2	WT	311	17.05	0.12
	CED04 col-99(syb4350[S106L])	248	18.27	0.13	7.15543		p<0.0001
3	WT	291	23.02	0.24
	CED04 col-99(syb4350[S106L])	265	25.79	0.29	12.033		p<0.0001
4	WT	416	18.23	0.14
	CED04 col-99(syb4350[S106L])	524	20.77	0.17	13.9331		p<0.0001
1	WT (Figure 3B)	199	20.17	0.27
	CED05 col-99(syb4352[S106D])	154	21.17	0.35	4.95786		0.0155
2	WT	112	18.53	0.29
	CED05 col-99(syb4352[S106D])	247	18.28	0.21	-1.34916		0.5501
3	WT	367	19.49	0.16
	CED05 col-99(syb4352[S106D])	256	20.12	0.17	3.23243		0.0308
4	WT	311	17.05	0.12
	CED05 col-99(syb4352[S106D])	264	17.04	0.15	-0.058651		0.9415
5	WT	291	23.02	0.24
	CED05 col-99(syb4352[S106D])	259	21.33	0.29	-7.34144		3e-05
1	WT (Figure S2 B)	168	19.66	0.22
	col-99(gk694263[S106L]) SNP mutant	153	24.88	0.33	26.5514		p<0.0001
	atf-7(gk715); col-99(gk694263[S106L]) SNP	144	22.91	0.55	16.531	-7.91801	p<0.0001	0.1682
	atf-7(gk715)	167	19.51	0.57	-0.76297		0.2998
2	WT	112	18.53	0.29
	col-99(gk694263[S106L]) SNP mutant	136	20.96	0.29	13.1139		p<0.0001
	atf-7(gk715); col-99(gk694263[S106L]) SNP	148	21.78	0.38	17.5391	3.91221	p<0.0001	0.0022
	atf-7(gk715)	257	14.4	0.23	-22.2882		p<0.0001
3	WT	311	17.05	0.12
	col-99(gk694263[S106L]) SNP mutant	309	18.74	0.21	9.91202		p<0.0001
	atf-7(gk715); col-99(gk694263[S106L]) SNP	246	24.85	0.4	45.7478	32.6041	p<0.0001	p<0.0001
	atf-7(gk715)	244	21.04	0.37	23.4018		p<0.0001
4	WT	416	18.23	0.14
	col-99(gk694263[S106L]) SNP mutant	383	20.19	0.24	10.7515		p<0.0001
	atf-7(gk715); col-99(gk694263[S106L]) SNP	510	22.26	0.33	22.1064	10.2526	p<0.0001	p<0.0001
	atf-7(gk715)	473	17.4	0.28	-4.55293		0.0005
1	WT (Figure S2 D)	168	19.66	0.22
	col-99(gk694263[S106L]) SNP mutant	153	24.88	0.33	26.5514		p<0.0001
	argk-1(ok2993); col-99(gk694263[S106L]) SNP	154	24.77	0.39	25.9919	-0.442122	p<0.0001	0.6401
	argk-1(ok2993)	163	19.79	0.29	0.661241		0.3886
2	WT	199	20.17	0.27
	col-99(gk694263[S106L]) SNP mutant	124	23.48	0.39	16.4105		p<0.0001
	argk-1(ok2993); col-99(gk694263[S106L]) SNP	241	25.95	0.31	28.6564	10.5196	p<0.0001	p<0.0001
	argk-1(ok2993)	249	19.47	0.25	-3.4705		0.0464
3	WT	272	17.29	0.24
	col-99(gk694263[S106L]) SNP mutant	225	19.62	0.23	13.476		p<0.0001
	argk-1(ok2993); col-99(gk694263[S106L]) SNP	151	22.37	0.4	29.3811	14.0163	p<0.0001	p<0.0001
	argk-1(ok2993)	195	18.53	0.28	7.17178		0.0021
4	WT	311	17.05	0.12
	col-99(gk694263[S106L]) SNP mutant	309	18.74	0.21	9.91202		p<0.001
	argk-1(ok2993); col-99(gk694263[S106L]) SNP	318	18.18	0.21	6.62757	-2.98826	p<0.0001	0.0925
	argk-1(ok2993)	385	16.65	0.1	-2.34604		0.0488
5	WT	291	23.02	0.24
	col-99(gk694263[S106L]) SNP mutant	238	25.18	0.31	9.38315		p<0.0001
	argk-1(ok2993); col-99(gk694263[S106L]) SNP	232	27.74	0.36	20.5039	10.1668	p<0.0001	p<0.0001
	argk-1(ok2993)	113	19.03	0.52	-17.3328		p<0.0001
1	WT (Figure S3 A)	170	16.18	0.15
	col-99(gk694263[S106L]) SNP mutant	124	22.79	0.49	40.8529		p<0.0001
	ddr-1(ok874); ddr-2(ok574)	156	15.42	0.26	-4.69716		0.5761
	col-99(gk694263[S106L]); ddr-1(ok874); ddr-2(ok574)	182	22.63	0.37	39.864	-0.702062	p<0.0001	0.468
	col-99(gk694263[S106L]); ddr-1(ok874)	144	22.61	0.48	39.7404		p<0.0001
	col-99(gk694263[S106L]); ddr-2(ok574)	171	27.67	0.5	71.0136		p<0.0001
2	WT	169	15.59	0.3
	col-99(gk694263[S106L]) SNP mutant	240	25.66	0.36	64.5927		p<0.0001
	ddr-1(ok874); ddr-2(ok574)	152	20.65	0.42	32.4567		p<0.0001
	col-99(gk694263[S106L]); ddr-1(ok874); ddr-2(ok574)	172	22.52	0.5	44.4516	-12.2369	p<0.0001	2.2e-05
	col-99(gk694263[S106L]); ddr-1(ok874)	156	19.59	0.67	25.6575		p<0.0001
	col-99(gk694263[S106L]); ddr-2(ok574)	157	25.38	0.41	62.7967		p<0.0001
3	WT	209	16.04	0.21
	col-99(gk694263[S106L]) SNP mutant	205	23.52	0.41	46.6334		p<0.0001
	ddr-1(ok874); ddr-2(ok574)	190	18.22	0.37	13.591		p<0.0001
	col-99(gk694263[S106L]); ddr-1(ok874); ddr-2(ok574)	107	24.48	0.65	52.6185	4.08163	p<0.0001	0.0494
	col-99(gk694263[S106L]); ddr-1(ok874)	168	22.11	0.57	37.8429		p<0.0001
	col-99(gk694263[S106L]); ddr-2(ok574)	188	26.9	0.41	67.7057		p<0.0001
1	WT (L4440) (Figure 5A)	393	20.76	0.22
	WT (tir-1 RNAi)	315	19	0.16	-8.47784		p<0.0001
	col-99(gk694263[S106L]) SNP mutant (L4440)	149	24.42	0.29	17.6301		p<0.0001
	col-99(gk694263[S106L]) SNP mutant (tir-1 RNAi)	364	18.85	0.15	-9.20039	-22.8092	p<0.0001	p<0.0001
2	WT (L4440)	292	17.69	0.17
	WT (tir-1 RNAi)	222	16.66	0.13	-5.8225		p<0.0001
	col-99(gk694263[S106L]) SNP mutant (L4440)	112	20.48	0.25	15.7716		p<0.0001
	col-99(gk694263[S106L]) SNP mutant (tir-1 RNAi)	120	15.68	0.21	-11.3624	-23.4375	p<0.0001	p<0.0001
3	WT (L4440)	252	18.46	0.2
	WT (tir-1 RNAi)	260	16.39	0.14	-11.2134		p<0.0001
	col-99(gk694263[S106L]) SNP mutant (L4440)	170	24.81	0.22	34.3987		p<0.0001
	col-99(gk694263[S106L]) SNP mutant (tir-1 RNAi)	173	19.51	0.26	5.68797	-21.3624	0.0014	p<0.0001
4	WT (L4440)	227	20.76	0.26
	WT (tir-1 RNAi)	192	16.03	0.14	-22.7842		p<0.0001
	col-99(gk694263[S106L]) SNP mutant (L4440)	238	24.6	0.26	18.4971		p<0.0001
	col-99(gk694263[S106L]) SNP mutant (tir-1 RNAi)	210	16.07	0.14	-22.5915	-34.6748	p<0.0001	p<0.0001
1	WT (L4440) (Figure 5B)	393	20.76	0.22
	WT (pmk-1 RNAi)	392	18.82	0.16	-9.34489		p<0.0001
	col-99(gk694263[S106L]) SNP mutant (L4440)	149	24.42	0.29	17.6301		p<0.0001
	col-99(gk694263[S106L]) SNP mutant (pmk-1 RNAi)	308	20.16	0.21	-2.89017	-17.4447	0.1039	p<0.0001
2	WT (L4440)	292	17.69	0.17
	WT (pmk-1 RNAi)	264	15.88	0.13	-10.2318		p<0.0001
	col-99(gk694263[S106L]) SNP mutant (L4440)	112	20.48	0.25	15.7716		p<0.0001	p<0.0001
	col-99(gk694263[S106L]) SNP mutant (pmk-1 RNAi)	124	17.18	0.32	-2.88298	-16.1133	0.5741
3	WT (L4440)	252	18.46	0.2
	WT (pmk-1 RNAi)	273	16.5	0.13	-10.6176		p<0.0001
	col-99(gk694263[S106L]) SNP mutant (L4440)	170	24.81	0.22	34.3987		p<0.0001
	col-99(gk694263[S106L]) SNP mutant (pmk-1 RNAi)	197	19.94	0.24	8.01733	-19.6292	p<0.0001	p<0.0001
4	WT (L4440)	227	20.76	0.26
	WT (pmk-1 RNAi)	151	16.65	0.19	-19.7977		p<0.0001
	col-99(gk694263[S106L]) SNP mutant (L4440)	238	24.6	0.26	18.4971		p<0.0001
	col-99(gk694263[S106L]) SNP mutant (pmk-1 RNAi)	222	16.51	0.12	-20.4721	-32.8862	p<0.0001	p<0.0001
1	WT (L4440) (Figure S3 B)	292	17.69	0.17
	WT (tir-1 RNAi)	222	16.66	0.13	-5.8225		p<0.0001
	CED04 col-99(syb4350[S106L]) (L4440)	154	19.67	0.29	11.1928		p<0.0001
	CED04 col-99(syb4350[S106L]) (tir-1 RNAi)	178	16.02	0.15	-9.44036	-18.5562	p<0.0001	p<0.0001
2	WT (L4440)	227	20.76	0.26
	WT (tir-1 RNAi)	192	16.03	0.14	-22.7842		p<0.0001
	CED04 col-99(syb4350[S106L]) (L4440)	157	23.23	0.31	11.8979		p<0.0001
	CED04 col-99(syb4350[S106L]) (tir-1 RNAi)	203	16.31	0.16	-21.4355	-29.7891	p<0.0001	p<0.0001
1	WT (L4440) (Figure S3 C)	292	17.69	0.17
	WT (pmk-1 RNAi)	264	15.88	0.13	-10.2318		p<0.0001
	CED04 col-99(syb4350[S106L]) (L4440)	154	19.67	0.29	11.1928		p<0.0001
	CED04 col-99(syb4350[S106L]) (pmk-1 RNAi)	190	15.38	0.13	-13.0582	-21.8099	p<0.0001	p<0.0001
2	WT (L4440)	227	20.76	0.26
	WT (pmk-1 RNAi)	151	16.65	0.19	-19.7977		p<0.0001
	CED04 col-99(syb4350[S106L]) (L4440)	157	23.23	0.31	11.8979		p<0.0001
	CED04 col-99(syb4350[S106L]) (pmk-1 RNAi)	200	15.84	0.2	-23.6994	-31.8123	p<0.0001	p<0.0001
1	WT (L4440) (Figure S3 D)	292	17.69	0.17
	WT (tir-1 RNAi)	222	16.66	0.13	-5.8225		p<0.0001
	CED05 col-99(syb4352[S106D]) (L4440)	266	17.08	0.16	-3.44828		0.0138
	CED05 col-99(syb4352[S106D]) (tir-1 RNAi)	154	15.79	0.11	-10.7405	-7.55269	p<0.0001	p<0.0001
2	WT (L4440)	227	20.76	0.26
	WT (tir-1 RNAi)	192	16.03	0.14	-22.7842		p<0.0001
	CED05 col-99(syb4352[S106D]) (L4440)	270	20.63	0.24	-0.626204		0.6924
	CED05 col-99(syb4352[S106D]) (tir-1 RNAi)	143	15.74	0.16	-24.1811	-23.7033	p<0.0001	p<0.0001
1	WT (L4440) (Figure S3 E)	292	17.69	0.17
	WT (pmk-1 RNAi)	264	15.88	0.13	-10.2318		p<0.0001
	CED05 col-99(syb4352[S106D]) (L4440)	266	17.08	0.16	-3.44828		p<0.0001
	CED05 col-99(syb4352[S106D]) (pmk-1 RNAi)	188	16.33	0.15	-7.68796	-4.3911	p<0.0001	0.0007
2	WT (L4440)	227	20.76	0.26
	WT (pmk-1 RNAi)	151	16.65	0.19	-19.7977		p<0.0001
	CED05 col-99(syb4352[S106D]) (L4440)	270	20.63	0.24	-0.626204		0.6924
	CED05 col-99(syb4352[S106D]) (pmk-1 RNAi)	239	15.31	0.13	-26.2524	-25.7877	p<0.0001	p<0.0001
1	WT (L4440) (Figure 5C)	292	17.69	0.17
	WT (tir-1 RNAi)	222	16.66	0.13	-5.8225		p<0.0001
	CED06 col-99(syb4332[COL-99EXT]) (L4440)	169	20.4	0.36	15.3194		p<0.0001
	CED06 col-99(syb4332[COL-99EXT]) (tir-1 RNAi)	174	16.01	0.16	-9.49689	-21.5196	p<0.0001	p<0.0001
2	WT (L4440)	205	21.24	0.23
	WT (tir-1 RNAi)	127	19.71	0.26	-7.20339		p<0.0001
	CED06 col-99(syb4332[COL-99EXT]) (L4440)	215	22.83	0.22	7.48588		p<0.0001
	CED06 col-99(syb4332[COL-99EXT]) (tir-1 RNAi)	66	18.77	0.37	-11.629	-17.7836	p<0.0001	p<0.0001
1	WT (L4440) (Figure 5D)	292	17.69	0.17
	WT (pmk-1 RNAi)	264	15.88	0.13	-10.2318		p<0.0001
	CED06 col-99(syb4332[COL-99EXT]) (L4440)	169	20.4	0.36	15.3194		p<0.0001
	CED06 col-99(syb4332[COL-99EXT]) (pmk-1 RNAi)	199	16.09	0.16	-9.04466	-21.1275	p<0.0001	p<0.0001
2	WT (L4440)	205	21.24	0.23
	WT (pmk-1 RNAi)	159	20.49	0.26	-3.53107		0.0135
	CED06 col-99(syb4332[COL-99EXT]) (L4440)	215	22.83	0.22	7.48588		p<0.0001
	CED06 col-99(syb4332[COL-99EXT]) (pmk-1 RNAi)	243	19.42	0.15	-8.56874	-14.9365	p<0.0001	p<0.0001
1	WT (Figure 5F)	311	17.05	0.12
	col-99(gk694263[S106L]) SNP mutant	309	18.74	0.21	9.91202		p<0.0001
	yap-1(tm1416); col-99(gk694263[S106L]) SNP mutant	416	14.51	0.23	-14.8974	-22.572	p<0.0001	p<0.0001
	yap-1(tm1416)	261	14.64	0.2	-14.1349		p<0.0001
2	WT	416	18.23	0.14
	col-99(gk694263[S106L]) SNP mutant	383	20.19	0.24	10.7515		p<0.0001
	yap-1(tm1416); col-99(gk694263[S106L]) SNP mutant	655	13.52	0.15	-25.8365	-33.0362	p<0.0001	p<0.0001
	yap-1(tm1416)	608	14.74	0.14	-19.1443		p<0.0001

## Sheet: Development assay_Fig S1D
	WT		col-99(gk694263[S106L]) SNP
Stages	#animals (Plate 1)	#animals (Plate 2)	#animals (Plate 1)	#animals (Plate 2)
L3	4	1	3	2
Early L4	7	3	3	8
L4	31	42	60	73
Late L4	11	32	1	5
Early YA	47	37	4	7
Late YA	2	1	1	1

## Sheet: Oxidative Stress Assay_Fig S1E
Note: col-99(SNP) is col-99(gk694263[S106L])																		TRIAL #1
																		DATE:	12/16/2020 6:58:59 PM
																		FILE:	C:\wmicrotracker\p00033\20201214_1657
																		SUBPROJECT:	20201214_col99snp8x_YA
																		<<<<<< Group Activity: Average Activity Counts per Data Interval>>>>>>
																		Group/Time[m]	30	60	90	120	150	180	210	240	270	300	330	360	390	420	450	480	510	540	570	600	630	660	690	720	750	780	810	840	870	900	930
																		000_Free	0	0	0	0	0	0	0	0	0	0	0	0	0	0	0	0	0	0	0	0	0	0	0	0	0	0	0	0	0	0	0
																		<<<<<< Group Activity: Standard Error >>>>>>
																		Group/Time[m]	30	60	90	120	150	180	210	240	270	300	330	360	390	420	450	480	510	540	570	600	630	660	690	720	750	780	810	840	870	900	930
																		000_Free	0	0	0	0	0	0	0	0	0	0	0	0	0	0	0	0	0	0	0	0	0	0	0	0	0	0	0	0	0	0	0
																		<<<<<< Group Activity: Number of wells/group >>>>>>
																		Group/Time[m]	30	60	90	120	150	180	210	240	270	300	330	360	390	420	450	480	510	540	570	600	630	660	690	720	750	780	810	840	870	900	930
																		000_Free	0	0	0	0	0	0	0	0	0	0	0	0	0	0	0	0	0	0	0	0	0	0	0	0	0	0	0	0	0	0	0
																		<<<<<< Number of Samples per Acquisition Interval [1unit=500values] >>>>>>
																		Time[m]	30	60	90	120	150	180	210	240	270	300	330	360	390	420	450	480	510	540	570	600	630	660	690	720	750	780	810	840	870	900	930
																		#Samples	30	30	30	30	30	30	30	30	30	30	30	30	30	30	30	30	30	30	30	30	30	30	30	30	30	30	30	30	30	30	30
																		<<<<<< Average Temperature [°C] >>>>>>
																		Time[m]	30	60	90	120	150	180	210	240	270	300	330	360	390	420	450	480	510	540	570	600	630	660	690	720	750	780	810	840	870	900	930
																		Temp[°C]	27.2	27.2	27.2	27.2	27.2	27.2	26.9	26.9	26.9	26.9	26.9	26.7	26.7	26.7	26.7	26.7	26.7	26.7	26.7	26.7	26.7	26.7	26.7	26.7	26.7	26.7	26.5	26.5	26.7	26.5	26.7
																		<<<<<< Well Activity >>>>>>
																		Well	Group/Time[m]	30	60	90	120	150	180	210	240	270	300	330	360	390	420	450	480	510	540	570	600	630	660	690	720	750	780	810	840	870	900
																		A1	999_Free	260	246	237	221	223	195	192	153	147	199	178	196	212	214	192	204	189	186	201	198	204	204	188	208	208	170	180	178	207	210
																		B1	999_Free	267	233	216	223	202	218	238	223	242	225	221	217	236	235	224	220	238	220	228	214	209	234	242	218	214	236	214	221	242	238
																		C1	999_Free	165	215	243	252	259	237	223	206	203	203	209	214	226	206	186	175	163	194	158	153	153	177	170	156	161	165	192	182	151	167
																		D1	999_Free	163	244	263	260	238	243	216	216	197	205	207	215	186	204	189	191	187	186	203	162	183	173	156	162	154	149	133	148	113	117
																		E1	999_Free	156	158	208	259	247	248	232	212	218	192	208	173	241	206	235	185	176	174	186	167	114	118	102	107	115	108	128	76	116	64
																		F1	999_Free	307	186	216	248	258	239	215	201	192	185	212	223	192	199	177	187	168	164	124	117	162	142	126	101	113	68	78	75	78	88
																		G1	999_Free	270	252	251	269	276	263	247	259	228	234	240	228	237	250	235	223	230	212	217	200	193	169	150	179	179	145	142	109	86	120
																		H1	999_Free	176	189	222	229	234	210	187	189	172	156	142	181	159	146	162	128	111	81	126	91	91	73	81	162	72	80	87	60	38	29
																		A2	999_Free	262	257	212	244	198	209	184	203	201	184	192	205	210	218	211	221	206	208	216	227	232	229	215	226	221	230	221	213	216	207
																		B2	999_Free	229	240	226	237	241	226	250	241	251	241	239	254	228	236	243	245	252	251	237	245	267	265	276	263	270	257	264	254	248	279
																		C2	999_Free	229	213	252	255	261	251	288	260	265	250	229	235	243	224	240	232	222	255	223	228	191	233	203	219	243	181	179	148	141	162
																		D2	999_Free	289	277	283	293	288	270	282	273	283	260	264	273	255	247	258	268	257	261	246	238	217	230	240	204	203	209	209	219	187	215
																		E2	999_Free	230	234	253	280	276	278	266	275	263	271	255	239	245	248	260	264	237	232	236	226	259	227	202	214	200	208	183	188	189	200
																		F2	999_Free	244	197	263	276	262	277	265	260	244	263	231	238	239	250	228	224	222	204	223	187	186	157	188	167	192	184	143	152	141	140
																		G2	999_Free	130	205	246	255	261	260	266	246	247	239	232	243	247	222	240	220	220	223	225	224	213	243	196	189	184	216	205	194	156	119
																		H2	999_Free	248	207	230	252	275	249	253	234	223	236	242	220	222	215	202	205	222	221	206	215	216	181	199	163	164	157	151	176	175	147
																		A3	999_Free	227	220	219	202	218	217	200	184	187	202	223	198	224	208	205	217	191	218	209	207	203	230	221	211	228	226	232	229	238	224
																		B3	999_Free	1	0	0	0	0	0	0	0	0	0	0	0	0	0	0	0	0	0	0	0	0	0	0	0	0	0	0	0	0	0
																		C3	999_Free	1	0	0	0	0	0	0	0	0	0	0	0	0	0	0	0	0	0	0	0	0	0	0	0	0	0	0	0	0	0
																		D3	999_Free	225	289	285	279	299	311	282	289	296	304	278	284	278	276	263	255	255	259	267	257	256	270	252	242	213	226	209	225	207	179
																		E3	999_Free	291	311	265	288	303	295	288	298	291	271	299	267	293	274	272	293	245	273	251	247	220	199	207	206	216	191	206	216	200	203
																		F3	999_Free	291	301	300	300	284	285	291	282	273	290	287	285	283	283	280	284	259	262	255	231	219	242	251	233	222	211	217	200	216	240
																		G3	999_Free	258	260	266	268	295	293	282	269	281	287	277	259	261	270	292	272	266	262	250	246	252	239	242	251	220	235	261	227	211	233
																		H3	999_Free	113	190	245	262	248	264	258	255	258	260	259	253	246	243	241	258	231	238	245	236	234	216	212	168	173	142	155	180	217	190
																		A4	999_Free	207	209	230	234	206	236	241	225	251	216	241	242	247	237	242	255	234	221	244	247	255	253	244	246	235	217	263	250	253	242
																		B4	999_Free	216	215	218	206	228	222	226	220	236	237	234	239	193	224	237	224	212	218	237	207	209	204	235	224	204	196	237	235	222	217
																		C4	999_Free	326	206	235	232	227	214	192	177	151	178	169	153	160	164	151	147	119	73	70	71	106	68	59	57	62	78	46	55	30	27
																		D4	999_Free	244	225	275	265	254	208	192	160	162	138	134	148	171	143	152	136	111	112	93	66	87	71	53	60	56	71	62	41	23	26
																		E4	999_Free	269	198	229	266	232	202	188	168	158	143	162	174	164	168	163	124	123	114	95	78	80	59	68	65	45	58	56	60	34	43
																		F4	999_Free	199	190	245	278	258	232	222	211	185	170	158	174	189	184	195	191	153	145	138	124	124	107	69	63	54	59	39	61	46	60
																		G4	999_Free	295	208	264	252	245	246	211	210	180	173	193	186	180	187	168	194	153	96	128	118	94	104	100	78	99	58	58	88	58	77
																		H4	999_Free	268	253	252	254	232	224	182	126	151	147	132	119	140	131	133	115	106	80	78	69	69	51	54	54	33	37	35	26	41	23
																		A5	999_Free	156	146	191	195	190	176	195	185	193	207	201	177	196	211	184	174	206	205	208	196	183	195	189	209	215	197	199	207	211	227
																		B5	999_Free	281	285	299	274	270	282	294	297	283	289	270	269	244	255	274	269	257	263	268	262	275	254	287	269	263	261	269	258	275	257
																		C5	999_Free	251	252	255	271	271	274	245	246	249	209	225	203	186	217	198	187	185	192	168	148	125	152	188	135	151	152	141	156	112	117
																		D5	999_Free	249	261	278	284	276	280	274	260	279	264	257	235	245	257	251	254	239	230	225	189	175	216	232	201	186	163	202	170	158	163
																		E5	999_Free	246	251	277	282	258	260	279	261	256	225	238	232	252	229	227	225	254	235	194	201	213	202	214	211	163	174	179	143	183	167
																		F5	999_Free	183	216	231	260	244	242	236	236	207	175	196	188	208	213	168	167	142	160	133	116	148	112	134	97	153	116	115	109	104	121
																		G5	999_Free	274	243	273	288	256	261	246	239	209	239	193	195	183	193	214	199	187	174	165	128	146	104	105	137	104	101	121	123	100	113
																		H5	999_Free	250	235	235	255	253	241	217	203	193	192	169	168	181	175	186	122	142	102	105	107	96	85	105	105	102	118	107	95	48	62
																		A6	999_Free	277	267	274	284	290	322	295	309	292	304	304	293	307	306	280	286	304	299	285	289	280	275	283	285	269	277	279	283	285	262
																		B6	999_Free	1	0	0	0	0	0	0	0	0	0	0	0	0	0	0	1	0	1	1	0	0	1	0	0	0	0	0	0	0	0
																		C6	999_Free	1	0	0	0	0	0	0	0	0	0	0	0	0	0	0	0	0	0	0	0	0	0	0	0	0	0	0	0	0	0
																		D6	999_Free	283	294	311	297	312	292	284	284	310	291	279	295	273	270	248	253	258	247	268	240	235	217	221	224	227	228	209	217	215	185
																		E6	999_Free	274	297	319	327	311	301	302	297	283	295	278	280	284	301	262	243	254	252	253	243	260	219	243	257	221	209	194	161	130	153
																		F6	999_Free	278	292	301	308	312	277	290	303	282	313	276	295	274	295	275	263	267	264	243	241	212	219	229	222	212	219	199	208	205	190
																		G6	999_Free	255	282	294	288	297	304	293	292	277	277	269	250	275	280	280	267	241	230	245	219	233	245	237	216	206	205	199	187	194	179
																		H6	999_Free	229	264	252	282	263	278	274	271	235	220	240	233	239	231	216	224	223	208	221	221	210	210	208	207	196	208	195	184	177	191
																		A7	999_Free	0	0	0	0	0	0	0	0	0	0	0	0	0	0	0	0	0	0	0	0	0	0	0	0	0	0	0	0	0	0
																		B7	999_Free	0	0	0	0	0	0	0	0	0	0	0	0	0	0	0	0	0	0	0	0	0	0	0	0	0	0	0	0	0	0
																		C7	999_Free	0	0	0	0	0	0	0	0	0	0	0	0	0	0	0	0	0	0	0	0	0	0	0	0	0	0	0	0	0	0
																		D7	999_Free	0	0	0	0	0	0	0	0	0	0	0	0	0	0	0	0	0	0	0	0	0	0	0	0	0	0	0	0	0	0
																		E7	999_Free	0	0	0	0	0	0	0	0	0	0	0	0	0	0	0	0	0	0	0	0	0	0	0	0	0	0	0	0	0	0
																		F7	999_Free	0	0	0	0	0	0	0	0	0	0	0	0	0	0	0	0	0	0	0	0	0	0	0	0	0	0	0	0	0	0
																		G7	999_Free	0	0	0	0	0	0	0	0	0	0	0	0	0	0	0	0	0	0	0	0	0	0	0	0	0	0	0	0	0	0
																		H7	999_Free	0	0	0	0	0	0	0	0	0	0	0	0	0	0	0	0	0	0	0	0	0	0	0	0	0	0	0	0	0	0
																		A8	999_Free	0	0	0	0	0	0	0	0	0	0	0	0	0	0	0	0	0	0	0	0	0	0	0	0	0	0	0	0	0	0
																		B8	999_Free	0	0	0	0	0	0	0	0	0	0	0	0	0	0	0	0	0	0	0	0	0	0	0	0	0	0	0	0	0	0
																		C8	999_Free	0	0	0	0	0	0	0	0	0	0	0	0	0	0	0	0	0	0	0	0	0	0	0	0	0	0	0	0	0	0
																		D8	999_Free	0	0	0	0	0	0	0	0	0	0	0	0	0	0	0	0	0	0	0	0	0	0	0	0	0	0	0	0	0	0
																		E8	999_Free	0	0	0	0	0	0	0	0	0	0	0	0	0	0	0	0	0	0	0	0	0	0	0	0	0	0	0	0	0	0
																		F8	999_Free	0	0	0	0	0	0	0	0	0	0	0	0	0	0	0	0	0	0	0	0	0	0	0	0	0	0	0	0	0	0
																		G8	999_Free	0	0	0	0	0	0	0	0	0	0	0	0	0	0	0	0	0	0	0	0	0	0	0	0	0	0	0	0	0	0
																		H8	999_Free	0	0	0	0	0	0	0	0	0	0	0	0	0	0	0	0	0	0	0	0	0	0	0	0	0	0	0	0	0	0
																		A9	999_Free	3	8	7	7	6	7	7	2	10	1	7	4	9	5	4	5	8	7	1	5	5	6	2	5	3	3	1	4	1	3
																		B9	999_Free	0	0	0	0	0	0	0	0	0	0	0	0	0	0	0	0	0	0	0	0	0	0	0	0	0	0	0	0	0	0
																		C9	999_Free	0	0	0	0	0	0	0	0	0	0	0	0	0	0	0	0	0	0	0	0	0	0	0	0	0	0	0	0	0	0
																		D9	999_Free	0	0	0	0	0	0	0	0	0	0	0	0	0	0	0	0	0	0	0	0	0	0	0	0	0	0	0	0	0	0
																		E9	999_Free	0	0	0	0	0	0	0	0	0	0	0	0	0	0	0	0	0	0	0	0	0	0	0	0	0	0	0	0	0	0
																		F9	999_Free	0	0	0	0	0	0	0	0	0	0	0	0	0	0	0	0	0	0	0	0	0	0	0	0	0	0	0	0	0	0
																		G9	999_Free	0	0	0	0	0	0	0	0	0	0	0	0	0	0	0	0	0	0	0	0	0	0	0	0	0	0	0	0	0	0
																		H9	999_Free	0	0	0	0	0	0	0	0	0	0	0	0	0	0	0	0	0	0	0	0	0	0	0	0	0	0	0	0	0	0
																		A10	999_Free	0	0	0	0	0	0	0	0	0	0	0	0	0	0	0	0	0	0	0	0	0	0	0	0	0	0	0	0	0	0
																		B10	999_Free	0	0	0	0	0	0	0	0	0	0	0	0	0	0	0	0	0	0	0	0	0	0	0	0	0	0	0	0	0	0
																		C10	999_Free	0	0	0	0	0	0	0	0	0	0	0	0	0	0	0	0	0	0	0	0	0	0	0	0	0	0	0	0	0	0
																		D10	999_Free	0	0	0	0	0	0	0	0	0	0	0	0	0	0	0	0	0	0	0	0	0	0	0	0	0	0	0	0	0	0
																		E10	999_Free	0	0	0	0	0	0	0	0	0	0	0	0	0	0	0	0	0	0	0	0	0	0	0	0	0	0	0	0	0	0
																		F10	999_Free	0	0	0	0	0	0	0	0	0	0	0	0	0	0	0	0	0	0	0	0	0	0	0	0	0	0	0	0	0	0
																		G10	999_Free	0	0	0	0	0	0	0	0	0	0	0	0	0	0	0	0	0	0	0	0	0	0	0	0	0	0	0	0	0	0
																		H10	999_Free	0	0	0	0	0	0	0	0	0	0	0	0	0	0	0	0	0	0	0	0	0	0	0	0	0	0	0	0	0	0
																		A11	999_Free	0	0	0	0	0	0	0	0	0	0	0	0	0	0	0	0	0	0	0	0	0	0	0	0	0	0	0	0	0	0
																		B11	999_Free	0	0	0	0	0	0	0	0	0	0	0	0	0	0	0	0	0	0	0	0	0	0	0	0	0	0	0	0	0	0
																		C11	999_Free	0	0	0	0	0	0	0	0	0	0	0	0	0	0	0	0	0	0	0	0	0	0	0	0	0	0	0	0	0	0
																		D11	999_Free	0	0	0	0	0	0	0	0	0	0	0	0	0	0	0	0	0	0	0	0	0	0	0	0	0	0	0	0	0	0
																		E11	999_Free	0	0	0	0	0	0	0	0	0	0	0	0	0	0	0	0	0	0	0	0	0	0	0	0	0	0	0	0	0	0
																		F11	999_Free	0	0	0	0	0	0	0	0	0	0	0	0	0	0	0	0	0	0	0	0	0	0	0	0	0	0	0	0	0	0
																		G11	999_Free	0	0	0	0	0	0	0	0	0	0	0	0	0	0	0	0	0	0	0	0	0	0	0	0	0	0	0	0	0	0
																		H11	999_Free	0	0	0	0	0	0	0	0	0	0	0	0	0	0	0	0	0	0	0	0	0	0	0	0	0	0	0	0	0	0
																		A12	999_Free	0	0	0	0	0	0	0	0	0	0	0	0	0	0	0	0	0	0	0	0	0	0	0	0	0	0	0	0	0	0
																		B12	999_Free	0	0	0	0	0	0	0	0	0	0	0	0	0	0	0	0	0	0	0	0	0	0	0	0	0	0	0	0	0	0
																		C12	999_Free	0	0	0	0	0	0	0	0	0	0	0	0	0	0	0	0	0	0	0	0	0	0	0	0	0	0	0	0	0	0
																		D12	999_Free	0	0	0	0	0	0	0	0	0	0	0	0	0	0	0	0	0	0	0	0	0	0	0	0	0	0	0	0	0	0
																		E12	999_Free	0	0	0	0	0	0	0	0	0	0	0	0	0	0	0	0	0	0	0	0	0	0	0	0	0	0	0	0	0	0
																		F12	999_Free	0	0	0	0	0	0	0	0	0	0	0	0	0	0	0	0	0	0	0	0	0	0	0	0	0	0	0	0	0	0
																		G12	999_Free	0	0	0	0	0	0	0	0	0	0	0	0	0	0	0	0	0	0	0	0	0	0	0	0	0	0	0	0	0	0
																		H12	999_Free	0	0	0	0	0	0	0	0	0	0	0	0	0	0	0	0	0	0	0	0	0	0	0	0	0	0	0	0	0	0
																		<<<<<< Channel Activity >>>>>>
																		Channel	Well	Group/Time[m]	30	60	90	120	150	180	210	240	270	300	330	360	390	420	450	480	510	540	570	600	630	660	690	720	750	780	810	840	870
																		CH0	A1.0	999_Free	260	246	237	221	223	195	192	153	147	199	178	196	212	214	192	204	189	186	201	198	204	204	188	208	208	170	180	178	207
																		CH2	B1.0	999_Free	267	233	216	223	202	218	238	223	242	225	221	217	236	235	224	220	238	220	228	214	209	234	242	218	214	236	214	221	242
																		CH4	C1.0	999_Free	165	215	243	252	259	237	223	206	203	203	209	214	226	206	186	175	163	194	158	153	153	177	170	156	161	165	192	182	151
																		CH6	D1.0	999_Free	163	244	263	260	238	243	216	216	197	205	207	215	186	204	189	191	187	186	203	162	183	173	156	162	154	149	133	148	113
																		CH8	E1.0	999_Free	156	158	208	259	247	248	232	212	218	192	208	173	241	206	235	185	176	174	186	167	114	118	102	107	115	108	128	76	116
																		CH10	F1.0	999_Free	307	186	216	248	258	239	215	201	192	185	212	223	192	199	177	187	168	164	124	117	162	142	126	101	113	68	78	75	78
																		CH12	G1.0	999_Free	270	252	251	269	276	263	247	259	228	234	240	228	237	250	235	223	230	212	217	200	193	169	150	179	179	145	142	109	86
																		CH14	H1.0	999_Free	176	189	222	229	234	210	187	189	172	156	142	181	159	146	162	128	111	81	126	91	91	73	81	162	72	80	87	60	38
																		CH32	A2.0	999_Free	262	257	212	244	198	209	184	203	201	184	192	205	210	218	211	221	206	208	216	227	232	229	215	226	221	230	221	213	216
																		CH34	B2.0	999_Free	229	240	226	237	241	226	250	241	251	241	239	254	228	236	243	245	252	251	237	245	267	265	276	263	270	257	264	254	248
																		CH36	C2.0	999_Free	229	213	252	255	261	251	288	260	265	250	229	235	243	224	240	232	222	255	223	228	191	233	203	219	243	181	179	148	141
																		CH38	D2.0	999_Free	289	277	283	293	288	270	282	273	283	260	264	273	255	247	258	268	257	261	246	238	217	230	240	204	203	209	209	219	187
																		CH40	E2.0	999_Free	230	234	253	280	276	278	266	275	263	271	255	239	245	248	260	264	237	232	236	226	259	227	202	214	200	208	183	188	189
																		CH42	F2.0	999_Free	244	197	263	276	262	277	265	260	244	263	231	238	239	250	228	224	222	204	223	187	186	157	188	167	192	184	143	152	141
																		CH44	G2.0	999_Free	130	205	246	255	261	260	266	246	247	239	232	243	247	222	240	220	220	223	225	224	213	243	196	189	184	216	205	194	156
																		CH46	H2.0	999_Free	248	207	230	252	275	249	253	234	223	236	242	220	222	215	202	205	222	221	206	215	216	181	199	163	164	157	151	176	175
																		CH64	A3.0	999_Free	227	220	219	202	218	217	200	184	187	202	223	198	224	208	205	217	191	218	209	207	203	230	221	211	228	226	232	229	238
																		CH66	B3.0	999_Free	1	0	0	0	0	0	0	0	0	0	0	0	0	0	0	0	0	0	0	0	0	0	0	0	0	0	0	0	0
																		CH68	C3.0	999_Free	1	0	0	0	0	0	0	0	0	0	0	0	0	0	0	0	0	0	0	0	0	0	0	0	0	0	0	0	0
																		CH70	D3.0	999_Free	225	289	285	279	299	311	282	289	296	304	278	284	278	276	263	255	255	259	267	257	256	270	252	242	213	226	209	225	207
																		CH72	E3.0	999_Free	291	311	265	288	303	295	288	298	291	271	299	267	293	274	272	293	245	273	251	247	220	199	207	206	216	191	206	216	200
																		CH74	F3.0	999_Free	291	301	300	300	284	285	291	282	273	290	287	285	283	283	280	284	259	262	255	231	219	242	251	233	222	211	217	200	216
																		CH76	G3.0	999_Free	258	260	266	268	295	293	282	269	281	287	277	259	261	270	292	272	266	262	250	246	252	239	242	251	220	235	261	227	211
																		CH78	H3.0	999_Free	113	190	245	262	248	264	258	255	258	260	259	253	246	243	241	258	231	238	245	236	234	216	212	168	173	142	155	180	217
																		CH96	A4.0	999_Free	207	209	230	234	206	236	241	225	251	216	241	242	247	237	242	255	234	221	244	247	255	253	244	246	235	217	263	250	253
																		CH98	B4.0	999_Free	216	215	218	206	228	222	226	220	236	237	234	239	193	224	237	224	212	218	237	207	209	204	235	224	204	196	237	235	222
																		CH100	C4.0	999_Free	326	206	235	232	227	214	192	177	151	178	169	153	160	164	151	147	119	73	70	71	106	68	59	57	62	78	46	55	30
																		CH102	D4.0	999_Free	244	225	275	265	254	208	192	160	162	138	134	148	171	143	152	136	111	112	93	66	87	71	53	60	56	71	62	41	23
																		CH104	E4.0	999_Free	269	198	229	266	232	202	188	168	158	143	162	174	164	168	163	124	123	114	95	78	80	59	68	65	45	58	56	60	34
																		CH106	F4.0	999_Free	199	190	245	278	258	232	222	211	185	170	158	174	189	184	195	191	153	145	138	124	124	107	69	63	54	59	39	61	46
																		CH108	G4.0	999_Free	295	208	264	252	245	246	211	210	180	173	193	186	180	187	168	194	153	96	128	118	94	104	100	78	99	58	58	88	58
																		CH110	H4.0	999_Free	268	253	252	254	232	224	182	126	151	147	132	119	140	131	133	115	106	80	78	69	69	51	54	54	33	37	35	26	41
																		CH128	A5.0	999_Free	156	146	191	195	190	176	195	185	193	207	201	177	196	211	184	174	206	205	208	196	183	195	189	209	215	197	199	207	211
																		CH130	B5.0	999_Free	281	285	299	274	270	282	294	297	283	289	270	269	244	255	274	269	257	263	268	262	275	254	287	269	263	261	269	258	275
																		CH132	C5.0	999_Free	251	252	255	271	271	274	245	246	249	209	225	203	186	217	198	187	185	192	168	148	125	152	188	135	151	152	141	156	112
																		CH134	D5.0	999_Free	249	261	278	284	276	280	274	260	279	264	257	235	245	257	251	254	239	230	225	189	175	216	232	201	186	163	202	170	158
																		CH136	E5.0	999_Free	246	251	277	282	258	260	279	261	256	225	238	232	252	229	227	225	254	235	194	201	213	202	214	211	163	174	179	143	183
																		CH138	F5.0	999_Free	183	216	231	260	244	242	236	236	207	175	196	188	208	213	168	167	142	160	133	116	148	112	134	97	153	116	115	109	104
																		CH140	G5.0	999_Free	274	243	273	288	256	261	246	239	209	239	193	195	183	193	214	199	187	174	165	128	146	104	105	137	104	101	121	123	100
																		CH142	H5.0	999_Free	250	235	235	255	253	241	217	203	193	192	169	168	181	175	186	122	142	102	105	107	96	85	105	105	102	118	107	95	48
																		CH160	A6.0	999_Free	277	267	274	284	290	322	295	309	292	304	304	293	307	306	280	286	304	299	285	289	280	275	283	285	269	277	279	283	285
																		CH162	B6.0	999_Free	1	0	0	0	0	0	0	0	0	0	0	0	0	0	0	1	0	1	1	0	0	1	0	0	0	0	0	0	0
																		CH164	C6.0	999_Free	1	0	0	0	0	0	0	0	0	0	0	0	0	0	0	0	0	0	0	0	0	0	0	0	0	0	0	0	0
																		CH166	D6.0	999_Free	283	294	311	297	312	292	284	284	310	291	279	295	273	270	248	253	258	247	268	240	235	217	221	224	227	228	209	217	215
																		CH168	E6.0	999_Free	274	297	319	327	311	301	302	297	283	295	278	280	284	301	262	243	254	252	253	243	260	219	243	257	221	209	194	161	130
																		CH170	F6.0	999_Free	278	292	301	308	312	277	290	303	282	313	276	295	274	295	275	263	267	264	243	241	212	219	229	222	212	219	199	208	205
																		CH172	G6.0	999_Free	255	282	294	288	297	304	293	292	277	277	269	250	275	280	280	267	241	230	245	219	233	245	237	216	206	205	199	187	194
																		CH174	H6.0	999_Free	229	264	252	282	263	278	274	271	235	220	240	233	239	231	216	224	223	208	221	221	210	210	208	207	196	208	195	184	177
																		CH192	A7.0	999_Free	0	0	0	0	0	0	0	0	0	0	0	0	0	0	0	0	0	0	0	0	0	0	0	0	0	0	0	0	0
																		CH194	B7.0	999_Free	0	0	0	0	0	0	0	0	0	0	0	0	0	0	0	0	0	0	0	0	0	0	0	0	0	0	0	0	0
																		CH196	C7.0	999_Free	0	0	0	0	0	0	0	0	0	0	0	0	0	0	0	0	0	0	0	0	0	0	0	0	0	0	0	0	0
																		CH198	D7.0	999_Free	0	0	0	0	0	0	0	0	0	0	0	0	0	0	0	0	0	0	0	0	0	0	0	0	0	0	0	0	0
																		CH200	E7.0	999_Free	0	0	0	0	0	0	0	0	0	0	0	0	0	0	0	0	0	0	0	0	0	0	0	0	0	0	0	0	0
																		CH202	F7.0	999_Free	0	0	0	0	0	0	0	0	0	0	0	0	0	0	0	0	0	0	0	0	0	0	0	0	0	0	0	0	0
																		CH204	G7.0	999_Free	0	0	0	0	0	0	0	0	0	0	0	0	0	0	0	0	0	0	0	0	0	0	0	0	0	0	0	0	0
																		CH206	H7.0	999_Free	0	0	0	0	0	0	0	0	0	0	0	0	0	0	0	0	0	0	0	0	0	0	0	0	0	0	0	0	0
																		CH224	A8.0	999_Free	0	0	0	0	0	0	0	0	0	0	0	0	0	0	0	0	0	0	0	0	0	0	0	0	0	0	0	0	0
																		CH226	B8.0	999_Free	0	0	0	0	0	0	0	0	0	0	0	0	0	0	0	0	0	0	0	0	0	0	0	0	0	0	0	0	0
																		CH228	C8.0	999_Free	0	0	0	0	0	0	0	0	0	0	0	0	0	0	0	0	0	0	0	0	0	0	0	0	0	0	0	0	0
																		CH230	D8.0	999_Free	0	0	0	0	0	0	0	0	0	0	0	0	0	0	0	0	0	0	0	0	0	0	0	0	0	0	0	0	0
																		CH232	E8.0	999_Free	0	0	0	0	0	0	0	0	0	0	0	0	0	0	0	0	0	0	0	0	0	0	0	0	0	0	0	0	0
																		CH234	F8.0	999_Free	0	0	0	0	0	0	0	0	0	0	0	0	0	0	0	0	0	0	0	0	0	0	0	0	0	0	0	0	0
																		CH236	G8.0	999_Free	0	0	0	0	0	0	0	0	0	0	0	0	0	0	0	0	0	0	0	0	0	0	0	0	0	0	0	0	0
																		CH238	H8.0	999_Free	0	0	0	0	0	0	0	0	0	0	0	0	0	0	0	0	0	0	0	0	0	0	0	0	0	0	0	0	0
																		CH256	A9.0	999_Free	3	8	7	7	6	7	7	2	10	1	7	4	9	5	4	5	8	7	1	5	5	6	2	5	3	3	1	4	1
																		CH258	B9.0	999_Free	0	0	0	0	0	0	0	0	0	0	0	0	0	0	0	0	0	0	0	0	0	0	0	0	0	0	0	0	0
																		CH260	C9.0	999_Free	0	0	0	0	0	0	0	0	0	0	0	0	0	0	0	0	0	0	0	0	0	0	0	0	0	0	0	0	0
																		CH262	D9.0	999_Free	0	0	0	0	0	0	0	0	0	0	0	0	0	0	0	0	0	0	0	0	0	0	0	0	0	0	0	0	0
																		CH264	E9.0	999_Free	0	0	0	0	0	0	0	0	0	0	0	0	0	0	0	0	0	0	0	0	0	0	0	0	0	0	0	0	0
																		CH266	F9.0	999_Free	0	0	0	0	0	0	0	0	0	0	0	0	0	0	0	0	0	0	0	0	0	0	0	0	0	0	0	0	0
																		CH268	G9.0	999_Free	0	0	0	0	0	0	0	0	0	0	0	0	0	0	0	0	0	0	0	0	0	0	0	0	0	0	0	0	0
																		CH270	H9.0	999_Free	0	0	0	0	0	0	0	0	0	0	0	0	0	0	0	0	0	0	0	0	0	0	0	0	0	0	0	0	0
																		CH288	A10.0	999_Free	0	0	0	0	0	0	0	0	0	0	0	0	0	0	0	0	0	0	0	0	0	0	0	0	0	0	0	0	0
																		CH290	B10.0	999_Free	0	0	0	0	0	0	0	0	0	0	0	0	0	0	0	0	0	0	0	0	0	0	0	0	0	0	0	0	0
																		CH292	C10.0	999_Free	0	0	0	0	0	0	0	0	0	0	0	0	0	0	0	0	0	0	0	0	0	0	0	0	0	0	0	0	0
																		CH294	D10.0	999_Free	0	0	0	0	0	0	0	0	0	0	0	0	0	0	0	0	0	0	0	0	0	0	0	0	0	0	0	0	0
																		CH296	E10.0	999_Free	0	0	0	0	0	0	0	0	0	0	0	0	0	0	0	0	0	0	0	0	0	0	0	0	0	0	0	0	0
																		CH298	F10.0	999_Free	0	0	0	0	0	0	0	0	0	0	0	0	0	0	0	0	0	0	0	0	0	0	0	0	0	0	0	0	0
																		CH300	G10.0	999_Free	0	0	0	0	0	0	0	0	0	0	0	0	0	0	0	0	0	0	0	0	0	0	0	0	0	0	0	0	0
																		CH302	H10.0	999_Free	0	0	0	0	0	0	0	0	0	0	0	0	0	0	0	0	0	0	0	0	0	0	0	0	0	0	0	0	0
																		CH320	A11.0	999_Free	0	0	0	0	0	0	0	0	0	0	0	0	0	0	0	0	0	0	0	0	0	0	0	0	0	0	0	0	0
																		CH322	B11.0	999_Free	0	0	0	0	0	0	0	0	0	0	0	0	0	0	0	0	0	0	0	0	0	0	0	0	0	0	0	0	0
																		CH324	C11.0	999_Free	0	0	0	0	0	0	0	0	0	0	0	0	0	0	0	0	0	0	0	0	0	0	0	0	0	0	0	0	0
																		CH326	D11.0	999_Free	0	0	0	0	0	0	0	0	0	0	0	0	0	0	0	0	0	0	0	0	0	0	0	0	0	0	0	0	0
																		CH328	E11.0	999_Free	0	0	0	0	0	0	0	0	0	0	0	0	0	0	0	0	0	0	0	0	0	0	0	0	0	0	0	0	0
																		CH330	F11.0	999_Free	0	0	0	0	0	0	0	0	0	0	0	0	0	0	0	0	0	0	0	0	0	0	0	0	0	0	0	0	0
																		CH332	G11.0	999_Free	0	0	0	0	0	0	0	0	0	0	0	0	0	0	0	0	0	0	0	0	0	0	0	0	0	0	0	0	0
																		CH334	H11.0	999_Free	0	0	0	0	0	0	0	0	0	0	0	0	0	0	0	0	0	0	0	0	0	0	0	0	0	0	0	0	0
																		CH352	A12.0	999_Free	0	0	0	0	0	0	0	0	0	0	0	0	0	0	0	0	0	0	0	0	0	0	0	0	0	0	0	0	0
																		CH354	B12.0	999_Free	0	0	0	0	0	0	0	0	0	0	0	0	0	0	0	0	0	0	0	0	0	0	0	0	0	0	0	0	0
																		CH356	C12.0	999_Free	0	0	0	0	0	0	0	0	0	0	0	0	0	0	0	0	0	0	0	0	0	0	0	0	0	0	0	0	0
																		CH358	D12.0	999_Free	0	0	0	0	0	0	0	0	0	0	0	0	0	0	0	0	0	0	0	0	0	0	0	0	0	0	0	0	0
																		CH360	E12.0	999_Free	0	0	0	0	0	0	0	0	0	0	0	0	0	0	0	0	0	0	0	0	0	0	0	0	0	0	0	0	0
																		CH362	F12.0	999_Free	0	0	0	0	0	0	0	0	0	0	0	0	0	0	0	0	0	0	0	0	0	0	0	0	0	0	0	0	0
																		CH364	G12.0	999_Free	0	0	0	0	0	0	0	0	0	0	0	0	0	0	0	0	0	0	0	0	0	0	0	0	0	0	0	0	0
																		CH366	H12.0	999_Free	0	0	0	0	0	0	0	0	0	0	0	0	0	0	0	0	0	0	0	0	0	0	0	0	0	0	0	0	0
																		TRIAL #2
																		DATE:	2/28/2021 9:49:47 PM
																		FILE:	C:\wmicrotracker\p00044\20210226_1948
																		SUBPROJECT:	260221_col99_YA
																		<<<<<< Group Activity: Average Activity Counts per Data Interval>>>>>>
																		Group/Time[m]	30	60	90	120	150	180	210	240	270	300	330	360	390	420	450	480	510	540	570	600	630	660	690	720	750	780	810	840	870	900	930
																		000_Free	0	0	0	0	0	0	0	0	0	0	0	0	0	0	0	0	0	0	0	0	0	0	0	0	0	0	0	0	0	0	0
																		<<<<<< Group Activity: Standard Error >>>>>>
																		Group/Time[m]	30	60	90	120	150	180	210	240	270	300	330	360	390	420	450	480	510	540	570	600	630	660	690	720	750	780	810	840	870	900	930
																		000_Free	0	0	0	0	0	0	0	0	0	0	0	0	0	0	0	0	0	0	0	0	0	0	0	0	0	0	0	0	0	0	0
																		<<<<<< Group Activity: Number of wells/group >>>>>>
																		Group/Time[m]	30	60	90	120	150	180	210	240	270	300	330	360	390	420	450	480	510	540	570	600	630	660	690	720	750	780	810	840	870	900	930
																		000_Free	0	0	0	0	0	0	0	0	0	0	0	0	0	0	0	0	0	0	0	0	0	0	0	0	0	0	0	0	0	0	0
																		<<<<<< Number of Samples per Acquisition Interval [1unit=500values] >>>>>>
																		Time[m]	30	60	90	120	150	180	210	240	270	300	330	360	390	420	450	480	510	540	570	600	630	660	690	720	750	780	810	840	870	900	930
																		#Samples	30	30	30	30	30	30	30	30	30	30	30	30	30	30	30	30	30	30	30	30	30	30	30	30	30	30	30	30	30	30	30
																		<<<<<< Average Temperature [°C] >>>>>>
																		Time[m]	30	60	90	120	150	180	210	240	270	300	330	360	390	420	450	480	510	540	570	600	630	660	690	720	750	780	810	840	870	900	930
																		Temp[°C]	28	28	28	28	28	28	28	28	28	27.8	27.8	27.8	27.8	27.8	27.6	27.8	27.8	27.6	27.8	27.6	27.6	27.6	27.6	27.6	27.6	27.6	27.6	27.6	27.6	27.6	27.6
																		<<<<<< Well Activity >>>>>>
																		Well	Group/Time[m]	30	60	90	120	150	180	210	240	270	300	330	360	390	420	450	480	510	540	570	600	630	660	690	720	750	780	810	840	870	900
																		A1	999_Free	306	216	261	253	222	224	250	247	257	248	264	292	268	291	272	271	272	268	258	274	284	271	280	281	286	279	304	285	280	309
																		B1	999_Free	262	268	289	285	267	292	283	297	308	294	311	308	302	307	301	319	298	297	312	298	301	287	301	297	304	310	302	315	299	316
																		C1	999_Free	223	226	240	237	244	259	258	259	248	251	248	241	241	238	219	255	253	227	218	235	217	211	203	192	189	186	177	182	171	181
																		D1	999_Free	276	272	264	259	274	248	276	255	255	245	256	226	245	235	243	245	263	239	231	205	229	222	210	212	211	218	212	214	200	227
																		E1	999_Free	84	99	215	231	225	265	251	256	270	258	259	229	225	227	241	234	218	233	201	201	171	176	146	173	182	174	175	149	149	141
																		F1	999_Free	326	252	199	240	253	265	309	288	281	264	293	273	241	254	257	263	253	227	244	227	234	202	212	212	195	195	180	236	188	213
																		G1	999_Free	134	161	200	215	223	244	231	235	230	235	233	231	232	215	207	192	180	211	210	207	199	192	174	180	177	153	117	144	141	144
																		H1	999_Free	292	232	225	197	247	265	273	277	275	267	292	270	269	243	247	269	242	223	237	230	210	234	195	229	228	226	237	222	224	197
																		A2	999_Free	208	233	238	278	271	253	261	272	258	275	274	277	267	253	289	255	272	264	266	257	277	280	288	269	253	265	299	273	285	278
																		B2	999_Free	273	289	273	286	275	287	289	290	278	287	304	264	283	283	310	277	275	292	279	281	263	291	293	288	265	277	283	280	275	289
																		C2	999_Free	135	231	290	291	291	246	230	242	208	250	207	221	173	188	147	164	142	126	120	126	90	86	115	117	121	68	118	125	93	99
																		D2	999_Free	319	257	289	299	283	278	261	261	256	258	252	230	231	201	224	205	210	183	172	185	168	149	158	157	160	157	147	139	89	105
	Color	Linetype	Stressor	Half-activity time	Half-activity activity	p-value	95% Conf. Int. Lower	95% Conf. Int. Upper										E2	999_Free	304	228	291	291	303	290	269	248	244	237	259	243	243	233	215	171	158	173	178	158	164	154	161	144	122	72	83	65	51	56
	N2	No Linetype	M9	745	175.067													F2	999_Free	204	242	253	282	287	265	246	213	234	242	221	231	212	187	196	175	187	156	138	152	168	167	165	155	129	133	108	112	117	96
	N2	No Linetype	14 mM Arsenite	1133.82	119.026	5.19e-77	118	145										G2	999_Free	282	231	273	282	281	263	269	239	260	247	254	254	237	231	199	201	196	191	186	177	169	170	161	159	184	161	161	132	153	153
	col-99(SNP)8X	No Linetype	M9	1680	183.271													H2	999_Free	316	258	294	295	272	270	271	250	258	267	267	257	244	240	196	222	201	190	203	155	168	170	158	176	135	199	143	143	147	122
	col-99(SNP)8X	No Linetype	14 mM Arsenite	841	114.135	5.81e-125	174	189										A3	999_Free	352	362	368	340	326	333	321	316	320	314	331	308	315	303	317	310	322	294	283	290	281	272	284	280	274	288	292	296	272	296
																		B3	999_Free	229	255	299	282	281	270	287	282	289	290	286	292	290	306	300	314	295	309	287	280	298	305	310	297	283	278	279	271	298	301
																		C3	999_Free	318	246	280	272	281	280	297	289	285	292	269	265	275	264	271	277	257	247	226	229	230	236	228	226	234	190	215	189	160	150
																		D3	999_Free	160	182	261	270	271	283	274	272	262	261	242	236	238	245	227	248	195	204	185	143	145	165	159	155	129	146	127	111	90	83
																		E3	999_Free	157	330	324	275	285	271	277	262	263	243	245	240	250	243	260	252	221	203	222	210	208	206	180	176	190	192	165	184	178	152
																		F3	999_Free	101	170	250	277	254	261	242	224	219	221	213	197	211	220	179	173	156	140	143	114	100	109	118	76	38	119	93	87	77	71
																		G3	999_Free	336	318	274	269	266	242	262	255	254	231	261	240	247	250	212	199	209	210	188	162	180	162	157	170	145	151	115	152	148	135
																		H3	999_Free	311	175	201	234	280	275	273	258	233	211	240	214	178	201	206	192	179	215	161	159	173	146	142	120	136	126	112	107	125	94
																		A4	999_Free	310	275	246	252	269	259	283	286	280	289	282	286	298	293	266	288	279	283	280	268	273	271	264	270	282	272	293	276	269	243
																		B4	999_Free	257	258	272	262	254	274	254	293	281	302	278	281	286	290	287	294	275	296	270	257	286	301	299	295	294	298	272	302	289	286
																		C4	999_Free	289	245	246	260	264	269	245	244	243	268	246	240	243	233	204	229	238	226	203	204	182	191	185	163	169	181	145	142	122	131
																		D4	999_Free	158	199	253	259	265	277	275	269	265	271	263	271	273	245	258	234	259	213	225	190	208	202	158	213	199	200	190	166	197	194
																		E4	999_Free	269	262	251	259	260	256	239	241	240	250	243	250	225	226	231	224	221	207	216	200	188	205	201	212	185	176	178	148	177	170
																		F4	999_Free	295	341	287	269	288	266	273	276	279	273	273	273	240	224	236	227	196	199	201	187	189	143	170	144	171	149	141	145	149	105
																		G4	999_Free	223	189	230	265	276	277	268	238	254	222	230	227	222	205	223	182	195	158	191	144	141	162	152	143	138	139	146	170	107	127
																		H4	999_Free	107	182	231	232	274	266	280	246	271	266	213	227	223	202	223	242	210	202	178	179	182	153	182	176	150	193	191	193	145	117
																		A5	999_Free	92	145	195	211	213	213	219	232	241	238	245	229	242	229	253	257	255	259	256	259	265	260	270	275	281	264	287	284	290	277
																		B5	999_Free	110	121	146	154	174	189	181	193	192	198	217	236	239	219	231	245	242	237	203	221	222	225	235	237	253	231	227	241	259	244
																		C5	999_Free	255	240	259	262	270	295	280	287	266	251	253	240	262	267	242	217	242	215	210	198	203	208	194	165	138	166	179	187	163	153
																		D5	999_Free	151	200	216	246	262	275	254	270	265	234	245	238	224	208	214	220	224	198	211	175	192	198	185	178	210	202	186	177	182	159
																		E5	999_Free	324	253	250	252	278	290	270	265	256	246	250	239	244	242	238	236	196	209	208	201	197	180	183	197	192	171	163	182	166	180
																		F5	999_Free	226	236	257	267	302	298	278	287	268	266	250	241	252	228	228	228	220	214	209	209	202	195	189	202	179	182	216	179	176	182
																		G5	999_Free	314	246	252	257	310	282	293	267	289	283	266	256	259	243	215	227	234	229	222	212	213	201	200	224	230	218	215	201	179	185
																		H5	999_Free	141	167	216	225	234	252	243	234	243	248	245	222	220	213	222	228	229	202	211	194	210	199	203	172	198	172	185	178	166	160
																		A6	999_Free	306	310	293	254	250	257	255	260	248	253	270	270	257	240	242	268	250	250	238	258	275	250	243	248	237	249	266	253	268	267
																		B6	999_Free	231	264	257	239	238	253	265	269	288	270	290	272	289	292	290	298	285	282	282	277	300	297	278	282	288	292	283	302	283	287
																		C6	999_Free	331	239	239	235	259	255	266	293	244	270	264	252	227	240	235	221	237	215	246	216	204	219	206	199	192	223	182	188	165	188
																		D6	999_Free	209	214	234	237	255	254	255	242	235	228	242	226	217	214	212	204	197	201	199	202	194	191	188	177	180	178	175	170	190	167
																		E6	999_Free	117	186	243	255	243	269	250	256	255	234	238	240	205	196	217	206	199	195	179	167	153	180	177	130	141	92	142	147	111	104
																		F6	999_Free	313	240	234	255	256	251	234	237	231	242	228	230	254	211	217	200	210	165	150	154	155	130	120	167	124	130	144	139	119	140
																		G6	999_Free	109	134	186	229	235	252	221	185	189	137	135	156	188	151	123	91	97	77	89	91	63	70	85	83	69	117	85	64	73	103
																		H6	999_Free	142	180	236	252	267	273	292	281	297	287	291	284	281	281	262	257	242	247	227	219	241	212	232	239	194	220	194	229	183	175
																		A7	999_Free	260	236	249	273	274	268	283	287	277	276	282	267	292	287	267	287	267	278	268	261	261	268	246	264	256	269	258	263	280	279
																		B7	999_Free	227	229	244	252	242	282	273	238	267	261	261	252	250	245	275	243	240	233	245	223	236	233	240	223	219	234	230	197	224	234
																		C7	999_Free	225	216	217	199	214	171	215	203	220	189	211	210	210	221	205	217	153	157	148	148	182	194	160	178	164	182	137	118	138	111
																		D7	999_Free	249	227	213	224	209	235	217	201	209	208	225	230	205	199	183	190	173	167	142	167	133	144	163	160	182	179	165	156	157	141
																		E7	999_Free	243	246	210	191	202	207	191	167	179	193	195	218	211	211	231	210	183	160	182	162	188	159	145	163	165	156	167	176	167	158
																		F7	999_Free	215	220	204	166	189	194	189	203	213	198	226	216	208	209	209	197	153	180	155	174	141	115	146	100	128	114	108	148	130	115
																		G7	999_Free	230	224	194	196	196	211	191	195	201	212	211	224	202	220	212	210	209	230	216	191	195	201	192	188	187	198	187	166	162	160
																		H7	999_Free	232	212	195	208	174	199	211	186	185	202	215	230	245	233	232	219	222	201	225	213	187	217	188	209	228	227	214	228	214	211
																		A8	999_Free	274	312	292	303	297	294	329	320	308	316	296	301	316	309	307	304	289	316	313	324	301	309	316	277	304	281	287	302	309	295
																		B8	999_Free	223	196	218	208	210	223	231	261	258	271	286	265	270	271	275	284	268	276	277	268	275	273	251	264	278	257	292	282	306	266
																		C8	999_Free	213	199	276	287	278	284	274	288	274	273	267	269	245	245	246	249	227	223	229	227	228	217	213	217	201	215	209	191	196	194
																		D8	999_Free	209	211	235	238	272	274	278	280	267	254	271	239	235	247	240	260	211	222	190	153	182	187	169	168	156	170	160	154	157	168
																		E8	999_Free	281	218	234	253	261	283	271	276	272	233	211	255	228	249	238	223	226	232	210	175	200	209	194	163	186	206	171	143	158	177
																		F8	999_Free	165	139	187	215	257	238	205	202	188	191	176	153	173	183	166	162	147	135	102	97	89	117	97	111	100	77	68	33	37	25
																		G8	999_Free	125	142	205	238	266	268	235	222	207	219	182	175	178	194	177	179	161	169	135	138	107	118	116	93	113	121	108	129	78	77
																		H8	999_Free	274	191	209	209	271	256	267	261	271	257	245	255	243	263	245	224	224	203	205	198	222	197	194	174	189	189	190	193	200	162
																		A9	999_Free	0	0	0	0	0	0	0	0	0	0	0	0	0	0	0	0	0	0	0	0	0	0	0	0	0	0	0	0	0	0
																		B9	999_Free	0	0	0	0	0	0	0	0	0	0	0	0	0	0	0	0	0	0	0	0	0	0	0	0	0	0	0	0	0	0
																		C9	999_Free	0	0	0	0	0	0	0	0	0	0	0	0	0	0	0	0	0	0	0	0	0	0	0	0	0	0	0	0	0	0
																		D9	999_Free	0	0	0	0	0	0	0	0	0	0	0	0	0	0	0	0	0	0	0	0	0	0	0	0	0	0	0	0	0	0
																		E9	999_Free	0	0	0	0	0	0	0	0	0	0	0	0	0	0	0	0	0	0	0	0	0	0	0	0	0	0	0	0	0	0
																		F9	999_Free	1	3	2	0	0	0	0	0	0	0	0	0	0	0	0	0	0	0	0	0	0	0	0	0	0	0	0	0	0	0
																		G9	999_Free	4	3	1	1	0	0	0	0	0	0	0	0	0	0	0	0	0	0	0	0	0	0	0	0	0	0	0	0	0	0
																		H9	999_Free	0	0	0	0	0	0	0	0	0	0	0	0	0	0	0	0	0	0	0	0	0	0	0	0	0	0	0	0	0	0
																		A10	999_Free	0	0	0	0	0	0	0	0	0	0	0	0	0	0	0	0	0	0	0	0	0	0	0	0	0	0	0	0	0	0
																		B10	999_Free	0	1	0	2	0	0	2	0	0	0	1	0	0	0	0	0	0	0	0	0	0	0	0	0	0	0	0	0	0	0
																		C10	999_Free	0	0	0	0	0	0	0	0	0	0	0	0	0	0	0	0	0	0	0	0	0	0	0	0	0	0	0	0	0	0
																		D10	999_Free	0	0	0	0	0	0	0	0	0	0	0	0	0	0	0	0	0	0	0	0	0	0	0	0	0	0	0	0	0	0
																		E10	999_Free	0	0	0	0	0	0	0	0	0	0	0	0	0	0	0	0	0	0	0	0	0	0	0	0	0	0	0	0	0	0
																		F10	999_Free	0	0	0	0	0	0	0	0	0	0	0	0	0	0	0	0	0	0	0	0	0	0	0	0	0	0	0	0	0	0
																		G10	999_Free	0	0	0	0	0	0	0	0	0	0	0	0	0	0	0	0	0	0	0	0	0	0	0	0	0	0	0	0	0	0
																		H10	999_Free	0	0	0	0	0	0	0	0	0	0	0	0	0	0	0	0	0	0	0	0	0	0	0	0	0	0	0	0	0	0
																		A11	999_Free	0	0	0	0	0	0	0	0	0	0	0	0	0	0	0	0	0	0	0	0	0	0	0	0	0	0	0	0	0	0
																		B11	999_Free	0	0	0	0	0	0	0	0	0	0	0	0	0	0	0	0	0	0	0	0	0	0	0	0	0	0	0	0	0	0
																		C11	999_Free	0	0	0	0	0	0	0	0	0	0	0	0	0	0	0	0	0	0	0	0	0	0	0	0	0	0	0	0	0	0
																		D11	999_Free	0	0	0	0	0	0	0	0	0	0	0	0	0	0	0	0	0	0	0	0	0	0	0	0	0	0	0	0	0	0
																		E11	999_Free	0	0	0	0	0	0	0	0	0	0	0	0	0	0	0	0	0	0	0	0	0	0	0	0	0	0	0	0	0	0
																		F11	999_Free	0	1	0	0	0	0	0	0	0	0	0	0	0	0	0	0	0	0	0	0	0	0	0	0	0	0	0	0	0	0
																		G11	999_Free	0	0	0	0	0	0	0	0	0	0	0	0	0	0	0	0	0	0	0	0	0	0	0	0	0	0	0	0	0	0
																		H11	999_Free	0	2	0	0	0	0	0	0	0	0	0	0	0	0	0	0	0	0	0	0	0	0	0	0	0	0	0	0	0	0
																		A12	999_Free	0	0	0	0	0	0	0	0	0	0	0	0	0	0	0	0	0	0	0	0	0	0	0	0	0	0	0	0	0	0
																		B12	999_Free	0	1	0	3	5	1	2	0	4	0	2	0	1	0	1	0	0	2	0	0	0	0	0	0	0	0	0	0	0	0
																		C12	999_Free	0	0	0	0	0	0	0	0	0	0	0	0	0	0	0	0	0	0	0	0	0	0	0	0	0	0	0	0	0	0
																		D12	999_Free	2	4	0	2	4	2	2	1	0	0	0	0	0	0	0	0	0	0	0	0	0	0	0	0	0	0	0	0	0	0
																		E12	999_Free	6	3	0	0	0	0	0	0	0	0	0	0	0	0	0	0	0	0	0	0	0	0	0	0	0	0	0	0	0	0
																		F12	999_Free	0	0	0	0	0	0	0	0	0	0	0	0	0	0	0	0	0	0	0	0	0	0	0	0	0	0	0	0	0	0
																		G12	999_Free	10	1	0	0	0	0	0	0	0	0	0	0	0	0	0	0	0	0	0	0	0	0	0	0	0	0	0	0	0	0
																		H12	999_Free	0	0	0	0	0	0	0	0	0	0	0	0	0	0	0	0	0	0	0	0	0	0	0	0	0	0	0	0	0	0
																		<<<<<< Channel Activity >>>>>>
																		Channel	Well	Group/Time[m]	30	60	90	120	150	180	210	240	270	300	330	360	390	420	450	480	510	540	570	600	630	660	690	720	750	780	810	840	870
																		CH0	A1.0	999_Free	306	216	261	253	222	224	250	247	257	248	264	292	268	291	272	271	272	268	258	274	284	271	280	281	286	279	304	285	280
																		CH2	B1.0	999_Free	262	268	289	285	267	292	283	297	308	294	311	308	302	307	301	319	298	297	312	298	301	287	301	297	304	310	302	315	299
																		CH4	C1.0	999_Free	223	226	240	237	244	259	258	259	248	251	248	241	241	238	219	255	253	227	218	235	217	211	203	192	189	186	177	182	171
																		CH6	D1.0	999_Free	276	272	264	259	274	248	276	255	255	245	256	226	245	235	243	245	263	239	231	205	229	222	210	212	211	218	212	214	200
																		CH8	E1.0	999_Free	84	99	215	231	225	265	251	256	270	258	259	229	225	227	241	234	218	233	201	201	171	176	146	173	182	174	175	149	149
																		CH10	F1.0	999_Free	326	252	199	240	253	265	309	288	281	264	293	273	241	254	257	263	253	227	244	227	234	202	212	212	195	195	180	236	188
																		CH12	G1.0	999_Free	134	161	200	215	223	244	231	235	230	235	233	231	232	215	207	192	180	211	210	207	199	192	174	180	177	153	117	144	141
																		CH14	H1.0	999_Free	292	232	225	197	247	265	273	277	275	267	292	270	269	243	247	269	242	223	237	230	210	234	195	229	228	226	237	222	224
																		CH32	A2.0	999_Free	208	233	238	278	271	253	261	272	258	275	274	277	267	253	289	255	272	264	266	257	277	280	288	269	253	265	299	273	285
																		CH34	B2.0	999_Free	273	289	273	286	275	287	289	290	278	287	304	264	283	283	310	277	275	292	279	281	263	291	293	288	265	277	283	280	275
																		CH36	C2.0	999_Free	135	231	290	291	291	246	230	242	208	250	207	221	173	188	147	164	142	126	120	126	90	86	115	117	121	68	118	125	93
																		CH38	D2.0	999_Free	319	257	289	299	283	278	261	261	256	258	252	230	231	201	224	205	210	183	172	185	168	149	158	157	160	157	147	139	89
																		CH40	E2.0	999_Free	304	228	291	291	303	290	269	248	244	237	259	243	243	233	215	171	158	173	178	158	164	154	161	144	122	72	83	65	51
																		CH42	F2.0	999_Free	204	242	253	282	287	265	246	213	234	242	221	231	212	187	196	175	187	156	138	152	168	167	165	155	129	133	108	112	117
																		CH44	G2.0	999_Free	282	231	273	282	281	263	269	239	260	247	254	254	237	231	199	201	196	191	186	177	169	170	161	159	184	161	161	132	153
																		CH46	H2.0	999_Free	316	258	294	295	272	270	271	250	258	267	267	257	244	240	196	222	201	190	203	155	168	170	158	176	135	199	143	143	147
																		CH64	A3.0	999_Free	352	362	368	340	326	333	321	316	320	314	331	308	315	303	317	310	322	294	283	290	281	272	284	280	274	288	292	296	272
																		CH66	B3.0	999_Free	229	255	299	282	281	270	287	282	289	290	286	292	290	306	300	314	295	309	287	280	298	305	310	297	283	278	279	271	298
																		CH68	C3.0	999_Free	318	246	280	272	281	280	297	289	285	292	269	265	275	264	271	277	257	247	226	229	230	236	228	226	234	190	215	189	160
																		CH70	D3.0	999_Free	160	182	261	270	271	283	274	272	262	261	242	236	238	245	227	248	195	204	185	143	145	165	159	155	129	146	127	111	90
																		CH72	E3.0	999_Free	157	330	324	275	285	271	277	262	263	243	245	240	250	243	260	252	221	203	222	210	208	206	180	176	190	192	165	184	178
																		CH74	F3.0	999_Free	101	170	250	277	254	261	242	224	219	221	213	197	211	220	179	173	156	140	143	114	100	109	118	76	38	119	93	87	77
																		CH76	G3.0	999_Free	336	318	274	269	266	242	262	255	254	231	261	240	247	250	212	199	209	210	188	162	180	162	157	170	145	151	115	152	148
																		CH78	H3.0	999_Free	311	175	201	234	280	275	273	258	233	211	240	214	178	201	206	192	179	215	161	159	173	146	142	120	136	126	112	107	125
																		CH96	A4.0	999_Free	310	275	246	252	269	259	283	286	280	289	282	286	298	293	266	288	279	283	280	268	273	271	264	270	282	272	293	276	269
																		CH98	B4.0	999_Free	257	258	272	262	254	274	254	293	281	302	278	281	286	290	287	294	275	296	270	257	286	301	299	295	294	298	272	302	289
																		CH100	C4.0	999_Free	289	245	246	260	264	269	245	244	243	268	246	240	243	233	204	229	238	226	203	204	182	191	185	163	169	181	145	142	122
																		CH102	D4.0	999_Free	158	199	253	259	265	277	275	269	265	271	263	271	273	245	258	234	259	213	225	190	208	202	158	213	199	200	190	166	197
																		CH104	E4.0	999_Free	269	262	251	259	260	256	239	241	240	250	243	250	225	226	231	224	221	207	216	200	188	205	201	212	185	176	178	148	177
																		CH106	F4.0	999_Free	295	341	287	269	288	266	273	276	279	273	273	273	240	224	236	227	196	199	201	187	189	143	170	144	171	149	141	145	149
																		CH108	G4.0	999_Free	223	189	230	265	276	277	268	238	254	222	230	227	222	205	223	182	195	158	191	144	141	162	152	143	138	139	146	170	107
																		CH110	H4.0	999_Free	107	182	231	232	274	266	280	246	271	266	213	227	223	202	223	242	210	202	178	179	182	153	182	176	150	193	191	193	145
																		CH128	A5.0	999_Free	92	145	195	211	213	213	219	232	241	238	245	229	242	229	253	257	255	259	256	259	265	260	270	275	281	264	287	284	290
																		CH130	B5.0	999_Free	110	121	146	154	174	189	181	193	192	198	217	236	239	219	231	245	242	237	203	221	222	225	235	237	253	231	227	241	259
																		CH132	C5.0	999_Free	255	240	259	262	270	295	280	287	266	251	253	240	262	267	242	217	242	215	210	198	203	208	194	165	138	166	179	187	163
																		CH134	D5.0	999_Free	151	200	216	246	262	275	254	270	265	234	245	238	224	208	214	220	224	198	211	175	192	198	185	178	210	202	186	177	182
																		CH136	E5.0	999_Free	324	253	250	252	278	290	270	265	256	246	250	239	244	242	238	236	196	209	208	201	197	180	183	197	192	171	163	182	166
																		CH138	F5.0	999_Free	226	236	257	267	302	298	278	287	268	266	250	241	252	228	228	228	220	214	209	209	202	195	189	202	179	182	216	179	176
																		CH140	G5.0	999_Free	314	246	252	257	310	282	293	267	289	283	266	256	259	243	215	227	234	229	222	212	213	201	200	224	230	218	215	201	179
																		CH142	H5.0	999_Free	141	167	216	225	234	252	243	234	243	248	245	222	220	213	222	228	229	202	211	194	210	199	203	172	198	172	185	178	166
																		CH160	A6.0	999_Free	306	310	293	254	250	257	255	260	248	253	270	270	257	240	242	268	250	250	238	258	275	250	243	248	237	249	266	253	268
																		CH162	B6.0	999_Free	231	264	257	239	238	253	265	269	288	270	290	272	289	292	290	298	285	282	282	277	300	297	278	282	288	292	283	302	283
																		CH164	C6.0	999_Free	331	239	239	235	259	255	266	293	244	270	264	252	227	240	235	221	237	215	246	216	204	219	206	199	192	223	182	188	165
																		CH166	D6.0	999_Free	209	214	234	237	255	254	255	242	235	228	242	226	217	214	212	204	197	201	199	202	194	191	188	177	180	178	175	170	190
																		CH168	E6.0	999_Free	117	186	243	255	243	269	250	256	255	234	238	240	205	196	217	206	199	195	179	167	153	180	177	130	141	92	142	147	111
																		CH170	F6.0	999_Free	313	240	234	255	256	251	234	237	231	242	228	230	254	211	217	200	210	165	150	154	155	130	120	167	124	130	144	139	119
																		CH172	G6.0	999_Free	109	134	186	229	235	252	221	185	189	137	135	156	188	151	123	91	97	77	89	91	63	70	85	83	69	117	85	64	73
																		CH174	H6.0	999_Free	142	180	236	252	267	273	292	281	297	287	291	284	281	281	262	257	242	247	227	219	241	212	232	239	194	220	194	229	183
																		CH192	A7.0	999_Free	260	236	249	273	274	268	283	287	277	276	282	267	292	287	267	287	267	278	268	261	261	268	246	264	256	269	258	263	280
																		CH194	B7.0	999_Free	227	229	244	252	242	282	273	238	267	261	261	252	250	245	275	243	240	233	245	223	236	233	240	223	219	234	230	197	224
																		CH196	C7.0	999_Free	225	216	217	199	214	171	215	203	220	189	211	210	210	221	205	217	153	157	148	148	182	194	160	178	164	182	137	118	138
																		CH198	D7.0	999_Free	249	227	213	224	209	235	217	201	209	208	225	230	205	199	183	190	173	167	142	167	133	144	163	160	182	179	165	156	157
																		CH200	E7.0	999_Free	243	246	210	191	202	207	191	167	179	193	195	218	211	211	231	210	183	160	182	162	188	159	145	163	165	156	167	176	167
																		CH202	F7.0	999_Free	215	220	204	166	189	194	189	203	213	198	226	216	208	209	209	197	153	180	155	174	141	115	146	100	128	114	108	148	130
																		CH204	G7.0	999_Free	230	224	194	196	196	211	191	195	201	212	211	224	202	220	212	210	209	230	216	191	195	201	192	188	187	198	187	166	162
																		CH206	H7.0	999_Free	232	212	195	208	174	199	211	186	185	202	215	230	245	233	232	219	222	201	225	213	187	217	188	209	228	227	214	228	214
																		CH224	A8.0	999_Free	274	312	292	303	297	294	329	320	308	316	296	301	316	309	307	304	289	316	313	324	301	309	316	277	304	281	287	302	309
																		CH226	B8.0	999_Free	223	196	218	208	210	223	231	261	258	271	286	265	270	271	275	284	268	276	277	268	275	273	251	264	278	257	292	282	306
																		CH228	C8.0	999_Free	213	199	276	287	278	284	274	288	274	273	267	269	245	245	246	249	227	223	229	227	228	217	213	217	201	215	209	191	196
																		CH230	D8.0	999_Free	209	211	235	238	272	274	278	280	267	254	271	239	235	247	240	260	211	222	190	153	182	187	169	168	156	170	160	154	157
																		CH232	E8.0	999_Free	281	218	234	253	261	283	271	276	272	233	211	255	228	249	238	223	226	232	210	175	200	209	194	163	186	206	171	143	158
																		CH234	F8.0	999_Free	165	139	187	215	257	238	205	202	188	191	176	153	173	183	166	162	147	135	102	97	89	117	97	111	100	77	68	33	37
																		CH236	G8.0	999_Free	125	142	205	238	266	268	235	222	207	219	182	175	178	194	177	179	161	169	135	138	107	118	116	93	113	121	108	129	78
																		CH238	H8.0	999_Free	274	191	209	209	271	256	267	261	271	257	245	255	243	263	245	224	224	203	205	198	222	197	194	174	189	189	190	193	200
																		CH256	A9.0	999_Free	0	0	0	0	0	0	0	0	0	0	0	0	0	0	0	0	0	0	0	0	0	0	0	0	0	0	0	0	0
																		CH258	B9.0	999_Free	0	0	0	0	0	0	0	0	0	0	0	0	0	0	0	0	0	0	0	0	0	0	0	0	0	0	0	0	0
																		CH260	C9.0	999_Free	0	0	0	0	0	0	0	0	0	0	0	0	0	0	0	0	0	0	0	0	0	0	0	0	0	0	0	0	0
																		CH262	D9.0	999_Free	0	0	0	0	0	0	0	0	0	0	0	0	0	0	0	0	0	0	0	0	0	0	0	0	0	0	0	0	0
																		CH264	E9.0	999_Free	0	0	0	0	0	0	0	0	0	0	0	0	0	0	0	0	0	0	0	0	0	0	0	0	0	0	0	0	0
																		CH266	F9.0	999_Free	1	3	2	0	0	0	0	0	0	0	0	0	0	0	0	0	0	0	0	0	0	0	0	0	0	0	0	0	0
																		CH268	G9.0	999_Free	4	3	1	1	0	0	0	0	0	0	0	0	0	0	0	0	0	0	0	0	0	0	0	0	0	0	0	0	0
																		CH270	H9.0	999_Free	0	0	0	0	0	0	0	0	0	0	0	0	0	0	0	0	0	0	0	0	0	0	0	0	0	0	0	0	0
																		CH288	A10.0	999_Free	0	0	0	0	0	0	0	0	0	0	0	0	0	0	0	0	0	0	0	0	0	0	0	0	0	0	0	0	0
																		CH290	B10.0	999_Free	0	1	0	2	0	0	2	0	0	0	1	0	0	0	0	0	0	0	0	0	0	0	0	0	0	0	0	0	0
																		CH292	C10.0	999_Free	0	0	0	0	0	0	0	0	0	0	0	0	0	0	0	0	0	0	0	0	0	0	0	0	0	0	0	0	0
																		CH294	D10.0	999_Free	0	0	0	0	0	0	0	0	0	0	0	0	0	0	0	0	0	0	0	0	0	0	0	0	0	0	0	0	0
																		CH296	E10.0	999_Free	0	0	0	0	0	0	0	0	0	0	0	0	0	0	0	0	0	0	0	0	0	0	0	0	0	0	0	0	0
																		CH298	F10.0	999_Free	0	0	0	0	0	0	0	0	0	0	0	0	0	0	0	0	0	0	0	0	0	0	0	0	0	0	0	0	0
																		CH300	G10.0	999_Free	0	0	0	0	0	0	0	0	0	0	0	0	0	0	0	0	0	0	0	0	0	0	0	0	0	0	0	0	0
																		CH302	H10.0	999_Free	0	0	0	0	0	0	0	0	0	0	0	0	0	0	0	0	0	0	0	0	0	0	0	0	0	0	0	0	0
																		CH320	A11.0	999_Free	0	0	0	0	0	0	0	0	0	0	0	0	0	0	0	0	0	0	0	0	0	0	0	0	0	0	0	0	0
																		CH322	B11.0	999_Free	0	0	0	0	0	0	0	0	0	0	0	0	0	0	0	0	0	0	0	0	0	0	0	0	0	0	0	0	0
																		CH324	C11.0	999_Free	0	0	0	0	0	0	0	0	0	0	0	0	0	0	0	0	0	0	0	0	0	0	0	0	0	0	0	0	0
																		CH326	D11.0	999_Free	0	0	0	0	0	0	0	0	0	0	0	0	0	0	0	0	0	0	0	0	0	0	0	0	0	0	0	0	0
																		CH328	E11.0	999_Free	0	0	0	0	0	0	0	0	0	0	0	0	0	0	0	0	0	0	0	0	0	0	0	0	0	0	0	0	0
																		CH330	F11.0	999_Free	0	1	0	0	0	0	0	0	0	0	0	0	0	0	0	0	0	0	0	0	0	0	0	0	0	0	0	0	0
																		CH332	G11.0	999_Free	0	0	0	0	0	0	0	0	0	0	0	0	0	0	0	0	0	0	0	0	0	0	0	0	0	0	0	0	0
																		CH334	H11.0	999_Free	0	2	0	0	0	0	0	0	0	0	0	0	0	0	0	0	0	0	0	0	0	0	0	0	0	0	0	0	0
																		CH352	A12.0	999_Free	0	0	0	0	0	0	0	0	0	0	0	0	0	0	0	0	0	0	0	0	0	0	0	0	0	0	0	0	0
																		CH354	B12.0	999_Free	0	1	0	3	5	1	2	0	4	0	2	0	1	0	1	0	0	2	0	0	0	0	0	0	0	0	0	0	0
																		CH356	C12.0	999_Free	0	0	0	0	0	0	0	0	0	0	0	0	0	0	0	0	0	0	0	0	0	0	0	0	0	0	0	0	0
																		CH358	D12.0	999_Free	2	4	0	2	4	2	2	1	0	0	0	0	0	0	0	0	0	0	0	0	0	0	0	0	0	0	0	0	0
																		CH360	E12.0	999_Free	6	3	0	0	0	0	0	0	0	0	0	0	0	0	0	0	0	0	0	0	0	0	0	0	0	0	0	0	0
																		CH362	F12.0	999_Free	0	0	0	0	0	0	0	0	0	0	0	0	0	0	0	0	0	0	0	0	0	0	0	0	0	0	0	0	0
																		CH364	G12.0	999_Free	10	1	0	0	0	0	0	0	0	0	0	0	0	0	0	0	0	0	0	0	0	0	0	0	0	0	0	0	0
																		CH366	H12.0	999_Free	0	0	0	0	0	0	0	0	0	0	0	0	0	0	0	0	0	0	0	0	0	0	0	0	0	0	0	0	0
																		TRIAL #3
																		DATE:	1/23/2021 7:25:50 PM
																		FILE:	C:\wmicrotracker\p00038\20210121_1725
																		SUBPROJECT:	21-1-21_col994x8x_YA
																		<<<<<< Group Activity: Average Activity Counts per Data Interval>>>>>>
																		Group/Time[m]	30	60	90	120	150	180	210	240	270	300	330	360	390	420	450	480	510	540	570	600	630	660	690	720	750	780	810	840	870	900	930
																		000_Free	0	0	0	0	0	0	0	0	0	0	0	0	0	0	0	0	0	0	0	0	0	0	0	0	0	0	0	0	0	0	0
																		<<<<<< Group Activity: Standard Error >>>>>>
																		Group/Time[m]	30	60	90	120	150	180	210	240	270	300	330	360	390	420	450	480	510	540	570	600	630	660	690	720	750	780	810	840	870	900	930
																		000_Free	0	0	0	0	0	0	0	0	0	0	0	0	0	0	0	0	0	0	0	0	0	0	0	0	0	0	0	0	0	0	0
																		<<<<<< Group Activity: Number of wells/group >>>>>>
																		Group/Time[m]	30	60	90	120	150	180	210	240	270	300	330	360	390	420	450	480	510	540	570	600	630	660	690	720	750	780	810	840	870	900	930
																		000_Free	0	0	0	0	0	0	0	0	0	0	0	0	0	0	0	0	0	0	0	0	0	0	0	0	0	0	0	0	0	0	0
																		<<<<<< Number of Samples per Acquisition Interval [1unit=500values] >>>>>>
																		Time[m]	30	60	90	120	150	180	210	240	270	300	330	360	390	420	450	480	510	540	570	600	630	660	690	720	750	780	810	840	870	900	930
																		#Samples	30	30	30	30	30	30	30	30	30	30	30	30	30	30	30	30	30	30	30	30	30	30	30	30	30	30	30	30	30	30	30
																		<<<<<< Average Temperature [°C] >>>>>>
																		Time[m]	30	60	90	120	150	180	210	240	270	300	330	360	390	420	450	480	510	540	570	600	630	660	690	720	750	780	810	840	870	900	930
																		Temp[°C]	27.2	27.2	27.2	26.9	26.9	26.9	26.9	26.7	26.7	26.7	26.7	26.7	26.7	26.5	26.5	26.5	26.5	26.5	26.5	26.5	26.5	26.5	26.5	26.5	26.5	26.5	26.5	26.5	26.3	26.5	26.3
																		<<<<<< Well Activity >>>>>>
																		Well	Group/Time[m]	30	60	90	120	150	180	210	240	270	300	330	360	390	420	450	480	510	540	570	600	630	660	690	720	750	780	810	840	870	900
																		A1	999_Free	347	333	331	346	345	344	359	332	324	324	320	312	317	310	307	332	314	315	330	304	317	314	312	321	305	320	312	321	332	308
																		B1	999_Free	167	224	269	254	257	243	247	285	268	277	273	280	292	252	277	274	272	269	259	265	291	268	246	276	291	268	253	266	267	268
																		C1	999_Free	318	263	285	281	291	273	252	243	243	233	254	239	227	247	258	256	256	261	240	225	229	213	201	195	209	188	149	134	168	163
																		D1	999_Free	215	192	233	244	254	255	225	247	233	191	219	229	225	230	230	233	234	249	214	215	220	216	172	177	144	170	156	152	142	160
																		E1	999_Free	168	210	248	264	263	271	275	273	268	247	252	231	261	240	234	238	243	244	226	220	230	216	204	216	201	176	202	179	192	162
																		F1	999_Free	105	201	243	257	271	276	241	228	219	208	195	207	210	229	230	224	223	224	234	221	223	188	191	226	198	181	177	150	149	104
																		G1	999_Free	274	237	288	292	295	272	279	264	262	266	257	248	245	272	270	254	266	261	259	240	248	232	219	228	206	222	195	226	200	187
																		H1	999_Free	313	255	273	291	300	295	304	277	278	262	257	268	261	276	258	283	282	273	272	263	249	259	247	224	233	222	209	212	205	203
																		A2	999_Free	295	314	296	303	308	309	306	312	302	314	319	303	299	310	298	323	298	319	330	322	307	308	312	307	318	309	309	296	310	304
																		B2	999_Free	248	240	259	256	293	274	284	279	256	294	280	282	303	269	284	275	256	257	288	276	283	283	266	282	263	270	268	274	289	280
																		C2	999_Free	246	263	266	238	246	246	253	262	256	245	252	242	269	231	218	236	206	228	203	207	230	208	221	199	203	188	202	190	167	160
																		D2	999_Free	259	250	272	292	282	273	273	268	270	248	252	261	281	234	259	226	218	242	237	220	229	232	249	211	217	210	221	203	190	200
																		E2	999_Free	266	277	272	268	263	266	291	276	276	289	266	247	262	254	279	265	253	235	222	232	228	225	208	219	188	241	220	209	232	214
	Color	Linetype	Stressor	Half-activity time	Half-activity activity	p-value	95% Conf. Int. Lower	95% Conf. Int. Upper										F2	999_Free	260	265	272	284	290	287	291	291	298	294	273	270	279	283	257	275	265	252	232	239	222	226	234	231	217	228	225	222	215	231
	N2	No Linetype	M9	1852.5	252.662													G2	999_Free	209	248	284	308	277	291	287	279	266	278	274	252	265	283	245	249	265	256	252	222	256	251	218	233	213	190	219	208	196	219
	N2	No Linetype	14 mM Arsenite	1291.36	133.456	1.15e-126	158	187										H2	999_Free	272	270	281	269	308	301	283	287	285	290	280	286	281	269	268	264	268	235	242	251	264	244	251	226	220	228	216	227	210	214
	col-99(SNP)4X	No Linetype	M9	1781.25	268.294													A3	999_Free	319	312	269	250	274	268	247	254	201	249	294	295	291	288	253	271	265	254	262	238	231	273	293	316	286	307	315	313	289	320
	col-99(SNP)4X	No Linetype	14 mM Arsenite	908.182	132.465	4.49e-165	219	247										B3	999_Free	332	325	302	314	321	309	332	336	312	318	301	311	298	303	301	296	315	305	325	324	315	309	319	332	311	297	316	313	318	288
	col-99(SNP)8X	No Linetype	M9	1957.5	238.463													C3	999_Free	303	212	280	282	261	269	266	259	259	279	260	259	262	263	238	248	215	199	211	199	193	171	190	188	175	133	154	191	157	128
	col-99(SNP)8X	No Linetype	14 mM Arsenite	972.273	133.669	1.96e-129	186	209										D3	999_Free	188	243	275	281	275	276	281	244	239	245	256	234	250	234	248	239	196	205	178	179	192	186	148	133	170	134	127	139	117	104
																		E3	999_Free	295	245	280	295	273	248	235	237	245	255	255	249	229	236	225	217	217	209	182	179	185	142	154	152	150	136	136	142	92	109
																		F3	999_Free	287	243	251	277	267	254	265	249	223	252	256	255	269	252	237	211	172	197	155	174	162	154	140	125	116	103	120	121	107	76
																		G3	999_Free	294	217	236	257	276	295	257	255	235	257	260	257	253	246	244	254	217	226	197	216	192	170	165	186	185	153	178	112	138	126
																		H3	999_Free	251	237	279	280	296	283	262	256	259	260	261	272	260	253	243	238	206	227	212	171	192	170	150	162	140	153	153	152	153	132
																		A4	999_Free	270	284	281	296	315	303	313	286	323	325	303	310	313	329	331	311	313	303	307	306	330	303	313	296	316	310	302	297	312	315
																		B4	999_Free	281	273	276	284	272	286	246	275	268	304	293	308	298	319	292	299	304	307	306	310	319	322	290	310	313	303	294	308	321	314
																		C4	999_Free	267	256	283	286	281	282	258	274	251	260	232	234	224	195	231	210	216	222	199	200	183	168	162	142	122	128	139	97	91	96
																		D4	999_Free	271	273	280	305	292	288	258	281	252	262	252	238	241	235	223	235	221	239	212	250	207	211	219	205	176	184	162	169	129	135
																		E4	999_Free	292	258	290	292	284	265	268	269	260	259	237	262	244	225	222	204	219	210	219	220	208	186	175	184	198	182	143	158	146	117
																		F4	999_Free	260	251	286	285	276	272	278	296	292	278	269	273	266	272	242	252	242	228	236	234	242	206	254	246	232	229	201	204	172	220
																		G4	999_Free	284	276	279	280	296	285	278	276	270	260	270	255	265	238	225	226	218	217	206	224	205	187	215	192	201	182	203	161	159	147
																		H4	999_Free	302	272	298	305	298	292	289	255	273	266	269	248	272	255	251	265	225	225	216	223	202	213	200	198	247	166	140	157	128	158
																		A5	999_Free	335	330	345	335	335	342	339	323	330	336	331	352	337	316	318	333	327	318	337	344	332	324	318	319	325	289	293	289	290	295
																		B5	999_Free	305	233	213	229	229	228	262	264	252	229	264	236	253	250	246	258	268	226	274	272	250	233	260	261	246	241	257	269	251	242
																		C5	999_Free	300	243	261	280	254	256	250	234	244	225	245	246	252	227	236	229	220	197	192	174	158	153	183	155	132	152	159	145	126	139
																		D5	999_Free	246	210	250	295	278	283	280	257	249	249	271	250	237	248	235	217	202	202	196	220	204	200	187	199	159	171	147	168	149	158
																		E5	999_Free	183	240	258	278	266	279	260	252	242	193	208	224	243	237	210	230	214	186	210	205	191	174	179	172	152	148	154	126	154	126
																		F5	999_Free	195	248	248	257	276	294	295	284	294	277	274	285	266	256	281	237	231	246	237	234	234	242	234	230	209	189	219	210	204	181
																		G5	999_Free	191	226	264	270	267	234	254	239	249	236	232	215	248	233	223	228	182	191	196	231	187	133	149	161	134	127	170	129	161	149
																		H5	999_Free	254	221	239	262	266	244	248	209	246	210	225	226	253	222	223	204	204	215	193	166	144	160	105	163	150	117	89	150	85	63
																		A6	999_Free	251	259	246	251	242	240	261	281	279	285	260	275	278	273	262	268	253	274	258	261	254	265	263	255	261	278	296	273	272	291
																		B6	999_Free	282	279	269	288	277	296	280	297	288	276	274	276	288	285	298	282	286	292	280	277	283	283	300	281	275	286	283	291	294	292
																		C6	999_Free	248	259	279	272	268	288	264	265	275	274	289	262	257	247	264	208	240	219	217	221	210	254	215	211	208	175	151	153	131	80
																		D6	999_Free	258	258	278	273	282	281	258	288	267	293	284	270	257	249	222	230	226	264	238	245	223	208	201	209	214	195	188	149	138	160
																		E6	999_Free	247	275	286	286	275	276	284	297	266	271	277	298	254	276	235	239	227	184	191	213	208	215	223	242	197	164	133	109	99	37
																		F6	999_Free	276	262	283	256	281	289	281	293	275	274	252	244	250	262	256	231	224	232	230	234	229	215	248	235	216	199	212	180	180	165
																		G6	999_Free	249	279	285	276	270	301	294	281	295	287	284	262	279	264	263	262	242	231	212	200	209	207	211	198	190	192	184	186	192	175
																		H6	999_Free	244	242	280	271	284	293	283	304	285	283	273	279	251	248	254	238	238	236	226	245	231	234	202	201	211	216	197	222	195	157
																		A7	999_Free	0	0	0	0	0	0	0	0	0	0	0	0	0	0	0	0	0	0	0	0	0	0	0	0	0	0	0	0	0	0
																		B7	999_Free	0	0	0	0	0	0	0	0	0	0	0	0	0	0	0	0	0	0	0	0	0	0	0	0	0	0	0	0	0	0
																		C7	999_Free	0	0	0	0	0	0	0	0	0	0	0	0	0	0	0	0	0	0	0	0	0	0	0	0	0	0	0	0	0	0
																		D7	999_Free	0	0	0	0	0	0	0	0	0	0	0	0	0	0	0	0	0	0	0	0	0	0	0	0	0	0	0	0	0	0
																		E7	999_Free	0	0	0	0	0	0	0	0	0	0	0	0	0	0	0	0	0	0	0	0	0	0	0	0	0	0	0	0	0	0
																		F7	999_Free	4	2	0	0	0	0	0	0	0	0	0	0	0	0	0	0	0	0	0	0	0	0	0	0	0	0	0	0	0	0
																		G7	999_Free	0	0	0	0	0	0	0	0	0	0	0	0	0	0	0	0	0	0	0	0	0	0	0	0	0	0	0	0	0	0
																		H7	999_Free	0	0	0	0	0	0	0	0	0	0	0	0	0	0	0	0	0	0	0	0	0	0	0	0	0	0	0	0	0	0
																		A8	999_Free	0	0	0	0	0	0	0	0	0	0	0	0	0	0	0	0	0	0	0	0	0	0	0	0	0	0	0	0	0	0
																		B8	999_Free	0	1	0	0	1	0	1	1	1	0	4	1	1	0	1	0	0	0	0	0	0	0	0	0	0	0	0	0	0	0
																		C8	999_Free	0	0	0	0	0	0	0	0	0	0	0	0	0	0	0	0	0	0	0	0	0	0	0	0	0	0	0	0	0	0
																		D8	999_Free	1	0	0	0	1	0	0	0	0	0	0	0	0	0	0	0	0	0	0	0	0	0	0	0	0	0	0	0	0	0
																		E8	999_Free	3	0	0	0	0	0	0	0	0	0	0	0	0	0	0	0	0	0	0	0	0	0	0	0	0	0	0	0	0	0
																		F8	999_Free	0	0	0	0	0	0	0	0	0	0	0	0	0	0	0	0	0	0	0	0	0	0	0	0	0	0	0	0	0	0
																		G8	999_Free	0	0	0	0	0	0	0	0	0	0	0	0	0	0	0	0	0	0	0	0	0	0	0	0	0	0	0	0	0	0
																		H8	999_Free	0	0	0	0	0	0	0	0	0	0	0	0	0	0	0	0	0	0	0	0	0	0	0	0	0	0	0	0	0	0
																		A9	999_Free	3	2	1	0	1	3	1	1	0	1	1	0	2	2	3	0	1	3	2	2	1	0	2	1	0	0	0	0	0	0
																		B9	999_Free	0	0	0	0	0	0	0	0	0	0	0	0	0	0	0	0	0	0	0	0	0	0	0	0	0	0	0	0	0	0
																		C9	999_Free	0	0	0	0	0	0	0	0	0	0	0	0	0	0	0	0	0	0	0	0	0	0	0	0	0	0	0	0	0	0
																		D9	999_Free	0	0	0	0	0	0	0	0	0	0	0	0	0	0	0	0	0	0	0	0	0	0	0	0	0	0	0	0	0	0
																		E9	999_Free	0	0	0	0	0	0	0	0	0	0	0	0	0	0	0	0	0	0	0	0	0	0	0	0	0	0	0	0	0	0
																		F9	999_Free	0	0	0	0	0	0	0	0	0	0	0	0	0	0	0	0	0	0	0	0	0	0	0	0	0	0	0	0	0	0
																		G9	999_Free	0	0	0	0	0	0	0	0	0	0	0	0	0	0	0	0	0	0	0	0	0	0	0	0	0	0	0	0	0	0
																		H9	999_Free	0	0	0	0	0	0	0	0	0	0	0	0	0	0	0	0	0	0	0	0	0	0	0	0	0	0	0	0	0	0
																		A10	999_Free	0	0	0	0	0	0	0	0	0	0	0	0	0	0	0	0	0	0	0	0	0	0	0	0	0	0	0	0	0	0
																		B10	999_Free	0	0	0	0	0	0	0	0	0	0	0	0	0	0	0	0	0	0	0	0	0	0	0	0	0	0	0	0	0	0
																		C10	999_Free	0	0	0	0	0	0	0	0	0	0	0	0	0	0	0	0	0	0	0	0	0	0	0	0	0	0	0	0	0	0
																		D10	999_Free	0	0	0	0	0	0	0	0	0	0	0	0	0	0	0	0	0	0	0	0	0	0	0	0	0	0	0	0	0	0
																		E10	999_Free	0	0	0	0	0	0	0	0	0	0	0	0	0	0	0	0	0	0	0	0	0	0	0	0	0	0	0	0	0	0
																		F10	999_Free	0	0	0	0	0	0	0	0	0	0	0	0	0	0	0	0	0	0	0	0	0	0	0	0	0	0	0	0	0	0
																		G10	999_Free	0	0	0	0	0	0	0	0	0	0	0	0	0	0	0	0	0	0	0	0	0	0	0	0	0	0	0	0	0	0
																		H10	999_Free	0	0	0	0	0	0	0	0	0	0	0	0	0	0	0	0	0	0	0	0	0	0	0	0	0	0	0	0	0	0
																		A11	999_Free	0	0	0	0	0	0	0	0	0	0	0	0	0	0	0	0	0	0	0	0	0	0	0	0	0	0	0	0	0	0
																		B11	999_Free	0	0	0	0	0	0	0	0	0	0	0	0	0	0	0	0	0	0	0	0	0	0	0	0	0	0	0	0	0	0
																		C11	999_Free	0	0	0	0	0	0	0	0	0	0	0	0	0	0	0	0	0	0	0	0	0	0	0	0	0	0	0	0	0	0
																		D11	999_Free	0	0	0	0	0	0	0	0	0	0	0	0	0	0	0	0	0	0	0	0	0	0	0	0	0	0	0	0	0	0
																		E11	999_Free	0	0	0	0	0	0	0	0	0	0	0	0	0	0	0	0	0	0	0	0	0	0	0	0	0	0	0	0	0	0
																		F11	999_Free	1	0	0	0	0	0	0	0	0	0	0	0	0	0	0	0	0	0	0	0	0	0	0	0	0	0	0	0	0	0
																		G11	999_Free	0	0	0	0	0	0	0	0	0	0	0	0	0	0	0	0	0	0	0	0	0	0	0	0	0	0	0	0	0	0
																		H11	999_Free	0	0	0	0	0	0	0	0	0	0	0	0	0	0	0	0	0	0	0	0	0	0	0	0	0	0	0	0	0	0
																		A12	999_Free	0	0	0	0	0	0	0	0	0	0	0	0	0	0	0	0	0	0	0	0	0	0	0	0	0	0	0	0	0	0
																		B12	999_Free	0	1	0	0	0	0	0	0	0	0	0	0	0	0	0	0	0	0	0	0	0	0	0	0	0	0	0	0	0	0
																		C12	999_Free	0	0	0	0	0	0	0	0	0	0	0	0	0	0	0	0	0	0	0	0	0	0	0	0	0	0	0	0	0	0
																		D12	999_Free	0	0	0	0	0	0	0	0	0	0	0	0	0	0	0	0	0	0	0	0	0	0	0	0	0	0	0	0	0	0
																		E12	999_Free	0	0	0	0	0	0	0	0	0	0	0	0	0	0	0	0	0	0	0	0	0	0	0	0	0	0	0	0	0	0
																		F12	999_Free	0	0	0	0	0	0	0	0	0	0	0	0	0	0	0	0	0	0	0	0	0	0	0	0	0	0	0	0	0	0
																		G12	999_Free	0	0	0	0	0	0	0	0	0	0	0	0	0	0	0	0	0	0	0	0	0	0	0	0	0	0	0	0	0	0
																		H12	999_Free	0	0	0	0	0	0	0	0	0	0	0	0	0	0	0	0	0	0	0	0	0	0	0	0	0	0	0	0	0	0
																		<<<<<< Channel Activity >>>>>>
																		Channel	Well	Group/Time[m]	30	60	90	120	150	180	210	240	270	300	330	360	390	420	450	480	510	540	570	600	630	660	690	720	750	780	810	840	870
																		CH0	A1.0	999_Free	347	333	331	346	345	344	359	332	324	324	320	312	317	310	307	332	314	315	330	304	317	314	312	321	305	320	312	321	332
																		CH2	B1.0	999_Free	167	224	269	254	257	243	247	285	268	277	273	280	292	252	277	274	272	269	259	265	291	268	246	276	291	268	253	266	267
																		CH4	C1.0	999_Free	318	263	285	281	291	273	252	243	243	233	254	239	227	247	258	256	256	261	240	225	229	213	201	195	209	188	149	134	168
																		CH6	D1.0	999_Free	215	192	233	244	254	255	225	247	233	191	219	229	225	230	230	233	234	249	214	215	220	216	172	177	144	170	156	152	142
																		CH8	E1.0	999_Free	168	210	248	264	263	271	275	273	268	247	252	231	261	240	234	238	243	244	226	220	230	216	204	216	201	176	202	179	192
																		CH10	F1.0	999_Free	105	201	243	257	271	276	241	228	219	208	195	207	210	229	230	224	223	224	234	221	223	188	191	226	198	181	177	150	149
																		CH12	G1.0	999_Free	274	237	288	292	295	272	279	264	262	266	257	248	245	272	270	254	266	261	259	240	248	232	219	228	206	222	195	226	200
																		CH14	H1.0	999_Free	313	255	273	291	300	295	304	277	278	262	257	268	261	276	258	283	282	273	272	263	249	259	247	224	233	222	209	212	205
																		CH32	A2.0	999_Free	295	314	296	303	308	309	306	312	302	314	319	303	299	310	298	323	298	319	330	322	307	308	312	307	318	309	309	296	310
																		CH34	B2.0	999_Free	248	240	259	256	293	274	284	279	256	294	280	282	303	269	284	275	256	257	288	276	283	283	266	282	263	270	268	274	289
																		CH36	C2.0	999_Free	246	263	266	238	246	246	253	262	256	245	252	242	269	231	218	236	206	228	203	207	230	208	221	199	203	188	202	190	167
																		CH38	D2.0	999_Free	259	250	272	292	282	273	273	268	270	248	252	261	281	234	259	226	218	242	237	220	229	232	249	211	217	210	221	203	190
																		CH40	E2.0	999_Free	266	277	272	268	263	266	291	276	276	289	266	247	262	254	279	265	253	235	222	232	228	225	208	219	188	241	220	209	232
																		CH42	F2.0	999_Free	260	265	272	284	290	287	291	291	298	294	273	270	279	283	257	275	265	252	232	239	222	226	234	231	217	228	225	222	215
																		CH44	G2.0	999_Free	209	248	284	308	277	291	287	279	266	278	274	252	265	283	245	249	265	256	252	222	256	251	218	233	213	190	219	208	196
																		CH46	H2.0	999_Free	272	270	281	269	308	301	283	287	285	290	280	286	281	269	268	264	268	235	242	251	264	244	251	226	220	228	216	227	210
																		CH64	A3.0	999_Free	319	312	269	250	274	268	247	254	201	249	294	295	291	288	253	271	265	254	262	238	231	273	293	316	286	307	315	313	289
																		CH66	B3.0	999_Free	332	325	302	314	321	309	332	336	312	318	301	311	298	303	301	296	315	305	325	324	315	309	319	332	311	297	316	313	318
																		CH68	C3.0	999_Free	303	212	280	282	261	269	266	259	259	279	260	259	262	263	238	248	215	199	211	199	193	171	190	188	175	133	154	191	157
																		CH70	D3.0	999_Free	188	243	275	281	275	276	281	244	239	245	256	234	250	234	248	239	196	205	178	179	192	186	148	133	170	134	127	139	117
																		CH72	E3.0	999_Free	295	245	280	295	273	248	235	237	245	255	255	249	229	236	225	217	217	209	182	179	185	142	154	152	150	136	136	142	92
																		CH74	F3.0	999_Free	287	243	251	277	267	254	265	249	223	252	256	255	269	252	237	211	172	197	155	174	162	154	140	125	116	103	120	121	107
																		CH76	G3.0	999_Free	294	217	236	257	276	295	257	255	235	257	260	257	253	246	244	254	217	226	197	216	192	170	165	186	185	153	178	112	138
																		CH78	H3.0	999_Free	251	237	279	280	296	283	262	256	259	260	261	272	260	253	243	238	206	227	212	171	192	170	150	162	140	153	153	152	153
																		CH96	A4.0	999_Free	270	284	281	296	315	303	313	286	323	325	303	310	313	329	331	311	313	303	307	306	330	303	313	296	316	310	302	297	312
																		CH98	B4.0	999_Free	281	273	276	284	272	286	246	275	268	304	293	308	298	319	292	299	304	307	306	310	319	322	290	310	313	303	294	308	321
																		CH100	C4.0	999_Free	267	256	283	286	281	282	258	274	251	260	232	234	224	195	231	210	216	222	199	200	183	168	162	142	122	128	139	97	91
																		CH102	D4.0	999_Free	271	273	280	305	292	288	258	281	252	262	252	238	241	235	223	235	221	239	212	250	207	211	219	205	176	184	162	169	129
																		CH104	E4.0	999_Free	292	258	290	292	284	265	268	269	260	259	237	262	244	225	222	204	219	210	219	220	208	186	175	184	198	182	143	158	146
																		CH106	F4.0	999_Free	260	251	286	285	276	272	278	296	292	278	269	273	266	272	242	252	242	228	236	234	242	206	254	246	232	229	201	204	172
																		CH108	G4.0	999_Free	284	276	279	280	296	285	278	276	270	260	270	255	265	238	225	226	218	217	206	224	205	187	215	192	201	182	203	161	159
																		CH110	H4.0	999_Free	302	272	298	305	298	292	289	255	273	266	269	248	272	255	251	265	225	225	216	223	202	213	200	198	247	166	140	157	128
																		CH128	A5.0	999_Free	335	330	345	335	335	342	339	323	330	336	331	352	337	316	318	333	327	318	337	344	332	324	318	319	325	289	293	289	290
																		CH130	B5.0	999_Free	305	233	213	229	229	228	262	264	252	229	264	236	253	250	246	258	268	226	274	272	250	233	260	261	246	241	257	269	251
																		CH132	C5.0	999_Free	300	243	261	280	254	256	250	234	244	225	245	246	252	227	236	229	220	197	192	174	158	153	183	155	132	152	159	145	126
																		CH134	D5.0	999_Free	246	210	250	295	278	283	280	257	249	249	271	250	237	248	235	217	202	202	196	220	204	200	187	199	159	171	147	168	149
																		CH136	E5.0	999_Free	183	240	258	278	266	279	260	252	242	193	208	224	243	237	210	230	214	186	210	205	191	174	179	172	152	148	154	126	154
																		CH138	F5.0	999_Free	195	248	248	257	276	294	295	284	294	277	274	285	266	256	281	237	231	246	237	234	234	242	234	230	209	189	219	210	204
																		CH140	G5.0	999_Free	191	226	264	270	267	234	254	239	249	236	232	215	248	233	223	228	182	191	196	231	187	133	149	161	134	127	170	129	161
																		CH142	H5.0	999_Free	254	221	239	262	266	244	248	209	246	210	225	226	253	222	223	204	204	215	193	166	144	160	105	163	150	117	89	150	85
																		CH160	A6.0	999_Free	251	259	246	251	242	240	261	281	279	285	260	275	278	273	262	268	253	274	258	261	254	265	263	255	261	278	296	273	272
																		CH162	B6.0	999_Free	282	279	269	288	277	296	280	297	288	276	274	276	288	285	298	282	286	292	280	277	283	283	300	281	275	286	283	291	294
																		CH164	C6.0	999_Free	248	259	279	272	268	288	264	265	275	274	289	262	257	247	264	208	240	219	217	221	210	254	215	211	208	175	151	153	131
																		CH166	D6.0	999_Free	258	258	278	273	282	281	258	288	267	293	284	270	257	249	222	230	226	264	238	245	223	208	201	209	214	195	188	149	138
																		CH168	E6.0	999_Free	247	275	286	286	275	276	284	297	266	271	277	298	254	276	235	239	227	184	191	213	208	215	223	242	197	164	133	109	99
																		CH170	F6.0	999_Free	276	262	283	256	281	289	281	293	275	274	252	244	250	262	256	231	224	232	230	234	229	215	248	235	216	199	212	180	180
																		CH172	G6.0	999_Free	249	279	285	276	270	301	294	281	295	287	284	262	279	264	263	262	242	231	212	200	209	207	211	198	190	192	184	186	192
																		CH174	H6.0	999_Free	244	242	280	271	284	293	283	304	285	283	273	279	251	248	254	238	238	236	226	245	231	234	202	201	211	216	197	222	195
																		CH192	A7.0	999_Free	0	0	0	0	0	0	0	0	0	0	0	0	0	0	0	0	0	0	0	0	0	0	0	0	0	0	0	0	0
																		CH194	B7.0	999_Free	0	0	0	0	0	0	0	0	0	0	0	0	0	0	0	0	0	0	0	0	0	0	0	0	0	0	0	0	0
																		CH196	C7.0	999_Free	0	0	0	0	0	0	0	0	0	0	0	0	0	0	0	0	0	0	0	0	0	0	0	0	0	0	0	0	0
																		CH198	D7.0	999_Free	0	0	0	0	0	0	0	0	0	0	0	0	0	0	0	0	0	0	0	0	0	0	0	0	0	0	0	0	0
																		CH200	E7.0	999_Free	0	0	0	0	0	0	0	0	0	0	0	0	0	0	0	0	0	0	0	0	0	0	0	0	0	0	0	0	0
																		CH202	F7.0	999_Free	4	2	0	0	0	0	0	0	0	0	0	0	0	0	0	0	0	0	0	0	0	0	0	0	0	0	0	0	0
																		CH204	G7.0	999_Free	0	0	0	0	0	0	0	0	0	0	0	0	0	0	0	0	0	0	0	0	0	0	0	0	0	0	0	0	0
																		CH206	H7.0	999_Free	0	0	0	0	0	0	0	0	0	0	0	0	0	0	0	0	0	0	0	0	0	0	0	0	0	0	0	0	0
																		CH224	A8.0	999_Free	0	0	0	0	0	0	0	0	0	0	0	0	0	0	0	0	0	0	0	0	0	0	0	0	0	0	0	0	0
																		CH226	B8.0	999_Free	0	1	0	0	1	0	1	1	1	0	4	1	1	0	1	0	0	0	0	0	0	0	0	0	0	0	0	0	0
																		CH228	C8.0	999_Free	0	0	0	0	0	0	0	0	0	0	0	0	0	0	0	0	0	0	0	0	0	0	0	0	0	0	0	0	0
																		CH230	D8.0	999_Free	1	0	0	0	1	0	0	0	0	0	0	0	0	0	0	0	0	0	0	0	0	0	0	0	0	0	0	0	0
																		CH232	E8.0	999_Free	3	0	0	0	0	0	0	0	0	0	0	0	0	0	0	0	0	0	0	0	0	0	0	0	0	0	0	0	0
																		CH234	F8.0	999_Free	0	0	0	0	0	0	0	0	0	0	0	0	0	0	0	0	0	0	0	0	0	0	0	0	0	0	0	0	0
																		CH236	G8.0	999_Free	0	0	0	0	0	0	0	0	0	0	0	0	0	0	0	0	0	0	0	0	0	0	0	0	0	0	0	0	0
																		CH238	H8.0	999_Free	0	0	0	0	0	0	0	0	0	0	0	0	0	0	0	0	0	0	0	0	0	0	0	0	0	0	0	0	0
																		CH256	A9.0	999_Free	3	2	1	0	1	3	1	1	0	1	1	0	2	2	3	0	1	3	2	2	1	0	2	1	0	0	0	0	0
																		CH258	B9.0	999_Free	0	0	0	0	0	0	0	0	0	0	0	0	0	0	0	0	0	0	0	0	0	0	0	0	0	0	0	0	0
																		CH260	C9.0	999_Free	0	0	0	0	0	0	0	0	0	0	0	0	0	0	0	0	0	0	0	0	0	0	0	0	0	0	0	0	0
																		CH262	D9.0	999_Free	0	0	0	0	0	0	0	0	0	0	0	0	0	0	0	0	0	0	0	0	0	0	0	0	0	0	0	0	0
																		CH264	E9.0	999_Free	0	0	0	0	0	0	0	0	0	0	0	0	0	0	0	0	0	0	0	0	0	0	0	0	0	0	0	0	0
																		CH266	F9.0	999_Free	0	0	0	0	0	0	0	0	0	0	0	0	0	0	0	0	0	0	0	0	0	0	0	0	0	0	0	0	0
																		CH268	G9.0	999_Free	0	0	0	0	0	0	0	0	0	0	0	0	0	0	0	0	0	0	0	0	0	0	0	0	0	0	0	0	0
																		CH270	H9.0	999_Free	0	0	0	0	0	0	0	0	0	0	0	0	0	0	0	0	0	0	0	0	0	0	0	0	0	0	0	0	0
																		CH288	A10.0	999_Free	0	0	0	0	0	0	0	0	0	0	0	0	0	0	0	0	0	0	0	0	0	0	0	0	0	0	0	0	0
																		CH290	B10.0	999_Free	0	0	0	0	0	0	0	0	0	0	0	0	0	0	0	0	0	0	0	0	0	0	0	0	0	0	0	0	0
																		CH292	C10.0	999_Free	0	0	0	0	0	0	0	0	0	0	0	0	0	0	0	0	0	0	0	0	0	0	0	0	0	0	0	0	0
																		CH294	D10.0	999_Free	0	0	0	0	0	0	0	0	0	0	0	0	0	0	0	0	0	0	0	0	0	0	0	0	0	0	0	0	0
																		CH296	E10.0	999_Free	0	0	0	0	0	0	0	0	0	0	0	0	0	0	0	0	0	0	0	0	0	0	0	0	0	0	0	0	0
																		CH298	F10.0	999_Free	0	0	0	0	0	0	0	0	0	0	0	0	0	0	0	0	0	0	0	0	0	0	0	0	0	0	0	0	0
																		CH300	G10.0	999_Free	0	0	0	0	0	0	0	0	0	0	0	0	0	0	0	0	0	0	0	0	0	0	0	0	0	0	0	0	0
																		CH302	H10.0	999_Free	0	0	0	0	0	0	0	0	0	0	0	0	0	0	0	0	0	0	0	0	0	0	0	0	0	0	0	0	0
																		CH320	A11.0	999_Free	0	0	0	0	0	0	0	0	0	0	0	0	0	0	0	0	0	0	0	0	0	0	0	0	0	0	0	0	0
																		CH322	B11.0	999_Free	0	0	0	0	0	0	0	0	0	0	0	0	0	0	0	0	0	0	0	0	0	0	0	0	0	0	0	0	0
																		CH324	C11.0	999_Free	0	0	0	0	0	0	0	0	0	0	0	0	0	0	0	0	0	0	0	0	0	0	0	0	0	0	0	0	0
																		CH326	D11.0	999_Free	0	0	0	0	0	0	0	0	0	0	0	0	0	0	0	0	0	0	0	0	0	0	0	0	0	0	0	0	0
																		CH328	E11.0	999_Free	0	0	0	0	0	0	0	0	0	0	0	0	0	0	0	0	0	0	0	0	0	0	0	0	0	0	0	0	0
																		CH330	F11.0	999_Free	1	0	0	0	0	0	0	0	0	0	0	0	0	0	0	0	0	0	0	0	0	0	0	0	0	0	0	0	0
																		CH332	G11.0	999_Free	0	0	0	0	0	0	0	0	0	0	0	0	0	0	0	0	0	0	0	0	0	0	0	0	0	0	0	0	0
																		CH334	H11.0	999_Free	0	0	0	0	0	0	0	0	0	0	0	0	0	0	0	0	0	0	0	0	0	0	0	0	0	0	0	0	0
																		CH352	A12.0	999_Free	0	0	0	0	0	0	0	0	0	0	0	0	0	0	0	0	0	0	0	0	0	0	0	0	0	0	0	0	0
																		CH354	B12.0	999_Free	0	1	0	0	0	0	0	0	0	0	0	0	0	0	0	0	0	0	0	0	0	0	0	0	0	0	0	0	0
																		CH356	C12.0	999_Free	0	0	0	0	0	0	0	0	0	0	0	0	0	0	0	0	0	0	0	0	0	0	0	0	0	0	0	0	0
																		CH358	D12.0	999_Free	0	0	0	0	0	0	0	0	0	0	0	0	0	0	0	0	0	0	0	0	0	0	0	0	0	0	0	0	0
																		CH360	E12.0	999_Free	0	0	0	0	0	0	0	0	0	0	0	0	0	0	0	0	0	0	0	0	0	0	0	0	0	0	0	0	0
																		CH362	F12.0	999_Free	0	0	0	0	0	0	0	0	0	0	0	0	0	0	0	0	0	0	0	0	0	0	0	0	0	0	0	0	0
																		CH364	G12.0	999_Free	0	0	0	0	0	0	0	0	0	0	0	0	0	0	0	0	0	0	0	0	0	0	0	0	0	0	0	0	0
																		CH366	H12.0	999_Free	0	0	0	0	0	0	0	0	0	0	0	0	0	0	0	0	0	0	0	0	0	0	0	0	0	0	0	0	0
[truncated: 71 more columns]

## Sheet: Heat Stress Assay_Fig S1F
Note: col-99 is col-99(gk694263[S106L])
TRIAL #1																						TRIAL #1
																						Device	Experiment	Plate Name	Animal Description	Plate Position Name	Plate Row	Plate Column	Plate Center Position X (inches)	Plate Center Position Y (inches)	Plate Size X (inches)	Plate Size Y (inches)	Strain	Genotype	Condition 1	Condition 2	Condition 3	Culturing Temperature	Experiment Temperature	Food Source	Environmental Conditions	Incubator Name	Incubator Column	Incubator Shelf	Censored	Excluded	Special Flag	Size of by-hand annotated cluster	Machine Fast Movement Cessation Age (Days)
																						Earendil	20210719_AHS1_WT	Earendil_b::0	col9910X::OP50::20::heat_stress	b::0	0	b	5.21562	1.13594	2.0125	1.98438	col9910X		OP50			20	32		heat_stress				0	1		0	0.017847
																						Earendil	20210719_AHS1_WT	Earendil_b::0	col9910X::OP50::20::heat_stress	b::0	0	b	5.21562	1.13594	2.0125	1.98438	col9910X		OP50			20	32		heat_stress				0	1		0	0.017847
																						Earendil	20210719_AHS1_WT	Earendil_b::0	col9910X::OP50::20::heat_stress	b::0	0	b	5.21562	1.13594	2.0125	1.98438	col9910X		OP50			20	32		heat_stress				0	1		0	0.017847
																						Earendil	20210719_AHS1_WT	Earendil_b::0	col9910X::OP50::20::heat_stress	b::0	0	b	5.21562	1.13594	2.0125	1.98438	col9910X		OP50			20	32		heat_stress				0	1		0	-0.002986
																						Earendil	20210719_AHS1_WT	Earendil_b::0	col9910X::OP50::20::heat_stress	b::0	0	b	5.21562	1.13594	2.0125	1.98438	col9910X		OP50			20	32		heat_stress				0	1		0	-0.002986
																						Earendil	20210719_AHS1_WT	Earendil_b::0	col9910X::OP50::20::heat_stress	b::0	0	b	5.21562	1.13594	2.0125	1.98438	col9910X		OP50			20	32		heat_stress				0	1		0	-0.002986
																						Earendil	20210719_AHS1_WT	Earendil_b::0	col9910X::OP50::20::heat_stress	b::0	0	b	5.21562	1.13594	2.0125	1.98438	col9910X		OP50			20	32		heat_stress				0	0		0	0.101181
																						Earendil	20210719_AHS1_WT	Earendil_b::0	col9910X::OP50::20::heat_stress	b::0	0	b	5.21562	1.13594	2.0125	1.98438	col9910X		OP50			20	32		heat_stress				0	1		0	0.601181
																						Earendil	20210719_AHS1_WT	Earendil_b::0	col9910X::OP50::20::heat_stress	b::0	0	b	5.21562	1.13594	2.0125	1.98438	col9910X		OP50			20	32		heat_stress				0	1		0	-0.002986
																						Earendil	20210719_AHS1_WT	Earendil_b::0	col9910X::OP50::20::heat_stress	b::0	0	b	5.21562	1.13594	2.0125	1.98438	col9910X		OP50			20	32		heat_stress				0	0		0	0.517847
																						Earendil	20210719_AHS1_WT	Earendil_b::0	col9910X::OP50::20::heat_stress	b::0	0	b	5.21562	1.13594	2.0125	1.98438	col9910X		OP50			20	32		heat_stress				0	1	Extra worm from multiple-worm disambiguation	0	0.017847
																						Earendil	20210719_AHS1_WT	Earendil_b::0	col9910X::OP50::20::heat_stress	b::0	0	b	5.21562	1.13594	2.0125	1.98438	col9910X		OP50			20	32		heat_stress				0	0		0	0.684514
																						Earendil	20210719_AHS1_WT	Earendil_b::0	col9910X::OP50::20::heat_stress	b::0	0	b	5.21562	1.13594	2.0125	1.98438	col9910X		OP50			20	32		heat_stress				0	1		0	0.309514
																						Earendil	20210719_AHS1_WT	Earendil_b::0	col9910X::OP50::20::heat_stress	b::0	0	b	5.21562	1.13594	2.0125	1.98438	col9910X		OP50			20	32		heat_stress				0	1		0	0.684514
																						Earendil	20210719_AHS1_WT	Earendil_b::0	col9910X::OP50::20::heat_stress	b::0	0	b	5.21562	1.13594	2.0125	1.98438	col9910X		OP50			20	32		heat_stress				0	1		0	0.059514
																						Earendil	20210719_AHS1_WT	Earendil_b::0	col9910X::OP50::20::heat_stress	b::0	0	b	5.21562	1.13594	2.0125	1.98438	col9910X		OP50			20	32		heat_stress				0	1		0	-0.002986
																						Earendil	20210719_AHS1_WT	Earendil_b::0	col9910X::OP50::20::heat_stress	b::0	0	b	5.21562	1.13594	2.0125	1.98438	col9910X		OP50			20	32		heat_stress				0	1		0	0.017847
																						Earendil	20210719_AHS1_WT	Earendil_b::0	col9910X::OP50::20::heat_stress	b::0	0	b	5.21562	1.13594	2.0125	1.98438	col9910X		OP50			20	32		heat_stress				0	1		0	-0.002986
																						Earendil	20210719_AHS1_WT	Earendil_b::0	col9910X::OP50::20::heat_stress	b::0	0	b	5.21562	1.13594	2.0125	1.98438	col9910X		OP50			20	32		heat_stress				0	1		0	0.017847
																						Earendil	20210719_AHS1_WT	Earendil_b::0	col9910X::OP50::20::heat_stress	b::0	0	b	5.21562	1.13594	2.0125	1.98438	col9910X		OP50			20	32		heat_stress				0	1		0	0.059514
																						Earendil	20210719_AHS1_WT	Earendil_b::0	col9910X::OP50::20::heat_stress	b::0	0	b	5.21562	1.13594	2.0125	1.98438	col9910X		OP50			20	32		heat_stress				0	1		0	0.184514
																						Earendil	20210719_AHS1_WT	Earendil_b::0	col9910X::OP50::20::heat_stress	b::0	0	b	5.21562	1.13594	2.0125	1.98438	col9910X		OP50			20	32		heat_stress				0	1		0	-0.002986
																						Earendil	20210719_AHS1_WT	Earendil_b::0	col9910X::OP50::20::heat_stress	b::0	0	b	5.21562	1.13594	2.0125	1.98438	col9910X		OP50			20	32		heat_stress				0	1		0	0.476181
																						Earendil	20210719_AHS1_WT	Earendil_b::0	col9910X::OP50::20::heat_stress	b::0	0	b	5.21562	1.13594	2.0125	1.98438	col9910X		OP50			20	32		heat_stress				0	1		0	0.017847
																						Earendil	20210719_AHS1_WT	Earendil_b::0	col9910X::OP50::20::heat_stress	b::0	0	b	5.21562	1.13594	2.0125	1.98438	col9910X		OP50			20	32		heat_stress				0	0		0	0.809514
																						Earendil	20210719_AHS1_WT	Earendil_b::0	col9910X::OP50::20::heat_stress	b::0	0	b	5.21562	1.13594	2.0125	1.98438	col9910X		OP50			20	32		heat_stress				0	1		0	0.017847
																						Earendil	20210719_AHS1_WT	Earendil_b::0	col9910X::OP50::20::heat_stress	b::0	0	b	5.21562	1.13594	2.0125	1.98438	col9910X		OP50			20	32		heat_stress				0	1		0	-0.002986
																						Earendil	20210719_AHS1_WT	Earendil_b::0	col9910X::OP50::20::heat_stress	b::0	0	b	5.21562	1.13594	2.0125	1.98438	col9910X		OP50			20	32		heat_stress				0	0		0	0.142847
																						Earendil	20210719_AHS1_WT	Earendil_b::0	col9910X::OP50::20::heat_stress	b::0	0	b	5.21562	1.13594	2.0125	1.98438	col9910X		OP50			20	32		heat_stress				0	0		0	0.559514
																						Earendil	20210719_AHS1_WT	Earendil_b::0	col9910X::OP50::20::heat_stress	b::0	0	b	5.21562	1.13594	2.0125	1.98438	col9910X		OP50			20	32		heat_stress				0	0		0	0.434514
TRIAL #2																						Earendil	20210719_AHS1_WT	Earendil_b::0	col9910X::OP50::20::heat_stress	b::0	0	b	5.21562	1.13594	2.0125	1.98438	col9910X		OP50			20	32		heat_stress				0	0		0	0.559514
																						Earendil	20210719_AHS1_WT	Earendil_b::0	col9910X::OP50::20::heat_stress	b::0	0	b	5.21562	1.13594	2.0125	1.98438	col9910X		OP50			20	32		heat_stress				0	1		0	0.559514
																						Earendil	20210719_AHS1_WT	Earendil_b::0	col9910X::OP50::20::heat_stress	b::0	0	b	5.21562	1.13594	2.0125	1.98438	col9910X		OP50			20	32		heat_stress				0	0		0	0.517847
																						Earendil	20210719_AHS1_WT	Earendil_b::0	col9910X::OP50::20::heat_stress	b::0	0	b	5.21562	1.13594	2.0125	1.98438	col9910X		OP50			20	32		heat_stress				0	1		0	-0.002986
																						Earendil	20210719_AHS1_WT	Earendil_b::0	col9910X::OP50::20::heat_stress	b::0	0	b	5.21562	1.13594	2.0125	1.98438	col9910X		OP50			20	32		heat_stress				0	1		0	-0.002986
																						Earendil	20210719_AHS1_WT	Earendil_b::0	col9910X::OP50::20::heat_stress	b::0	0	b	5.21562	1.13594	2.0125	1.98438	col9910X		OP50			20	32		heat_stress				0	0		0	0.059514
																						Earendil	20210719_AHS1_WT	Earendil_b::0	col9910X::OP50::20::heat_stress	b::0	0	b	5.21562	1.13594	2.0125	1.98438	col9910X		OP50			20	32		heat_stress				0	0		0	0.392847
																						Earendil	20210719_AHS1_WT	Earendil_b::0	col9910X::OP50::20::heat_stress	b::0	0	b	5.21562	1.13594	2.0125	1.98438	col9910X		OP50			20	32		heat_stress				0	1		0	0.101181
																						Earendil	20210719_AHS1_WT	Earendil_b::0	col9910X::OP50::20::heat_stress	b::0	0	b	5.21562	1.13594	2.0125	1.98438	col9910X		OP50			20	32		heat_stress				0	0		0	0.059514
																						Earendil	20210719_AHS1_WT	Earendil_b::0	col9910X::OP50::20::heat_stress	b::0	0	b	5.21562	1.13594	2.0125	1.98438	col9910X		OP50			20	32		heat_stress				0	0		0	0.351181
																						Earendil	20210719_AHS1_WT	Earendil_b::0	col9910X::OP50::20::heat_stress	b::0	0	b	5.21562	1.13594	2.0125	1.98438	col9910X		OP50			20	32		heat_stress				0	0		0	0.017847
																						Earendil	20210719_AHS1_WT	Earendil_b::0	col9910X::OP50::20::heat_stress	b::0	0	b	5.21562	1.13594	2.0125	1.98438	col9910X		OP50			20	32		heat_stress				0	0		0	0.226181
																						Earendil	20210719_AHS1_WT	Earendil_b::0	col9910X::OP50::20::heat_stress	b::0	0	b	5.21562	1.13594	2.0125	1.98438	col9910X		OP50			20	32		heat_stress				0	0		0	0.309514
																						Earendil	20210719_AHS1_WT	Earendil_b::0	col9910X::OP50::20::heat_stress	b::0	0	b	5.21562	1.13594	2.0125	1.98438	col9910X		OP50			20	32		heat_stress				0	0		0	0.226181
																						Earendil	20210719_AHS1_WT	Earendil_b::0	col9910X::OP50::20::heat_stress	b::0	0	b	5.21562	1.13594	2.0125	1.98438	col9910X		OP50			20	32		heat_stress				0	0		0	0.267847
																						Earendil	20210719_AHS1_WT	Earendil_b::0	col9910X::OP50::20::heat_stress	b::0	0	b	5.21562	1.13594	2.0125	1.98438	col9910X		OP50			20	32		heat_stress				0	1	Extra worm from multiple-worm disambiguation	0	0.267847
																						Earendil	20210719_AHS1_WT	Earendil_b::0	col9910X::OP50::20::heat_stress	b::0	0	b	5.21562	1.13594	2.0125	1.98438	col9910X		OP50			20	32		heat_stress				0	1		0	0.267847
																						Earendil	20210719_AHS1_WT	Earendil_b::0	col9910X::OP50::20::heat_stress	b::0	0	b	5.21562	1.13594	2.0125	1.98438	col9910X		OP50			20	32		heat_stress				0	1		0	0.184514
																						Earendil	20210719_AHS1_WT	Earendil_b::0	col9910X::OP50::20::heat_stress	b::0	0	b	5.21562	1.13594	2.0125	1.98438	col9910X		OP50			20	32		heat_stress				0	1		0	0.101181
																						Earendil	20210719_AHS1_WT	Earendil_b::0	col9910X::OP50::20::heat_stress	b::0	0	b	5.21562	1.13594	2.0125	1.98438	col9910X		OP50			20	32		heat_stress				0	1		0	0.059514
																						Earendil	20210719_AHS1_WT	Earendil_b::0	col9910X::OP50::20::heat_stress	b::0	0	b	5.21562	1.13594	2.0125	1.98438	col9910X		OP50			20	32		heat_stress				0	0		0	0.184514
																						Earendil	20210719_AHS1_WT	Earendil_b::0	col9910X::OP50::20::heat_stress	b::0	0	b	5.21562	1.13594	2.0125	1.98438	col9910X		OP50			20	32		heat_stress				0	0		0	0.101181
																						Earendil	20210719_AHS1_WT	Earendil_b::0	col9910X::OP50::20::heat_stress	b::0	0	b	5.21562	1.13594	2.0125	1.98438	col9910X		OP50			20	32		heat_stress				0	1		0	0.017847
																						Earendil	20210719_AHS1_WT	Earendil_b::0	col9910X::OP50::20::heat_stress	b::0	0	b	5.21562	1.13594	2.0125	1.98438	col9910X		OP50			20	32		heat_stress				0	1		0	-0.002986
																						Earendil	20210719_AHS1_WT	Earendil_b::0	col9910X::OP50::20::heat_stress	b::0	0	b	5.21562	1.13594	2.0125	1.98438	col9910X		OP50			20	32		heat_stress				0	1		0	-0.002986
																						Earendil	20210719_AHS1_WT	Earendil_b::0	col9910X::OP50::20::heat_stress	b::0	0	b	5.21562	1.13594	2.0125	1.98438	col9910X		OP50			20	32		heat_stress				0	0		0	0.059514
																						Earendil	20210719_AHS1_WT	Earendil_b::0	col9910X::OP50::20::heat_stress	b::0	0	b	5.21562	1.13594	2.0125	1.98438	col9910X		OP50			20	32		heat_stress				0	0		0	-0.002986
																						Earendil	20210719_AHS1_WT	Earendil_b::0	col9910X::OP50::20::heat_stress	b::0	0	b	5.21562	1.13594	2.0125	1.98438	col9910X		OP50			20	32		heat_stress				0	0		0	0.017847
																						Earendil	20210719_AHS1_WT	Earendil_b::0	col9910X::OP50::20::heat_stress	b::0	0	b	5.21562	1.13594	2.0125	1.98438	col9910X		OP50			20	32		heat_stress				0	1		0	-0.002986
																						Earendil	20210719_AHS1_WT	Earendil_b::0	col9910X::OP50::20::heat_stress	b::0	0	b	5.21562	1.13594	2.0125	1.98438	col9910X		OP50			20	32		heat_stress				0	0		0	0.059514
																						Earendil	20210719_AHS1_WT	Earendil_b::0	col9910X::OP50::20::heat_stress	b::0	0	b	5.21562	1.13594	2.0125	1.98438	col9910X		OP50			20	32		heat_stress				0	0		0	0.017847
																						Earendil	20210719_AHS1_WT	Earendil_b::0	col9910X::OP50::20::heat_stress	b::0	0	b	5.21562	1.13594	2.0125	1.98438	col9910X		OP50			20	32		heat_stress				0	0		0	-0.002986
																						Earendil	20210719_AHS1_WT	Earendil_b::0	col9910X::OP50::20::heat_stress	b::0	0	b	5.21562	1.13594	2.0125	1.98438	col9910X		OP50			20	32		heat_stress				0	0		0	-0.002986
																						Earendil	20210719_AHS1_WT	Earendil_b::0	col9910X::OP50::20::heat_stress	b::0	0	b	5.21562	1.13594	2.0125	1.98438	col9910X		OP50			20	32		heat_stress				0	1		0	-0.002986
																						Earendil	20210719_AHS1_WT	Earendil_b::0	col9910X::OP50::20::heat_stress	b::0	0	b	5.21562	1.13594	2.0125	1.98438	col9910X		OP50			20	32		heat_stress				0	1		0	-0.002986
																						Earendil	20210719_AHS1_WT	Earendil_b::0	col9910X::OP50::20::heat_stress	b::0	0	b	5.21562	1.13594	2.0125	1.98438	col9910X		OP50			20	32		heat_stress				0	0		0	0.059514
																						Earendil	20210719_AHS1_WT	Earendil_b::0	col9910X::OP50::20::heat_stress	b::0	0	b	5.21562	1.13594	2.0125	1.98438	col9910X		OP50			20	32		heat_stress				0	1		0	0.017847
																						Earendil	20210719_AHS1_WT	Earendil_b::0	col9910X::OP50::20::heat_stress	b::0	0	b	5.21562	1.13594	2.0125	1.98438	col9910X		OP50			20	32		heat_stress				0	1		0	-0.002986
																						Earendil	20210719_AHS1_WT	Earendil_b::0	col9910X::OP50::20::heat_stress	b::0	0	b	5.21562	1.13594	2.0125	1.98438	col9910X		OP50			20	32		heat_stress				0	1		0	-0.002986
																						Earendil	20210719_AHS1_WT	Earendil_b::0	col9910X::OP50::20::heat_stress	b::0	0	b	5.21562	1.13594	2.0125	1.98438	col9910X		OP50			20	32		heat_stress				0	1		0	-0.002986
TRIAL #3																						Earendil	20210719_AHS1_WT	Earendil_b::0	col9910X::OP50::20::heat_stress	b::0	0	b	5.21562	1.13594	2.0125	1.98438	col9910X		OP50			20	32		heat_stress				0	1		0	-0.002986
																						Earendil	20210719_AHS1_WT	Earendil_b::0	col9910X::OP50::20::heat_stress	b::0	0	b	5.21562	1.13594	2.0125	1.98438	col9910X		OP50			20	32		heat_stress				0	1		0	-0.002986
																						Earendil	20210719_AHS1_WT	Earendil_b::0	col9910X::OP50::20::heat_stress	b::0	0	b	5.21562	1.13594	2.0125	1.98438	col9910X		OP50			20	32		heat_stress				0	1		0	-0.002986
																						Earendil	20210719_AHS1_WT	Earendil_b::0	col9910X::OP50::20::heat_stress	b::0	0	b	5.21562	1.13594	2.0125	1.98438	col9910X		OP50			20	32		heat_stress				0	1		0	-0.002986
																						Earendil	20210719_AHS1_WT	Earendil_b::0	col9910X::OP50::20::heat_stress	b::0	0	b	5.21562	1.13594	2.0125	1.98438	col9910X		OP50			20	32		heat_stress				0	1		0	-0.002986
																						Earendil	20210719_AHS1_WT	Earendil_b::0	col9910X::OP50::20::heat_stress	b::0	0	b	5.21562	1.13594	2.0125	1.98438	col9910X		OP50			20	32		heat_stress				0	1		0	-0.002986
																						Earendil	20210719_AHS1_WT	Earendil_b::0	col9910X::OP50::20::heat_stress	b::0	0	b	5.21562	1.13594	2.0125	1.98438	col9910X		OP50			20	32		heat_stress				0	1		0	-0.002986
																						Earendil	20210719_AHS1_WT	Earendil_b::0	col9910X::OP50::20::heat_stress	b::0	0	b	5.21562	1.13594	2.0125	1.98438	col9910X		OP50			20	32		heat_stress				0	0		0	0.017847
																						Earendil	20210719_AHS1_WT	Earendil_b::0	col9910X::OP50::20::heat_stress	b::0	0	b	5.21562	1.13594	2.0125	1.98438	col9910X		OP50			20	32		heat_stress				0	1		0	-0.002986
																						Earendil	20210719_AHS1_WT	Earendil_b::0	col9910X::OP50::20::heat_stress	b::0	0	b	5.21562	1.13594	2.0125	1.98438	col9910X		OP50			20	32		heat_stress				0	1	Extra worm from multiple-worm disambiguation	0	-0.002986
																						Earendil	20210719_AHS1_WT	Earendil_b::0	col9910X::OP50::20::heat_stress	b::0	0	b	5.21562	1.13594	2.0125	1.98438	col9910X		OP50			20	32		heat_stress				0	1		0	0.101181
																						Earendil	20210719_AHS1_WT	Earendil_b::0	col9910X::OP50::20::heat_stress	b::0	0	b	5.21562	1.13594	2.0125	1.98438	col9910X		OP50			20	32		heat_stress				0	1		0	-0.002986
																						Earendil	20210719_AHS1_WT	Earendil_b::0	col9910X::OP50::20::heat_stress	b::0	0	b	5.21562	1.13594	2.0125	1.98438	col9910X		OP50			20	32		heat_stress				0	1		0	0.059514
																						Earendil	20210719_AHS1_WT	Earendil_b::0	col9910X::OP50::20::heat_stress	b::0	0	b	5.21562	1.13594	2.0125	1.98438	col9910X		OP50			20	32		heat_stress				0	1		0	0.017847
																						Earendil	20210719_AHS1_WT	Earendil_b::0	col9910X::OP50::20::heat_stress	b::0	0	b	5.21562	1.13594	2.0125	1.98438	col9910X		OP50			20	32		heat_stress				0	1		0	-0.002986
																						Earendil	20210719_AHS1_WT	Earendil_b::0	col9910X::OP50::20::heat_stress	b::0	0	b	5.21562	1.13594	2.0125	1.98438	col9910X		OP50			20	32		heat_stress				0	1		0	-0.002986
																						Earendil	20210719_AHS1_WT	Earendil_b::0	col9910X::OP50::20::heat_stress	b::0	0	b	5.21562	1.13594	2.0125	1.98438	col9910X		OP50			20	32		heat_stress				0	1		0	-0.002986
																						Earendil	20210719_AHS1_WT	Earendil_b::0	col9910X::OP50::20::heat_stress	b::0	0	b	5.21562	1.13594	2.0125	1.98438	col9910X		OP50			20	32		heat_stress				0	1		0	0.017847
																						Earendil	20210719_AHS1_WT	Earendil_b::0	col9910X::OP50::20::heat_stress	b::0	0	b	5.21562	1.13594	2.0125	1.98438	col9910X		OP50			20	32		heat_stress				0	1		0	-0.002986
																						Earendil	20210719_AHS1_WT	Earendil_b::0	col9910X::OP50::20::heat_stress	b::0	0	b	5.21562	1.13594	2.0125	1.98438	col9910X		OP50			20	32		heat_stress				0	1		0	0.226181
																						Earendil	20210719_AHS1_WT	Earendil_b::0	col9910X::OP50::20::heat_stress	b::0	0	b	5.21562	1.13594	2.0125	1.98438	col9910X		OP50			20	32		heat_stress				0	1	Extra worm from multiple-worm disambiguation	0	1.05951
																						Earendil	20210719_AHS1_WT	Earendil_b::0	col9910X::OP50::20::heat_stress	b::0	0	b	5.21562	1.13594	2.0125	1.98438	col9910X		OP50			20	32		heat_stress				0	1		0	-0.002986
																						Earendil	20210719_AHS1_WT	Earendil_b::0	col9910X::OP50::20::heat_stress	b::0	0	b	5.21562	1.13594	2.0125	1.98438	col9910X		OP50			20	32		heat_stress				0	1		0	0.517847
																						Earendil	20210719_AHS1_WT	Earendil_b::0	col9910X::OP50::20::heat_stress	b::0	0	b	5.21562	1.13594	2.0125	1.98438	col9910X		OP50			20	32		heat_stress				0	1		0	0.017847
																						Earendil	20210719_AHS1_WT	Earendil_b::0	col9910X::OP50::20::heat_stress	b::0	0	b	5.21562	1.13594	2.0125	1.98438	col9910X		OP50			20	32		heat_stress				0	0		0	0.351181
																						Earendil	20210719_AHS1_WT	Earendil_b::0	col9910X::OP50::20::heat_stress	b::0	0	b	5.21562	1.13594	2.0125	1.98438	col9910X		OP50			20	32		heat_stress				0	0		0	0.267847
																						Earendil	20210719_AHS1_WT	Earendil_b::0	col9910X::OP50::20::heat_stress	b::0	0	b	5.21562	1.13594	2.0125	1.98438	col9910X		OP50			20	32		heat_stress				0	0		0	0.184514
																						Earendil	20210719_AHS1_WT	Earendil_b::0	col9910X::OP50::20::heat_stress	b::0	0	b	5.21562	1.13594	2.0125	1.98438	col9910X		OP50			20	32		heat_stress				0	1		0	0.017847
																						Earendil	20210719_AHS1_WT	Earendil_a::0	WT::OP50::20::heat_stress	a::0	0	a	3.17344	1.11094	1.98438	1.98438	WT		OP50			20	32		heat_stress				0	1		0	-0.002986
																						Earendil	20210719_AHS1_WT	Earendil_a::0	WT::OP50::20::heat_stress	a::0	0	a	3.17344	1.11094	1.98438	1.98438	WT		OP50			20	32		heat_stress				0	1		0	0.038681
																						Earendil	20210719_AHS1_WT	Earendil_a::0	WT::OP50::20::heat_stress	a::0	0	a	3.17344	1.11094	1.98438	1.98438	WT		OP50			20	32		heat_stress				0	1		0	-0.023819
																						Earendil	20210719_AHS1_WT	Earendil_a::0	WT::OP50::20::heat_stress	a::0	0	a	3.17344	1.11094	1.98438	1.98438	WT		OP50			20	32		heat_stress				0	1		0	-0.023819
																						Earendil	20210719_AHS1_WT	Earendil_a::0	WT::OP50::20::heat_stress	a::0	0	a	3.17344	1.11094	1.98438	1.98438	WT		OP50			20	32		heat_stress				0	1		0	-0.002986
																						Earendil	20210719_AHS1_WT	Earendil_a::0	WT::OP50::20::heat_stress	a::0	0	a	3.17344	1.11094	1.98438	1.98438	WT		OP50			20	32		heat_stress				0	1		0	0.622014
																						Earendil	20210719_AHS1_WT	Earendil_a::0	WT::OP50::20::heat_stress	a::0	0	a	3.17344	1.11094	1.98438	1.98438	WT		OP50			20	32		heat_stress				0	0		0	-0.002986
																						Earendil	20210719_AHS1_WT	Earendil_a::0	WT::OP50::20::heat_stress	a::0	0	a	3.17344	1.11094	1.98438	1.98438	WT		OP50			20	32		heat_stress				0	1		0	-0.023819
																						Earendil	20210719_AHS1_WT	Earendil_a::0	WT::OP50::20::heat_stress	a::0	0	a	3.17344	1.11094	1.98438	1.98438	WT		OP50			20	32		heat_stress				0	1		0	-0.023819
																						Earendil	20210719_AHS1_WT	Earendil_a::0	WT::OP50::20::heat_stress	a::0	0	a	3.17344	1.11094	1.98438	1.98438	WT		OP50			20	32		heat_stress				0	1		0	-0.023819
																						Earendil	20210719_AHS1_WT	Earendil_a::0	WT::OP50::20::heat_stress	a::0	0	a	3.17344	1.11094	1.98438	1.98438	WT		OP50			20	32		heat_stress				0	1		0	-0.002986
																						Earendil	20210719_AHS1_WT	Earendil_a::0	WT::OP50::20::heat_stress	a::0	0	a	3.17344	1.11094	1.98438	1.98438	WT		OP50			20	32		heat_stress				0	1		0	0.455347
																						Earendil	20210719_AHS1_WT	Earendil_a::0	WT::OP50::20::heat_stress	a::0	0	a	3.17344	1.11094	1.98438	1.98438	WT		OP50			20	32		heat_stress				0	1		0	0.038681
																						Earendil	20210719_AHS1_WT	Earendil_a::0	WT::OP50::20::heat_stress	a::0	0	a	3.17344	1.11094	1.98438	1.98438	WT		OP50			20	32		heat_stress				0	1		0	1.99701
																						Earendil	20210719_AHS1_WT	Earendil_a::0	WT::OP50::20::heat_stress	a::0	0	a	3.17344	1.11094	1.98438	1.98438	WT		OP50			20	32		heat_stress				0	1		0	-0.023819
																						Earendil	20210719_AHS1_WT	Earendil_a::0	WT::OP50::20::heat_stress	a::0	0	a	3.17344	1.11094	1.98438	1.98438	WT		OP50			20	32		heat_stress				0	1		0	0.580347
																						Earendil	20210719_AHS1_WT	Earendil_a::0	WT::OP50::20::heat_stress	a::0	0	a	3.17344	1.11094	1.98438	1.98438	WT		OP50			20	32		heat_stress				0	1		0	0.622014
																						Earendil	20210719_AHS1_WT	Earendil_a::0	WT::OP50::20::heat_stress	a::0	0	a	3.17344	1.11094	1.98438	1.98438	WT		OP50			20	32		heat_stress				0	1		0	0.080347
																						Earendil	20210719_AHS1_WT	Earendil_a::0	WT::OP50::20::heat_stress	a::0	0	a	3.17344	1.11094	1.98438	1.98438	WT		OP50			20	32		heat_stress				0	1		0	0.872014
																						Earendil	20210719_AHS1_WT	Earendil_a::0	WT::OP50::20::heat_stress	a::0	0	a	3.17344	1.11094	1.98438	1.98438	WT		OP50			20	32		heat_stress				0	1		0	-0.002986
																						Earendil	20210719_AHS1_WT	Earendil_a::0	WT::OP50::20::heat_stress	a::0	0	a	3.17344	1.11094	1.98438	1.98438	WT		OP50			20	32		heat_stress				0	1		0	-0.023819
																						Earendil	20210719_AHS1_WT	Earendil_a::0	WT::OP50::20::heat_stress	a::0	0	a	3.17344	1.11094	1.98438	1.98438	WT		OP50			20	32		heat_stress				0	1		0	0.038681
																						Earendil	20210719_AHS1_WT	Earendil_a::0	WT::OP50::20::heat_stress	a::0	0	a	3.17344	1.11094	1.98438	1.98438	WT		OP50			20	32		heat_stress				0	1	Extra worm from multiple-worm disambiguation	0	1.12201
																						Earendil	20210719_AHS1_WT	Earendil_a::0	WT::OP50::20::heat_stress	a::0	0	a	3.17344	1.11094	1.98438	1.98438	WT		OP50			20	32		heat_stress				0	1		0	0.788681
																						Earendil	20210719_AHS1_WT	Earendil_a::0	WT::OP50::20::heat_stress	a::0	0	a	3.17344	1.11094	1.98438	1.98438	WT		OP50			20	32		heat_stress				0	1		0	-0.023819
																						Earendil	20210719_AHS1_WT	Earendil_a::0	WT::OP50::20::heat_stress	a::0	0	a	3.17344	1.11094	1.98438	1.98438	WT		OP50			20	32		heat_stress				0	1		0	0.372014
																						Earendil	20210719_AHS1_WT	Earendil_a::0	WT::OP50::20::heat_stress	a::0	0	a	3.17344	1.11094	1.98438	1.98438	WT		OP50			20	32		heat_stress				0	1		0	-0.023819
																						Earendil	20210719_AHS1_WT	Earendil_a::0	WT::OP50::20::heat_stress	a::0	0	a	3.17344	1.11094	1.98438	1.98438	WT		OP50			20	32		heat_stress				0	1		0	1.91368
																						Earendil	20210719_AHS1_WT	Earendil_a::0	WT::OP50::20::heat_stress	a::0	0	a	3.17344	1.11094	1.98438	1.98438	WT		OP50			20	32		heat_stress				0	1		0	0.122014
																						Earendil	20210719_AHS1_WT	Earendil_a::0	WT::OP50::20::heat_stress	a::0	0	a	3.17344	1.11094	1.98438	1.98438	WT		OP50			20	32		heat_stress				0	1		0	-0.023819
																						Earendil	20210719_AHS1_WT	Earendil_a::0	WT::OP50::20::heat_stress	a::0	0	a	3.17344	1.11094	1.98438	1.98438	WT		OP50			20	32		heat_stress				0	0		0	0.747014
																						Earendil	20210719_AHS1_WT	Earendil_a::0	WT::OP50::20::heat_stress	a::0	0	a	3.17344	1.11094	1.98438	1.98438	WT		OP50			20	32		heat_stress				0	1		0	-0.023819
																						Earendil	20210719_AHS1_WT	Earendil_a::0	WT::OP50::20::heat_stress	a::0	0	a	3.17344	1.11094	1.98438	1.98438	WT		OP50			20	32		heat_stress				0	1		0	-0.002986
																						Earendil	20210719_AHS1_WT	Earendil_a::0	WT::OP50::20::heat_stress	a::0	0	a	3.17344	1.11094	1.98438	1.98438	WT		OP50			20	32		heat_stress				0	1		0	-0.023819
																						Earendil	20210719_AHS1_WT	Earendil_a::0	WT::OP50::20::heat_stress	a::0	0	a	3.17344	1.11094	1.98438	1.98438	WT		OP50			20	32		heat_stress				0	1		0	-0.023819
																						Earendil	20210719_AHS1_WT	Earendil_a::0	WT::OP50::20::heat_stress	a::0	0	a	3.17344	1.11094	1.98438	1.98438	WT		OP50			20	32		heat_stress				0	1		0	-0.002986
																						Earendil	20210719_AHS1_WT	Earendil_a::0	WT::OP50::20::heat_stress	a::0	0	a	3.17344	1.11094	1.98438	1.98438	WT		OP50			20	32		heat_stress				0	1		0	-0.002986
																						Earendil	20210719_AHS1_WT	Earendil_a::0	WT::OP50::20::heat_stress	a::0	0	a	3.17344	1.11094	1.98438	1.98438	WT		OP50			20	32		heat_stress				0	1		0	0.205347
																						Earendil	20210719_AHS1_WT	Earendil_a::0	WT::OP50::20::heat_stress	a::0	0	a	3.17344	1.11094	1.98438	1.98438	WT		OP50			20	32		heat_stress				0	1		0	0.038681
																						Earendil	20210719_AHS1_WT	Earendil_a::0	WT::OP50::20::heat_stress	a::0	0	a	3.17344	1.11094	1.98438	1.98438	WT		OP50			20	32		heat_stress				0	1		0	0.038681
																						Earendil	20210719_AHS1_WT	Earendil_a::0	WT::OP50::20::heat_stress	a::0	0	a	3.17344	1.11094	1.98438	1.98438	WT		OP50			20	32		heat_stress				0	1		0	1.70535
																						Earendil	20210719_AHS1_WT	Earendil_a::0	WT::OP50::20::heat_stress	a::0	0	a	3.17344	1.11094	1.98438	1.98438	WT		OP50			20	32		heat_stress				0	1		0	0.705347
																						Earendil	20210719_AHS1_WT	Earendil_a::0	WT::OP50::20::heat_stress	a::0	0	a	3.17344	1.11094	1.98438	1.98438	WT		OP50			20	32		heat_stress				0	1		0	0.330347
																						Earendil	20210719_AHS1_WT	Earendil_a::0	WT::OP50::20::heat_stress	a::0	0	a	3.17344	1.11094	1.98438	1.98438	WT		OP50			20	32		heat_stress				0	1		0	-0.023819
																						Earendil	20210719_AHS1_WT	Earendil_a::0	WT::OP50::20::heat_stress	a::0	0	a	3.17344	1.11094	1.98438	1.98438	WT		OP50			20	32		heat_stress				0	1		0	-0.023819
																						Earendil	20210719_AHS1_WT	Earendil_a::0	WT::OP50::20::heat_stress	a::0	0	a	3.17344	1.11094	1.98438	1.98438	WT		OP50			20	32		heat_stress				0	1		0	-0.023819
																						Earendil	20210719_AHS1_WT	Earendil_a::0	WT::OP50::20::heat_stress	a::0	0	a	3.17344	1.11094	1.98438	1.98438	WT		OP50			20	32		heat_stress				0	1		0	0.455347
																						Earendil	20210719_AHS1_WT	Earendil_a::0	WT::OP50::20::heat_stress	a::0	0	a	3.17344	1.11094	1.98438	1.98438	WT		OP50			20	32		heat_stress				0	1		0	0.038681
																						Earendil	20210719_AHS1_WT	Earendil_a::0	WT::OP50::20::heat_stress	a::0	0	a	3.17344	1.11094	1.98438	1.98438	WT		OP50			20	32		heat_stress				0	1		0	0.038681
																						Earendil	20210719_AHS1_WT	Earendil_a::0	WT::OP50::20::heat_stress	a::0	0	a	3.17344	1.11094	1.98438	1.98438	WT		OP50			20	32		heat_stress				0	1		0	0.497014
																						Earendil	20210719_AHS1_WT	Earendil_a::0	WT::OP50::20::heat_stress	a::0	0	a	3.17344	1.11094	1.98438	1.98438	WT		OP50			20	32		heat_stress				0	1		0	-0.023819
																						Earendil	20210719_AHS1_WT	Earendil_a::0	WT::OP50::20::heat_stress	a::0	0	a	3.17344	1.11094	1.98438	1.98438	WT		OP50			20	32		heat_stress				0	1		0	-0.002986
																						Earendil	20210719_AHS1_WT	Earendil_a::0	WT::OP50::20::heat_stress	a::0	0	a	3.17344	1.11094	1.98438	1.98438	WT		OP50			20	32		heat_stress				0	0		0	0.038681
																						Earendil	20210719_AHS1_WT	Earendil_a::0	WT::OP50::20::heat_stress	a::0	0	a	3.17344	1.11094	1.98438	1.98438	WT		OP50			20	32		heat_stress				0	0		0	0.580347
																						Earendil	20210719_AHS1_WT	Earendil_a::0	WT::OP50::20::heat_stress	a::0	0	a	3.17344	1.11094	1.98438	1.98438	WT		OP50			20	32		heat_stress				0	1		0	-0.002986
																						Earendil	20210719_AHS1_WT	Earendil_a::0	WT::OP50::20::heat_stress	a::0	0	a	3.17344	1.11094	1.98438	1.98438	WT		OP50			20	32		heat_stress				0	1		0	0.038681
																						Earendil	20210719_AHS1_WT	Earendil_a::0	WT::OP50::20::heat_stress	a::0	0	a	3.17344	1.11094	1.98438	1.98438	WT		OP50			20	32		heat_stress				0	1		0	0.997014
																						Earendil	20210719_AHS1_WT	Earendil_a::0	WT::OP50::20::heat_stress	a::0	0	a	3.17344	1.11094	1.98438	1.98438	WT		OP50			20	32		heat_stress				0	0		0	0.538681
																						Earendil	20210719_AHS1_WT	Earendil_a::0	WT::OP50::20::heat_stress	a::0	0	a	3.17344	1.11094	1.98438	1.98438	WT		OP50			20	32		heat_stress				0	1		0	0.080347
																						Earendil	20210719_AHS1_WT	Earendil_a::0	WT::OP50::20::heat_stress	a::0	0	a	3.17344	1.11094	1.98438	1.98438	WT		OP50			20	32		heat_stress				0	1		0	0.913681
																						Earendil	20210719_AHS1_WT	Earendil_a::0	WT::OP50::20::heat_stress	a::0	0	a	3.17344	1.11094	1.98438	1.98438	WT		OP50			20	32		heat_stress				0	1		0	0.080347
																						Earendil	20210719_AHS1_WT	Earendil_a::0	WT::OP50::20::heat_stress	a::0	0	a	3.17344	1.11094	1.98438	1.98438	WT		OP50			20	32		heat_stress				0	1		0	0.038681
																						Earendil	20210719_AHS1_WT	Earendil_a::0	WT::OP50::20::heat_stress	a::0	0	a	3.17344	1.11094	1.98438	1.98438	WT		OP50			20	32		heat_stress				0	0		0	0.955347
																						Earendil	20210719_AHS1_WT	Earendil_a::0	WT::OP50::20::heat_stress	a::0	0	a	3.17344	1.11094	1.98438	1.98438	WT		OP50			20	32		heat_stress				0	0		0	-0.023819
																						Earendil	20210719_AHS1_WT	Earendil_a::0	WT::OP50::20::heat_stress	a::0	0	a	3.17344	1.11094	1.98438	1.98438	WT		OP50			20	32		heat_stress				0	1		0	-0.002986
																						Earendil	20210719_AHS1_WT	Earendil_a::0	WT::OP50::20::heat_stress	a::0	0	a	3.17344	1.11094	1.98438	1.98438	WT		OP50			20	32		heat_stress				0	1		0	-0.023819
																						Earendil	20210719_AHS1_WT	Earendil_a::0	WT::OP50::20::heat_stress	a::0	0	a	3.17344	1.11094	1.98438	1.98438	WT		OP50			20	32		heat_stress				0	1		0	-0.002986
																						Earendil	20210719_AHS1_WT	Earendil_a::0	WT::OP50::20::heat_stress	a::0	0	a	3.17344	1.11094	1.98438	1.98438	WT		OP50			20	32		heat_stress				0	1		0	0.913681
																						Earendil	20210719_AHS1_WT	Earendil_a::0	WT::OP50::20::heat_stress	a::0	0	a	3.17344	1.11094	1.98438	1.98438	WT		OP50			20	32		heat_stress				0	1		0	0.747014
																						Earendil	20210719_AHS1_WT	Earendil_a::0	WT::OP50::20::heat_stress	a::0	0	a	3.17344	1.11094	1.98438	1.98438	WT		OP50			20	32		heat_stress				0	0		0	0.913681
																						Earendil	20210719_AHS1_WT	Earendil_a::0	WT::OP50::20::heat_stress	a::0	0	a	3.17344	1.11094	1.98438	1.98438	WT		OP50			20	32		heat_stress				0	1		0	-0.023819
																						Earendil	20210719_AHS1_WT	Earendil_a::0	WT::OP50::20::heat_stress	a::0	0	a	3.17344	1.11094	1.98438	1.98438	WT		OP50			20	32		heat_stress				0	1		0	0.038681
																						Earendil	20210719_AHS1_WT	Earendil_a::0	WT::OP50::20::heat_stress	a::0	0	a	3.17344	1.11094	1.98438	1.98438	WT		OP50			20	32		heat_stress				0	0		0	0.830347
																						Earendil	20210719_AHS1_WT	Earendil_a::0	WT::OP50::20::heat_stress	a::0	0	a	3.17344	1.11094	1.98438	1.98438	WT		OP50			20	32		heat_stress				0	1		0	-0.023819
																						Earendil	20210719_AHS1_WT	Earendil_a::0	WT::OP50::20::heat_stress	a::0	0	a	3.17344	1.11094	1.98438	1.98438	WT		OP50			20	32		heat_stress				0	1		0	0.872014
																						Earendil	20210719_AHS1_WT	Earendil_a::0	WT::OP50::20::heat_stress	a::0	0	a	3.17344	1.11094	1.98438	1.98438	WT		OP50			20	32		heat_stress				0	1		0	0.747014
																						Earendil	20210719_AHS1_WT	Earendil_a::0	WT::OP50::20::heat_stress	a::0	0	a	3.17344	1.11094	1.98438	1.98438	WT		OP50			20	32		heat_stress				0	1		0	-0.002986
																						Earendil	20210719_AHS1_WT	Earendil_a::0	WT::OP50::20::heat_stress	a::0	0	a	3.17344	1.11094	1.98438	1.98438	WT		OP50			20	32		heat_stress				0	0		0	0.622014
																						Earendil	20210719_AHS1_WT	Earendil_a::0	WT::OP50::20::heat_stress	a::0	0	a	3.17344	1.11094	1.98438	1.98438	WT		OP50			20	32		heat_stress				0	1		0	-0.023819
																						Earendil	20210719_AHS1_WT	Earendil_a::0	WT::OP50::20::heat_stress	a::0	0	a	3.17344	1.11094	1.98438	1.98438	WT		OP50			20	32		heat_stress				0	0		0	0.830347
																						Earendil	20210719_AHS1_WT	Earendil_a::0	WT::OP50::20::heat_stress	a::0	0	a	3.17344	1.11094	1.98438	1.98438	WT		OP50			20	32		heat_stress				0	0		0	0.747014
																						Earendil	20210719_AHS1_WT	Earendil_a::0	WT::OP50::20::heat_stress	a::0	0	a	3.17344	1.11094	1.98438	1.98438	WT		OP50			20	32		heat_stress				0	0		0	0.622014
																						Earendil	20210719_AHS1_WT	Earendil_a::0	WT::OP50::20::heat_stress	a::0	0	a	3.17344	1.11094	1.98438	1.98438	WT		OP50			20	32		heat_stress				0	1		0	0.830347
																						Earendil	20210719_AHS1_WT	Earendil_a::0	WT::OP50::20::heat_stress	a::0	0	a	3.17344	1.11094	1.98438	1.98438	WT		OP50			20	32		heat_stress				0	1		0	0.247014
																						Earendil	20210719_AHS1_WT	Earendil_a::0	WT::OP50::20::heat_stress	a::0	0	a	3.17344	1.11094	1.98438	1.98438	WT		OP50			20	32		heat_stress				0	0		0	0.747014
																						Earendil	20210719_AHS1_WT	Earendil_a::0	WT::OP50::20::heat_stress	a::0	0	a	3.17344	1.11094	1.98438	1.98438	WT		OP50			20	32		heat_stress				0	0		0	0.705347
																						Earendil	20210719_AHS1_WT	Earendil_a::0	WT::OP50::20::heat_stress	a::0	0	a	3.17344	1.11094	1.98438	1.98438	WT		OP50			20	32		heat_stress				0	0		0	0.747014
																						Earendil	20210719_AHS1_WT	Earendil_a::0	WT::OP50::20::heat_stress	a::0	0	a	3.17344	1.11094	1.98438	1.98438	WT		OP50			20	32		heat_stress				0	0		0	0.788681
																						Earendil	20210719_AHS1_WT	Earendil_a::0	WT::OP50::20::heat_stress	a::0	0	a	3.17344	1.11094	1.98438	1.98438	WT		OP50			20	32		heat_stress				0	0		0	0.038681
																						Earendil	20210719_AHS1_WT	Earendil_a::0	WT::OP50::20::heat_stress	a::0	0	a	3.17344	1.11094	1.98438	1.98438	WT		OP50			20	32		heat_stress				0	0		0	0.788681
																						Earendil	20210719_AHS1_WT	Earendil_a::0	WT::OP50::20::heat_stress	a::0	0	a	3.17344	1.11094	1.98438	1.98438	WT		OP50			20	32		heat_stress				0	0		0	0.580347
																						Earendil	20210719_AHS1_WT	Earendil_a::0	WT::OP50::20::heat_stress	a::0	0	a	3.17344	1.11094	1.98438	1.98438	WT		OP50			20	32		heat_stress				0	0		0	0.705347
																						Earendil	20210719_AHS1_WT	Earendil_a::0	WT::OP50::20::heat_stress	a::0	0	a	3.17344	1.11094	1.98438	1.98438	WT		OP50			20	32		heat_stress				0	0		0	0.580347
																						Earendil	20210719_AHS1_WT	Earendil_a::0	WT::OP50::20::heat_stress	a::0	0	a	3.17344	1.11094	1.98438	1.98438	WT		OP50			20	32		heat_stress				0	1		0	0.747014
																						Earendil	20210719_AHS1_WT	Earendil_a::0	WT::OP50::20::heat_stress	a::0	0	a	3.17344	1.11094	1.98438	1.98438	WT		OP50			20	32		heat_stress				0	0		0	0.747014
																						Earendil	20210719_AHS1_WT	Earendil_a::0	WT::OP50::20::heat_stress	a::0	0	a	3.17344	1.11094	1.98438	1.98438	WT		OP50			20	32		heat_stress				0	1		0	0.747014
																						Earendil	20210719_AHS1_WT	Earendil_a::0	WT::OP50::20::heat_stress	a::0	0	a	3.17344	1.11094	1.98438	1.98438	WT		OP50			20	32		heat_stress				0	0		0	0.663681
																						Earendil	20210719_AHS1_WT	Earendil_a::0	WT::OP50::20::heat_stress	a::0	0	a	3.17344	1.11094	1.98438	1.98438	WT		OP50			20	32		heat_stress				0	1		0	0.663681
																						Earendil	20210719_AHS1_WT	Earendil_a::0	WT::OP50::20::heat_stress	a::0	0	a	3.17344	1.11094	1.98438	1.98438	WT		OP50			20	32		heat_stress				0	0		0	0.663681
																						Earendil	20210719_AHS1_WT	Earendil_a::0	WT::OP50::20::heat_stress	a::0	0	a	3.17344	1.11094	1.98438	1.98438	WT		OP50			20	32		heat_stress				0	1		0	0.580347
																						Earendil	20210719_AHS1_WT	Earendil_a::0	WT::OP50::20::heat_stress	a::0	0	a	3.17344	1.11094	1.98438	1.98438	WT		OP50			20	32		heat_stress				0	0		0	0.663681
																						Earendil	20210719_AHS1_WT	Earendil_a::0	WT::OP50::20::heat_stress	a::0	0	a	3.17344	1.11094	1.98438	1.98438	WT		OP50			20	32		heat_stress				0	1		0	-0.002986
																						Earendil	20210719_AHS1_WT	Earendil_a::0	WT::OP50::20::heat_stress	a::0	0	a	3.17344	1.11094	1.98438	1.98438	WT		OP50			20	32		heat_stress				0	1		0	0.622014
																						Earendil	20210719_AHS1_WT	Earendil_a::0	WT::OP50::20::heat_stress	a::0	0	a	3.17344	1.11094	1.98438	1.98438	WT		OP50			20	32		heat_stress				0	0		0	0.622014
																						Earendil	20210719_AHS1_WT	Earendil_a::0	WT::OP50::20::heat_stress	a::0	0	a	3.17344	1.11094	1.98438	1.98438	WT		OP50			20	32		heat_stress				0	1		0	0.080347
																						Earendil	20210719_AHS1_WT	Earendil_a::0	WT::OP50::20::heat_stress	a::0	0	a	3.17344	1.11094	1.98438	1.98438	WT		OP50			20	32		heat_stress				0	0		0	0.038681
																						Earendil	20210719_AHS1_WT	Earendil_a::0	WT::OP50::20::heat_stress	a::0	0	a	3.17344	1.11094	1.98438	1.98438	WT		OP50			20	32		heat_stress				0	1		0	0.205347
																						Earendil	20210719_AHS1_WT	Earendil_a::0	WT::OP50::20::heat_stress	a::0	0	a	3.17344	1.11094	1.98438	1.98438	WT		OP50			20	32		heat_stress				0	1		0	-0.002986
																						Earendil	20210719_AHS1_WT	Earendil_a::0	WT::OP50::20::heat_stress	a::0	0	a	3.17344	1.11094	1.98438	1.98438	WT		OP50			20	32		heat_stress				0	0		0	0.247014
																						Earendil	20210719_AHS1_WT	Earendil_a::0	WT::OP50::20::heat_stress	a::0	0	a	3.17344	1.11094	1.98438	1.98438	WT		OP50			20	32		heat_stress				0	0		0	0.288681
																						Earendil	20210719_AHS1_WT	Earendil_a::0	WT::OP50::20::heat_stress	a::0	0	a	3.17344	1.11094	1.98438	1.98438	WT		OP50			20	32		heat_stress				0	0		0	-0.002986
																						Earendil	20210719_AHS1_WT	Earendil_a::0	WT::OP50::20::heat_stress	a::0	0	a	3.17344	1.11094	1.98438	1.98438	WT		OP50			20	32		heat_stress				0	1		0	-0.023819
																						Earendil	20210719_AHS1_WT	Earendil_a::0	WT::OP50::20::heat_stress	a::0	0	a	3.17344	1.11094	1.98438	1.98438	WT		OP50			20	32		heat_stress				0	0		0	-0.002986
																						Earendil	20210719_AHS1_WT	Earendil_a::0	WT::OP50::20::heat_stress	a::0	0	a	3.17344	1.11094	1.98438	1.98438	WT		OP50			20	32		heat_stress				0	1		0	-0.023819
																						Earendil	20210719_AHS1_WT	Earendil_a::0	WT::OP50::20::heat_stress	a::0	0	a	3.17344	1.11094	1.98438	1.98438	WT		OP50			20	32		heat_stress				0	1		0	-0.023819
																						Earendil	20210719_AHS1_WT	Earendil_a::0	WT::OP50::20::heat_stress	a::0	0	a	3.17344	1.11094	1.98438	1.98438	WT		OP50			20	32		heat_stress				0	1		0	0.038681
																						Earendil	20210719_AHS1_WT	Earendil_a::0	WT::OP50::20::heat_stress	a::0	0	a	3.17344	1.11094	1.98438	1.98438	WT		OP50			20	32		heat_stress				0	1		0	-0.002986
																						Earendil	20210719_AHS1_WT	Earendil_a::0	WT::OP50::20::heat_stress	a::0	0	a	3.17344	1.11094	1.98438	1.98438	WT		OP50			20	32		heat_stress				0	0		0	0.413681
																						Earendil	20210719_AHS1_WT	Earendil_a::0	WT::OP50::20::heat_stress	a::0	0	a	3.17344	1.11094	1.98438	1.98438	WT		OP50			20	32		heat_stress				0	1		0	0.455347
																						Earendil	20210719_AHS1_WT	Earendil_a::0	WT::OP50::20::heat_stress	a::0	0	a	3.17344	1.11094	1.98438	1.98438	WT		OP50			20	32		heat_stress				0	0		0	0.413681
																						Earendil	20210719_AHS1_WT	Earendil_a::0	WT::OP50::20::heat_stress	a::0	0	a	3.17344	1.11094	1.98438	1.98438	WT		OP50			20	32		heat_stress				0	1		0	0.413681
																						Earendil	20210719_AHS1_WT	Earendil_a::0	WT::OP50::20::heat_stress	a::0	0	a	3.17344	1.11094	1.98438	1.98438	WT		OP50			20	32		heat_stress				0	1		0	-0.002986
																						Earendil	20210719_AHS1_WT	Earendil_a::0	WT::OP50::20::heat_stress	a::0	0	a	3.17344	1.11094	1.98438	1.98438	WT		OP50			20	32		heat_stress				0	1		0	0.413681
																						Earendil	20210719_AHS1_WT	Earendil_a::0	WT::OP50::20::heat_stress	a::0	0	a	3.17344	1.11094	1.98438	1.98438	WT		OP50			20	32		heat_stress				0	1		0	-0.023819
																						Earendil	20210719_AHS1_WT	Earendil_a::0	WT::OP50::20::heat_stress	a::0	0	a	3.17344	1.11094	1.98438	1.98438	WT		OP50			20	32		heat_stress				0	0		0	0.288681
																						Earendil	20210719_AHS1_WT	Earendil_a::0	WT::OP50::20::heat_stress	a::0	0	a	3.17344	1.11094	1.98438	1.98438	WT		OP50			20	32		heat_stress				0	0		0	0.080347
																						Earendil	20210719_AHS1_WT	Earendil_a::0	WT::OP50::20::heat_stress	a::0	0	a	3.17344	1.11094	1.98438	1.98438	WT		OP50			20	32		heat_stress				0	0		0	0.122014
																						Earendil	20210719_AHS1_WT	Earendil_a::0	WT::OP50::20::heat_stress	a::0	0	a	3.17344	1.11094	1.98438	1.98438	WT		OP50			20	32		heat_stress				0	1		0	0.038681
																						Earendil	20210719_AHS1_WT	Earendil_a::0	WT::OP50::20::heat_stress	a::0	0	a	3.17344	1.11094	1.98438	1.98438	WT		OP50			20	32		heat_stress				0	0		0	-0.002986
																						Earendil	20210719_AHS1_WT	Earendil_a::0	WT::OP50::20::heat_stress	a::0	0	a	3.17344	1.11094	1.98438	1.98438	WT		OP50			20	32		heat_stress				0	1		0	0.247014
																						Earendil	20210719_AHS1_WT	Earendil_a::0	WT::OP50::20::heat_stress	a::0	0	a	3.17344	1.11094	1.98438	1.98438	WT		OP50			20	32		heat_stress				0	0		0	-0.002986
																						Earendil	20210719_AHS1_WT	Earendil_a::0	WT::OP50::20::heat_stress	a::0	0	a	3.17344	1.11094	1.98438	1.98438	WT		OP50			20	32		heat_stress				0	0		0	0.205347
																						Earendil	20210719_AHS1_WT	Earendil_a::0	WT::OP50::20::heat_stress	a::0	0	a	3.17344	1.11094	1.98438	1.98438	WT		OP50			20	32		heat_stress				0	0		0	0.163681
																						Earendil	20210719_AHS1_WT	Earendil_a::0	WT::OP50::20::heat_stress	a::0	0	a	3.17344	1.11094	1.98438	1.98438	WT		OP50			20	32		heat_stress				0	1		0	-0.002986
																						Earendil	20210719_AHS1_WT	Earendil_a::0	WT::OP50::20::heat_stress	a::0	0	a	3.17344	1.11094	1.98438	1.98438	WT		OP50			20	32		heat_stress				0	0		0	0.122014
																						Earendil	20210719_AHS1_WT	Earendil_a::0	WT::OP50::20::heat_stress	a::0	0	a	3.17344	1.11094	1.98438	1.98438	WT		OP50			20	32		heat_stress				0	1		0	0.163681
																						Earendil	20210719_AHS1_WT	Earendil_a::0	WT::OP50::20::heat_stress	a::0	0	a	3.17344	1.11094	1.98438	1.98438	WT		OP50			20	32		heat_stress				0	1		0	0.080347
																						Earendil	20210719_AHS1_WT	Earendil_a::0	WT::OP50::20::heat_stress	a::0	0	a	3.17344	1.11094	1.98438	1.98438	WT		OP50			20	32		heat_stress				0	1		0	0.038681
																						Earendil	20210719_AHS1_WT	Earendil_a::0	WT::OP50::20::heat_stress	a::0	0	a	3.17344	1.11094	1.98438	1.98438	WT		OP50			20	32		heat_stress				0	1		0	0.038681
																						Earendil	20210719_AHS1_WT	Earendil_a::0	WT::OP50::20::heat_stress	a::0	0	a	3.17344	1.11094	1.98438	1.98438	WT		OP50			20	32		heat_stress				0	1		0	0.122014
																						Earendil	20210719_AHS1_WT	Earendil_a::0	WT::OP50::20::heat_stress	a::0	0	a	3.17344	1.11094	1.98438	1.98438	WT		OP50			20	32		heat_stress				0	1		0	0.122014
																						Earendil	20210719_AHS1_WT	Earendil_a::0	WT::OP50::20::heat_stress	a::0	0	a	3.17344	1.11094	1.98438	1.98438	WT		OP50			20	32		heat_stress				0	1		0	-0.023819
																						Earendil	20210719_AHS1_WT	Earendil_a::0	WT::OP50::20::heat_stress	a::0	0	a	3.17344	1.11094	1.98438	1.98438	WT		OP50			20	32		heat_stress				0	1		0	-0.023819
																						Earendil	20210719_AHS1_WT	Earendil_a::0	WT::OP50::20::heat_stress	a::0	0	a	3.17344	1.11094	1.98438	1.98438	WT		OP50			20	32		heat_stress				0	1	Extra worm from multiple-worm disambiguation	0	-0.023819
																						Earendil	20210719_AHS1_WT	Earendil_a::0	WT::OP50::20::heat_stress	a::0	0	a	3.17344	1.11094	1.98438	1.98438	WT		OP50			20	32		heat_stress				0	1		0	-0.023819
																						Earendil	20210719_AHS1_WT	Earendil_a::0	WT::OP50::20::heat_stress	a::0	0	a	3.17344	1.11094	1.98438	1.98438	WT		OP50			20	32		heat_stress				0	1	Extra worm from multiple-worm disambiguation	0	-0.002986
																						Earendil	20210719_AHS1_WT	Earendil_a::0	WT::OP50::20::heat_stress	a::0	0	a	3.17344	1.11094	1.98438	1.98438	WT		OP50			20	32		heat_stress				0	1		0	-0.023819
																						Earendil	20210719_AHS1_WT	Earendil_a::0	WT::OP50::20::heat_stress	a::0	0	a	3.17344	1.11094	1.98438	1.98438	WT		OP50			20	32		heat_stress				0	0		0	0.038681
																						Earendil	20210719_AHS1_WT	Earendil_a::0	WT::OP50::20::heat_stress	a::0	0	a	3.17344	1.11094	1.98438	1.98438	WT		OP50			20	32		heat_stress				0	0		0	-0.023819
																						Earendil	20210719_AHS1_WT	Earendil_a::0	WT::OP50::20::heat_stress	a::0	0	a	3.17344	1.11094	1.98438	1.98438	WT		OP50			20	32		heat_stress				0	1		0	-0.023819
																						Earendil	20210719_AHS1_WT	Earendil_a::0	WT::OP50::20::heat_stress	a::0	0	a	3.17344	1.11094	1.98438	1.98438	WT		OP50			20	32		heat_stress				0	0		0	0.122014
																						Earendil	20210719_AHS1_WT	Earendil_a::0	WT::OP50::20::heat_stress	a::0	0	a	3.17344	1.11094	1.98438	1.98438	WT		OP50			20	32		heat_stress				0	1		0	-0.002986
																						Earendil	20210719_AHS1_WT	Earendil_a::0	WT::OP50::20::heat_stress	a::0	0	a	3.17344	1.11094	1.98438	1.98438	WT		OP50			20	32		heat_stress				0	1		0	-0.023819
																						Earendil	20210719_AHS1_WT	Earendil_a::0	WT::OP50::20::heat_stress	a::0	0	a	3.17344	1.11094	1.98438	1.98438	WT		OP50			20	32		heat_stress				0	1		0	-0.002986
																						Earendil	20210719_AHS1_WT	Earendil_a::0	WT::OP50::20::heat_stress	a::0	0	a	3.17344	1.11094	1.98438	1.98438	WT		OP50			20	32		heat_stress				0	1		0	-0.023819
																						Earendil	20210719_AHS1_WT	Earendil_a::0	WT::OP50::20::heat_stress	a::0	0	a	3.17344	1.11094	1.98438	1.98438	WT		OP50			20	32		heat_stress				0	1		0	-0.023819
																						Earendil	20210719_AHS1_WT	Earendil_a::0	WT::OP50::20::heat_stress	a::0	0	a	3.17344	1.11094	1.98438	1.98438	WT		OP50			20	32		heat_stress				0	1		0	-0.023819
																						Earendil	20210719_AHS1_WT	Earendil_a::0	WT::OP50::20::heat_stress	a::0	0	a	3.17344	1.11094	1.98438	1.98438	WT		OP50			20	32		heat_stress				0	1		0	-0.023819
																						Earendil	20210719_AHS1_WT	Earendil_a::0	WT::OP50::20::heat_stress	a::0	0	a	3.17344	1.11094	1.98438	1.98438	WT		OP50			20	32		heat_stress				0	1		0	-0.023819
																						Earendil	20210719_AHS1_WT	Earendil_a::0	WT::OP50::20::heat_stress	a::0	0	a	3.17344	1.11094	1.98438	1.98438	WT		OP50			20	32		heat_stress				0	1		0	-0.002986
																						Earendil	20210719_AHS1_WT	Earendil_a::0	WT::OP50::20::heat_stress	a::0	0	a	3.17344	1.11094	1.98438	1.98438	WT		OP50			20	32		heat_stress				0	1		0	-0.023819
																						Earendil	20210719_AHS1_WT	Earendil_a::0	WT::OP50::20::heat_stress	a::0	0	a	3.17344	1.11094	1.98438	1.98438	WT		OP50			20	32		heat_stress				0	1		0	-0.023819
																						Earendil	20210719_AHS1_WT	Earendil_a::0	WT::OP50::20::heat_stress	a::0	0	a	3.17344	1.11094	1.98438	1.98438	WT		OP50			20	32		heat_stress				0	1		0	-0.023819
																						Earendil	20210719_AHS1_WT	Earendil_a::0	WT::OP50::20::heat_stress	a::0	0	a	3.17344	1.11094	1.98438	1.98438	WT		OP50			20	32		heat_stress				0	1		0	-0.023819
																						Earendil	20210719_AHS1_WT	Earendil_a::0	WT::OP50::20::heat_stress	a::0	0	a	3.17344	1.11094	1.98438	1.98438	WT		OP50			20	32		heat_stress				0	0		0	0.080347
																						Earendil	20210719_AHS1_WT	Earendil_a::0	WT::OP50::20::heat_stress	a::0	0	a	3.17344	1.11094	1.98438	1.98438	WT		OP50			20	32		heat_stress				0	1		0	-0.023819
																						Earendil	20210719_AHS1_WT	Earendil_a::0	WT::OP50::20::heat_stress	a::0	0	a	3.17344	1.11094	1.98438	1.98438	WT		OP50			20	32		heat_stress				0	1		0	-0.023819
																						Earendil	20210719_AHS1_WT	Earendil_a::0	WT::OP50::20::heat_stress	a::0	0	a	3.17344	1.11094	1.98438	1.98438	WT		OP50			20	32		heat_stress				0	1		0	-0.023819
																						Earendil	20210719_AHS1_WT	Earendil_a::0	WT::OP50::20::heat_stress	a::0	0	a	3.17344	1.11094	1.98438	1.98438	WT		OP50			20	32		heat_stress				0	1		0	-0.023819
																						Earendil	20210719_AHS1_WT	Earendil_a::0	WT::OP50::20::heat_stress	a::0	0	a	3.17344	1.11094	1.98438	1.98438	WT		OP50			20	32		heat_stress				0	1		0	0.080347
																						Earendil	20210719_AHS1_WT	Earendil_a::0	WT::OP50::20::heat_stress	a::0	0	a	3.17344	1.11094	1.98438	1.98438	WT		OP50			20	32		heat_stress				0	1		0	-0.023819
																						Earendil	20210719_AHS1_WT	Earendil_a::0	WT::OP50::20::heat_stress	a::0	0	a	3.17344	1.11094	1.98438	1.98438	WT		OP50			20	32		heat_stress				0	0		0	-0.023819
																						Earendil	20210719_AHS1_WT	Earendil_a::0	WT::OP50::20::heat_stress	a::0	0	a	3.17344	1.11094	1.98438	1.98438	WT		OP50			20	32		heat_stress				0	1		0	-0.023819
																						Earendil	20210719_AHS1_WT	Earendil_a::0	WT::OP50::20::heat_stress	a::0	0	a	3.17344	1.11094	1.98438	1.98438	WT		OP50			20	32		heat_stress				0	1		0	-0.023819
																						Earendil	20210719_AHS1_WT	Earendil_a::0	WT::OP50::20::heat_stress	a::0	0	a	3.17344	1.11094	1.98438	1.98438	WT		OP50			20	32		heat_stress				0	1		0	-0.023819
																						Earendil	20210719_AHS1_WT	Earendil_a::0	WT::OP50::20::heat_stress	a::0	0	a	3.17344	1.11094	1.98438	1.98438	WT		OP50			20	32		heat_stress				0	1		0	-0.023819
																						Earendil	20210719_AHS1_WT	Earendil_a::0	WT::OP50::20::heat_stress	a::0	0	a	3.17344	1.11094	1.98438	1.98438	WT		OP50			20	32		heat_stress				0	1		0	-0.002986
																						Earendil	20210719_AHS1_WT	Earendil_a::0	WT::OP50::20::heat_stress	a::0	0	a	3.17344	1.11094	1.98438	1.98438	WT		OP50			20	32		heat_stress				0	1		0	-0.023819
																						Earendil	20210719_AHS1_WT	Earendil_a::0	WT::OP50::20::heat_stress	a::0	0	a	3.17344	1.11094	1.98438	1.98438	WT		OP50			20	32		heat_stress				0	1		0	-0.023819
																						Earendil	20210719_AHS1_WT	Earendil_a::0	WT::OP50::20::heat_stress	a::0	0	a	3.17344	1.11094	1.98438	1.98438	WT		OP50			20	32		heat_stress				0	1		0	-0.023819
																						Earendil	20210719_AHS1_WT	Earendil_a::0	WT::OP50::20::heat_stress	a::0	0	a	3.17344	1.11094	1.98438	1.98438	WT		OP50			20	32		heat_stress				0	1		0	-0.023819
																						Earendil	20210719_AHS1_WT	Earendil_a::0	WT::OP50::20::heat_stress	a::0	0	a	3.17344	1.11094	1.98438	1.98438	WT		OP50			20	32		heat_stress				0	1		0	0.038681
																						Earendil	20210719_AHS1_WT	Earendil_a::0	WT::OP50::20::heat_stress	a::0	0	a	3.17344	1.11094	1.98438	1.98438	WT		OP50			20	32		heat_stress				0	1		0	-0.023819
																						Earendil	20210719_AHS1_WT	Earendil_a::0	WT::OP50::20::heat_stress	a::0	0	a	3.17344	1.11094	1.98438	1.98438	WT		OP50			20	32		heat_stress				0	1		0	-0.023819
																						Earendil	20210719_AHS1_WT	Earendil_a::0	WT::OP50::20::heat_stress	a::0	0	a	3.17344	1.11094	1.98438	1.98438	WT		OP50			20	32		heat_stress				0	0		0	-0.002986
																						Earendil	20210719_AHS1_WT	Earendil_a::0	WT::OP50::20::heat_stress	a::0	0	a	3.17344	1.11094	1.98438	1.98438	WT		OP50			20	32		heat_stress				0	1		0	-0.023819
																						Earendil	20210719_AHS1_WT	Earendil_a::0	WT::OP50::20::heat_stress	a::0	0	a	3.17344	1.11094	1.98438	1.98438	WT		OP50			20	32		heat_stress				0	1		0	-0.023819
																						Earendil	20210719_AHS1_WT	Earendil_a::0	WT::OP50::20::heat_stress	a::0	0	a	3.17344	1.11094	1.98438	1.98438	WT		OP50			20	32		heat_stress				0	1		0	-0.023819
																						Earendil	20210719_AHS1_WT	Earendil_a::0	WT::OP50::20::heat_stress	a::0	0	a	3.17344	1.11094	1.98438	1.98438	WT		OP50			20	32		heat_stress				0	1		0	-0.023819
																						Earendil	20210719_AHS1_WT	Earendil_a::0	WT::OP50::20::heat_stress	a::0	0	a	3.17344	1.11094	1.98438	1.98438	WT		OP50			20	32		heat_stress				0	1		0	-0.023819
																						Earendil	20210719_AHS1_WT	Earendil_a::0	WT::OP50::20::heat_stress	a::0	0	a	3.17344	1.11094	1.98438	1.98438	WT		OP50			20	32		heat_stress				0	1		0	-0.023819
																						Earendil	20210719_AHS1_WT	Earendil_a::0	WT::OP50::20::heat_stress	a::0	0	a	3.17344	1.11094	1.98438	1.98438	WT		OP50			20	32		heat_stress				0	1		0	-0.023819
																						Earendil	20210719_AHS1_WT	Earendil_a::0	WT::OP50::20::heat_stress	a::0	0	a	3.17344	1.11094	1.98438	1.98438	WT		OP50			20	32		heat_stress				0	1		0	-0.002986
																						Earendil	20210719_AHS1_WT	Earendil_a::0	WT::OP50::20::heat_stress	a::0	0	a	3.17344	1.11094	1.98438	1.98438	WT		OP50			20	32		heat_stress				0	1		0	-0.023819
																						Earendil	20210719_AHS1_WT	Earendil_a::0	WT::OP50::20::heat_stress	a::0	0	a	3.17344	1.11094	1.98438	1.98438	WT		OP50			20	32		heat_stress				0	1		0	-0.023819
																						Earendil	20210719_AHS1_WT	Earendil_a::0	WT::OP50::20::heat_stress	a::0	0	a	3.17344	1.11094	1.98438	1.98438	WT		OP50			20	32		heat_stress				0	1		0	-0.023819
																						Earendil	20210719_AHS1_WT	Earendil_a::0	WT::OP50::20::heat_stress	a::0	0	a	3.17344	1.11094	1.98438	1.98438	WT		OP50			20	32		heat_stress				0	1		0	0.080347
																						Earendil	20210719_AHS1_WT	Earendil_a::0	WT::OP50::20::heat_stress	a::0	0	a	3.17344	1.11094	1.98438	1.98438	WT		OP50			20	32		heat_stress				0	1		0	-0.023819
																						Earendil	20210719_AHS1_WT	Earendil_a::0	WT::OP50::20::heat_stress	a::0	0	a	3.17344	1.11094	1.98438	1.98438	WT		OP50			20	32		heat_stress				0	0		0	0.038681
																						Earendil	20210719_AHS1_WT	Earendil_a::0	WT::OP50::20::heat_stress	a::0	0	a	3.17344	1.11094	1.98438	1.98438	WT		OP50			20	32		heat_stress				0	1		0	0.330347
																						Earendil	20210719_AHS1_WT	Earendil_a::0	WT::OP50::20::heat_stress	a::0	0	a	3.17344	1.11094	1.98438	1.98438	WT		OP50			20	32		heat_stress				0	1		0	0.163681
																						Earendil	20210719_AHS1_WT	Earendil_a::0	WT::OP50::20::heat_stress	a::0	0	a	3.17344	1.11094	1.98438	1.98438	WT		OP50			20	32		heat_stress				0	1		0	0.205347
																						Earendil	20210719_AHS1_WT	Earendil_a::0	WT::OP50::20::heat_stress	a::0	0	a	3.17344	1.11094	1.98438	1.98438	WT		OP50			20	32		heat_stress				0	1		0	-0.023819
																						Earendil	20210719_AHS1_WT	Earendil_a::0	WT::OP50::20::heat_stress	a::0	0	a	3.17344	1.11094	1.98438	1.98438	WT		OP50			20	32		heat_stress				0	1		0	0.205347
																						Earendil	20210719_AHS1_WT	Earendil_a::0	WT::OP50::20::heat_stress	a::0	0	a	3.17344	1.11094	1.98438	1.98438	WT		OP50			20	32		heat_stress				0	1		0	-0.002986
																						Earendil	20210719_AHS1_WT	Earendil_a::0	WT::OP50::20::heat_stress	a::0	0	a	3.17344	1.11094	1.98438	1.98438	WT		OP50			20	32		heat_stress				0	1		0	0.663681
																						Earendil	20210719_AHS1_WT	Earendil_a::0	WT::OP50::20::heat_stress	a::0	0	a	3.17344	1.11094	1.98438	1.98438	WT		OP50			20	32		heat_stress				0	0		0	-0.023819
																						Earendil	20210719_AHS1_WT	Earendil_a::0	WT::OP50::20::heat_stress	a::0	0	a	3.17344	1.11094	1.98438	1.98438	WT		OP50			20	32		heat_stress				0	1		0	-0.023819
																						Earendil	20210719_AHS1_WT	Earendil_a::0	WT::OP50::20::heat_stress	a::0	0	a	3.17344	1.11094	1.98438	1.98438	WT		OP50			20	32		heat_stress				0	1		0	-0.023819
																						Earendil	20210719_AHS1_WT	Earendil_a::0	WT::OP50::20::heat_stress	a::0	0	a	3.17344	1.11094	1.98438	1.98438	WT		OP50			20	32		heat_stress				0	1		0	0.622014
																						Earendil	20210719_AHS1_WT	Earendil_a::0	WT::OP50::20::heat_stress	a::0	0	a	3.17344	1.11094	1.98438	1.98438	WT		OP50			20	32		heat_stress				0	1		0	-0.023819
																						Earendil	20210719_AHS1_WT	Earendil_a::0	WT::OP50::20::heat_stress	a::0	0	a	3.17344	1.11094	1.98438	1.98438	WT		OP50			20	32		heat_stress				0	1		0	0.122014
																						Earendil	20210719_AHS1_WT	Earendil_a::0	WT::OP50::20::heat_stress	a::0	0	a	3.17344	1.11094	1.98438	1.98438	WT		OP50			20	32		heat_stress				0	1		0	0.455347
																						Earendil	20210719_AHS1_WT	Earendil_a::0	WT::OP50::20::heat_stress	a::0	0	a	3.17344	1.11094	1.98438	1.98438	WT		OP50			20	32		heat_stress				0	1	Extra worm from multiple-worm disambiguation	0	-0.023819
																						Earendil	20210719_AHS1_WT	Earendil_a::0	WT::OP50::20::heat_stress	a::0	0	a	3.17344	1.11094	1.98438	1.98438	WT		OP50			20	32		heat_stress				0	1		0	0.080347
																						Earendil	20210719_AHS1_WT	Earendil_a::0	WT::OP50::20::heat_stress	a::0	0	a	3.17344	1.11094	1.98438	1.98438	WT		OP50			20	32		heat_stress				0	1		0	-0.002986
																						Earendil	20210719_AHS1_WT	Earendil_a::0	WT::OP50::20::heat_stress	a::0	0	a	3.17344	1.11094	1.98438	1.98438	WT		OP50			20	32		heat_stress				0	1		0	0.538681
																						Earendil	20210719_AHS1_WT	Earendil_a::0	WT::OP50::20::heat_stress	a::0	0	a	3.17344	1.11094	1.98438	1.98438	WT		OP50			20	32		heat_stress				0	1		0	-0.002986
																						Earendil	20210719_AHS1_WT	Earendil_a::0	WT::OP50::20::heat_stress	a::0	0	a	3.17344	1.11094	1.98438	1.98438	WT		OP50			20	32		heat_stress				0	1		0	-0.023819
																						Earendil	20210719_AHS1_WT	Earendil_a::0	WT::OP50::20::heat_stress	a::0	0	a	3.17344	1.11094	1.98438	1.98438	WT		OP50			20	32		heat_stress				0	0		0	0.080347
																						Earendil	20210719_AHS1_WT	Earendil_a::0	WT::OP50::20::heat_stress	a::0	0	a	3.17344	1.11094	1.98438	1.98438	WT		OP50			20	32		heat_stress				0	1		0	0.080347
																						Earendil	20210719_AHS1_WT	Earendil_a::0	WT::OP50::20::heat_stress	a::0	0	a	3.17344	1.11094	1.98438	1.98438	WT		OP50			20	32		heat_stress				0	1		0	0.080347
																						Earendil	20210719_AHS1_WT	Earendil_a::0	WT::OP50::20::heat_stress	a::0	0	a	3.17344	1.11094	1.98438	1.98438	WT		OP50			20	32		heat_stress				0	1		0	0.038681
																						Earendil	20210719_AHS1_WT	Earendil_a::0	WT::OP50::20::heat_stress	a::0	0	a	3.17344	1.11094	1.98438	1.98438	WT		OP50			20	32		heat_stress				0	1		0	0.038681
																						Earendil	20210719_AHS1_WT	Earendil_a::0	WT::OP50::20::heat_stress	a::0	0	a	3.17344	1.11094	1.98438	1.98438	WT		OP50			20	32		heat_stress				0	0		0	0.163681
																						Earendil	20210719_AHS1_WT	Earendil_a::0	WT::OP50::20::heat_stress	a::0	0	a	3.17344	1.11094	1.98438	1.98438	WT		OP50			20	32		heat_stress				0	1		0	-0.002986
																						Earendil	20210719_AHS1_WT	Earendil_b::1	col9910X::OP50::20::heat_stress	b::1	1	b	5.25469	3.48438	1.98438	1.9875	col9910X		OP50			20	32		heat_stress				0	1		0	0.226181
																						Earendil	20210719_AHS1_WT	Earendil_b::1	col9910X::OP50::20::heat_stress	b::1	1	b	5.25469	3.48438	1.98438	1.9875	col9910X		OP50			20	32		heat_stress				0	1		0	0.059514
																						Earendil	20210719_AHS1_WT	Earendil_b::1	col9910X::OP50::20::heat_stress	b::1	1	b	5.25469	3.48438	1.98438	1.9875	col9910X		OP50			20	32		heat_stress				0	1		0	0.059514
																						Earendil	20210719_AHS1_WT	Earendil_b::1	col9910X::OP50::20::heat_stress	b::1	1	b	5.25469	3.48438	1.98438	1.9875	col9910X		OP50			20	32		heat_stress				0	1		0	0.017847
																						Earendil	20210719_AHS1_WT	Earendil_b::1	col9910X::OP50::20::heat_stress	b::1	1	b	5.25469	3.48438	1.98438	1.9875	col9910X		OP50			20	32		heat_stress				0	1		0	-0.002986
																						Earendil	20210719_AHS1_WT	Earendil_b::1	col9910X::OP50::20::heat_stress	b::1	1	b	5.25469	3.48438	1.98438	1.9875	col9910X		OP50			20	32		heat_stress				0	1		0	0.059514
																						Earendil	20210719_AHS1_WT	Earendil_b::1	col9910X::OP50::20::heat_stress	b::1	1	b	5.25469	3.48438	1.98438	1.9875	col9910X		OP50			20	32		heat_stress				0	1		0	-0.002986
																						Earendil	20210719_AHS1_WT	Earendil_b::1	col9910X::OP50::20::heat_stress	b::1	1	b	5.25469	3.48438	1.98438	1.9875	col9910X		OP50			20	32		heat_stress				0	1		0	-0.002986
																						Earendil	20210719_AHS1_WT	Earendil_b::1	col9910X::OP50::20::heat_stress	b::1	1	b	5.25469	3.48438	1.98438	1.9875	col9910X		OP50			20	32		heat_stress				0	1		0	-0.002986
																						Earendil	20210719_AHS1_WT	Earendil_b::1	col9910X::OP50::20::heat_stress	b::1	1	b	5.25469	3.48438	1.98438	1.9875	col9910X		OP50			20	32		heat_stress				0	1		0	0.059514
																						Earendil	20210719_AHS1_WT	Earendil_b::1	col9910X::OP50::20::heat_stress	b::1	1	b	5.25469	3.48438	1.98438	1.9875	col9910X		OP50			20	32		heat_stress				0	0		0	0.601181
																						Earendil	20210719_AHS1_WT	Earendil_b::1	col9910X::OP50::20::heat_stress	b::1	1	b	5.25469	3.48438	1.98438	1.9875	col9910X		OP50			20	32		heat_stress				0	1		0	0.101181
																						Earendil	20210719_AHS1_WT	Earendil_b::1	col9910X::OP50::20::heat_stress	b::1	1	b	5.25469	3.48438	1.98438	1.9875	col9910X		OP50			20	32		heat_stress				0	1		0	0.226181
																						Earendil	20210719_AHS1_WT	Earendil_b::1	col9910X::OP50::20::heat_stress	b::1	1	b	5.25469	3.48438	1.98438	1.9875	col9910X		OP50			20	32		heat_stress				0	1		0	-0.002986
																						Earendil	20210719_AHS1_WT	Earendil_b::1	col9910X::OP50::20::heat_stress	b::1	1	b	5.25469	3.48438	1.98438	1.9875	col9910X		OP50			20	32		heat_stress				0	0		0	0.017847
																						Earendil	20210719_AHS1_WT	Earendil_b::1	col9910X::OP50::20::heat_stress	b::1	1	b	5.25469	3.48438	1.98438	1.9875	col9910X		OP50			20	32		heat_stress				0	1		0	-0.002986
																						Earendil	20210719_AHS1_WT	Earendil_b::1	col9910X::OP50::20::heat_stress	b::1	1	b	5.25469	3.48438	1.98438	1.9875	col9910X		OP50			20	32		heat_stress				0	1		0	0.601181
																						Earendil	20210719_AHS1_WT	Earendil_b::1	col9910X::OP50::20::heat_stress	b::1	1	b	5.25469	3.48438	1.98438	1.9875	col9910X		OP50			20	32		heat_stress				0	1		0	-0.002986
																						Earendil	20210719_AHS1_WT	Earendil_b::1	col9910X::OP50::20::heat_stress	b::1	1	b	5.25469	3.48438	1.98438	1.9875	col9910X		OP50			20	32		heat_stress				0	1		0	0.476181
																						Earendil	20210719_AHS1_WT	Earendil_b::1	col9910X::OP50::20::heat_stress	b::1	1	b	5.25469	3.48438	1.98438	1.9875	col9910X		OP50			20	32		heat_stress				0	1		0	-0.002986
																						Earendil	20210719_AHS1_WT	Earendil_b::1	col9910X::OP50::20::heat_stress	b::1	1	b	5.25469	3.48438	1.98438	1.9875	col9910X		OP50			20	32		heat_stress				0	1		0	-0.002986
																						Earendil	20210719_AHS1_WT	Earendil_b::1	col9910X::OP50::20::heat_stress	b::1	1	b	5.25469	3.48438	1.98438	1.9875	col9910X		OP50			20	32		heat_stress				0	1		0	0.017847
																						Earendil	20210719_AHS1_WT	Earendil_b::1	col9910X::OP50::20::heat_stress	b::1	1	b	5.25469	3.48438	1.98438	1.9875	col9910X		OP50			20	32		heat_stress				0	1		0	0.309514
																						Earendil	20210719_AHS1_WT	Earendil_b::1	col9910X::OP50::20::heat_stress	b::1	1	b	5.25469	3.48438	1.98438	1.9875	col9910X		OP50			20	32		heat_stress				0	1		0	2.26785
																						Earendil	20210719_AHS1_WT	Earendil_b::1	col9910X::OP50::20::heat_stress	b::1	1	b	5.25469	3.48438	1.98438	1.9875	col9910X		OP50			20	32		heat_stress				0	1		0	0.184514
																						Earendil	20210719_AHS1_WT	Earendil_b::1	col9910X::OP50::20::heat_stress	b::1	1	b	5.25469	3.48438	1.98438	1.9875	col9910X		OP50			20	32		heat_stress				0	1		0	0.101181
																						Earendil	20210719_AHS1_WT	Earendil_b::1	col9910X::OP50::20::heat_stress	b::1	1	b	5.25469	3.48438	1.98438	1.9875	col9910X		OP50			20	32		heat_stress				0	1		0	-0.002986
																						Earendil	20210719_AHS1_WT	Earendil_b::1	col9910X::OP50::20::heat_stress	b::1	1	b	5.25469	3.48438	1.98438	1.9875	col9910X		OP50			20	32		heat_stress				0	1		0	0.059514
																						Earendil	20210719_AHS1_WT	Earendil_b::1	col9910X::OP50::20::heat_stress	b::1	1	b	5.25469	3.48438	1.98438	1.9875	col9910X		OP50			20	32		heat_stress				0	1		0	-0.002986
																						Earendil	20210719_AHS1_WT	Earendil_b::1	col9910X::OP50::20::heat_stress	b::1	1	b	5.25469	3.48438	1.98438	1.9875	col9910X		OP50			20	32		heat_stress				0	1		0	-0.002986
																						Earendil	20210719_AHS1_WT	Earendil_b::1	col9910X::OP50::20::heat_stress	b::1	1	b	5.25469	3.48438	1.98438	1.9875	col9910X		OP50			20	32		heat_stress				0	1		0	0.017847
																						Earendil	20210719_AHS1_WT	Earendil_b::1	col9910X::OP50::20::heat_stress	b::1	1	b	5.25469	3.48438	1.98438	1.9875	col9910X		OP50			20	32		heat_stress				0	1		0	0.309514
																						Earendil	20210719_AHS1_WT	Earendil_b::1	col9910X::OP50::20::heat_stress	b::1	1	b	5.25469	3.48438	1.98438	1.9875	col9910X		OP50			20	32		heat_stress				0	1		0	0.101181
																						Earendil	20210719_AHS1_WT	Earendil_b::1	col9910X::OP50::20::heat_stress	b::1	1	b	5.25469	3.48438	1.98438	1.9875	col9910X		OP50			20	32		heat_stress				0	1		0	-0.002986
																						Earendil	20210719_AHS1_WT	Earendil_b::1	col9910X::OP50::20::heat_stress	b::1	1	b	5.25469	3.48438	1.98438	1.9875	col9910X		OP50			20	32		heat_stress				0	1		0	-0.002986
																						Earendil	20210719_AHS1_WT	Earendil_b::1	col9910X::OP50::20::heat_stress	b::1	1	b	5.25469	3.48438	1.98438	1.9875	col9910X		OP50			20	32		heat_stress				0	1		0	-0.002986
																						Earendil	20210719_AHS1_WT	Earendil_b::1	col9910X::OP50::20::heat_stress	b::1	1	b	5.25469	3.48438	1.98438	1.9875	col9910X		OP50			20	32		heat_stress				0	1		0	1.85118
																						Earendil	20210719_AHS1_WT	Earendil_b::1	col9910X::OP50::20::heat_stress	b::1	1	b	5.25469	3.48438	1.98438	1.9875	col9910X		OP50			20	32		heat_stress				0	1		0	0.226181
																						Earendil	20210719_AHS1_WT	Earendil_b::1	col9910X::OP50::20::heat_stress	b::1	1	b	5.25469	3.48438	1.98438	1.9875	col9910X		OP50			20	32		heat_stress				0	1		0	0.101181
																						Earendil	20210719_AHS1_WT	Earendil_b::1	col9910X::OP50::20::heat_stress	b::1	1	b	5.25469	3.48438	1.98438	1.9875	col9910X		OP50			20	32		heat_stress				0	1		0	-0.002986
																						Earendil	20210719_AHS1_WT	Earendil_b::1	col9910X::OP50::20::heat_stress	b::1	1	b	5.25469	3.48438	1.98438	1.9875	col9910X		OP50			20	32		heat_stress				0	1		0	-0.002986
																						Earendil	20210719_AHS1_WT	Earendil_b::1	col9910X::OP50::20::heat_stress	b::1	1	b	5.25469	3.48438	1.98438	1.9875	col9910X		OP50			20	32		heat_stress				0	1		0	-0.002986
																						Earendil	20210719_AHS1_WT	Earendil_b::1	col9910X::OP50::20::heat_stress	b::1	1	b	5.25469	3.48438	1.98438	1.9875	col9910X		OP50			20	32		heat_stress				0	1		0	0.142847
																						Earendil	20210719_AHS1_WT	Earendil_b::1	col9910X::OP50::20::heat_stress	b::1	1	b	5.25469	3.48438	1.98438	1.9875	col9910X		OP50			20	32		heat_stress				0	1		0	0.267847
																						Earendil	20210719_AHS1_WT	Earendil_b::1	col9910X::OP50::20::heat_stress	b::1	1	b	5.25469	3.48438	1.98438	1.9875	col9910X		OP50			20	32		heat_stress				0	1		0	1.39285
																						Earendil	20210719_AHS1_WT	Earendil_b::1	col9910X::OP50::20::heat_stress	b::1	1	b	5.25469	3.48438	1.98438	1.9875	col9910X		OP50			20	32		heat_stress				0	1		0	0.017847
																						Earendil	20210719_AHS1_WT	Earendil_b::1	col9910X::OP50::20::heat_stress	b::1	1	b	5.25469	3.48438	1.98438	1.9875	col9910X		OP50			20	32		heat_stress				0	1		0	0.101181
																						Earendil	20210719_AHS1_WT	Earendil_b::1	col9910X::OP50::20::heat_stress	b::1	1	b	5.25469	3.48438	1.98438	1.9875	col9910X		OP50			20	32		heat_stress				0	1		0	0.059514
																						Earendil	20210719_AHS1_WT	Earendil_b::1	col9910X::OP50::20::heat_stress	b::1	1	b	5.25469	3.48438	1.98438	1.9875	col9910X		OP50			20	32		heat_stress				0	1		0	0.101181
																						Earendil	20210719_AHS1_WT	Earendil_b::1	col9910X::OP50::20::heat_stress	b::1	1	b	5.25469	3.48438	1.98438	1.9875	col9910X		OP50			20	32		heat_stress				0	1		0	0.142847
																						Earendil	20210719_AHS1_WT	Earendil_b::1	col9910X::OP50::20::heat_stress	b::1	1	b	5.25469	3.48438	1.98438	1.9875	col9910X		OP50			20	32		heat_stress				0	1		0	0.101181
																						Earendil	20210719_AHS1_WT	Earendil_b::1	col9910X::OP50::20::heat_stress	b::1	1	b	5.25469	3.48438	1.98438	1.9875	col9910X		OP50			20	32		heat_stress				0	1		0	-0.002986
																						Earendil	20210719_AHS1_WT	Earendil_b::1	col9910X::OP50::20::heat_stress	b::1	1	b	5.25469	3.48438	1.98438	1.9875	col9910X		OP50			20	32		heat_stress				0	1		0	-0.002986
																						Earendil	20210719_AHS1_WT	Earendil_b::1	col9910X::OP50::20::heat_stress	b::1	1	b	5.25469	3.48438	1.98438	1.9875	col9910X		OP50			20	32		heat_stress				0	1		0	0.017847
																						Earendil	20210719_AHS1_WT	Earendil_b::1	col9910X::OP50::20::heat_stress	b::1	1	b	5.25469	3.48438	1.98438	1.9875	col9910X		OP50			20	32		heat_stress				0	1		0	1.14285
																						Earendil	20210719_AHS1_WT	Earendil_b::1	col9910X::OP50::20::heat_stress	b::1	1	b	5.25469	3.48438	1.98438	1.9875	col9910X		OP50			20	32		heat_stress				0	1		0	0.351181
																						Earendil	20210719_AHS1_WT	Earendil_b::1	col9910X::OP50::20::heat_stress	b::1	1	b	5.25469	3.48438	1.98438	1.9875	col9910X		OP50			20	32		heat_stress				0	1		0	-0.002986
																						Earendil	20210719_AHS1_WT	Earendil_b::1	col9910X::OP50::20::heat_stress	b::1	1	b	5.25469	3.48438	1.98438	1.9875	col9910X		OP50			20	32		heat_stress				0	1		0	-0.002986
																						Earendil	20210719_AHS1_WT	Earendil_b::1	col9910X::OP50::20::heat_stress	b::1	1	b	5.25469	3.48438	1.98438	1.9875	col9910X		OP50			20	32		heat_stress				0	0		0	0.101181
																						Earendil	20210719_AHS1_WT	Earendil_b::1	col9910X::OP50::20::heat_stress	b::1	1	b	5.25469	3.48438	1.98438	1.9875	col9910X		OP50			20	32		heat_stress				0	1		0	0.851181
																						Earendil	20210719_AHS1_WT	Earendil_b::1	col9910X::OP50::20::heat_stress	b::1	1	b	5.25469	3.48438	1.98438	1.9875	col9910X		OP50			20	32		heat_stress				0	0		0	0.684514
																						Earendil	20210719_AHS1_WT	Earendil_b::1	col9910X::OP50::20::heat_stress	b::1	1	b	5.25469	3.48438	1.98438	1.9875	col9910X		OP50			20	32		heat_stress				0	1		0	-0.002986
																						Earendil	20210719_AHS1_WT	Earendil_b::1	col9910X::OP50::20::heat_stress	b::1	1	b	5.25469	3.48438	1.98438	1.9875	col9910X		OP50			20	32		heat_stress				0	0		0	0.517847
																						Earendil	20210719_AHS1_WT	Earendil_b::1	col9910X::OP50::20::heat_stress	b::1	1	b	5.25469	3.48438	1.98438	1.9875	col9910X		OP50			20	32		heat_stress				0	1		0	-0.002986
																						Earendil	20210719_AHS1_WT	Earendil_b::1	col9910X::OP50::20::heat_stress	b::1	1	b	5.25469	3.48438	1.98438	1.9875	col9910X		OP50			20	32		heat_stress				0	1		0	0.267847
																						Earendil	20210719_AHS1_WT	Earendil_b::1	col9910X::OP50::20::heat_stress	b::1	1	b	5.25469	3.48438	1.98438	1.9875	col9910X		OP50			20	32		heat_stress				0	1		0	0.517847
																						Earendil	20210719_AHS1_WT	Earendil_b::1	col9910X::OP50::20::heat_stress	b::1	1	b	5.25469	3.48438	1.98438	1.9875	col9910X		OP50			20	32		heat_stress				0	1		0	0.726181
																						Earendil	20210719_AHS1_WT	Earendil_b::1	col9910X::OP50::20::heat_stress	b::1	1	b	5.25469	3.48438	1.98438	1.9875	col9910X		OP50			20	32		heat_stress				0	0		0	0.684514
																						Earendil	20210719_AHS1_WT	Earendil_b::1	col9910X::OP50::20::heat_stress	b::1	1	b	5.25469	3.48438	1.98438	1.9875	col9910X		OP50			20	32		heat_stress				0	1		0	0.684514
																						Earendil	20210719_AHS1_WT	Earendil_b::1	col9910X::OP50::20::heat_stress	b::1	1	b	5.25469	3.48438	1.98438	1.9875	col9910X		OP50			20	32		heat_stress				0	0		0	0.642847
																						Earendil	20210719_AHS1_WT	Earendil_b::1	col9910X::OP50::20::heat_stress	b::1	1	b	5.25469	3.48438	1.98438	1.9875	col9910X		OP50			20	32		heat_stress				0	1		0	0.017847
																						Earendil	20210719_AHS1_WT	Earendil_b::1	col9910X::OP50::20::heat_stress	b::1	1	b	5.25469	3.48438	1.98438	1.9875	col9910X		OP50			20	32		heat_stress				0	0		0	0.559514
																						Earendil	20210719_AHS1_WT	Earendil_b::1	col9910X::OP50::20::heat_stress	b::1	1	b	5.25469	3.48438	1.98438	1.9875	col9910X		OP50			20	32		heat_stress				0	0		0	0.642847
																						Earendil	20210719_AHS1_WT	Earendil_b::1	col9910X::OP50::20::heat_stress	b::1	1	b	5.25469	3.48438	1.98438	1.9875	col9910X		OP50			20	32		heat_stress				0	0		0	0.559514
																						Earendil	20210719_AHS1_WT	Earendil_b::1	col9910X::OP50::20::heat_stress	b::1	1	b	5.25469	3.48438	1.98438	1.9875	col9910X		OP50			20	32		heat_stress				0	0		0	0.476181
																						Earendil	20210719_AHS1_WT	Earendil_b::1	col9910X::OP50::20::heat_stress	b::1	1	b	5.25469	3.48438	1.98438	1.9875	col9910X		OP50			20	32		heat_stress				0	0		0	0.642847
																						Earendil	20210719_AHS1_WT	Earendil_b::1	col9910X::OP50::20::heat_stress	b::1	1	b	5.25469	3.48438	1.98438	1.9875	col9910X		OP50			20	32		heat_stress				0	0		0	0.559514
																						Earendil	20210719_AHS1_WT	Earendil_b::1	col9910X::OP50::20::heat_stress	b::1	1	b	5.25469	3.48438	1.98438	1.9875	col9910X		OP50			20	32		heat_stress				0	1		0	0.517847
																						Earendil	20210719_AHS1_WT	Earendil_b::1	col9910X::OP50::20::heat_stress	b::1	1	b	5.25469	3.48438	1.98438	1.9875	col9910X		OP50			20	32		heat_stress				0	0		0	0.601181
																						Earendil	20210719_AHS1_WT	Earendil_b::1	col9910X::OP50::20::heat_stress	b::1	1	b	5.25469	3.48438	1.98438	1.9875	col9910X		OP50			20	32		heat_stress				0	0		0	0.559514
																						Earendil	20210719_AHS1_WT	Earendil_b::1	col9910X::OP50::20::heat_stress	b::1	1	b	5.25469	3.48438	1.98438	1.9875	col9910X		OP50			20	32		heat_stress				0	1		0	0.017847
																						Earendil	20210719_AHS1_WT	Earendil_b::1	col9910X::OP50::20::heat_stress	b::1	1	b	5.25469	3.48438	1.98438	1.9875	col9910X		OP50			20	32		heat_stress				0	1		0	0.059514
																						Earendil	20210719_AHS1_WT	Earendil_b::1	col9910X::OP50::20::heat_stress	b::1	1	b	5.25469	3.48438	1.98438	1.9875	col9910X		OP50			20	32		heat_stress				0	1		0	0.267847
																						Earendil	20210719_AHS1_WT	Earendil_b::1	col9910X::OP50::20::heat_stress	b::1	1	b	5.25469	3.48438	1.98438	1.9875	col9910X		OP50			20	32		heat_stress				0	1		0	0.142847
																						Earendil	20210719_AHS1_WT	Earendil_b::1	col9910X::OP50::20::heat_stress	b::1	1	b	5.25469	3.48438	1.98438	1.9875	col9910X		OP50			20	32		heat_stress				0	1		0	0.101181
																						Earendil	20210719_AHS1_WT	Earendil_b::1	col9910X::OP50::20::heat_stress	b::1	1	b	5.25469	3.48438	1.98438	1.9875	col9910X		OP50			20	32		heat_stress				0	0		0	0.517847
																						Earendil	20210719_AHS1_WT	Earendil_b::1	col9910X::OP50::20::heat_stress	b::1	1	b	5.25469	3.48438	1.98438	1.9875	col9910X		OP50			20	32		heat_stress				0	0		0	0.517847
																						Earendil	20210719_AHS1_WT	Earendil_b::1	col9910X::OP50::20::heat_stress	b::1	1	b	5.25469	3.48438	1.98438	1.9875	col9910X		OP50			20	32		heat_stress				0	0		0	0.559514
																						Earendil	20210719_AHS1_WT	Earendil_b::1	col9910X::OP50::20::heat_stress	b::1	1	b	5.25469	3.48438	1.98438	1.9875	col9910X		OP50			20	32		heat_stress				0	1		0	0.517847
																						Earendil	20210719_AHS1_WT	Earendil_b::1	col9910X::OP50::20::heat_stress	b::1	1	b	5.25469	3.48438	1.98438	1.9875	col9910X		OP50			20	32		heat_stress				0	0		0	0.559514
																						Earendil	20210719_AHS1_WT	Earendil_b::1	col9910X::OP50::20::heat_stress	b::1	1	b	5.25469	3.48438	1.98438	1.9875	col9910X		OP50			20	32		heat_stress				0	0		0	0.476181
																						Earendil	20210719_AHS1_WT	Earendil_b::1	col9910X::OP50::20::heat_stress	b::1	1	b	5.25469	3.48438	1.98438	1.9875	col9910X		OP50			20	32		heat_stress				0	1		0	-0.002986
																						Earendil	20210719_AHS1_WT	Earendil_b::1	col9910X::OP50::20::heat_stress	b::1	1	b	5.25469	3.48438	1.98438	1.9875	col9910X		OP50			20	32		heat_stress				0	1		0	0.267847
																						Earendil	20210719_AHS1_WT	Earendil_b::1	col9910X::OP50::20::heat_stress	b::1	1	b	5.25469	3.48438	1.98438	1.9875	col9910X		OP50			20	32		heat_stress				0	1		0	0.476181
																						Earendil	20210719_AHS1_WT	Earendil_b::1	col9910X::OP50::20::heat_stress	b::1	1	b	5.25469	3.48438	1.98438	1.9875	col9910X		OP50			20	32		heat_stress				0	1		0	-0.002986
																						Earendil	20210719_AHS1_WT	Earendil_b::1	col9910X::OP50::20::heat_stress	b::1	1	b	5.25469	3.48438	1.98438	1.9875	col9910X		OP50			20	32		heat_stress				0	0		0	0.517847
																						Earendil	20210719_AHS1_WT	Earendil_b::1	col9910X::OP50::20::heat_stress	b::1	1	b	5.25469	3.48438	1.98438	1.9875	col9910X		OP50			20	32		heat_stress				0	0		0	0.476181
																						Earendil	20210719_AHS1_WT	Earendil_b::1	col9910X::OP50::20::heat_stress	b::1	1	b	5.25469	3.48438	1.98438	1.9875	col9910X		OP50			20	32		heat_stress				0	0		0	0.517847
																						Earendil	20210719_AHS1_WT	Earendil_b::1	col9910X::OP50::20::heat_stress	b::1	1	b	5.25469	3.48438	1.98438	1.9875	col9910X		OP50			20	32		heat_stress				0	1		0	0.517847
																						Earendil	20210719_AHS1_WT	Earendil_b::1	col9910X::OP50::20::heat_stress	b::1	1	b	5.25469	3.48438	1.98438	1.9875	col9910X		OP50			20	32		heat_stress				0	1		0	0.017847
																						Earendil	20210719_AHS1_WT	Earendil_b::1	col9910X::OP50::20::heat_stress	b::1	1	b	5.25469	3.48438	1.98438	1.9875	col9910X		OP50			20	32		heat_stress				0	0		0	0.434514
																						Earendil	20210719_AHS1_WT	Earendil_b::1	col9910X::OP50::20::heat_stress	b::1	1	b	5.25469	3.48438	1.98438	1.9875	col9910X		OP50			20	32		heat_stress				0	0		0	0.476181
																						Earendil	20210719_AHS1_WT	Earendil_b::1	col9910X::OP50::20::heat_stress	b::1	1	b	5.25469	3.48438	1.98438	1.9875	col9910X		OP50			20	32		heat_stress				0	1		0	-0.002986
																						Earendil	20210719_AHS1_WT	Earendil_b::1	col9910X::OP50::20::heat_stress	b::1	1	b	5.25469	3.48438	1.98438	1.9875	col9910X		OP50			20	32		heat_stress				0	1		0	0.267847
																						Earendil	20210719_AHS1_WT	Earendil_b::1	col9910X::OP50::20::heat_stress	b::1	1	b	5.25469	3.48438	1.98438	1.9875	col9910X		OP50			20	32		heat_stress				0	0		0	0.392847
																						Earendil	20210719_AHS1_WT	Earendil_b::1	col9910X::OP50::20::heat_stress	b::1	1	b	5.25469	3.48438	1.98438	1.9875	col9910X		OP50			20	32		heat_stress				0	0		0	0.017847
																						Earendil	20210719_AHS1_WT	Earendil_b::1	col9910X::OP50::20::heat_stress	b::1	1	b	5.25469	3.48438	1.98438	1.9875	col9910X		OP50			20	32		heat_stress				0	1		0	0.434514
																						Earendil	20210719_AHS1_WT	Earendil_b::1	col9910X::OP50::20::heat_stress	b::1	1	b	5.25469	3.48438	1.98438	1.9875	col9910X		OP50			20	32		heat_stress				0	1		0	0.434514
																						Earendil	20210719_AHS1_WT	Earendil_b::1	col9910X::OP50::20::heat_stress	b::1	1	b	5.25469	3.48438	1.98438	1.9875	col9910X		OP50			20	32		heat_stress				0	1		0	0.434514
																						Earendil	20210719_AHS1_WT	Earendil_b::1	col9910X::OP50::20::heat_stress	b::1	1	b	5.25469	3.48438	1.98438	1.9875	col9910X		OP50			20	32		heat_stress				0	1		0	-0.002986
																						Earendil	20210719_AHS1_WT	Earendil_b::1	col9910X::OP50::20::heat_stress	b::1	1	b	5.25469	3.48438	1.98438	1.9875	col9910X		OP50			20	32		heat_stress				0	1		0	-0.002986
																						Earendil	20210719_AHS1_WT	Earendil_b::1	col9910X::OP50::20::heat_stress	b::1	1	b	5.25469	3.48438	1.98438	1.9875	col9910X		OP50			20	32		heat_stress				0	1		0	-0.002986
																						Earendil	20210719_AHS1_WT	Earendil_b::1	col9910X::OP50::20::heat_stress	b::1	1	b	5.25469	3.48438	1.98438	1.9875	col9910X		OP50			20	32		heat_stress				0	0		0	0.351181
																						Earendil	20210719_AHS1_WT	Earendil_b::1	col9910X::OP50::20::heat_stress	b::1	1	b	5.25469	3.48438	1.98438	1.9875	col9910X		OP50			20	32		heat_stress				0	1		0	-0.002986
																						Earendil	20210719_AHS1_WT	Earendil_b::1	col9910X::OP50::20::heat_stress	b::1	1	b	5.25469	3.48438	1.98438	1.9875	col9910X		OP50			20	32		heat_stress				0	0		0	-0.002986
																						Earendil	20210719_AHS1_WT	Earendil_b::1	col9910X::OP50::20::heat_stress	b::1	1	b	5.25469	3.48438	1.98438	1.9875	col9910X		OP50			20	32		heat_stress				0	0		0	0.309514
																						Earendil	20210719_AHS1_WT	Earendil_b::1	col9910X::OP50::20::heat_stress	b::1	1	b	5.25469	3.48438	1.98438	1.9875	col9910X		OP50			20	32		heat_stress				0	1		0	0.309514
																						Earendil	20210719_AHS1_WT	Earendil_b::1	col9910X::OP50::20::heat_stress	b::1	1	b	5.25469	3.48438	1.98438	1.9875	col9910X		OP50			20	32		heat_stress				0	1		0	0.101181
																						Earendil	20210719_AHS1_WT	Earendil_b::1	col9910X::OP50::20::heat_stress	b::1	1	b	5.25469	3.48438	1.98438	1.9875	col9910X		OP50			20	32		heat_stress				0	1	Extra worm from multiple-worm disambiguation	0	0.309514
																						Earendil	20210719_AHS1_WT	Earendil_b::1	col9910X::OP50::20::heat_stress	b::1	1	b	5.25469	3.48438	1.98438	1.9875	col9910X		OP50			20	32		heat_stress				0	1		0	0.309514
																						Earendil	20210719_AHS1_WT	Earendil_b::1	col9910X::OP50::20::heat_stress	b::1	1	b	5.25469	3.48438	1.98438	1.9875	col9910X		OP50			20	32		heat_stress				0	1		0	-0.002986
																						Earendil	20210719_AHS1_WT	Earendil_b::1	col9910X::OP50::20::heat_stress	b::1	1	b	5.25469	3.48438	1.98438	1.9875	col9910X		OP50			20	32		heat_stress				0	0		0	0.017847
																						Earendil	20210719_AHS1_WT	Earendil_b::1	col9910X::OP50::20::heat_stress	b::1	1	b	5.25469	3.48438	1.98438	1.9875	col9910X		OP50			20	32		heat_stress				0	1		0	0.017847
																						Earendil	20210719_AHS1_WT	Earendil_b::1	col9910X::OP50::20::heat_stress	b::1	1	b	5.25469	3.48438	1.98438	1.9875	col9910X		OP50			20	32		heat_stress				0	1		0	0.017847
																						Earendil	20210719_AHS1_WT	Earendil_b::1	col9910X::OP50::20::heat_stress	b::1	1	b	5.25469	3.48438	1.98438	1.9875	col9910X		OP50			20	32		heat_stress				0	0		0	0.017847
																						Earendil	20210719_AHS1_WT	Earendil_b::1	col9910X::OP50::20::heat_stress	b::1	1	b	5.25469	3.48438	1.98438	1.9875	col9910X		OP50			20	32		heat_stress				0	1		0	0.059514
																						Earendil	20210719_AHS1_WT	Earendil_b::1	col9910X::OP50::20::heat_stress	b::1	1	b	5.25469	3.48438	1.98438	1.9875	col9910X		OP50			20	32		heat_stress				0	0		0	0.059514
																						Earendil	20210719_AHS1_WT	Earendil_b::1	col9910X::OP50::20::heat_stress	b::1	1	b	5.25469	3.48438	1.98438	1.9875	col9910X		OP50			20	32		heat_stress				0	1		0	-0.002986
																						Earendil	20210719_AHS1_WT	Earendil_b::1	col9910X::OP50::20::heat_stress	b::1	1	b	5.25469	3.48438	1.98438	1.9875	col9910X		OP50			20	32		heat_stress				0	0		0	0.184514
																						Earendil	20210719_AHS1_WT	Earendil_b::1	col9910X::OP50::20::heat_stress	b::1	1	b	5.25469	3.48438	1.98438	1.9875	col9910X		OP50			20	32		heat_stress				0	1		0	0.017847
																						Earendil	20210719_AHS1_WT	Earendil_b::1	col9910X::OP50::20::heat_stress	b::1	1	b	5.25469	3.48438	1.98438	1.9875	col9910X		OP50			20	32		heat_stress				0	1		0	-0.002986
																						Earendil	20210719_AHS1_WT	Earendil_b::1	col9910X::OP50::20::heat_stress	b::1	1	b	5.25469	3.48438	1.98438	1.9875	col9910X		OP50			20	32		heat_stress				0	1		0	-0.002986
																						Earendil	20210719_AHS1_WT	Earendil_b::1	col9910X::OP50::20::heat_stress	b::1	1	b	5.25469	3.48438	1.98438	1.9875	col9910X		OP50			20	32		heat_stress				0	1		0	-0.002986
																						Earendil	20210719_AHS1_WT	Earendil_b::1	col9910X::OP50::20::heat_stress	b::1	1	b	5.25469	3.48438	1.98438	1.9875	col9910X		OP50			20	32		heat_stress				0	0		0	-0.002986
																						Earendil	20210719_AHS1_WT	Earendil_b::1	col9910X::OP50::20::heat_stress	b::1	1	b	5.25469	3.48438	1.98438	1.9875	col9910X		OP50			20	32		heat_stress				0	1		0	-0.002986
																						Earendil	20210719_AHS1_WT	Earendil_b::1	col9910X::OP50::20::heat_stress	b::1	1	b	5.25469	3.48438	1.98438	1.9875	col9910X		OP50			20	32		heat_stress				0	0		0	-0.002986
																						Earendil	20210719_AHS1_WT	Earendil_b::1	col9910X::OP50::20::heat_stress	b::1	1	b	5.25469	3.48438	1.98438	1.9875	col9910X		OP50			20	32		heat_stress				0	1		0	-0.002986
																						Earendil	20210719_AHS1_WT	Earendil_b::1	col9910X::OP50::20::heat_stress	b::1	1	b	5.25469	3.48438	1.98438	1.9875	col9910X		OP50			20	32		heat_stress				0	1		0	-0.002986
																						Earendil	20210719_AHS1_WT	Earendil_b::1	col9910X::OP50::20::heat_stress	b::1	1	b	5.25469	3.48438	1.98438	1.9875	col9910X		OP50			20	32		heat_stress				0	1		0	-0.002986
																						Earendil	20210719_AHS1_WT	Earendil_b::1	col9910X::OP50::20::heat_stress	b::1	1	b	5.25469	3.48438	1.98438	1.9875	col9910X		OP50			20	32		heat_stress				0	1		0	-0.002986
																						Earendil	20210719_AHS1_WT	Earendil_b::1	col9910X::OP50::20::heat_stress	b::1	1	b	5.25469	3.48438	1.98438	1.9875	col9910X		OP50			20	32		heat_stress				0	1		0	-0.002986
																						Earendil	20210719_AHS1_WT	Earendil_b::1	col9910X::OP50::20::heat_stress	b::1	1	b	5.25469	3.48438	1.98438	1.9875	col9910X		OP50			20	32		heat_stress				0	0		0	-0.002986
																						Earendil	20210719_AHS1_WT	Earendil_b::1	col9910X::OP50::20::heat_stress	b::1	1	b	5.25469	3.48438	1.98438	1.9875	col9910X		OP50			20	32		heat_stress				0	0		0	-0.002986
																						Earendil	20210719_AHS1_WT	Earendil_b::1	col9910X::OP50::20::heat_stress	b::1	1	b	5.25469	3.48438	1.98438	1.9875	col9910X		OP50			20	32		heat_stress				0	1		0	-0.002986
																						Earendil	20210719_AHS1_WT	Earendil_b::1	col9910X::OP50::20::heat_stress	b::1	1	b	5.25469	3.48438	1.98438	1.9875	col9910X		OP50			20	32		heat_stress				0	1		0	0.017847
																						Earendil	20210719_AHS1_WT	Earendil_b::1	col9910X::OP50::20::heat_stress	b::1	1	b	5.25469	3.48438	1.98438	1.9875	col9910X		OP50			20	32		heat_stress				0	1		0	-0.002986
																						Earendil	20210719_AHS1_WT	Earendil_b::1	col9910X::OP50::20::heat_stress	b::1	1	b	5.25469	3.48438	1.98438	1.9875	col9910X		OP50			20	32		heat_stress				0	1		0	-0.002986
																						Earendil	20210719_AHS1_WT	Earendil_b::1	col9910X::OP50::20::heat_stress	b::1	1	b	5.25469	3.48438	1.98438	1.9875	col9910X		OP50			20	32		heat_stress				0	1		0	-0.002986
																						Earendil	20210719_AHS1_WT	Earendil_b::1	col9910X::OP50::20::heat_stress	b::1	1	b	5.25469	3.48438	1.98438	1.9875	col9910X		OP50			20	32		heat_stress				0	1		0	-0.002986
																						Earendil	20210719_AHS1_WT	Earendil_b::1	col9910X::OP50::20::heat_stress	b::1	1	b	5.25469	3.48438	1.98438	1.9875	col9910X		OP50			20	32		heat_stress				0	1		0	-0.002986
																						Earendil	20210719_AHS1_WT	Earendil_b::1	col9910X::OP50::20::heat_stress	b::1	1	b	5.25469	3.48438	1.98438	1.9875	col9910X		OP50			20	32		heat_stress				0	1		0	-0.002986
																						Earendil	20210719_AHS1_WT	Earendil_b::1	col9910X::OP50::20::heat_stress	b::1	1	b	5.25469	3.48438	1.98438	1.9875	col9910X		OP50			20	32		heat_stress				0	1		0	-0.002986
																						Earendil	20210719_AHS1_WT	Earendil_b::1	col9910X::OP50::20::heat_stress	b::1	1	b	5.25469	3.48438	1.98438	1.9875	col9910X		OP50			20	32		heat_stress				0	1		0	-0.002986
																						Earendil	20210719_AHS1_WT	Earendil_b::1	col9910X::OP50::20::heat_stress	b::1	1	b	5.25469	3.48438	1.98438	1.9875	col9910X		OP50			20	32		heat_stress				0	1		0	-0.002986
																						Earendil	20210719_AHS1_WT	Earendil_b::1	col9910X::OP50::20::heat_stress	b::1	1	b	5.25469	3.48438	1.98438	1.9875	col9910X		OP50			20	32		heat_stress				0	1		0	-0.002986
																						Earendil	20210719_AHS1_WT	Earendil_b::1	col9910X::OP50::20::heat_stress	b::1	1	b	5.25469	3.48438	1.98438	1.9875	col9910X		OP50			20	32		heat_stress				0	1		0	-0.002986
																						Earendil	20210719_AHS1_WT	Earendil_b::1	col9910X::OP50::20::heat_stress	b::1	1	b	5.25469	3.48438	1.98438	1.9875	col9910X		OP50			20	32		heat_stress				0	1		0	-0.002986
																						Earendil	20210719_AHS1_WT	Earendil_b::1	col9910X::OP50::20::heat_stress	b::1	1	b	5.25469	3.48438	1.98438	1.9875	col9910X		OP50			20	32		heat_stress				0	1		0	-0.002986
																						Earendil	20210719_AHS1_WT	Earendil_b::1	col9910X::OP50::20::heat_stress	b::1	1	b	5.25469	3.48438	1.98438	1.9875	col9910X		OP50			20	32		heat_stress				0	1		0	-0.002986
																						Earendil	20210719_AHS1_WT	Earendil_b::1	col9910X::OP50::20::heat_stress	b::1	1	b	5.25469	3.48438	1.98438	1.9875	col9910X		OP50			20	32		heat_stress				0	1		0	-0.002986
																						Earendil	20210719_AHS1_WT	Earendil_b::1	col9910X::OP50::20::heat_stress	b::1	1	b	5.25469	3.48438	1.98438	1.9875	col9910X		OP50			20	32		heat_stress				0	1		0	-0.002986
																						Earendil	20210719_AHS1_WT	Earendil_b::1	col9910X::OP50::20::heat_stress	b::1	1	b	5.25469	3.48438	1.98438	1.9875	col9910X		OP50			20	32		heat_stress				0	1		0	-0.002986
																						Earendil	20210719_AHS1_WT	Earendil_b::1	col9910X::OP50::20::heat_stress	b::1	1	b	5.25469	3.48438	1.98438	1.9875	col9910X		OP50			20	32		heat_stress				0	1		0	-0.002986
																						Earendil	20210719_AHS1_WT	Earendil_b::1	col9910X::OP50::20::heat_stress	b::1	1	b	5.25469	3.48438	1.98438	1.9875	col9910X		OP50			20	32		heat_stress				0	1		0	0.059514
																						Earendil	20210719_AHS1_WT	Earendil_b::1	col9910X::OP50::20::heat_stress	b::1	1	b	5.25469	3.48438	1.98438	1.9875	col9910X		OP50			20	32		heat_stress				0	1		0	-0.002986
																						Earendil	20210719_AHS1_WT	Earendil_b::1	col9910X::OP50::20::heat_stress	b::1	1	b	5.25469	3.48438	1.98438	1.9875	col9910X		OP50			20	32		heat_stress				0	1		0	0.017847
																						Earendil	20210719_AHS1_WT	Earendil_b::1	col9910X::OP50::20::heat_stress	b::1	1	b	5.25469	3.48438	1.98438	1.9875	col9910X		OP50			20	32		heat_stress				0	1		0	-0.002986
																						Earendil	20210719_AHS1_WT	Earendil_b::1	col9910X::OP50::20::heat_stress	b::1	1	b	5.25469	3.48438	1.98438	1.9875	col9910X		OP50			20	32		heat_stress				0	1		0	-0.002986
																						Earendil	20210719_AHS1_WT	Earendil_b::1	col9910X::OP50::20::heat_stress	b::1	1	b	5.25469	3.48438	1.98438	1.9875	col9910X		OP50			20	32		heat_stress				0	1		0	-0.002986
																						Earendil	20210719_AHS1_WT	Earendil_b::1	col9910X::OP50::20::heat_stress	b::1	1	b	5.25469	3.48438	1.98438	1.9875	col9910X		OP50			20	32		heat_stress				0	1		0	-0.002986
																						Earendil	20210719_AHS1_WT	Earendil_b::1	col9910X::OP50::20::heat_stress	b::1	1	b	5.25469	3.48438	1.98438	1.9875	col9910X		OP50			20	32		heat_stress				0	1		0	-0.002986
																						Earendil	20210719_AHS1_WT	Earendil_b::1	col9910X::OP50::20::heat_stress	b::1	1	b	5.25469	3.48438	1.98438	1.9875	col9910X		OP50			20	32		heat_stress				0	1		0	-0.002986
																						Earendil	20210719_AHS1_WT	Earendil_b::1	col9910X::OP50::20::heat_stress	b::1	1	b	5.25469	3.48438	1.98438	1.9875	col9910X		OP50			20	32		heat_stress				0	1		0	0.101181
																						Earendil	20210719_AHS1_WT	Earendil_b::1	col9910X::OP50::20::heat_stress	b::1	1	b	5.25469	3.48438	1.98438	1.9875	col9910X		OP50			20	32		heat_stress				0	1		0	-0.002986
																						Earendil	20210719_AHS1_WT	Earendil_b::1	col9910X::OP50::20::heat_stress	b::1	1	b	5.25469	3.48438	1.98438	1.9875	col9910X		OP50			20	32		heat_stress				0	1		0	-0.002986
																						Earendil	20210719_AHS1_WT	Earendil_b::1	col9910X::OP50::20::heat_stress	b::1	1	b	5.25469	3.48438	1.98438	1.9875	col9910X		OP50			20	32		heat_stress				0	1		0	-0.002986
																						Earendil	20210719_AHS1_WT	Earendil_b::1	col9910X::OP50::20::heat_stress	b::1	1	b	5.25469	3.48438	1.98438	1.9875	col9910X		OP50			20	32		heat_stress				0	1		0	0.059514
																						Earendil	20210719_AHS1_WT	Earendil_b::1	col9910X::OP50::20::heat_stress	b::1	1	b	5.25469	3.48438	1.98438	1.9875	col9910X		OP50			20	32		heat_stress				0	1		0	0.017847
																						Earendil	20210719_AHS1_WT	Earendil_b::1	col9910X::OP50::20::heat_stress	b::1	1	b	5.25469	3.48438	1.98438	1.9875	col9910X		OP50			20	32		heat_stress				0	1		0	-0.002986
																						Earendil	20210719_AHS1_WT	Earendil_b::1	col9910X::OP50::20::heat_stress	b::1	1	b	5.25469	3.48438	1.98438	1.9875	col9910X		OP50			20	32		heat_stress				0	1		0	-0.002986
																						Earendil	20210719_AHS1_WT	Earendil_b::1	col9910X::OP50::20::heat_stress	b::1	1	b	5.25469	3.48438	1.98438	1.9875	col9910X		OP50			20	32		heat_stress				0	0		0	0.017847
																						Earendil	20210719_AHS1_WT	Earendil_b::1	col9910X::OP50::20::heat_stress	b::1	1	b	5.25469	3.48438	1.98438	1.9875	col9910X		OP50			20	32		heat_stress				0	1		0	-0.002986
																						Earendil	20210719_AHS1_WT	Earendil_b::1	col9910X::OP50::20::heat_stress	b::1	1	b	5.25469	3.48438	1.98438	1.9875	col9910X		OP50			20	32		heat_stress				0	0		0	0.017847
																						Earendil	20210719_AHS1_WT	Earendil_b::1	col9910X::OP50::20::heat_stress	b::1	1	b	5.25469	3.48438	1.98438	1.9875	col9910X		OP50			20	32		heat_stress				0	1		0	-0.002986
																						Earendil	20210719_AHS1_WT	Earendil_b::1	col9910X::OP50::20::heat_stress	b::1	1	b	5.25469	3.48438	1.98438	1.9875	col9910X		OP50			20	32		heat_stress				0	1		0	-0.002986
																						Earendil	20210719_AHS1_WT	Earendil_b::1	col9910X::OP50::20::heat_stress	b::1	1	b	5.25469	3.48438	1.98438	1.9875	col9910X		OP50			20	32		heat_stress				0	1		0	-0.002986
																						Earendil	20210719_AHS1_WT	Earendil_b::1	col9910X::OP50::20::heat_stress	b::1	1	b	5.25469	3.48438	1.98438	1.9875	col9910X		OP50			20	32		heat_stress				0	1		0	-0.002986
																						Earendil	20210719_AHS1_WT	Earendil_b::1	col9910X::OP50::20::heat_stress	b::1	1	b	5.25469	3.48438	1.98438	1.9875	col9910X		OP50			20	32		heat_stress				0	1		0	0.017847
																						Earendil	20210719_AHS1_WT	Earendil_b::1	col9910X::OP50::20::heat_stress	b::1	1	b	5.25469	3.48438	1.98438	1.9875	col9910X		OP50			20	32		heat_stress				0	1		0	-0.002986
																						Earendil	20210719_AHS1_WT	Earendil_b::1	col9910X::OP50::20::heat_stress	b::1	1	b	5.25469	3.48438	1.98438	1.9875	col9910X		OP50			20	32		heat_stress				0	1		0	0.017847
																						Earendil	20210719_AHS1_WT	Earendil_b::1	col9910X::OP50::20::heat_stress	b::1	1	b	5.25469	3.48438	1.98438	1.9875	col9910X		OP50			20	32		heat_stress				0	1		0	-0.002986
																						Earendil	20210719_AHS1_WT	Earendil_b::1	col9910X::OP50::20::heat_stress	b::1	1	b	5.25469	3.48438	1.98438	1.9875	col9910X		OP50			20	32		heat_stress				0	1		0	-0.002986
																						Earendil	20210719_AHS1_WT	Earendil_b::1	col9910X::OP50::20::heat_stress	b::1	1	b	5.25469	3.48438	1.98438	1.9875	col9910X		OP50			20	32		heat_stress				0	1		0	0.017847
																						Earendil	20210719_AHS1_WT	Earendil_b::1	col9910X::OP50::20::heat_stress	b::1	1	b	5.25469	3.48438	1.98438	1.9875	col9910X		OP50			20	32		heat_stress				0	1		0	-0.002986
																						Earendil	20210719_AHS1_WT	Earendil_b::1	col9910X::OP50::20::heat_stress	b::1	1	b	5.25469	3.48438	1.98438	1.9875	col9910X		OP50			20	32		heat_stress				0	1		0	-0.002986
																						Earendil	20210719_AHS1_WT	Earendil_b::1	col9910X::OP50::20::heat_stress	b::1	1	b	5.25469	3.48438	1.98438	1.9875	col9910X		OP50			20	32		heat_stress				0	1		0	-0.002986
																						Earendil	20210719_AHS1_WT	Earendil_b::1	col9910X::OP50::20::heat_stress	b::1	1	b	5.25469	3.48438	1.98438	1.9875	col9910X		OP50			20	32		heat_stress				0	1		0	0.059514
																						Earendil	20210719_AHS1_WT	Earendil_b::1	col9910X::OP50::20::heat_stress	b::1	1	b	5.25469	3.48438	1.98438	1.9875	col9910X		OP50			20	32		heat_stress				0	1		0	0.101181
																						Earendil	20210719_AHS1_WT	Earendil_b::1	col9910X::OP50::20::heat_stress	b::1	1	b	5.25469	3.48438	1.98438	1.9875	col9910X		OP50			20	32		heat_stress				0	1		0	-0.002986
																						Earendil	20210719_AHS1_WT	Earendil_b::1	col9910X::OP50::20::heat_stress	b::1	1	b	5.25469	3.48438	1.98438	1.9875	col9910X		OP50			20	32		heat_stress				0	1		0	-0.002986
																						Earendil	20210719_AHS1_WT	Earendil_b::1	col9910X::OP50::20::heat_stress	b::1	1	b	5.25469	3.48438	1.98438	1.9875	col9910X		OP50			20	32		heat_stress				0	1		0	0.017847
																						Earendil	20210719_AHS1_WT	Earendil_b::1	col9910X::OP50::20::heat_stress	b::1	1	b	5.25469	3.48438	1.98438	1.9875	col9910X		OP50			20	32		heat_stress				0	1		0	-0.002986
																						Earendil	20210719_AHS1_WT	Earendil_b::1	col9910X::OP50::20::heat_stress	b::1	1	b	5.25469	3.48438	1.98438	1.9875	col9910X		OP50			20	32		heat_stress				0	1		0	0.226181
																						Earendil	20210719_AHS1_WT	Earendil_b::1	col9910X::OP50::20::heat_stress	b::1	1	b	5.25469	3.48438	1.98438	1.9875	col9910X		OP50			20	32		heat_stress				0	1		0	0.059514
																						Earendil	20210719_AHS1_WT	Earendil_b::1	col9910X::OP50::20::heat_stress	b::1	1	b	5.25469	3.48438	1.98438	1.9875	col9910X		OP50			20	32		heat_stress				0	1		0	-0.002986
																						Earendil	20210719_AHS1_WT	Earendil_b::1	col9910X::OP50::20::heat_stress	b::1	1	b	5.25469	3.48438	1.98438	1.9875	col9910X		OP50			20	32		heat_stress				0	1		0	0.059514
																						Earendil	20210719_AHS1_WT	Earendil_b::1	col9910X::OP50::20::heat_stress	b::1	1	b	5.25469	3.48438	1.98438	1.9875	col9910X		OP50			20	32		heat_stress				0	1		0	0.059514
																						Earendil	20210719_AHS1_WT	Earendil_b::1	col9910X::OP50::20::heat_stress	b::1	1	b	5.25469	3.48438	1.98438	1.9875	col9910X		OP50			20	32		heat_stress				0	1		0	-0.002986
																						Earendil	20210719_AHS1_WT	Earendil_b::1	col9910X::OP50::20::heat_stress	b::1	1	b	5.25469	3.48438	1.98438	1.9875	col9910X		OP50			20	32		heat_stress				0	1		0	-0.002986
																						Earendil	20210719_AHS1_WT	Earendil_b::1	col9910X::OP50::20::heat_stress	b::1	1	b	5.25469	3.48438	1.98438	1.9875	col9910X		OP50			20	32		heat_stress				0	1		0	1.26785
																						Earendil	20210719_AHS1_WT	Earendil_b::1	col9910X::OP50::20::heat_stress	b::1	1	b	5.25469	3.48438	1.98438	1.9875	col9910X		OP50			20	32		heat_stress				0	1		0	-0.002986
																						Earendil	20210719_AHS1_WT	Earendil_b::1	col9910X::OP50::20::heat_stress	b::1	1	b	5.25469	3.48438	1.98438	1.9875	col9910X		OP50			20	32		heat_stress				0	1		0	-0.002986
																						Earendil	20210719_AHS1_WT	Earendil_b::1	col9910X::OP50::20::heat_stress	b::1	1	b	5.25469	3.48438	1.98438	1.9875	col9910X		OP50			20	32		heat_stress				0	1		0	-0.002986
																						Earendil	20210719_AHS1_WT	Earendil_b::1	col9910X::OP50::20::heat_stress	b::1	1	b	5.25469	3.48438	1.98438	1.9875	col9910X		OP50			20	32		heat_stress				0	0		0	0.517847
																						Earendil	20210719_AHS1_WT	Earendil_b::1	col9910X::OP50::20::heat_stress	b::1	1	b	5.25469	3.48438	1.98438	1.9875	col9910X		OP50			20	32		heat_stress				0	1		0	0.101181
																						Earendil	20210719_AHS1_WT	Earendil_b::1	col9910X::OP50::20::heat_stress	b::1	1	b	5.25469	3.48438	1.98438	1.9875	col9910X		OP50			20	32		heat_stress				0	1		0	0.351181
																						Earendil	20210719_AHS1_WT	Earendil_b::1	col9910X::OP50::20::heat_stress	b::1	1	b	5.25469	3.48438	1.98438	1.9875	col9910X		OP50			20	32		heat_stress				0	1		0	0.184514
																						Earendil	20210719_AHS1_WT	Earendil_b::1	col9910X::OP50::20::heat_stress	b::1	1	b	5.25469	3.48438	1.98438	1.9875	col9910X		OP50			20	32		heat_stress				0	1		0	1.64285
																						Earendil	20210719_AHS1_WT	Earendil_b::1	col9910X::OP50::20::heat_stress	b::1	1	b	5.25469	3.48438	1.98438	1.9875	col9910X		OP50			20	32		heat_stress				0	1		0	0.059514
																						Earendil	20210719_AHS1_WT	Earendil_b::1	col9910X::OP50::20::heat_stress	b::1	1	b	5.25469	3.48438	1.98438	1.9875	col9910X		OP50			20	32		heat_stress				0	1		0	-0.002986
																						Earendil	20210719_AHS1_WT	Earendil_b::1	col9910X::OP50::20::heat_stress	b::1	1	b	5.25469	3.48438	1.98438	1.9875	col9910X		OP50			20	32		heat_stress				0	1		0	0.267847
																						Earendil	20210719_AHS1_WT	Earendil_b::1	col9910X::OP50::20::heat_stress	b::1	1	b	5.25469	3.48438	1.98438	1.9875	col9910X		OP50			20	32		heat_stress				0	0		0	0.559514
																						Earendil	20210719_AHS1_WT	Earendil_b::1	col9910X::OP50::20::heat_stress	b::1	1	b	5.25469	3.48438	1.98438	1.9875	col9910X		OP50			20	32		heat_stress				0	1		0	-0.002986
																						Earendil	20210719_AHS1_WT	Earendil_b::1	col9910X::OP50::20::heat_stress	b::1	1	b	5.25469	3.48438	1.98438	1.9875	col9910X		OP50			20	32		heat_stress				0	1		0	-0.002986
																						Earendil	20210719_AHS1_WT	Earendil_b::1	col9910X::OP50::20::heat_stress	b::1	1	b	5.25469	3.48438	1.98438	1.9875	col9910X		OP50			20	32		heat_stress				0	0		0	0.184514
																						Earendil	20210719_AHS1_WT	Earendil_b::1	col9910X::OP50::20::heat_stress	b::1	1	b	5.25469	3.48438	1.98438	1.9875	col9910X		OP50			20	32		heat_stress				0	0		0	0.142847
																						Earendil	20210719_AHS1_WT	Earendil_b::1	col9910X::OP50::20::heat_stress	b::1	1	b	5.25469	3.48438	1.98438	1.9875	col9910X		OP50			20	32		heat_stress				0	0		0	0.226181
																						Earendil	20210719_AHS1_WT	Earendil_b::1	col9910X::OP50::20::heat_stress	b::1	1	b	5.25469	3.48438	1.98438	1.9875	col9910X		OP50			20	32		heat_stress				0	0		0	0.184514
																						Earendil	20210719_AHS1_WT	Earendil_b::1	col9910X::OP50::20::heat_stress	b::1	1	b	5.25469	3.48438	1.98438	1.9875	col9910X		OP50			20	32		heat_stress				0	0		0	0.184514
																						Earendil	20210719_AHS1_WT	Earendil_b::1	col9910X::OP50::20::heat_stress	b::1	1	b	5.25469	3.48438	1.98438	1.9875	col9910X		OP50			20	32		heat_stress				0	0		0	0.101181
																						Earendil	20210719_AHS1_WT	Earendil_b::1	col9910X::OP50::20::heat_stress	b::1	1	b	5.25469	3.48438	1.98438	1.9875	col9910X		OP50			20	32		heat_stress				0	0		0	-0.002986
																						Earendil	20210719_AHS1_WT	Earendil_b::1	col9910X::OP50::20::heat_stress	b::1	1	b	5.25469	3.48438	1.98438	1.9875	col9910X		OP50			20	32		heat_stress				0	1		0	-0.002986
																						Earendil	20210719_AHS1_WT	Earendil_b::1	col9910X::OP50::20::heat_stress	b::1	1	b	5.25469	3.48438	1.98438	1.9875	col9910X		OP50			20	32		heat_stress				0	1		0	-0.002986
																						Earendil	20210719_AHS1_WT	Earendil_b::1	col9910X::OP50::20::heat_stress	b::1	1	b	5.25469	3.48438	1.98438	1.9875	col9910X		OP50			20	32		heat_stress				0	1		0	-0.002986
																						Earendil	20210719_AHS1_WT	Earendil_a::1	WT::OP50::20::heat_stress	a::1	1	a	3.22344	3.43594	1.98438	1.98438	WT		OP50			20	32		heat_stress				0	1		0	-0.023819
																						Earendil	20210719_AHS1_WT	Earendil_a::1	WT::OP50::20::heat_stress	a::1	1	a	3.22344	3.43594	1.98438	1.98438	WT		OP50			20	32		heat_stress				0	1		0	0.122014
																						Earendil	20210719_AHS1_WT	Earendil_a::1	WT::OP50::20::heat_stress	a::1	1	a	3.22344	3.43594	1.98438	1.98438	WT		OP50			20	32		heat_stress				0	1		0	1.95535
																						Earendil	20210719_AHS1_WT	Earendil_a::1	WT::OP50::20::heat_stress	a::1	1	a	3.22344	3.43594	1.98438	1.98438	WT		OP50			20	32		heat_stress				0	1		0	0.788681
																						Earendil	20210719_AHS1_WT	Earendil_a::1	WT::OP50::20::heat_stress	a::1	1	a	3.22344	3.43594	1.98438	1.98438	WT		OP50			20	32		heat_stress				0	1		0	-0.023819
																						Earendil	20210719_AHS1_WT	Earendil_a::1	WT::OP50::20::heat_stress	a::1	1	a	3.22344	3.43594	1.98438	1.98438	WT		OP50			20	32		heat_stress				0	1		0	0.038681
																						Earendil	20210719_AHS1_WT	Earendil_a::1	WT::OP50::20::heat_stress	a::1	1	a	3.22344	3.43594	1.98438	1.98438	WT		OP50			20	32		heat_stress				0	0		0	0.038681
																						Earendil	20210719_AHS1_WT	Earendil_a::1	WT::OP50::20::heat_stress	a::1	1	a	3.22344	3.43594	1.98438	1.98438	WT		OP50			20	32		heat_stress				0	1		0	0.038681
																						Earendil	20210719_AHS1_WT	Earendil_a::1	WT::OP50::20::heat_stress	a::1	1	a	3.22344	3.43594	1.98438	1.98438	WT		OP50			20	32		heat_stress				0	1		0	0.205347
																						Earendil	20210719_AHS1_WT	Earendil_a::1	WT::OP50::20::heat_stress	a::1	1	a	3.22344	3.43594	1.98438	1.98438	WT		OP50			20	32		heat_stress				0	1		0	-0.023819
																						Earendil	20210719_AHS1_WT	Earendil_a::1	WT::OP50::20::heat_stress	a::1	1	a	3.22344	3.43594	1.98438	1.98438	WT		OP50			20	32		heat_stress				0	1		0	0.122014
																						Earendil	20210719_AHS1_WT	Earendil_a::1	WT::OP50::20::heat_stress	a::1	1	a	3.22344	3.43594	1.98438	1.98438	WT		OP50			20	32		heat_stress				0	1		0	0.080347
																						Earendil	20210719_AHS1_WT	Earendil_a::1	WT::OP50::20::heat_stress	a::1	1	a	3.22344	3.43594	1.98438	1.98438	WT		OP50			20	32		heat_stress				0	1		0	-0.023819
																						Earendil	20210719_AHS1_WT	Earendil_a::1	WT::OP50::20::heat_stress	a::1	1	a	3.22344	3.43594	1.98438	1.98438	WT		OP50			20	32		heat_stress				0	1		0	0.038681
																						Earendil	20210719_AHS1_WT	Earendil_a::1	WT::OP50::20::heat_stress	a::1	1	a	3.22344	3.43594	1.98438	1.98438	WT		OP50			20	32		heat_stress				0	1		0	-0.023819
																						Earendil	20210719_AHS1_WT	Earendil_a::1	WT::OP50::20::heat_stress	a::1	1	a	3.22344	3.43594	1.98438	1.98438	WT		OP50			20	32		heat_stress				0	1		0	0.080347
																						Earendil	20210719_AHS1_WT	Earendil_a::1	WT::OP50::20::heat_stress	a::1	1	a	3.22344	3.43594	1.98438	1.98438	WT		OP50			20	32		heat_stress				0	1		0	-0.002986
																						Earendil	20210719_AHS1_WT	Earendil_a::1	WT::OP50::20::heat_stress	a::1	1	a	3.22344	3.43594	1.98438	1.98438	WT		OP50			20	32		heat_stress				0	1		0	-0.002986
																						Earendil	20210719_AHS1_WT	Earendil_a::1	WT::OP50::20::heat_stress	a::1	1	a	3.22344	3.43594	1.98438	1.98438	WT		OP50			20	32		heat_stress				0	1	Extra worm from multiple-worm disambiguation	0	0.038681
																						Earendil	20210719_AHS1_WT	Earendil_a::1	WT::OP50::20::heat_stress	a::1	1	a	3.22344	3.43594	1.98438	1.98438	WT		OP50			20	32		heat_stress				0	0		0	-0.002986
																						Earendil	20210719_AHS1_WT	Earendil_a::1	WT::OP50::20::heat_stress	a::1	1	a	3.22344	3.43594	1.98438	1.98438	WT		OP50			20	32		heat_stress				0	1		0	-0.023819
																						Earendil	20210719_AHS1_WT	Earendil_a::1	WT::OP50::20::heat_stress	a::1	1	a	3.22344	3.43594	1.98438	1.98438	WT		OP50			20	32		heat_stress				0	1		0	-0.002986
																						Earendil	20210719_AHS1_WT	Earendil_a::1	WT::OP50::20::heat_stress	a::1	1	a	3.22344	3.43594	1.98438	1.98438	WT		OP50			20	32		heat_stress				0	1		0	-0.002986
																						Earendil	20210719_AHS1_WT	Earendil_a::1	WT::OP50::20::heat_stress	a::1	1	a	3.22344	3.43594	1.98438	1.98438	WT		OP50			20	32		heat_stress				0	0		0	0.080347
																						Earendil	20210719_AHS1_WT	Earendil_a::1	WT::OP50::20::heat_stress	a::1	1	a	3.22344	3.43594	1.98438	1.98438	WT		OP50			20	32		heat_stress				0	1		0	0.455347
																						Earendil	20210719_AHS1_WT	Earendil_a::1	WT::OP50::20::heat_stress	a::1	1	a	3.22344	3.43594	1.98438	1.98438	WT		OP50			20	32		heat_stress				0	0		0	0.330347
																						Earendil	20210719_AHS1_WT	Earendil_a::1	WT::OP50::20::heat_stress	a::1	1	a	3.22344	3.43594	1.98438	1.98438	WT		OP50			20	32		heat_stress				0	1		0	-0.023819
																						Earendil	20210719_AHS1_WT	Earendil_a::1	WT::OP50::20::heat_stress	a::1	1	a	3.22344	3.43594	1.98438	1.98438	WT		OP50			20	32		heat_stress				0	0		0	0.080347
																						Earendil	20210719_AHS1_WT	Earendil_a::1	WT::OP50::20::heat_stress	a::1	1	a	3.22344	3.43594	1.98438	1.98438	WT		OP50			20	32		heat_stress				0	1		0	0.038681
																						Earendil	20210719_AHS1_WT	Earendil_a::1	WT::OP50::20::heat_stress	a::1	1	a	3.22344	3.43594	1.98438	1.98438	WT		OP50			20	32		heat_stress				0	1		0	-0.002986
																						Earendil	20210719_AHS1_WT	Earendil_a::1	WT::OP50::20::heat_stress	a::1	1	a	3.22344	3.43594	1.98438	1.98438	WT		OP50			20	32		heat_stress				0	1		0	0.455347
																						Earendil	20210719_AHS1_WT	Earendil_a::1	WT::OP50::20::heat_stress	a::1	1	a	3.22344	3.43594	1.98438	1.98438	WT		OP50			20	32		heat_stress				0	1		0	-0.002986
																						Earendil	20210719_AHS1_WT	Earendil_a::1	WT::OP50::20::heat_stress	a::1	1	a	3.22344	3.43594	1.98438	1.98438	WT		OP50			20	32		heat_stress				0	1		0	-0.002986
																						Earendil	20210719_AHS1_WT	Earendil_a::1	WT::OP50::20::heat_stress	a::1	1	a	3.22344	3.43594	1.98438	1.98438	WT		OP50			20	32		heat_stress				0	1		0	-0.023819
																						Earendil	20210719_AHS1_WT	Earendil_a::1	WT::OP50::20::heat_stress	a::1	1	a	3.22344	3.43594	1.98438	1.98438	WT		OP50			20	32		heat_stress				0	1		0	-0.002986
																						Earendil	20210719_AHS1_WT	Earendil_a::1	WT::OP50::20::heat_stress	a::1	1	a	3.22344	3.43594	1.98438	1.98438	WT		OP50			20	32		heat_stress				0	1		0	0.747014
																						Earendil	20210719_AHS1_WT	Earendil_a::1	WT::OP50::20::heat_stress	a::1	1	a	3.22344	3.43594	1.98438	1.98438	WT		OP50			20	32		heat_stress				0	1		0	-0.023819
																						Earendil	20210719_AHS1_WT	Earendil_a::1	WT::OP50::20::heat_stress	a::1	1	a	3.22344	3.43594	1.98438	1.98438	WT		OP50			20	32		heat_stress				0	1		0	0.080347
																						Earendil	20210719_AHS1_WT	Earendil_a::1	WT::OP50::20::heat_stress	a::1	1	a	3.22344	3.43594	1.98438	1.98438	WT		OP50			20	32		heat_stress				0	1		0	-0.023819
																						Earendil	20210719_AHS1_WT	Earendil_a::1	WT::OP50::20::heat_stress	a::1	1	a	3.22344	3.43594	1.98438	1.98438	WT		OP50			20	32		heat_stress				0	1		0	0.288681
																						Earendil	20210719_AHS1_WT	Earendil_a::1	WT::OP50::20::heat_stress	a::1	1	a	3.22344	3.43594	1.98438	1.98438	WT		OP50			20	32		heat_stress				0	0		0	1.45535
																						Earendil	20210719_AHS1_WT	Earendil_a::1	WT::OP50::20::heat_stress	a::1	1	a	3.22344	3.43594	1.98438	1.98438	WT		OP50			20	32		heat_stress				0	1		0	-0.023819
																						Earendil	20210719_AHS1_WT	Earendil_a::1	WT::OP50::20::heat_stress	a::1	1	a	3.22344	3.43594	1.98438	1.98438	WT		OP50			20	32		heat_stress				0	1		0	0.747014
																						Earendil	20210719_AHS1_WT	Earendil_a::1	WT::OP50::20::heat_stress	a::1	1	a	3.22344	3.43594	1.98438	1.98438	WT		OP50			20	32		heat_stress				0	1		0	-0.023819
																						Earendil	20210719_AHS1_WT	Earendil_a::1	WT::OP50::20::heat_stress	a::1	1	a	3.22344	3.43594	1.98438	1.98438	WT		OP50			20	32		heat_stress				0	1		0	0.580347
																						Earendil	20210719_AHS1_WT	Earendil_a::1	WT::OP50::20::heat_stress	a::1	1	a	3.22344	3.43594	1.98438	1.98438	WT		OP50			20	32		heat_stress				0	1		0	0.080347
																						Earendil	20210719_AHS1_WT	Earendil_a::1	WT::OP50::20::heat_stress	a::1	1	a	3.22344	3.43594	1.98438	1.98438	WT		OP50			20	32		heat_stress				0	1		0	-0.023819
																						Earendil	20210719_AHS1_WT	Earendil_a::1	WT::OP50::20::heat_stress	a::1	1	a	3.22344	3.43594	1.98438	1.98438	WT		OP50			20	32		heat_stress				0	1	Extra worm from multiple-worm disambiguation	0	1.03868
																						Earendil	20210719_AHS1_WT	Earendil_a::1	WT::OP50::20::heat_stress	a::1	1	a	3.22344	3.43594	1.98438	1.98438	WT		OP50			20	32		heat_stress				0	0		0	0.247014
																						Earendil	20210719_AHS1_WT	Earendil_a::1	WT::OP50::20::heat_stress	a::1	1	a	3.22344	3.43594	1.98438	1.98438	WT		OP50			20	32		heat_stress				0	0		0	0.038681
																						Earendil	20210719_AHS1_WT	Earendil_a::1	WT::OP50::20::heat_stress	a::1	1	a	3.22344	3.43594	1.98438	1.98438	WT		OP50			20	32		heat_stress				0	1		0	-0.002986
																						Earendil	20210719_AHS1_WT	Earendil_a::1	WT::OP50::20::heat_stress	a::1	1	a	3.22344	3.43594	1.98438	1.98438	WT		OP50			20	32		heat_stress				0	1		0	0.830347
																						Earendil	20210719_AHS1_WT	Earendil_a::1	WT::OP50::20::heat_stress	a::1	1	a	3.22344	3.43594	1.98438	1.98438	WT		OP50			20	32		heat_stress				0	1		0	0.288681
																						Earendil	20210719_AHS1_WT	Earendil_a::1	WT::OP50::20::heat_stress	a::1	1	a	3.22344	3.43594	1.98438	1.98438	WT		OP50			20	32		heat_stress				0	1		0	0.080347
																						Earendil	20210719_AHS1_WT	Earendil_a::1	WT::OP50::20::heat_stress	a::1	1	a	3.22344	3.43594	1.98438	1.98438	WT		OP50			20	32		heat_stress				0	1		0	0.122014
																						Earendil	20210719_AHS1_WT	Earendil_a::1	WT::OP50::20::heat_stress	a::1	1	a	3.22344	3.43594	1.98438	1.98438	WT		OP50			20	32		heat_stress				0	0		0	0.830347
																						Earendil	20210719_AHS1_WT	Earendil_a::1	WT::OP50::20::heat_stress	a::1	1	a	3.22344	3.43594	1.98438	1.98438	WT		OP50			20	32		heat_stress				0	1		0	-0.002986
																						Earendil	20210719_AHS1_WT	Earendil_a::1	WT::OP50::20::heat_stress	a::1	1	a	3.22344	3.43594	1.98438	1.98438	WT		OP50			20	32		heat_stress				0	0		0	0.913681
																						Earendil	20210719_AHS1_WT	Earendil_a::1	WT::OP50::20::heat_stress	a::1	1	a	3.22344	3.43594	1.98438	1.98438	WT		OP50			20	32		heat_stress				0	0		0	0.872014
																						Earendil	20210719_AHS1_WT	Earendil_a::1	WT::OP50::20::heat_stress	a::1	1	a	3.22344	3.43594	1.98438	1.98438	WT		OP50			20	32		heat_stress				0	1		0	-0.023819
																						Earendil	20210719_AHS1_WT	Earendil_a::1	WT::OP50::20::heat_stress	a::1	1	a	3.22344	3.43594	1.98438	1.98438	WT		OP50			20	32		heat_stress				0	0		0	0.830347
																						Earendil	20210719_AHS1_WT	Earendil_a::1	WT::OP50::20::heat_stress	a::1	1	a	3.22344	3.43594	1.98438	1.98438	WT		OP50			20	32		heat_stress				0	0		0	0.538681
																						Earendil	20210719_AHS1_WT	Earendil_a::1	WT::OP50::20::heat_stress	a::1	1	a	3.22344	3.43594	1.98438	1.98438	WT		OP50			20	32		heat_stress				0	1		0	0.705347
																						Earendil	20210719_AHS1_WT	Earendil_a::1	WT::OP50::20::heat_stress	a::1	1	a	3.22344	3.43594	1.98438	1.98438	WT		OP50			20	32		heat_stress				0	1		0	-0.002986
																						Earendil	20210719_AHS1_WT	Earendil_a::1	WT::OP50::20::heat_stress	a::1	1	a	3.22344	3.43594	1.98438	1.98438	WT		OP50			20	32		heat_stress				0	0		0	0.788681
																						Earendil	20210719_AHS1_WT	Earendil_a::1	WT::OP50::20::heat_stress	a::1	1	a	3.22344	3.43594	1.98438	1.98438	WT		OP50			20	32		heat_stress				0	1		0	-0.023819
																						Earendil	20210719_AHS1_WT	Earendil_a::1	WT::OP50::20::heat_stress	a::1	1	a	3.22344	3.43594	1.98438	1.98438	WT		OP50			20	32		heat_stress				0	0		0	0.163681
																						Earendil	20210719_AHS1_WT	Earendil_a::1	WT::OP50::20::heat_stress	a::1	1	a	3.22344	3.43594	1.98438	1.98438	WT		OP50			20	32		heat_stress				0	1		0	0.330347
																						Earendil	20210719_AHS1_WT	Earendil_a::1	WT::OP50::20::heat_stress	a::1	1	a	3.22344	3.43594	1.98438	1.98438	WT		OP50			20	32		heat_stress				0	1		0	0.663681
																						Earendil	20210719_AHS1_WT	Earendil_a::1	WT::OP50::20::heat_stress	a::1	1	a	3.22344	3.43594	1.98438	1.98438	WT		OP50			20	32		heat_stress				0	0		0	0.747014
																						Earendil	20210719_AHS1_WT	Earendil_a::1	WT::OP50::20::heat_stress	a::1	1	a	3.22344	3.43594	1.98438	1.98438	WT		OP50			20	32		heat_stress				0	1		0	-0.023819
																						Earendil	20210719_AHS1_WT	Earendil_a::1	WT::OP50::20::heat_stress	a::1	1	a	3.22344	3.43594	1.98438	1.98438	WT		OP50			20	32		heat_stress				0	1		0	0.080347
																						Earendil	20210719_AHS1_WT	Earendil_a::1	WT::OP50::20::heat_stress	a::1	1	a	3.22344	3.43594	1.98438	1.98438	WT		OP50			20	32		heat_stress				0	0		0	0.205347
																						Earendil	20210719_AHS1_WT	Earendil_a::1	WT::OP50::20::heat_stress	a::1	1	a	3.22344	3.43594	1.98438	1.98438	WT		OP50			20	32		heat_stress				0	0		0	0.413681
																						Earendil	20210719_AHS1_WT	Earendil_a::1	WT::OP50::20::heat_stress	a::1	1	a	3.22344	3.43594	1.98438	1.98438	WT		OP50			20	32		heat_stress				0	1		0	0.705347
																						Earendil	20210719_AHS1_WT	Earendil_a::1	WT::OP50::20::heat_stress	a::1	1	a	3.22344	3.43594	1.98438	1.98438	WT		OP50			20	32		heat_stress				0	1		0	-0.002986
																						Earendil	20210719_AHS1_WT	Earendil_a::1	WT::OP50::20::heat_stress	a::1	1	a	3.22344	3.43594	1.98438	1.98438	WT		OP50			20	32		heat_stress				0	0		0	0.663681
																						Earendil	20210719_AHS1_WT	Earendil_a::1	WT::OP50::20::heat_stress	a::1	1	a	3.22344	3.43594	1.98438	1.98438	WT		OP50			20	32		heat_stress				0	0		0	0.122014
																						Earendil	20210719_AHS1_WT	Earendil_a::1	WT::OP50::20::heat_stress	a::1	1	a	3.22344	3.43594	1.98438	1.98438	WT		OP50			20	32		heat_stress				0	1		0	-0.002986
																						Earendil	20210719_AHS1_WT	Earendil_a::1	WT::OP50::20::heat_stress	a::1	1	a	3.22344	3.43594	1.98438	1.98438	WT		OP50			20	32		heat_stress				0	0		0	0.622014
																						Earendil	20210719_AHS1_WT	Earendil_a::1	WT::OP50::20::heat_stress	a::1	1	a	3.22344	3.43594	1.98438	1.98438	WT		OP50			20	32		heat_stress				0	0		0	0.580347
																						Earendil	20210719_AHS1_WT	Earendil_a::1	WT::OP50::20::heat_stress	a::1	1	a	3.22344	3.43594	1.98438	1.98438	WT		OP50			20	32		heat_stress				0	0		0	0.622014
																						Earendil	20210719_AHS1_WT	Earendil_a::1	WT::OP50::20::heat_stress	a::1	1	a	3.22344	3.43594	1.98438	1.98438	WT		OP50			20	32		heat_stress				0	1		0	0.122014
																						Earendil	20210719_AHS1_WT	Earendil_a::1	WT::OP50::20::heat_stress	a::1	1	a	3.22344	3.43594	1.98438	1.98438	WT		OP50			20	32		heat_stress				0	0		0	0.580347
																						Earendil	20210719_AHS1_WT	Earendil_a::1	WT::OP50::20::heat_stress	a::1	1	a	3.22344	3.43594	1.98438	1.98438	WT		OP50			20	32		heat_stress				0	0		0	-0.002986
																						Earendil	20210719_AHS1_WT	Earendil_a::1	WT::OP50::20::heat_stress	a::1	1	a	3.22344	3.43594	1.98438	1.98438	WT		OP50			20	32		heat_stress				0	1		0	0.122014
																						Earendil	20210719_AHS1_WT	Earendil_a::1	WT::OP50::20::heat_stress	a::1	1	a	3.22344	3.43594	1.98438	1.98438	WT		OP50			20	32		heat_stress				0	0		0	0.538681
																						Earendil	20210719_AHS1_WT	Earendil_a::1	WT::OP50::20::heat_stress	a::1	1	a	3.22344	3.43594	1.98438	1.98438	WT		OP50			20	32		heat_stress				0	1		0	-0.023819
																						Earendil	20210719_AHS1_WT	Earendil_a::1	WT::OP50::20::heat_stress	a::1	1	a	3.22344	3.43594	1.98438	1.98438	WT		OP50			20	32		heat_stress				0	1		0	-0.002986
																						Earendil	20210719_AHS1_WT	Earendil_a::1	WT::OP50::20::heat_stress	a::1	1	a	3.22344	3.43594	1.98438	1.98438	WT		OP50			20	32		heat_stress				0	0		0	0.538681
																						Earendil	20210719_AHS1_WT	Earendil_a::1	WT::OP50::20::heat_stress	a::1	1	a	3.22344	3.43594	1.98438	1.98438	WT		OP50			20	32		heat_stress				0	0		0	0.038681
																						Earendil	20210719_AHS1_WT	Earendil_a::1	WT::OP50::20::heat_stress	a::1	1	a	3.22344	3.43594	1.98438	1.98438	WT		OP50			20	32		heat_stress				0	0		0	-0.002986
																						Earendil	20210719_AHS1_WT	Earendil_a::1	WT::OP50::20::heat_stress	a::1	1	a	3.22344	3.43594	1.98438	1.98438	WT		OP50			20	32		heat_stress				0	1		0	-0.023819
																						Earendil	20210719_AHS1_WT	Earendil_a::1	WT::OP50::20::heat_stress	a::1	1	a	3.22344	3.43594	1.98438	1.98438	WT		OP50			20	32		heat_stress				0	0		0	0.413681
																						Earendil	20210719_AHS1_WT	Earendil_a::1	WT::OP50::20::heat_stress	a::1	1	a	3.22344	3.43594	1.98438	1.98438	WT		OP50			20	32		heat_stress				0	1		0	0.497014
																						Earendil	20210719_AHS1_WT	Earendil_a::1	WT::OP50::20::heat_stress	a::1	1	a	3.22344	3.43594	1.98438	1.98438	WT		OP50			20	32		heat_stress				0	0		0	0.372014
																						Earendil	20210719_AHS1_WT	Earendil_a::1	WT::OP50::20::heat_stress	a::1	1	a	3.22344	3.43594	1.98438	1.98438	WT		OP50			20	32		heat_stress				0	0		0	0.080347
																						Earendil	20210719_AHS1_WT	Earendil_a::1	WT::OP50::20::heat_stress	a::1	1	a	3.22344	3.43594	1.98438	1.98438	WT		OP50			20	32		heat_stress				0	1		0	0.205347
																						Earendil	20210719_AHS1_WT	Earendil_a::1	WT::OP50::20::heat_stress	a::1	1	a	3.22344	3.43594	1.98438	1.98438	WT		OP50			20	32		heat_stress				0	0		0	0.413681
																						Earendil	20210719_AHS1_WT	Earendil_a::1	WT::OP50::20::heat_stress	a::1	1	a	3.22344	3.43594	1.98438	1.98438	WT		OP50			20	32		heat_stress				0	1		0	0.163681
																						Earendil	20210719_AHS1_WT	Earendil_a::1	WT::OP50::20::heat_stress	a::1	1	a	3.22344	3.43594	1.98438	1.98438	WT		OP50			20	32		heat_stress				0	1		0	0.330347
																						Earendil	20210719_AHS1_WT	Earendil_a::1	WT::OP50::20::heat_stress	a::1	1	a	3.22344	3.43594	1.98438	1.98438	WT		OP50			20	32		heat_stress				0	1		0	0.413681
																						Earendil	20210719_AHS1_WT	Earendil_a::1	WT::OP50::20::heat_stress	a::1	1	a	3.22344	3.43594	1.98438	1.98438	WT		OP50			20	32		heat_stress				0	1		0	0.413681
																						Earendil	20210719_AHS1_WT	Earendil_a::1	WT::OP50::20::heat_stress	a::1	1	a	3.22344	3.43594	1.98438	1.98438	WT		OP50			20	32		heat_stress				0	0		0	0.288681
																						Earendil	20210719_AHS1_WT	Earendil_a::1	WT::OP50::20::heat_stress	a::1	1	a	3.22344	3.43594	1.98438	1.98438	WT		OP50			20	32		heat_stress				0	0		0	0.372014
																						Earendil	20210719_AHS1_WT	Earendil_a::1	WT::OP50::20::heat_stress	a::1	1	a	3.22344	3.43594	1.98438	1.98438	WT		OP50			20	32		heat_stress				0	1		0	-0.002986
																						Earendil	20210719_AHS1_WT	Earendil_a::1	WT::OP50::20::heat_stress	a::1	1	a	3.22344	3.43594	1.98438	1.98438	WT		OP50			20	32		heat_stress				0	1		0	0.038681
																						Earendil	20210719_AHS1_WT	Earendil_a::1	WT::OP50::20::heat_stress	a::1	1	a	3.22344	3.43594	1.98438	1.98438	WT		OP50			20	32		heat_stress				0	0		0	0.122014
																						Earendil	20210719_AHS1_WT	Earendil_a::1	WT::OP50::20::heat_stress	a::1	1	a	3.22344	3.43594	1.98438	1.98438	WT		OP50			20	32		heat_stress				0	1		0	0.330347
																						Earendil	20210719_AHS1_WT	Earendil_a::1	WT::OP50::20::heat_stress	a::1	1	a	3.22344	3.43594	1.98438	1.98438	WT		OP50			20	32		heat_stress				0	1		0	-0.023819
																						Earendil	20210719_AHS1_WT	Earendil_a::1	WT::OP50::20::heat_stress	a::1	1	a	3.22344	3.43594	1.98438	1.98438	WT		OP50			20	32		heat_stress				0	1		0	0.080347
																						Earendil	20210719_AHS1_WT	Earendil_a::1	WT::OP50::20::heat_stress	a::1	1	a	3.22344	3.43594	1.98438	1.98438	WT		OP50			20	32		heat_stress				0	0		0	-0.002986
																						Earendil	20210719_AHS1_WT	Earendil_a::1	WT::OP50::20::heat_stress	a::1	1	a	3.22344	3.43594	1.98438	1.98438	WT		OP50			20	32		heat_stress				0	1		0	0.247014
																						Earendil	20210719_AHS1_WT	Earendil_a::1	WT::OP50::20::heat_stress	a::1	1	a	3.22344	3.43594	1.98438	1.98438	WT		OP50			20	32		heat_stress				0	1		0	0.163681
																						Earendil	20210719_AHS1_WT	Earendil_a::1	WT::OP50::20::heat_stress	a::1	1	a	3.22344	3.43594	1.98438	1.98438	WT		OP50			20	32		heat_stress				0	1		0	-0.002986
																						Earendil	20210719_AHS1_WT	Earendil_a::1	WT::OP50::20::heat_stress	a::1	1	a	3.22344	3.43594	1.98438	1.98438	WT		OP50			20	32		heat_stress				0	1		0	0.247014
																						Earendil	20210719_AHS1_WT	Earendil_a::1	WT::OP50::20::heat_stress	a::1	1	a	3.22344	3.43594	1.98438	1.98438	WT		OP50			20	32		heat_stress				0	0		0	-0.002986
																						Earendil	20210719_AHS1_WT	Earendil_a::1	WT::OP50::20::heat_stress	a::1	1	a	3.22344	3.43594	1.98438	1.98438	WT		OP50			20	32		heat_stress				0	1		0	0.122014
																						Earendil	20210719_AHS1_WT	Earendil_a::1	WT::OP50::20::heat_stress	a::1	1	a	3.22344	3.43594	1.98438	1.98438	WT		OP50			20	32		heat_stress				0	1		0	-0.002986
																						Earendil	20210719_AHS1_WT	Earendil_a::1	WT::OP50::20::heat_stress	a::1	1	a	3.22344	3.43594	1.98438	1.98438	WT		OP50			20	32		heat_stress				0	1		0	-0.002986
																						Earendil	20210719_AHS1_WT	Earendil_a::1	WT::OP50::20::heat_stress	a::1	1	a	3.22344	3.43594	1.98438	1.98438	WT		OP50			20	32		heat_stress				0	1		0	-0.002986
																						Earendil	20210719_AHS1_WT	Earendil_a::1	WT::OP50::20::heat_stress	a::1	1	a	3.22344	3.43594	1.98438	1.98438	WT		OP50			20	32		heat_stress				0	1		0	0.080347
																						Earendil	20210719_AHS1_WT	Earendil_a::1	WT::OP50::20::heat_stress	a::1	1	a	3.22344	3.43594	1.98438	1.98438	WT		OP50			20	32		heat_stress				0	1		0	0.080347
																						Earendil	20210719_AHS1_WT	Earendil_a::1	WT::OP50::20::heat_stress	a::1	1	a	3.22344	3.43594	1.98438	1.98438	WT		OP50			20	32		heat_stress				0	1		0	-0.023819
																						Earendil	20210719_AHS1_WT	Earendil_a::1	WT::OP50::20::heat_stress	a::1	1	a	3.22344	3.43594	1.98438	1.98438	WT		OP50			20	32		heat_stress				0	1		0	-0.023819
																						Earendil	20210719_AHS1_WT	Earendil_a::1	WT::OP50::20::heat_stress	a::1	1	a	3.22344	3.43594	1.98438	1.98438	WT		OP50			20	32		heat_stress				0	1		0	-0.023819
																						Earendil	20210719_AHS1_WT	Earendil_a::1	WT::OP50::20::heat_stress	a::1	1	a	3.22344	3.43594	1.98438	1.98438	WT		OP50			20	32		heat_stress				0	1		0	-0.002986
																						Earendil	20210719_AHS1_WT	Earendil_a::1	WT::OP50::20::heat_stress	a::1	1	a	3.22344	3.43594	1.98438	1.98438	WT		OP50			20	32		heat_stress				0	1		0	-0.023819
																						Earendil	20210719_AHS1_WT	Earendil_a::1	WT::OP50::20::heat_stress	a::1	1	a	3.22344	3.43594	1.98438	1.98438	WT		OP50			20	32		heat_stress				0	0		0	-0.023819
																						Earendil	20210719_AHS1_WT	Earendil_a::1	WT::OP50::20::heat_stress	a::1	1	a	3.22344	3.43594	1.98438	1.98438	WT		OP50			20	32		heat_stress				0	1		0	-0.023819
																						Earendil	20210719_AHS1_WT	Earendil_a::1	WT::OP50::20::heat_stress	a::1	1	a	3.22344	3.43594	1.98438	1.98438	WT		OP50			20	32		heat_stress				0	1		0	0.038681
																						Earendil	20210719_AHS1_WT	Earendil_a::1	WT::OP50::20::heat_stress	a::1	1	a	3.22344	3.43594	1.98438	1.98438	WT		OP50			20	32		heat_stress				0	1		0	-0.023819
																						Earendil	20210719_AHS1_WT	Earendil_a::1	WT::OP50::20::heat_stress	a::1	1	a	3.22344	3.43594	1.98438	1.98438	WT		OP50			20	32		heat_stress				0	1		0	-0.023819
																						Earendil	20210719_AHS1_WT	Earendil_a::1	WT::OP50::20::heat_stress	a::1	1	a	3.22344	3.43594	1.98438	1.98438	WT		OP50			20	32		heat_stress				0	1		0	-0.023819
																						Earendil	20210719_AHS1_WT	Earendil_a::1	WT::OP50::20::heat_stress	a::1	1	a	3.22344	3.43594	1.98438	1.98438	WT		OP50			20	32		heat_stress				0	1		0	-0.023819
																						Earendil	20210719_AHS1_WT	Earendil_a::1	WT::OP50::20::heat_stress	a::1	1	a	3.22344	3.43594	1.98438	1.98438	WT		OP50			20	32		heat_stress				0	1		0	-0.023819
																						Earendil	20210719_AHS1_WT	Earendil_a::1	WT::OP50::20::heat_stress	a::1	1	a	3.22344	3.43594	1.98438	1.98438	WT		OP50			20	32		heat_stress				0	1		0	-0.023819
																						Earendil	20210719_AHS1_WT	Earendil_a::1	WT::OP50::20::heat_stress	a::1	1	a	3.22344	3.43594	1.98438	1.98438	WT		OP50			20	32		heat_stress				0	1		0	-0.002986
																						Earendil	20210719_AHS1_WT	Earendil_a::1	WT::OP50::20::heat_stress	a::1	1	a	3.22344	3.43594	1.98438	1.98438	WT		OP50			20	32		heat_stress				0	1		0	-0.023819
																						Earendil	20210719_AHS1_WT	Earendil_a::1	WT::OP50::20::heat_stress	a::1	1	a	3.22344	3.43594	1.98438	1.98438	WT		OP50			20	32		heat_stress				0	1		0	-0.023819
																						Earendil	20210719_AHS1_WT	Earendil_a::1	WT::OP50::20::heat_stress	a::1	1	a	3.22344	3.43594	1.98438	1.98438	WT		OP50			20	32		heat_stress				0	1		0	-0.023819
																						Earendil	20210719_AHS1_WT	Earendil_a::1	WT::OP50::20::heat_stress	a::1	1	a	3.22344	3.43594	1.98438	1.98438	WT		OP50			20	32		heat_stress				0	0		0	-0.002986
																						Earendil	20210719_AHS1_WT	Earendil_a::1	WT::OP50::20::heat_stress	a::1	1	a	3.22344	3.43594	1.98438	1.98438	WT		OP50			20	32		heat_stress				0	1		0	-0.023819
																						Earendil	20210719_AHS1_WT	Earendil_a::1	WT::OP50::20::heat_stress	a::1	1	a	3.22344	3.43594	1.98438	1.98438	WT		OP50			20	32		heat_stress				0	1		0	-0.023819
																						Earendil	20210719_AHS1_WT	Earendil_a::1	WT::OP50::20::heat_stress	a::1	1	a	3.22344	3.43594	1.98438	1.98438	WT		OP50			20	32		heat_stress				0	1		0	-0.023819
																						Earendil	20210719_AHS1_WT	Earendil_a::1	WT::OP50::20::heat_stress	a::1	1	a	3.22344	3.43594	1.98438	1.98438	WT		OP50			20	32		heat_stress				0	1		0	-0.023819
																						Earendil	20210719_AHS1_WT	Earendil_a::1	WT::OP50::20::heat_stress	a::1	1	a	3.22344	3.43594	1.98438	1.98438	WT		OP50			20	32		heat_stress				0	1		0	-0.023819
																						Earendil	20210719_AHS1_WT	Earendil_a::1	WT::OP50::20::heat_stress	a::1	1	a	3.22344	3.43594	1.98438	1.98438	WT		OP50			20	32		heat_stress				0	1		0	-0.023819
																						Earendil	20210719_AHS1_WT	Earendil_a::1	WT::OP50::20::heat_stress	a::1	1	a	3.22344	3.43594	1.98438	1.98438	WT		OP50			20	32		heat_stress				0	1		0	0.080347
																						Earendil	20210719_AHS1_WT	Earendil_a::1	WT::OP50::20::heat_stress	a::1	1	a	3.22344	3.43594	1.98438	1.98438	WT		OP50			20	32		heat_stress				0	1		0	-0.023819
																						Earendil	20210719_AHS1_WT	Earendil_a::1	WT::OP50::20::heat_stress	a::1	1	a	3.22344	3.43594	1.98438	1.98438	WT		OP50			20	32		heat_stress				0	0		0	-0.023819
																						Earendil	20210719_AHS1_WT	Earendil_a::1	WT::OP50::20::heat_stress	a::1	1	a	3.22344	3.43594	1.98438	1.98438	WT		OP50			20	32		heat_stress				0	1		0	0.038681
																						Earendil	20210719_AHS1_WT	Earendil_a::1	WT::OP50::20::heat_stress	a::1	1	a	3.22344	3.43594	1.98438	1.98438	WT		OP50			20	32		heat_stress				0	1		0	0.080347
																						Earendil	20210719_AHS1_WT	Earendil_a::1	WT::OP50::20::heat_stress	a::1	1	a	3.22344	3.43594	1.98438	1.98438	WT		OP50			20	32		heat_stress				0	1		0	-0.023819
																						Earendil	20210719_AHS1_WT	Earendil_a::1	WT::OP50::20::heat_stress	a::1	1	a	3.22344	3.43594	1.98438	1.98438	WT		OP50			20	32		heat_stress				0	1		0	0.080347
																						Earendil	20210719_AHS1_WT	Earendil_a::1	WT::OP50::20::heat_stress	a::1	1	a	3.22344	3.43594	1.98438	1.98438	WT		OP50			20	32		heat_stress				0	0		0	-0.023819
																						Earendil	20210719_AHS1_WT	Earendil_a::1	WT::OP50::20::heat_stress	a::1	1	a	3.22344	3.43594	1.98438	1.98438	WT		OP50			20	32		heat_stress				0	1		0	-0.023819
																						Earendil	20210719_AHS1_WT	Earendil_a::1	WT::OP50::20::heat_stress	a::1	1	a	3.22344	3.43594	1.98438	1.98438	WT		OP50			20	32		heat_stress				0	1		0	-0.002986
																						Earendil	20210719_AHS1_WT	Earendil_a::1	WT::OP50::20::heat_stress	a::1	1	a	3.22344	3.43594	1.98438	1.98438	WT		OP50			20	32		heat_stress				0	1		0	-0.023819
																						Earendil	20210719_AHS1_WT	Earendil_a::1	WT::OP50::20::heat_stress	a::1	1	a	3.22344	3.43594	1.98438	1.98438	WT		OP50			20	32		heat_stress				0	1		0	-0.023819
																						Earendil	20210719_AHS1_WT	Earendil_a::1	WT::OP50::20::heat_stress	a::1	1	a	3.22344	3.43594	1.98438	1.98438	WT		OP50			20	32		heat_stress				0	1		0	0.038681
																						Earendil	20210719_AHS1_WT	Earendil_a::1	WT::OP50::20::heat_stress	a::1	1	a	3.22344	3.43594	1.98438	1.98438	WT		OP50			20	32		heat_stress				0	1		0	0.038681
																						Earendil	20210719_AHS1_WT	Earendil_a::1	WT::OP50::20::heat_stress	a::1	1	a	3.22344	3.43594	1.98438	1.98438	WT		OP50			20	32		heat_stress				0	1		0	-0.023819
																						Earendil	20210719_AHS1_WT	Earendil_a::1	WT::OP50::20::heat_stress	a::1	1	a	3.22344	3.43594	1.98438	1.98438	WT		OP50			20	32		heat_stress				0	1		0	-0.023819
																						Earendil	20210719_AHS1_WT	Earendil_a::1	WT::OP50::20::heat_stress	a::1	1	a	3.22344	3.43594	1.98438	1.98438	WT		OP50			20	32		heat_stress				0	1		0	-0.023819
																						Earendil	20210719_AHS1_WT	Earendil_a::1	WT::OP50::20::heat_stress	a::1	1	a	3.22344	3.43594	1.98438	1.98438	WT		OP50			20	32		heat_stress				0	1		0	-0.002986
																						Earendil	20210719_AHS1_WT	Earendil_a::1	WT::OP50::20::heat_stress	a::1	1	a	3.22344	3.43594	1.98438	1.98438	WT		OP50			20	32		heat_stress				0	1		0	0.247014
																						Earendil	20210719_AHS1_WT	Earendil_a::1	WT::OP50::20::heat_stress	a::1	1	a	3.22344	3.43594	1.98438	1.98438	WT		OP50			20	32		heat_stress				0	0		0	0.288681
																						Earendil	20210719_AHS1_WT	Earendil_a::1	WT::OP50::20::heat_stress	a::1	1	a	3.22344	3.43594	1.98438	1.98438	WT		OP50			20	32		heat_stress				0	1		0	0.038681
																						Earendil	20210719_AHS1_WT	Earendil_a::1	WT::OP50::20::heat_stress	a::1	1	a	3.22344	3.43594	1.98438	1.98438	WT		OP50			20	32		heat_stress				0	1		0	-0.023819
																						Earendil	20210719_AHS1_WT	Earendil_a::1	WT::OP50::20::heat_stress	a::1	1	a	3.22344	3.43594	1.98438	1.98438	WT		OP50			20	32		heat_stress				0	1		0	-0.023819
																						Earendil	20210719_AHS1_WT	Earendil_a::1	WT::OP50::20::heat_stress	a::1	1	a	3.22344	3.43594	1.98438	1.98438	WT		OP50			20	32		heat_stress				0	1		0	-0.023819
																						Earendil	20210719_AHS1_WT	Earendil_a::1	WT::OP50::20::heat_stress	a::1	1	a	3.22344	3.43594	1.98438	1.98438	WT		OP50			20	32		heat_stress				0	1		0	-0.002986
																						Earendil	20210719_AHS1_WT	Earendil_a::1	WT::OP50::20::heat_stress	a::1	1	a	3.22344	3.43594	1.98438	1.98438	WT		OP50			20	32		heat_stress				0	1		0	-0.023819
																						Earendil	20210719_AHS1_WT	Earendil_a::1	WT::OP50::20::heat_stress	a::1	1	a	3.22344	3.43594	1.98438	1.98438	WT		OP50			20	32		heat_stress				0	0		0	0.080347
																						Earendil	20210719_AHS1_WT	Earendil_a::1	WT::OP50::20::heat_stress	a::1	1	a	3.22344	3.43594	1.98438	1.98438	WT		OP50			20	32		heat_stress				0	1		0	-0.002986
																						Earendil	20210719_AHS1_WT	Earendil_a::1	WT::OP50::20::heat_stress	a::1	1	a	3.22344	3.43594	1.98438	1.98438	WT		OP50			20	32		heat_stress				0	1		0	-0.002986
																						Earendil	20210719_AHS1_WT	Earendil_a::1	WT::OP50::20::heat_stress	a::1	1	a	3.22344	3.43594	1.98438	1.98438	WT		OP50			20	32		heat_stress				0	1		0	-0.002986
																						Earendil	20210719_AHS1_WT	Earendil_a::1	WT::OP50::20::heat_stress	a::1	1	a	3.22344	3.43594	1.98438	1.98438	WT		OP50			20	32		heat_stress				0	1		0	0.413681
																						Earendil	20210719_AHS1_WT	Earendil_a::1	WT::OP50::20::heat_stress	a::1	1	a	3.22344	3.43594	1.98438	1.98438	WT		OP50			20	32		heat_stress				0	1		0	-0.002986
																						Earendil	20210719_AHS1_WT	Earendil_a::1	WT::OP50::20::heat_stress	a::1	1	a	3.22344	3.43594	1.98438	1.98438	WT		OP50			20	32		heat_stress				0	1		0	0.038681
																						Earendil	20210719_AHS1_WT	Earendil_a::1	WT::OP50::20::heat_stress	a::1	1	a	3.22344	3.43594	1.98438	1.98438	WT		OP50			20	32		heat_stress				0	1		0	0.538681
																						Earendil	20210719_AHS1_WT	Earendil_a::1	WT::OP50::20::heat_stress	a::1	1	a	3.22344	3.43594	1.98438	1.98438	WT		OP50			20	32		heat_stress				0	1		0	0.622014
																						Earendil	20210719_AHS1_WT	Earendil_a::1	WT::OP50::20::heat_stress	a::1	1	a	3.22344	3.43594	1.98438	1.98438	WT		OP50			20	32		heat_stress				0	1		0	0.455347
																						Earendil	20210719_AHS1_WT	Earendil_a::1	WT::OP50::20::heat_stress	a::1	1	a	3.22344	3.43594	1.98438	1.98438	WT		OP50			20	32		heat_stress				0	1		0	0.413681
																						Earendil	20210719_AHS1_WT	Earendil_a::1	WT::OP50::20::heat_stress	a::1	1	a	3.22344	3.43594	1.98438	1.98438	WT		OP50			20	32		heat_stress				0	1		0	-0.002986
																						Earendil	20210719_AHS1_WT	Earendil_a::1	WT::OP50::20::heat_stress	a::1	1	a	3.22344	3.43594	1.98438	1.98438	WT		OP50			20	32		heat_stress				0	1		0	-0.002986
																						Earendil	20210719_AHS1_WT	Earendil_a::1	WT::OP50::20::heat_stress	a::1	1	a	3.22344	3.43594	1.98438	1.98438	WT		OP50			20	32		heat_stress				0	1		0	0.163681
																						Earendil	20210719_AHS1_WT	Earendil_a::1	WT::OP50::20::heat_stress	a::1	1	a	3.22344	3.43594	1.98438	1.98438	WT		OP50			20	32		heat_stress				0	1		0	0.080347
																						Earendil	20210719_AHS1_WT	Earendil_a::1	WT::OP50::20::heat_stress	a::1	1	a	3.22344	3.43594	1.98438	1.98438	WT		OP50			20	32		heat_stress				0	1	Extra worm from multiple-worm disambiguation	0	0.997014
																						Earendil	20210719_AHS1_WT	Earendil_a::1	WT::OP50::20::heat_stress	a::1	1	a	3.22344	3.43594	1.98438	1.98438	WT		OP50			20	32		heat_stress				0	1		0	0.455347
																						Earendil	20210719_AHS1_WT	Earendil_a::1	WT::OP50::20::heat_stress	a::1	1	a	3.22344	3.43594	1.98438	1.98438	WT		OP50			20	32		heat_stress				0	1		0	0.497014
																						Earendil	20210719_AHS1_WT	Earendil_a::1	WT::OP50::20::heat_stress	a::1	1	a	3.22344	3.43594	1.98438	1.98438	WT		OP50			20	32		heat_stress				0	0		0	0.330347
																						Earendil	20210719_AHS1_WT	Earendil_a::1	WT::OP50::20::heat_stress	a::1	1	a	3.22344	3.43594	1.98438	1.98438	WT		OP50			20	32		heat_stress				0	1		0	0.080347
																						Earendil	20210719_AHS1_WT	Earendil_a::1	WT::OP50::20::heat_stress	a::1	1	a	3.22344	3.43594	1.98438	1.98438	WT		OP50			20	32		heat_stress				0	1		0	0.163681
																						Earendil	20210719_AHS1_WT	Earendil_a::1	WT::OP50::20::heat_stress	a::1	1	a	3.22344	3.43594	1.98438	1.98438	WT		OP50			20	32		heat_stress				0	0		0	0.205347
																						Earendil	20210719_AHS1_WT	Earendil_a::1	WT::OP50::20::heat_stress	a::1	1	a	3.22344	3.43594	1.98438	1.98438	WT		OP50			20	32		heat_stress				0	0		0	0.205347
																						Earendil	20210719_AHS1_WT	Earendil_a::1	WT::OP50::20::heat_stress	a::1	1	a	3.22344	3.43594	1.98438	1.98438	WT		OP50			20	32		heat_stress				0	1		0	0.038681
																						Earendil	20210719_AHS1_WT	Earendil_a::1	WT::OP50::20::heat_stress	a::1	1	a	3.22344	3.43594	1.98438	1.98438	WT		OP50			20	32		heat_stress				0	0		0	0.163681
																						Earendil	20210719_AHS1_WT	Earendil_a::1	WT::OP50::20::heat_stress	a::1	1	a	3.22344	3.43594	1.98438	1.98438	WT		OP50			20	32		heat_stress				0	1		0	-0.002986
																						Earendil	20210719_AHS1_WT	Earendil_b::2	col9910X::OP50::20::heat_stress	b::2	2	b	5.17969	5.83438	1.98438	1.9875	col9910X		OP50			20	32		heat_stress				0	1		0	-0.002986
																						Earendil	20210719_AHS1_WT	Earendil_b::2	col9910X::OP50::20::heat_stress	b::2	2	b	5.17969	5.83438	1.98438	1.9875	col9910X		OP50			20	32		heat_stress				0	1		0	0.267847
																						Earendil	20210719_AHS1_WT	Earendil_b::2	col9910X::OP50::20::heat_stress	b::2	2	b	5.17969	5.83438	1.98438	1.9875	col9910X		OP50			20	32		heat_stress				0	1		0	0.059514
																						Earendil	20210719_AHS1_WT	Earendil_b::2	col9910X::OP50::20::heat_stress	b::2	2	b	5.17969	5.83438	1.98438	1.9875	col9910X		OP50			20	32		heat_stress				0	1		0	-0.002986
																						Earendil	20210719_AHS1_WT	Earendil_b::2	col9910X::OP50::20::heat_stress	b::2	2	b	5.17969	5.83438	1.98438	1.9875	col9910X		OP50			20	32		heat_stress				0	1		0	0.059514
																						Earendil	20210719_AHS1_WT	Earendil_b::2	col9910X::OP50::20::heat_stress	b::2	2	b	5.17969	5.83438	1.98438	1.9875	col9910X		OP50			20	32		heat_stress				0	1		0	-0.002986
																						Earendil	20210719_AHS1_WT	Earendil_b::2	col9910X::OP50::20::heat_stress	b::2	2	b	5.17969	5.83438	1.98438	1.9875	col9910X		OP50			20	32		heat_stress				0	1		0	0.017847
																						Earendil	20210719_AHS1_WT	Earendil_b::2	col9910X::OP50::20::heat_stress	b::2	2	b	5.17969	5.83438	1.98438	1.9875	col9910X		OP50			20	32		heat_stress				0	1		0	1.93451
																						Earendil	20210719_AHS1_WT	Earendil_b::2	col9910X::OP50::20::heat_stress	b::2	2	b	5.17969	5.83438	1.98438	1.9875	col9910X		OP50			20	32		heat_stress				0	1		0	0.017847
																						Earendil	20210719_AHS1_WT	Earendil_b::2	col9910X::OP50::20::heat_stress	b::2	2	b	5.17969	5.83438	1.98438	1.9875	col9910X		OP50			20	32		heat_stress				0	1		0	1.93451
																						Earendil	20210719_AHS1_WT	Earendil_b::2	col9910X::OP50::20::heat_stress	b::2	2	b	5.17969	5.83438	1.98438	1.9875	col9910X		OP50			20	32		heat_stress				0	1		0	-0.002986
																						Earendil	20210719_AHS1_WT	Earendil_b::2	col9910X::OP50::20::heat_stress	b::2	2	b	5.17969	5.83438	1.98438	1.9875	col9910X		OP50			20	32		heat_stress				0	1		0	-0.002986
																						Earendil	20210719_AHS1_WT	Earendil_b::2	col9910X::OP50::20::heat_stress	b::2	2	b	5.17969	5.83438	1.98438	1.9875	col9910X		OP50			20	32		heat_stress				0	1		0	0.601181
																						Earendil	20210719_AHS1_WT	Earendil_b::2	col9910X::OP50::20::heat_stress	b::2	2	b	5.17969	5.83438	1.98438	1.9875	col9910X		OP50			20	32		heat_stress				0	1		0	0.059514
																						Earendil	20210719_AHS1_WT	Earendil_b::2	col9910X::OP50::20::heat_stress	b::2	2	b	5.17969	5.83438	1.98438	1.9875	col9910X		OP50			20	32		heat_stress				0	1		0	0.184514
																						Earendil	20210719_AHS1_WT	Earendil_b::2	col9910X::OP50::20::heat_stress	b::2	2	b	5.17969	5.83438	1.98438	1.9875	col9910X		OP50			20	32		heat_stress				0	1		0	0.101181
																						Earendil	20210719_AHS1_WT	Earendil_b::2	col9910X::OP50::20::heat_stress	b::2	2	b	5.17969	5.83438	1.98438	1.9875	col9910X		OP50			20	32		heat_stress				0	1		0	-0.002986
																						Earendil	20210719_AHS1_WT	Earendil_b::2	col9910X::OP50::20::heat_stress	b::2	2	b	5.17969	5.83438	1.98438	1.9875	col9910X		OP50			20	32		heat_stress				0	1		0	-0.002986
																						Earendil	20210719_AHS1_WT	Earendil_b::2	col9910X::OP50::20::heat_stress	b::2	2	b	5.17969	5.83438	1.98438	1.9875	col9910X		OP50			20	32		heat_stress				0	1		0	0.101181
																						Earendil	20210719_AHS1_WT	Earendil_b::2	col9910X::OP50::20::heat_stress	b::2	2	b	5.17969	5.83438	1.98438	1.9875	col9910X		OP50			20	32		heat_stress				0	1		0	-0.002986
																						Earendil	20210719_AHS1_WT	Earendil_b::2	col9910X::OP50::20::heat_stress	b::2	2	b	5.17969	5.83438	1.98438	1.9875	col9910X		OP50			20	32		heat_stress				0	1		0	-0.002986
																						Earendil	20210719_AHS1_WT	Earendil_b::2	col9910X::OP50::20::heat_stress	b::2	2	b	5.17969	5.83438	1.98438	1.9875	col9910X		OP50			20	32		heat_stress				0	1		0	1.76785
																						Earendil	20210719_AHS1_WT	Earendil_b::2	col9910X::OP50::20::heat_stress	b::2	2	b	5.17969	5.83438	1.98438	1.9875	col9910X		OP50			20	32		heat_stress				0	0		0	0.101181
																						Earendil	20210719_AHS1_WT	Earendil_b::2	col9910X::OP50::20::heat_stress	b::2	2	b	5.17969	5.83438	1.98438	1.9875	col9910X		OP50			20	32		heat_stress				0	1		0	0.267847
																						Earendil	20210719_AHS1_WT	Earendil_b::2	col9910X::OP50::20::heat_stress	b::2	2	b	5.17969	5.83438	1.98438	1.9875	col9910X		OP50			20	32		heat_stress				0	1		0	0.059514
																						Earendil	20210719_AHS1_WT	Earendil_b::2	col9910X::OP50::20::heat_stress	b::2	2	b	5.17969	5.83438	1.98438	1.9875	col9910X		OP50			20	32		heat_stress				0	1		0	0.059514
																						Earendil	20210719_AHS1_WT	Earendil_b::2	col9910X::OP50::20::heat_stress	b::2	2	b	5.17969	5.83438	1.98438	1.9875	col9910X		OP50			20	32		heat_stress				0	1		0	0.017847
																						Earendil	20210719_AHS1_WT	Earendil_b::2	col9910X::OP50::20::heat_stress	b::2	2	b	5.17969	5.83438	1.98438	1.9875	col9910X		OP50			20	32		heat_stress				0	1		0	0.392847
																						Earendil	20210719_AHS1_WT	Earendil_b::2	col9910X::OP50::20::heat_stress	b::2	2	b	5.17969	5.83438	1.98438	1.9875	col9910X		OP50			20	32		heat_stress				0	1		0	0.809514
																						Earendil	20210719_AHS1_WT	Earendil_b::2	col9910X::OP50::20::heat_stress	b::2	2	b	5.17969	5.83438	1.98438	1.9875	col9910X		OP50			20	32		heat_stress				0	1		0	0.017847
																						Earendil	20210719_AHS1_WT	Earendil_b::2	col9910X::OP50::20::heat_stress	b::2	2	b	5.17969	5.83438	1.98438	1.9875	col9910X		OP50			20	32		heat_stress				0	1		0	0.101181
																						Earendil	20210719_AHS1_WT	Earendil_b::2	col9910X::OP50::20::heat_stress	b::2	2	b	5.17969	5.83438	1.98438	1.9875	col9910X		OP50			20	32		heat_stress				0	1		0	0.601181
																						Earendil	20210719_AHS1_WT	Earendil_b::2	col9910X::OP50::20::heat_stress	b::2	2	b	5.17969	5.83438	1.98438	1.9875	col9910X		OP50			20	32		heat_stress				0	1		0	-0.002986
																						Earendil	20210719_AHS1_WT	Earendil_b::2	col9910X::OP50::20::heat_stress	b::2	2	b	5.17969	5.83438	1.98438	1.9875	col9910X		OP50			20	32		heat_stress				0	0		0	0.434514
																						Earendil	20210719_AHS1_WT	Earendil_b::2	col9910X::OP50::20::heat_stress	b::2	2	b	5.17969	5.83438	1.98438	1.9875	col9910X		OP50			20	32		heat_stress				0	1		0	0.726181
																						Earendil	20210719_AHS1_WT	Earendil_b::2	col9910X::OP50::20::heat_stress	b::2	2	b	5.17969	5.83438	1.98438	1.9875	col9910X		OP50			20	32		heat_stress				0	1		0	-0.002986
																						Earendil	20210719_AHS1_WT	Earendil_b::2	col9910X::OP50::20::heat_stress	b::2	2	b	5.17969	5.83438	1.98438	1.9875	col9910X		OP50			20	32		heat_stress				0	1		0	0.767847
																						Earendil	20210719_AHS1_WT	Earendil_b::2	col9910X::OP50::20::heat_stress	b::2	2	b	5.17969	5.83438	1.98438	1.9875	col9910X		OP50			20	32		heat_stress				0	0		0	0.517847
																						Earendil	20210719_AHS1_WT	Earendil_b::2	col9910X::OP50::20::heat_stress	b::2	2	b	5.17969	5.83438	1.98438	1.9875	col9910X		OP50			20	32		heat_stress				0	0		0	0.726181
																						Earendil	20210719_AHS1_WT	Earendil_b::2	col9910X::OP50::20::heat_stress	b::2	2	b	5.17969	5.83438	1.98438	1.9875	col9910X		OP50			20	32		heat_stress				0	0		0	0.684514
																						Earendil	20210719_AHS1_WT	Earendil_b::2	col9910X::OP50::20::heat_stress	b::2	2	b	5.17969	5.83438	1.98438	1.9875	col9910X		OP50			20	32		heat_stress				0	0		0	0.726181
																						Earendil	20210719_AHS1_WT	Earendil_b::2	col9910X::OP50::20::heat_stress	b::2	2	b	5.17969	5.83438	1.98438	1.9875	col9910X		OP50			20	32		heat_stress				0	0		0	0.059514
																						Earendil	20210719_AHS1_WT	Earendil_b::2	col9910X::OP50::20::heat_stress	b::2	2	b	5.17969	5.83438	1.98438	1.9875	col9910X		OP50			20	32		heat_stress				0	1		0	0.017847
																						Earendil	20210719_AHS1_WT	Earendil_b::2	col9910X::OP50::20::heat_stress	b::2	2	b	5.17969	5.83438	1.98438	1.9875	col9910X		OP50			20	32		heat_stress				0	1		0	0.642847
																						Earendil	20210719_AHS1_WT	Earendil_b::2	col9910X::OP50::20::heat_stress	b::2	2	b	5.17969	5.83438	1.98438	1.9875	col9910X		OP50			20	32		heat_stress				0	1		0	0.309514
																						Earendil	20210719_AHS1_WT	Earendil_b::2	col9910X::OP50::20::heat_stress	b::2	2	b	5.17969	5.83438	1.98438	1.9875	col9910X		OP50			20	32		heat_stress				0	0		0	-0.002986
																						Earendil	20210719_AHS1_WT	Earendil_b::2	col9910X::OP50::20::heat_stress	b::2	2	b	5.17969	5.83438	1.98438	1.9875	col9910X		OP50			20	32		heat_stress				0	0		0	0.642847
																						Earendil	20210719_AHS1_WT	Earendil_b::2	col9910X::OP50::20::heat_stress	b::2	2	b	5.17969	5.83438	1.98438	1.9875	col9910X		OP50			20	32		heat_stress				0	0		0	0.642847
																						Earendil	20210719_AHS1_WT	Earendil_b::2	col9910X::OP50::20::heat_stress	b::2	2	b	5.17969	5.83438	1.98438	1.9875	col9910X		OP50			20	32		heat_stress				0	0		0	0.601181
																						Earendil	20210719_AHS1_WT	Earendil_b::2	col9910X::OP50::20::heat_stress	b::2	2	b	5.17969	5.83438	1.98438	1.9875	col9910X		OP50			20	32		heat_stress				0	0		0	0.059514
																						Earendil	20210719_AHS1_WT	Earendil_b::2	col9910X::OP50::20::heat_stress	b::2	2	b	5.17969	5.83438	1.98438	1.9875	col9910X		OP50			20	32		heat_stress				0	0		0	0.601181
																						Earendil	20210719_AHS1_WT	Earendil_b::2	col9910X::OP50::20::heat_stress	b::2	2	b	5.17969	5.83438	1.98438	1.9875	col9910X		OP50			20	32		heat_stress				0	1		0	0.017847
																						Earendil	20210719_AHS1_WT	Earendil_b::2	col9910X::OP50::20::heat_stress	b::2	2	b	5.17969	5.83438	1.98438	1.9875	col9910X		OP50			20	32		heat_stress				0	1		0	-0.002986
																						Earendil	20210719_AHS1_WT	Earendil_b::2	col9910X::OP50::20::heat_stress	b::2	2	b	5.17969	5.83438	1.98438	1.9875	col9910X		OP50			20	32		heat_stress				0	0		0	0.559514
																						Earendil	20210719_AHS1_WT	Earendil_b::2	col9910X::OP50::20::heat_stress	b::2	2	b	5.17969	5.83438	1.98438	1.9875	col9910X		OP50			20	32		heat_stress				0	1		0	0.017847
																						Earendil	20210719_AHS1_WT	Earendil_b::2	col9910X::OP50::20::heat_stress	b::2	2	b	5.17969	5.83438	1.98438	1.9875	col9910X		OP50			20	32		heat_stress				0	0		0	-0.002986
																						Earendil	20210719_AHS1_WT	Earendil_b::2	col9910X::OP50::20::heat_stress	b::2	2	b	5.17969	5.83438	1.98438	1.9875	col9910X		OP50			20	32		heat_stress				0	0		0	0.392847
																						Earendil	20210719_AHS1_WT	Earendil_b::2	col9910X::OP50::20::heat_stress	b::2	2	b	5.17969	5.83438	1.98438	1.9875	col9910X		OP50			20	32		heat_stress				0	0		0	0.517847
																						Earendil	20210719_AHS1_WT	Earendil_b::2	col9910X::OP50::20::heat_stress	b::2	2	b	5.17969	5.83438	1.98438	1.9875	col9910X		OP50			20	32		heat_stress				0	1		0	-0.002986
																						Earendil	20210719_AHS1_WT	Earendil_b::2	col9910X::OP50::20::heat_stress	b::2	2	b	5.17969	5.83438	1.98438	1.9875	col9910X		OP50			20	32		heat_stress				0	0		0	0.476181
																						Earendil	20210719_AHS1_WT	Earendil_b::2	col9910X::OP50::20::heat_stress	b::2	2	b	5.17969	5.83438	1.98438	1.9875	col9910X		OP50			20	32		heat_stress				0	0		0	0.017847
																						Earendil	20210719_AHS1_WT	Earendil_b::2	col9910X::OP50::20::heat_stress	b::2	2	b	5.17969	5.83438	1.98438	1.9875	col9910X		OP50			20	32		heat_stress				0	0		0	0.392847
																						Earendil	20210719_AHS1_WT	Earendil_b::2	col9910X::OP50::20::heat_stress	b::2	2	b	5.17969	5.83438	1.98438	1.9875	col9910X		OP50			20	32		heat_stress				0	0		0	0.059514
																						Earendil	20210719_AHS1_WT	Earendil_b::2	col9910X::OP50::20::heat_stress	b::2	2	b	5.17969	5.83438	1.98438	1.9875	col9910X		OP50			20	32		heat_stress				0	0		0	0.434514
																						Earendil	20210719_AHS1_WT	Earendil_b::2	col9910X::OP50::20::heat_stress	b::2	2	b	5.17969	5.83438	1.98438	1.9875	col9910X		OP50			20	32		heat_stress				0	0		0	0.017847
																						Earendil	20210719_AHS1_WT	Earendil_b::2	col9910X::OP50::20::heat_stress	b::2	2	b	5.17969	5.83438	1.98438	1.9875	col9910X		OP50			20	32		heat_stress				0	0		0	0.434514
																						Earendil	20210719_AHS1_WT	Earendil_b::2	col9910X::OP50::20::heat_stress	b::2	2	b	5.17969	5.83438	1.98438	1.9875	col9910X		OP50			20	32		heat_stress				0	0		0	0.184514
																						Earendil	20210719_AHS1_WT	Earendil_b::2	col9910X::OP50::20::heat_stress	b::2	2	b	5.17969	5.83438	1.98438	1.9875	col9910X		OP50			20	32		heat_stress				0	0		0	0.059514
																						Earendil	20210719_AHS1_WT	Earendil_b::2	col9910X::OP50::20::heat_stress	b::2	2	b	5.17969	5.83438	1.98438	1.9875	col9910X		OP50			20	32		heat_stress				0	0		0	0.017847
																						Earendil	20210719_AHS1_WT	Earendil_b::2	col9910X::OP50::20::heat_stress	b::2	2	b	5.17969	5.83438	1.98438	1.9875	col9910X		OP50			20	32		heat_stress				0	0		0	0.392847
																						Earendil	20210719_AHS1_WT	Earendil_b::2	col9910X::OP50::20::heat_stress	b::2	2	b	5.17969	5.83438	1.98438	1.9875	col9910X		OP50			20	32		heat_stress				0	1	Extra worm from multiple-worm disambiguation	0	0.017847
																						Earendil	20210719_AHS1_WT	Earendil_b::2	col9910X::OP50::20::heat_stress	b::2	2	b	5.17969	5.83438	1.98438	1.9875	col9910X		OP50			20	32		heat_stress				0	0		0	0.017847
																						Earendil	20210719_AHS1_WT	Earendil_b::2	col9910X::OP50::20::heat_stress	b::2	2	b	5.17969	5.83438	1.98438	1.9875	col9910X		OP50			20	32		heat_stress				0	1		0	0.017847
																						Earendil	20210719_AHS1_WT	Earendil_b::2	col9910X::OP50::20::heat_stress	b::2	2	b	5.17969	5.83438	1.98438	1.9875	col9910X		OP50			20	32		heat_stress				0	0		0	0.017847
																						Earendil	20210719_AHS1_WT	Earendil_b::2	col9910X::OP50::20::heat_stress	b::2	2	b	5.17969	5.83438	1.98438	1.9875	col9910X		OP50			20	32		heat_stress				0	0		0	0.059514
																						Earendil	20210719_AHS1_WT	Earendil_b::2	col9910X::OP50::20::heat_stress	b::2	2	b	5.17969	5.83438	1.98438	1.9875	col9910X		OP50			20	32		heat_stress				0	0		0	0.226181
																						Earendil	20210719_AHS1_WT	Earendil_b::2	col9910X::OP50::20::heat_stress	b::2	2	b	5.17969	5.83438	1.98438	1.9875	col9910X		OP50			20	32		heat_stress				0	0		0	0.226181
																						Earendil	20210719_AHS1_WT	Earendil_b::2	col9910X::OP50::20::heat_stress	b::2	2	b	5.17969	5.83438	1.98438	1.9875	col9910X		OP50			20	32		heat_stress				0	1		0	0.059514
																						Earendil	20210719_AHS1_WT	Earendil_b::2	col9910X::OP50::20::heat_stress	b::2	2	b	5.17969	5.83438	1.98438	1.9875	col9910X		OP50			20	32		heat_stress				0	0		0	0.059514
																						Earendil	20210719_AHS1_WT	Earendil_b::2	col9910X::OP50::20::heat_stress	b::2	2	b	5.17969	5.83438	1.98438	1.9875	col9910X		OP50			20	32		heat_stress				0	1		0	0.017847
																						Earendil	20210719_AHS1_WT	Earendil_b::2	col9910X::OP50::20::heat_stress	b::2	2	b	5.17969	5.83438	1.98438	1.9875	col9910X		OP50			20	32		heat_stress				0	0		0	-0.002986
																						Earendil	20210719_AHS1_WT	Earendil_b::2	col9910X::OP50::20::heat_stress	b::2	2	b	5.17969	5.83438	1.98438	1.9875	col9910X		OP50			20	32		heat_stress				0	0		0	0.059514
																						Earendil	20210719_AHS1_WT	Earendil_b::2	col9910X::OP50::20::heat_stress	b::2	2	b	5.17969	5.83438	1.98438	1.9875	col9910X		OP50			20	32		heat_stress				0	0		0	0.101181
																						Earendil	20210719_AHS1_WT	Earendil_b::2	col9910X::OP50::20::heat_stress	b::2	2	b	5.17969	5.83438	1.98438	1.9875	col9910X		OP50			20	32		heat_stress				0	1		0	0.059514
																						Earendil	20210719_AHS1_WT	Earendil_b::2	col9910X::OP50::20::heat_stress	b::2	2	b	5.17969	5.83438	1.98438	1.9875	col9910X		OP50			20	32		heat_stress				0	0		0	0.017847
																						Earendil	20210719_AHS1_WT	Earendil_b::2	col9910X::OP50::20::heat_stress	b::2	2	b	5.17969	5.83438	1.98438	1.9875	col9910X		OP50			20	32		heat_stress				0	0		0	0.059514
																						Earendil	20210719_AHS1_WT	Earendil_b::2	col9910X::OP50::20::heat_stress	b::2	2	b	5.17969	5.83438	1.98438	1.9875	col9910X		OP50			20	32		heat_stress				0	1	Extra worm from multiple-worm disambiguation	0	0.017847
																						Earendil	20210719_AHS1_WT	Earendil_b::2	col9910X::OP50::20::heat_stress	b::2	2	b	5.17969	5.83438	1.98438	1.9875	col9910X		OP50			20	32		heat_stress				0	1		0	-0.002986
																						Earendil	20210719_AHS1_WT	Earendil_b::2	col9910X::OP50::20::heat_stress	b::2	2	b	5.17969	5.83438	1.98438	1.9875	col9910X		OP50			20	32		heat_stress				0	1		0	-0.002986
																						Earendil	20210719_AHS1_WT	Earendil_b::2	col9910X::OP50::20::heat_stress	b::2	2	b	5.17969	5.83438	1.98438	1.9875	col9910X		OP50			20	32		heat_stress				0	0		0	-0.002986
																						Earendil	20210719_AHS1_WT	Earendil_b::2	col9910X::OP50::20::heat_stress	b::2	2	b	5.17969	5.83438	1.98438	1.9875	col9910X		OP50			20	32		heat_stress				0	1		0	0.101181
																						Earendil	20210719_AHS1_WT	Earendil_b::2	col9910X::OP50::20::heat_stress	b::2	2	b	5.17969	5.83438	1.98438	1.9875	col9910X		OP50			20	32		heat_stress				0	1		0	-0.002986
																						Earendil	20210719_AHS1_WT	Earendil_b::2	col9910X::OP50::20::heat_stress	b::2	2	b	5.17969	5.83438	1.98438	1.9875	col9910X		OP50			20	32		heat_stress				0	1		0	-0.002986
																						Earendil	20210719_AHS1_WT	Earendil_b::2	col9910X::OP50::20::heat_stress	b::2	2	b	5.17969	5.83438	1.98438	1.9875	col9910X		OP50			20	32		heat_stress				0	1		0	-0.002986
																						Earendil	20210719_AHS1_WT	Earendil_b::2	col9910X::OP50::20::heat_stress	b::2	2	b	5.17969	5.83438	1.98438	1.9875	col9910X		OP50			20	32		heat_stress				0	1		0	-0.002986
																						Earendil	20210719_AHS1_WT	Earendil_b::2	col9910X::OP50::20::heat_stress	b::2	2	b	5.17969	5.83438	1.98438	1.9875	col9910X		OP50			20	32		heat_stress				0	1		0	-0.002986
																						Earendil	20210719_AHS1_WT	Earendil_b::2	col9910X::OP50::20::heat_stress	b::2	2	b	5.17969	5.83438	1.98438	1.9875	col9910X		OP50			20	32		heat_stress				0	1		0	-0.002986
																						Earendil	20210719_AHS1_WT	Earendil_b::2	col9910X::OP50::20::heat_stress	b::2	2	b	5.17969	5.83438	1.98438	1.9875	col9910X		OP50			20	32		heat_stress				0	1		0	-0.002986
																						Earendil	20210719_AHS1_WT	Earendil_b::2	col9910X::OP50::20::heat_stress	b::2	2	b	5.17969	5.83438	1.98438	1.9875	col9910X		OP50			20	32		heat_stress				0	1		0	-0.002986
																						Earendil	20210719_AHS1_WT	Earendil_b::2	col9910X::OP50::20::heat_stress	b::2	2	b	5.17969	5.83438	1.98438	1.9875	col9910X		OP50			20	32		heat_stress				0	1		0	-0.002986
																						Earendil	20210719_AHS1_WT	Earendil_b::2	col9910X::OP50::20::heat_stress	b::2	2	b	5.17969	5.83438	1.98438	1.9875	col9910X		OP50			20	32		heat_stress				0	1		0	-0.002986
																						Earendil	20210719_AHS1_WT	Earendil_b::2	col9910X::OP50::20::heat_stress	b::2	2	b	5.17969	5.83438	1.98438	1.9875	col9910X		OP50			20	32		heat_stress				0	1		0	-0.002986
																						Earendil	20210719_AHS1_WT	Earendil_b::2	col9910X::OP50::20::heat_stress	b::2	2	b	5.17969	5.83438	1.98438	1.9875	col9910X		OP50			20	32		heat_stress				0	1		0	-0.002986
																						Earendil	20210719_AHS1_WT	Earendil_b::2	col9910X::OP50::20::heat_stress	b::2	2	b	5.17969	5.83438	1.98438	1.9875	col9910X		OP50			20	32		heat_stress				0	1		0	0.017847
																						Earendil	20210719_AHS1_WT	Earendil_b::2	col9910X::OP50::20::heat_stress	b::2	2	b	5.17969	5.83438	1.98438	1.9875	col9910X		OP50			20	32		heat_stress				0	1		0	0.059514
																						Earendil	20210719_AHS1_WT	Earendil_b::2	col9910X::OP50::20::heat_stress	b::2	2	b	5.17969	5.83438	1.98438	1.9875	col9910X		OP50			20	32		heat_stress				0	1		0	-0.002986
																						Earendil	20210719_AHS1_WT	Earendil_b::2	col9910X::OP50::20::heat_stress	b::2	2	b	5.17969	5.83438	1.98438	1.9875	col9910X		OP50			20	32		heat_stress				0	1		0	-0.002986
																						Earendil	20210719_AHS1_WT	Earendil_b::2	col9910X::OP50::20::heat_stress	b::2	2	b	5.17969	5.83438	1.98438	1.9875	col9910X		OP50			20	32		heat_stress				0	1		0	0.017847
																						Earendil	20210719_AHS1_WT	Earendil_b::2	col9910X::OP50::20::heat_stress	b::2	2	b	5.17969	5.83438	1.98438	1.9875	col9910X		OP50			20	32		heat_stress				0	1		0	-0.002986
																						Earendil	20210719_AHS1_WT	Earendil_b::2	col9910X::OP50::20::heat_stress	b::2	2	b	5.17969	5.83438	1.98438	1.9875	col9910X		OP50			20	32		heat_stress				0	1		0	-0.002986
																						Earendil	20210719_AHS1_WT	Earendil_b::2	col9910X::OP50::20::heat_stress	b::2	2	b	5.17969	5.83438	1.98438	1.9875	col9910X		OP50			20	32		heat_stress				0	1		0	0.017847
																						Earendil	20210719_AHS1_WT	Earendil_b::2	col9910X::OP50::20::heat_stress	b::2	2	b	5.17969	5.83438	1.98438	1.9875	col9910X		OP50			20	32		heat_stress				0	0		0	0.059514
																						Earendil	20210719_AHS1_WT	Earendil_b::2	col9910X::OP50::20::heat_stress	b::2	2	b	5.17969	5.83438	1.98438	1.9875	col9910X		OP50			20	32		heat_stress				0	1		0	-0.002986
																						Earendil	20210719_AHS1_WT	Earendil_b::2	col9910X::OP50::20::heat_stress	b::2	2	b	5.17969	5.83438	1.98438	1.9875	col9910X		OP50			20	32		heat_stress				0	1		0	0.059514
																						Earendil	20210719_AHS1_WT	Earendil_b::2	col9910X::OP50::20::heat_stress	b::2	2	b	5.17969	5.83438	1.98438	1.9875	col9910X		OP50			20	32		heat_stress				0	1		0	-0.002986
																						Earendil	20210719_AHS1_WT	Earendil_b::2	col9910X::OP50::20::heat_stress	b::2	2	b	5.17969	5.83438	1.98438	1.9875	col9910X		OP50			20	32		heat_stress				0	0		0	0.059514
																						Earendil	20210719_AHS1_WT	Earendil_b::2	col9910X::OP50::20::heat_stress	b::2	2	b	5.17969	5.83438	1.98438	1.9875	col9910X		OP50			20	32		heat_stress				0	1		0	0.059514
																						Earendil	20210719_AHS1_WT	Earendil_b::2	col9910X::OP50::20::heat_stress	b::2	2	b	5.17969	5.83438	1.98438	1.9875	col9910X		OP50			20	32		heat_stress				0	1		0	-0.002986
																						Earendil	20210719_AHS1_WT	Earendil_b::2	col9910X::OP50::20::heat_stress	b::2	2	b	5.17969	5.83438	1.98438	1.9875	col9910X		OP50			20	32		heat_stress				0	1		0	-0.002986
																						Earendil	20210719_AHS1_WT	Earendil_b::2	col9910X::OP50::20::heat_stress	b::2	2	b	5.17969	5.83438	1.98438	1.9875	col9910X		OP50			20	32		heat_stress				0	0		0	0.017847
																						Earendil	20210719_AHS1_WT	Earendil_b::2	col9910X::OP50::20::heat_stress	b::2	2	b	5.17969	5.83438	1.98438	1.9875	col9910X		OP50			20	32		heat_stress				0	1		0	0.059514
																						Earendil	20210719_AHS1_WT	Earendil_b::2	col9910X::OP50::20::heat_stress	b::2	2	b	5.17969	5.83438	1.98438	1.9875	col9910X		OP50			20	32		heat_stress				0	1		0	-0.002986
																						Earendil	20210719_AHS1_WT	Earendil_b::2	col9910X::OP50::20::heat_stress	b::2	2	b	5.17969	5.83438	1.98438	1.9875	col9910X		OP50			20	32		heat_stress				0	1		0	0.017847
																						Earendil	20210719_AHS1_WT	Earendil_b::2	col9910X::OP50::20::heat_stress	b::2	2	b	5.17969	5.83438	1.98438	1.9875	col9910X		OP50			20	32		heat_stress				0	1		0	-0.002986
																						Earendil	20210719_AHS1_WT	Earendil_b::2	col9910X::OP50::20::heat_stress	b::2	2	b	5.17969	5.83438	1.98438	1.9875	col9910X		OP50			20	32		heat_stress				0	1		0	-0.002986
																						Earendil	20210719_AHS1_WT	Earendil_b::2	col9910X::OP50::20::heat_stress	b::2	2	b	5.17969	5.83438	1.98438	1.9875	col9910X		OP50			20	32		heat_stress				0	1		0	0.101181
																						Earendil	20210719_AHS1_WT	Earendil_b::2	col9910X::OP50::20::heat_stress	b::2	2	b	5.17969	5.83438	1.98438	1.9875	col9910X		OP50			20	32		heat_stress				0	1		0	0.017847
																						Earendil	20210719_AHS1_WT	Earendil_b::2	col9910X::OP50::20::heat_stress	b::2	2	b	5.17969	5.83438	1.98438	1.9875	col9910X		OP50			20	32		heat_stress				0	1		0	0.017847
																						Earendil	20210719_AHS1_WT	Earendil_b::2	col9910X::OP50::20::heat_stress	b::2	2	b	5.17969	5.83438	1.98438	1.9875	col9910X		OP50			20	32		heat_stress				0	0		0	0.392847
																						Earendil	20210719_AHS1_WT	Earendil_b::2	col9910X::OP50::20::heat_stress	b::2	2	b	5.17969	5.83438	1.98438	1.9875	col9910X		OP50			20	32		heat_stress				0	1		0	0.142847
																						Earendil	20210719_AHS1_WT	Earendil_b::2	col9910X::OP50::20::heat_stress	b::2	2	b	5.17969	5.83438	1.98438	1.9875	col9910X		OP50			20	32		heat_stress				0	1		0	0.017847
																						Earendil	20210719_AHS1_WT	Earendil_b::2	col9910X::OP50::20::heat_stress	b::2	2	b	5.17969	5.83438	1.98438	1.9875	col9910X		OP50			20	32		heat_stress				0	1		0	0.767847
																						Earendil	20210719_AHS1_WT	Earendil_b::2	col9910X::OP50::20::heat_stress	b::2	2	b	5.17969	5.83438	1.98438	1.9875	col9910X		OP50			20	32		heat_stress				0	1		0	0.226181
																						Earendil	20210719_AHS1_WT	Earendil_b::2	col9910X::OP50::20::heat_stress	b::2	2	b	5.17969	5.83438	1.98438	1.9875	col9910X		OP50			20	32		heat_stress				0	1		0	0.017847
																						Earendil	20210719_AHS1_WT	Earendil_b::2	col9910X::OP50::20::heat_stress	b::2	2	b	5.17969	5.83438	1.98438	1.9875	col9910X		OP50			20	32		heat_stress				0	1		0	-0.002986
																						Earendil	20210719_AHS1_WT	Earendil_b::2	col9910X::OP50::20::heat_stress	b::2	2	b	5.17969	5.83438	1.98438	1.9875	col9910X		OP50			20	32		heat_stress				0	1		0	0.434514
																						Earendil	20210719_AHS1_WT	Earendil_b::2	col9910X::OP50::20::heat_stress	b::2	2	b	5.17969	5.83438	1.98438	1.9875	col9910X		OP50			20	32		heat_stress				0	1		0	-0.002986
																						Earendil	20210719_AHS1_WT	Earendil_b::2	col9910X::OP50::20::heat_stress	b::2	2	b	5.17969	5.83438	1.98438	1.9875	col9910X		OP50			20	32		heat_stress				0	1		0	0.184514
																						Earendil	20210719_AHS1_WT	Earendil_b::2	col9910X::OP50::20::heat_stress	b::2	2	b	5.17969	5.83438	1.98438	1.9875	col9910X		OP50			20	32		heat_stress				0	1		0	-0.002986
																						Earendil	20210719_AHS1_WT	Earendil_b::2	col9910X::OP50::20::heat_stress	b::2	2	b	5.17969	5.83438	1.98438	1.9875	col9910X		OP50			20	32		heat_stress				0	0		0	0.267847
																						Earendil	20210719_AHS1_WT	Earendil_b::2	col9910X::OP50::20::heat_stress	b::2	2	b	5.17969	5.83438	1.98438	1.9875	col9910X		OP50			20	32		heat_stress				0	0		0	0.351181
																						Earendil	20210719_AHS1_WT	Earendil_b::2	col9910X::OP50::20::heat_stress	b::2	2	b	5.17969	5.83438	1.98438	1.9875	col9910X		OP50			20	32		heat_stress				0	0		0	0.309514
																						Earendil	20210719_AHS1_WT	Earendil_b::2	col9910X::OP50::20::heat_stress	b::2	2	b	5.17969	5.83438	1.98438	1.9875	col9910X		OP50			20	32		heat_stress				0	0		0	0.101181
																						Earendil	20210719_AHS1_WT	Earendil_b::2	col9910X::OP50::20::heat_stress	b::2	2	b	5.17969	5.83438	1.98438	1.9875	col9910X		OP50			20	32		heat_stress				0	0		0	0.142847
																						Earendil	20210719_AHS1_WT	Earendil_b::2	col9910X::OP50::20::heat_stress	b::2	2	b	5.17969	5.83438	1.98438	1.9875	col9910X		OP50			20	32		heat_stress				0	0		0	0.017847
																						Earendil	20210719_AHS1_WT	Earendil_b::2	col9910X::OP50::20::heat_stress	b::2	2	b	5.17969	5.83438	1.98438	1.9875	col9910X		OP50			20	32		heat_stress				0	0		0	0.059514
																						Earendil	20210719_AHS1_WT	Earendil_b::2	col9910X::OP50::20::heat_stress	b::2	2	b	5.17969	5.83438	1.98438	1.9875	col9910X		OP50			20	32		heat_stress				0	0		0	0.059514
																						Earendil	20210719_AHS1_WT	Earendil_b::2	col9910X::OP50::20::heat_stress	b::2	2	b	5.17969	5.83438	1.98438	1.9875	col9910X		OP50			20	32		heat_stress				0	0		0	0.184514
																						Earendil	20210719_AHS1_WT	Earendil_b::2	col9910X::OP50::20::heat_stress	b::2	2	b	5.17969	5.83438	1.98438	1.9875	col9910X		OP50			20	32		heat_stress				0	0		0	0.101181
																						Earendil	20210719_AHS1_WT	Earendil_a::2	WT::OP50::20::heat_stress	a::2	2	a	3.29844	5.73438	1.98438	1.9875	WT		OP50			20	32		heat_stress				0	1		0	1.47618
																						Earendil	20210719_AHS1_WT	Earendil_a::2	WT::OP50::20::heat_stress	a::2	2	a	3.29844	5.73438	1.98438	1.9875	WT		OP50			20	32		heat_stress				0	1		0	1.66368
																						Earendil	20210719_AHS1_WT	Earendil_a::2	WT::OP50::20::heat_stress	a::2	2	a	3.29844	5.73438	1.98438	1.9875	WT		OP50			20	32		heat_stress				0	1		0	1.70535
																						Earendil	20210719_AHS1_WT	Earendil_a::2	WT::OP50::20::heat_stress	a::2	2	a	3.29844	5.73438	1.98438	1.9875	WT		OP50			20	32		heat_stress				0	1		0	1.47618
																						Earendil	20210719_AHS1_WT	Earendil_a::2	WT::OP50::20::heat_stress	a::2	2	a	3.29844	5.73438	1.98438	1.9875	WT		OP50			20	32		heat_stress				0	1		0	1.47618
																						Earendil	20210719_AHS1_WT	Earendil_a::2	WT::OP50::20::heat_stress	a::2	2	a	3.29844	5.73438	1.98438	1.9875	WT		OP50			20	32		heat_stress				0	1		0	1.66368
																						Earendil	20210719_AHS1_WT	Earendil_a::2	WT::OP50::20::heat_stress	a::2	2	a	3.29844	5.73438	1.98438	1.9875	WT		OP50			20	32		heat_stress				0	1		0	1.47618
																						Earendil	20210719_AHS1_WT	Earendil_a::2	WT::OP50::20::heat_stress	a::2	2	a	3.29844	5.73438	1.98438	1.9875	WT		OP50			20	32		heat_stress				0	1		0	1.47618
																						Earendil	20210719_AHS1_WT	Earendil_a::2	WT::OP50::20::heat_stress	a::2	2	a	3.29844	5.73438	1.98438	1.9875	WT		OP50			20	32		heat_stress				0	1		0	1.47618
																						Earendil	20210719_AHS1_WT	Earendil_a::2	WT::OP50::20::heat_stress	a::2	2	a	3.29844	5.73438	1.98438	1.9875	WT		OP50			20	32		heat_stress				0	1		0	1.62201
																						Earendil	20210719_AHS1_WT	Earendil_a::2	WT::OP50::20::heat_stress	a::2	2	a	3.29844	5.73438	1.98438	1.9875	WT		OP50			20	32		heat_stress				0	1		0	1.70535
																						Earendil	20210719_AHS1_WT	Earendil_a::2	WT::OP50::20::heat_stress	a::2	2	a	3.29844	5.73438	1.98438	1.9875	WT		OP50			20	32		heat_stress				0	1		0	1.47618
																						Earendil	20210719_AHS1_WT	Earendil_a::2	WT::OP50::20::heat_stress	a::2	2	a	3.29844	5.73438	1.98438	1.9875	WT		OP50			20	32		heat_stress				0	1		0	2.03868
																						Earendil	20210719_AHS1_WT	Earendil_a::2	WT::OP50::20::heat_stress	a::2	2	a	3.29844	5.73438	1.98438	1.9875	WT		OP50			20	32		heat_stress				0	1		0	1.47618
																						Earendil	20210719_AHS1_WT	Earendil_a::2	WT::OP50::20::heat_stress	a::2	2	a	3.29844	5.73438	1.98438	1.9875	WT		OP50			20	32		heat_stress				0	1		0	1.47618
																						Earendil	20210719_AHS1_WT	Earendil_a::2	WT::OP50::20::heat_stress	a::2	2	a	3.29844	5.73438	1.98438	1.9875	WT		OP50			20	32		heat_stress				0	1		0	1.47618
																						Earendil	20210719_AHS1_WT	Earendil_a::2	WT::OP50::20::heat_stress	a::2	2	a	3.29844	5.73438	1.98438	1.9875	WT		OP50			20	32		heat_stress				0	1		0	1.83035
																						Earendil	20210719_AHS1_WT	Earendil_a::2	WT::OP50::20::heat_stress	a::2	2	a	3.29844	5.73438	1.98438	1.9875	WT		OP50			20	32		heat_stress				0	1		0	1.49701
																						Earendil	20210719_AHS1_WT	Earendil_a::2	WT::OP50::20::heat_stress	a::2	2	a	3.29844	5.73438	1.98438	1.9875	WT		OP50			20	32		heat_stress				0	1		0	2.03868
																						Earendil	20210719_AHS1_WT	Earendil_a::2	WT::OP50::20::heat_stress	a::2	2	a	3.29844	5.73438	1.98438	1.9875	WT		OP50			20	32		heat_stress				0	1		0	1.47618
																						Earendil	20210719_AHS1_WT	Earendil_a::2	WT::OP50::20::heat_stress	a::2	2	a	3.29844	5.73438	1.98438	1.9875	WT		OP50			20	32		heat_stress				0	1		0	1.78868
																						Earendil	20210719_AHS1_WT	Earendil_a::2	WT::OP50::20::heat_stress	a::2	2	a	3.29844	5.73438	1.98438	1.9875	WT		OP50			20	32		heat_stress				0	1		0	1.58035
																						Earendil	20210719_AHS1_WT	Earendil_a::2	WT::OP50::20::heat_stress	a::2	2	a	3.29844	5.73438	1.98438	1.9875	WT		OP50			20	32		heat_stress				0	1		0	1.49701
																						Earendil	20210719_AHS1_WT	Earendil_a::2	WT::OP50::20::heat_stress	a::2	2	a	3.29844	5.73438	1.98438	1.9875	WT		OP50			20	32		heat_stress				0	1		0	1.47618
																						Earendil	20210719_AHS1_WT	Earendil_a::2	WT::OP50::20::heat_stress	a::2	2	a	3.29844	5.73438	1.98438	1.9875	WT		OP50			20	32		heat_stress				0	1		0	1.47618
																						Earendil	20210719_AHS1_WT	Earendil_a::2	WT::OP50::20::heat_stress	a::2	2	a	3.29844	5.73438	1.98438	1.9875	WT		OP50			20	32		heat_stress				0	1		0	1.58035
																						Earendil	20210719_AHS1_WT	Earendil_a::2	WT::OP50::20::heat_stress	a::2	2	a	3.29844	5.73438	1.98438	1.9875	WT		OP50			20	32		heat_stress				0	1		0	1.70535
																						Earendil	20210719_AHS1_WT	Earendil_a::2	WT::OP50::20::heat_stress	a::2	2	a	3.29844	5.73438	1.98438	1.9875	WT		OP50			20	32		heat_stress				0	1		0	1.53868
																						Earendil	20210719_AHS1_WT	Earendil_a::2	WT::OP50::20::heat_stress	a::2	2	a	3.29844	5.73438	1.98438	1.9875	WT		OP50			20	32		heat_stress				0	1		0	2.03868
																						Earendil	20210719_AHS1_WT	Earendil_a::2	WT::OP50::20::heat_stress	a::2	2	a	3.29844	5.73438	1.98438	1.9875	WT		OP50			20	32		heat_stress				0	1		0	2.53868
																						Earendil	20210719_AHS1_WT	Earendil_a::2	WT::OP50::20::heat_stress	a::2	2	a	3.29844	5.73438	1.98438	1.9875	WT		OP50			20	32		heat_stress				0	1		0	1.47618
																						Earendil	20210719_AHS1_WT	Earendil_a::2	WT::OP50::20::heat_stress	a::2	2	a	3.29844	5.73438	1.98438	1.9875	WT		OP50			20	32		heat_stress				0	1		0	2.49701
																						Earendil	20210719_AHS1_WT	Earendil_a::2	WT::OP50::20::heat_stress	a::2	2	a	3.29844	5.73438	1.98438	1.9875	WT		OP50			20	32		heat_stress				0	1		0	1.53868
																						Earendil	20210719_AHS1_WT	Earendil_a::2	WT::OP50::20::heat_stress	a::2	2	a	3.29844	5.73438	1.98438	1.9875	WT		OP50			20	32		heat_stress				0	1		0	1.47618
																						Earendil	20210719_AHS1_WT	Earendil_a::2	WT::OP50::20::heat_stress	a::2	2	a	3.29844	5.73438	1.98438	1.9875	WT		OP50			20	32		heat_stress				0	1		0	1.47618
																						Earendil	20210719_AHS1_WT	Earendil_a::2	WT::OP50::20::heat_stress	a::2	2	a	3.29844	5.73438	1.98438	1.9875	WT		OP50			20	32		heat_stress				0	1		0	1.47618
																						Earendil	20210719_AHS1_WT	Earendil_a::2	WT::OP50::20::heat_stress	a::2	2	a	3.29844	5.73438	1.98438	1.9875	WT		OP50			20	32		heat_stress				0	1		0	1.66368
																						Earendil	20210719_AHS1_WT	Earendil_a::2	WT::OP50::20::heat_stress	a::2	2	a	3.29844	5.73438	1.98438	1.9875	WT		OP50			20	32		heat_stress				0	1		0	2.20535
																						Earendil	20210719_AHS1_WT	Earendil_a::2	WT::OP50::20::heat_stress	a::2	2	a	3.29844	5.73438	1.98438	1.9875	WT		OP50			20	32		heat_stress				0	1		0	2.28868
																						Earendil	20210719_AHS1_WT	Earendil_a::2	WT::OP50::20::heat_stress	a::2	2	a	3.29844	5.73438	1.98438	1.9875	WT		OP50			20	32		heat_stress				0	1		0	1.47618
																						Earendil	20210719_AHS1_WT	Earendil_a::2	WT::OP50::20::heat_stress	a::2	2	a	3.29844	5.73438	1.98438	1.9875	WT		OP50			20	32		heat_stress				0	1		0	1.62201
																						Earendil	20210719_AHS1_WT	Earendil_a::2	WT::OP50::20::heat_stress	a::2	2	a	3.29844	5.73438	1.98438	1.9875	WT		OP50			20	32		heat_stress				0	1		0	1.49701
																						Earendil	20210719_AHS1_WT	Earendil_a::2	WT::OP50::20::heat_stress	a::2	2	a	3.29844	5.73438	1.98438	1.9875	WT		OP50			20	32		heat_stress				0	1	Extra worm from multiple-worm disambiguation	0	1.53868
																						Earendil	20210719_AHS1_WT	Earendil_a::2	WT::OP50::20::heat_stress	a::2	2	a	3.29844	5.73438	1.98438	1.9875	WT		OP50			20	32		heat_stress				0	1		0	1.47618
																						Earendil	20210719_AHS1_WT	Earendil_a::2	WT::OP50::20::heat_stress	a::2	2	a	3.29844	5.73438	1.98438	1.9875	WT		OP50			20	32		heat_stress				0	1		0	1.47618
																						Earendil	20210719_AHS1_WT	Earendil_a::2	WT::OP50::20::heat_stress	a::2	2	a	3.29844	5.73438	1.98438	1.9875	WT		OP50			20	32		heat_stress				0	1		0	1.70535
																						Earendil	20210719_AHS1_WT	Earendil_a::2	WT::OP50::20::heat_stress	a::2	2	a	3.29844	5.73438	1.98438	1.9875	WT		OP50			20	32		heat_stress				0	1		0	1.70535
																						Earendil	20210719_AHS1_WT	Earendil_a::2	WT::OP50::20::heat_stress	a::2	2	a	3.29844	5.73438	1.98438	1.9875	WT		OP50			20	32		heat_stress				0	1		0	1.53868
																						Earendil	20210719_AHS1_WT	Earendil_a::2	WT::OP50::20::heat_stress	a::2	2	a	3.29844	5.73438	1.98438	1.9875	WT		OP50			20	32		heat_stress				0	1		0	1.47618
																						Earendil	20210719_AHS1_WT	Earendil_a::2	WT::OP50::20::heat_stress	a::2	2	a	3.29844	5.73438	1.98438	1.9875	WT		OP50			20	32		heat_stress				0	1		0	1.53868
																						Earendil	20210719_AHS1_WT	Earendil_a::2	WT::OP50::20::heat_stress	a::2	2	a	3.29844	5.73438	1.98438	1.9875	WT		OP50			20	32		heat_stress				0	1		0	1.47618
																						Earendil	20210719_AHS1_WT	Earendil_a::2	WT::OP50::20::heat_stress	a::2	2	a	3.29844	5.73438	1.98438	1.9875	WT		OP50			20	32		heat_stress				0	1		0	1.49701
																						Earendil	20210719_AHS1_WT	Earendil_a::2	WT::OP50::20::heat_stress	a::2	2	a	3.29844	5.73438	1.98438	1.9875	WT		OP50			20	32		heat_stress				0	0		0	2.20535
																						Earendil	20210719_AHS1_WT	Earendil_a::2	WT::OP50::20::heat_stress	a::2	2	a	3.29844	5.73438	1.98438	1.9875	WT		OP50			20	32		heat_stress				0	0		0	1.47618
																						Earendil	20210719_AHS1_WT	Earendil_a::2	WT::OP50::20::heat_stress	a::2	2	a	3.29844	5.73438	1.98438	1.9875	WT		OP50			20	32		heat_stress				0	1		0	1.47618
																						Earendil	20210719_AHS1_WT	Earendil_a::2	WT::OP50::20::heat_stress	a::2	2	a	3.29844	5.73438	1.98438	1.9875	WT		OP50			20	32		heat_stress				0	1		0	1.53868
																						Earendil	20210719_AHS1_WT	Earendil_a::2	WT::OP50::20::heat_stress	a::2	2	a	3.29844	5.73438	1.98438	1.9875	WT		OP50			20	32		heat_stress				0	1		0	1.47618
																						Earendil	20210719_AHS1_WT	Earendil_a::2	WT::OP50::20::heat_stress	a::2	2	a	3.29844	5.73438	1.98438	1.9875	WT		OP50			20	32		heat_stress				0	1		0	1.53868
																						Earendil	20210719_AHS1_WT	Earendil_a::2	WT::OP50::20::heat_stress	a::2	2	a	3.29844	5.73438	1.98438	1.9875	WT		OP50			20	32		heat_stress				0	1		0	1.58035
																						Earendil	20210719_AHS1_WT	Earendil_a::2	WT::OP50::20::heat_stress	a::2	2	a	3.29844	5.73438	1.98438	1.9875	WT		OP50			20	32		heat_stress				0	1		0	1.47618
																						Earendil	20210719_AHS1_WT	Earendil_a::2	WT::OP50::20::heat_stress	a::2	2	a	3.29844	5.73438	1.98438	1.9875	WT		OP50			20	32		heat_stress				0	1		0	1.99701
																						Earendil	20210719_AHS1_WT	Earendil_a::2	WT::OP50::20::heat_stress	a::2	2	a	3.29844	5.73438	1.98438	1.9875	WT		OP50			20	32		heat_stress				0	1		0	1.47618
																						Earendil	20210719_AHS1_WT	Earendil_a::2	WT::OP50::20::heat_stress	a::2	2	a	3.29844	5.73438	1.98438	1.9875	WT		OP50			20	32		heat_stress				0	1		0	1.91368
																						Earendil	20210719_AHS1_WT	Earendil_a::2	WT::OP50::20::heat_stress	a::2	2	a	3.29844	5.73438	1.98438	1.9875	WT		OP50			20	32		heat_stress				0	1		0	1.91368
																						Earendil	20210719_AHS1_WT	Earendil_a::2	WT::OP50::20::heat_stress	a::2	2	a	3.29844	5.73438	1.98438	1.9875	WT		OP50			20	32		heat_stress				0	1		0	1.49701
																						Earendil	20210719_AHS1_WT	Earendil_a::2	WT::OP50::20::heat_stress	a::2	2	a	3.29844	5.73438	1.98438	1.9875	WT		OP50			20	32		heat_stress				0	1		0	1.47618
																						Earendil	20210719_AHS1_WT	Earendil_a::2	WT::OP50::20::heat_stress	a::2	2	a	3.29844	5.73438	1.98438	1.9875	WT		OP50			20	32		heat_stress				0	1		0	1.53868
																						Earendil	20210719_AHS1_WT	Earendil_a::2	WT::OP50::20::heat_stress	a::2	2	a	3.29844	5.73438	1.98438	1.9875	WT		OP50			20	32		heat_stress				0	1		0	1.62201
																						Earendil	20210719_AHS1_WT	Earendil_a::2	WT::OP50::20::heat_stress	a::2	2	a	3.29844	5.73438	1.98438	1.9875	WT		OP50			20	32		heat_stress				0	1		0	1.47618
																						Earendil	20210719_AHS1_WT	Earendil_a::2	WT::OP50::20::heat_stress	a::2	2	a	3.29844	5.73438	1.98438	1.9875	WT		OP50			20	32		heat_stress				0	1		0	1.49701
																						Earendil	20210719_AHS1_WT	Earendil_a::2	WT::OP50::20::heat_stress	a::2	2	a	3.29844	5.73438	1.98438	1.9875	WT		OP50			20	32		heat_stress				0	1		0	1.47618
																						Earendil	20210719_AHS1_WT	Earendil_a::2	WT::OP50::20::heat_stress	a::2	2	a	3.29844	5.73438	1.98438	1.9875	WT		OP50			20	32		heat_stress				0	1		0	1.62201
																						Earendil	20210719_AHS1_WT	Earendil_a::2	WT::OP50::20::heat_stress	a::2	2	a	3.29844	5.73438	1.98438	1.9875	WT		OP50			20	32		heat_stress				0	1		0	1.47618
																						Earendil	20210719_AHS1_WT	Earendil_a::2	WT::OP50::20::heat_stress	a::2	2	a	3.29844	5.73438	1.98438	1.9875	WT		OP50			20	32		heat_stress				0	1		0	1.47618
																						Earendil	20210719_AHS1_WT	Earendil_a::2	WT::OP50::20::heat_stress	a::2	2	a	3.29844	5.73438	1.98438	1.9875	WT		OP50			20	32		heat_stress				0	1		0	1.47618
																						Earendil	20210719_AHS1_WT	Earendil_a::2	WT::OP50::20::heat_stress	a::2	2	a	3.29844	5.73438	1.98438	1.9875	WT		OP50			20	32		heat_stress				0	1		0	1.49701
																						Earendil	20210719_AHS1_WT	Earendil_a::2	WT::OP50::20::heat_stress	a::2	2	a	3.29844	5.73438	1.98438	1.9875	WT		OP50			20	32		heat_stress				0	1		0	1.47618
																						Earendil	20210719_AHS1_WT	Earendil_a::2	WT::OP50::20::heat_stress	a::2	2	a	3.29844	5.73438	1.98438	1.9875	WT		OP50			20	32		heat_stress				0	1		0	1.49701
																						Earendil	20210719_AHS1_WT	Earendil_a::2	WT::OP50::20::heat_stress	a::2	2	a	3.29844	5.73438	1.98438	1.9875	WT		OP50			20	32		heat_stress				0	1		0	1.47618
																						Earendil	20210719_AHS1_WT	Earendil_a::2	WT::OP50::20::heat_stress	a::2	2	a	3.29844	5.73438	1.98438	1.9875	WT		OP50			20	32		heat_stress				0	1		0	1.53868
																						Earendil	20210719_AHS1_WT	Earendil_a::2	WT::OP50::20::heat_stress	a::2	2	a	3.29844	5.73438	1.98438	1.9875	WT		OP50			20	32		heat_stress				0	1		0	1.47618
																						Earendil	20210719_AHS1_WT	Earendil_a::2	WT::OP50::20::heat_stress	a::2	2	a	3.29844	5.73438	1.98438	1.9875	WT		OP50			20	32		heat_stress				0	1		0	1.58035
																						Earendil	20210719_AHS1_WT	Earendil_a::2	WT::OP50::20::heat_stress	a::2	2	a	3.29844	5.73438	1.98438	1.9875	WT		OP50			20	32		heat_stress				0	1		0	1.47618
																						Earendil	20210719_AHS1_WT	Earendil_a::2	WT::OP50::20::heat_stress	a::2	2	a	3.29844	5.73438	1.98438	1.9875	WT		OP50			20	32		heat_stress				0	1		0	1.49701
																						Earendil	20210719_AHS1_WT	Earendil_a::2	WT::OP50::20::heat_stress	a::2	2	a	3.29844	5.73438	1.98438	1.9875	WT		OP50			20	32		heat_stress				0	1		0	1.62201
																						Earendil	20210719_AHS1_WT	Earendil_a::2	WT::OP50::20::heat_stress	a::2	2	a	3.29844	5.73438	1.98438	1.9875	WT		OP50			20	32		heat_stress				0	1		0	1.47618
																						Earendil	20210719_AHS1_WT	Earendil_a::2	WT::OP50::20::heat_stress	a::2	2	a	3.29844	5.73438	1.98438	1.9875	WT		OP50			20	32		heat_stress				0	1		0	1.47618
																						Earendil	20210719_AHS1_WT	Earendil_a::2	WT::OP50::20::heat_stress	a::2	2	a	3.29844	5.73438	1.98438	1.9875	WT		OP50			20	32		heat_stress				0	1		0	1.47618
																						Earendil	20210719_AHS1_WT	Earendil_a::2	WT::OP50::20::heat_stress	a::2	2	a	3.29844	5.73438	1.98438	1.9875	WT		OP50			20	32		heat_stress				0	1		0	1.47618
																						Earendil	20210719_AHS1_WT	Earendil_a::2	WT::OP50::20::heat_stress	a::2	2	a	3.29844	5.73438	1.98438	1.9875	WT		OP50			20	32		heat_stress				0	1		0	1.47618
																						Earendil	20210719_AHS1_WT	Earendil_a::2	WT::OP50::20::heat_stress	a::2	2	a	3.29844	5.73438	1.98438	1.9875	WT		OP50			20	32		heat_stress				0	0		0	1.47618
																						Earendil	20210719_AHS1_WT	Earendil_a::2	WT::OP50::20::heat_stress	a::2	2	a	3.29844	5.73438	1.98438	1.9875	WT		OP50			20	32		heat_stress				0	0		0	1.47618
																						Earendil	20210719_AHS1_WT	Earendil_a::2	WT::OP50::20::heat_stress	a::2	2	a	3.29844	5.73438	1.98438	1.9875	WT		OP50			20	32		heat_stress				0	0		0	1.47618
																						Earendil	20210719_AHS1_WT	Earendil_a::2	WT::OP50::20::heat_stress	a::2	2	a	3.29844	5.73438	1.98438	1.9875	WT		OP50			20	32		heat_stress				0	1		0	1.47618
																						Earendil	20210719_AHS1_WT	Earendil_a::2	WT::OP50::20::heat_stress	a::2	2	a	3.29844	5.73438	1.98438	1.9875	WT		OP50			20	32		heat_stress				0	1		0	1.49701
																						Earendil	20210719_AHS1_WT	Earendil_a::2	WT::OP50::20::heat_stress	a::2	2	a	3.29844	5.73438	1.98438	1.9875	WT		OP50			20	32		heat_stress				0	1		0	1.47618
																						Earendil	20210719_AHS1_WT	Earendil_a::2	WT::OP50::20::heat_stress	a::2	2	a	3.29844	5.73438	1.98438	1.9875	WT		OP50			20	32		heat_stress				0	1		0	1.47618
																						Earendil	20210719_AHS1_WT	Earendil_a::2	WT::OP50::20::heat_stress	a::2	2	a	3.29844	5.73438	1.98438	1.9875	WT		OP50			20	32		heat_stress				0	0		0	1.47618
																						Earendil	20210719_AHS1_WT	Earendil_a::2	WT::OP50::20::heat_stress	a::2	2	a	3.29844	5.73438	1.98438	1.9875	WT		OP50			20	32		heat_stress				0	1		0	1.47618
																						Earendil	20210719_AHS1_WT	Earendil_a::2	WT::OP50::20::heat_stress	a::2	2	a	3.29844	5.73438	1.98438	1.9875	WT		OP50			20	32		heat_stress				0	1		0	1.47618
																						Earendil	20210719_AHS1_WT	Earendil_a::2	WT::OP50::20::heat_stress	a::2	2	a	3.29844	5.73438	1.98438	1.9875	WT		OP50			20	32		heat_stress				0	1		0	1.47618
																						Earendil	20210719_AHS1_WT	Earendil_a::2	WT::OP50::20::heat_stress	a::2	2	a	3.29844	5.73438	1.98438	1.9875	WT		OP50			20	32		heat_stress				0	1		0	1.47618
																						Earendil	20210719_AHS1_WT	Earendil_a::2	WT::OP50::20::heat_stress	a::2	2	a	3.29844	5.73438	1.98438	1.9875	WT		OP50			20	32		heat_stress				0	1		0	1.47618
																						Earendil	20210719_AHS1_WT	Earendil_a::2	WT::OP50::20::heat_stress	a::2	2	a	3.29844	5.73438	1.98438	1.9875	WT		OP50			20	32		heat_stress				0	1		0	1.47618
																						Earendil	20210719_AHS1_WT	Earendil_a::2	WT::OP50::20::heat_stress	a::2	2	a	3.29844	5.73438	1.98438	1.9875	WT		OP50			20	32		heat_stress				0	1		0	1.47618
																						Earendil	20210719_AHS1_WT	Earendil_a::2	WT::OP50::20::heat_stress	a::2	2	a	3.29844	5.73438	1.98438	1.9875	WT		OP50			20	32		heat_stress				0	1		0	1.47618
																						Earendil	20210719_AHS1_WT	Earendil_a::2	WT::OP50::20::heat_stress	a::2	2	a	3.29844	5.73438	1.98438	1.9875	WT		OP50			20	32		heat_stress				0	1		0	1.47618
																						Earendil	20210719_AHS1_WT	Earendil_a::2	WT::OP50::20::heat_stress	a::2	2	a	3.29844	5.73438	1.98438	1.9875	WT		OP50			20	32		heat_stress				0	1		0	1.47618
																						Earendil	20210719_AHS1_WT	Earendil_a::2	WT::OP50::20::heat_stress	a::2	2	a	3.29844	5.73438	1.98438	1.9875	WT		OP50			20	32		heat_stress				0	1		0	1.47618
																						Earendil	20210719_AHS1_WT	Earendil_a::2	WT::OP50::20::heat_stress	a::2	2	a	3.29844	5.73438	1.98438	1.9875	WT		OP50			20	32		heat_stress				0	1		0	1.47618
																						Earendil	20210719_AHS1_WT	Earendil_a::2	WT::OP50::20::heat_stress	a::2	2	a	3.29844	5.73438	1.98438	1.9875	WT		OP50			20	32		heat_stress				0	1		0	1.47618
																						Earendil	20210719_AHS1_WT	Earendil_a::2	WT::OP50::20::heat_stress	a::2	2	a	3.29844	5.73438	1.98438	1.9875	WT		OP50			20	32		heat_stress				0	1		0	1.47618
																						Earendil	20210719_AHS1_WT	Earendil_a::2	WT::OP50::20::heat_stress	a::2	2	a	3.29844	5.73438	1.98438	1.9875	WT		OP50			20	32		heat_stress				0	1		0	1.47618
																						Earendil	20210719_AHS1_WT	Earendil_a::2	WT::OP50::20::heat_stress	a::2	2	a	3.29844	5.73438	1.98438	1.9875	WT		OP50			20	32		heat_stress				0	1		0	1.47618
																						Earendil	20210719_AHS1_WT	Earendil_a::2	WT::OP50::20::heat_stress	a::2	2	a	3.29844	5.73438	1.98438	1.9875	WT		OP50			20	32		heat_stress				0	1		0	1.47618
																						Earendil	20210719_AHS1_WT	Earendil_a::2	WT::OP50::20::heat_stress	a::2	2	a	3.29844	5.73438	1.98438	1.9875	WT		OP50			20	32		heat_stress				0	1		0	1.47618
																						Earendil	20210719_AHS1_WT	Earendil_a::2	WT::OP50::20::heat_stress	a::2	2	a	3.29844	5.73438	1.98438	1.9875	WT		OP50			20	32		heat_stress				0	0		0	1.47618
																						Earendil	20210719_AHS1_WT	Earendil_a::2	WT::OP50::20::heat_stress	a::2	2	a	3.29844	5.73438	1.98438	1.9875	WT		OP50			20	32		heat_stress				0	0		0	1.47618
																						Earendil	20210719_AHS1_WT	Earendil_a::2	WT::OP50::20::heat_stress	a::2	2	a	3.29844	5.73438	1.98438	1.9875	WT		OP50			20	32		heat_stress				0	0		0	1.47618
																						Earendil	20210719_AHS1_WT	Earendil_a::2	WT::OP50::20::heat_stress	a::2	2	a	3.29844	5.73438	1.98438	1.9875	WT		OP50			20	32		heat_stress				0	0		0	1.47618
																						Earendil	20210719_AHS1_WT	Earendil_a::2	WT::OP50::20::heat_stress	a::2	2	a	3.29844	5.73438	1.98438	1.9875	WT		OP50			20	32		heat_stress				0	1		0	1.47618
																						Earendil	20210719_AHS1_WT	Earendil_a::2	WT::OP50::20::heat_stress	a::2	2	a	3.29844	5.73438	1.98438	1.9875	WT		OP50			20	32		heat_stress				0	1		0	1.47618
																						Earendil	20210719_AHS1_WT	Earendil_a::2	WT::OP50::20::heat_stress	a::2	2	a	3.29844	5.73438	1.98438	1.9875	WT		OP50			20	32		heat_stress				0	1		0	1.47618
																						Earendil	20210719_AHS1_WT	Earendil_a::2	WT::OP50::20::heat_stress	a::2	2	a	3.29844	5.73438	1.98438	1.9875	WT		OP50			20	32		heat_stress				0	0		0	1.47618
																						Earendil	20210719_AHS1_WT	Earendil_a::2	WT::OP50::20::heat_stress	a::2	2	a	3.29844	5.73438	1.98438	1.9875	WT		OP50			20	32		heat_stress				0	0		0	1.47618
																						Earendil	20210719_AHS1_WT	Earendil_a::2	WT::OP50::20::heat_stress	a::2	2	a	3.29844	5.73438	1.98438	1.9875	WT		OP50			20	32		heat_stress				0	0		0	1.47618
																						Earendil	20210719_AHS1_WT	Earendil_a::2	WT::OP50::20::heat_stress	a::2	2	a	3.29844	5.73438	1.98438	1.9875	WT		OP50			20	32		heat_stress				0	1		0	1.47618
																						Earendil	20210719_AHS1_WT	Earendil_a::2	WT::OP50::20::heat_stress	a::2	2	a	3.29844	5.73438	1.98438	1.9875	WT		OP50			20	32		heat_stress				0	1		0	1.47618
																						Earendil	20210719_AHS1_WT	Earendil_a::2	WT::OP50::20::heat_stress	a::2	2	a	3.29844	5.73438	1.98438	1.9875	WT		OP50			20	32		heat_stress				0	1		0	1.47618
																						Earendil	20210719_AHS1_WT	Earendil_a::2	WT::OP50::20::heat_stress	a::2	2	a	3.29844	5.73438	1.98438	1.9875	WT		OP50			20	32		heat_stress				0	1		0	1.47618
																						Earendil	20210719_AHS1_WT	Earendil_a::2	WT::OP50::20::heat_stress	a::2	2	a	3.29844	5.73438	1.98438	1.9875	WT		OP50			20	32		heat_stress				0	1		0	1.47618
																						Earendil	20210719_AHS1_WT	Earendil_a::2	WT::OP50::20::heat_stress	a::2	2	a	3.29844	5.73438	1.98438	1.9875	WT		OP50			20	32		heat_stress				0	0		0	1.47618
																						Earendil	20210719_AHS1_WT	Earendil_a::2	WT::OP50::20::heat_stress	a::2	2	a	3.29844	5.73438	1.98438	1.9875	WT		OP50			20	32		heat_stress				0	1		0	1.47618
																						Earendil	20210719_AHS1_WT	Earendil_a::2	WT::OP50::20::heat_stress	a::2	2	a	3.29844	5.73438	1.98438	1.9875	WT		OP50			20	32		heat_stress				0	0		0	1.47618
																						Earendil	20210719_AHS1_WT	Earendil_a::2	WT::OP50::20::heat_stress	a::2	2	a	3.29844	5.73438	1.98438	1.9875	WT		OP50			20	32		heat_stress				0	0		0	1.47618
																						Earendil	20210719_AHS1_WT	Earendil_a::2	WT::OP50::20::heat_stress	a::2	2	a	3.29844	5.73438	1.98438	1.9875	WT		OP50			20	32		heat_stress				0	1		0	1.47618
																						Earendil	20210719_AHS1_WT	Earendil_a::2	WT::OP50::20::heat_stress	a::2	2	a	3.29844	5.73438	1.98438	1.9875	WT		OP50			20	32		heat_stress				0	1		0	1.47618
																						Earendil	20210719_AHS1_WT	Earendil_a::2	WT::OP50::20::heat_stress	a::2	2	a	3.29844	5.73438	1.98438	1.9875	WT		OP50			20	32		heat_stress				0	1		0	1.49701
																						Earendil	20210719_AHS1_WT	Earendil_a::2	WT::OP50::20::heat_stress	a::2	2	a	3.29844	5.73438	1.98438	1.9875	WT		OP50			20	32		heat_stress				0	1		0	1.47618
																						Earendil	20210719_AHS1_WT	Earendil_a::2	WT::OP50::20::heat_stress	a::2	2	a	3.29844	5.73438	1.98438	1.9875	WT		OP50			20	32		heat_stress				0	1		0	1.47618
																						Earendil	20210719_AHS1_WT	Earendil_a::2	WT::OP50::20::heat_stress	a::2	2	a	3.29844	5.73438	1.98438	1.9875	WT		OP50			20	32		heat_stress				0	1		0	1.47618
																						Earendil	20210719_AHS1_WT	Earendil_a::2	WT::OP50::20::heat_stress	a::2	2	a	3.29844	5.73438	1.98438	1.9875	WT		OP50			20	32		heat_stress				0	1		0	1.47618
																						Earendil	20210719_AHS1_WT	Earendil_a::2	WT::OP50::20::heat_stress	a::2	2	a	3.29844	5.73438	1.98438	1.9875	WT		OP50			20	32		heat_stress				0	0		0	1.47618
																						Earendil	20210719_AHS1_WT	Earendil_a::2	WT::OP50::20::heat_stress	a::2	2	a	3.29844	5.73438	1.98438	1.9875	WT		OP50			20	32		heat_stress				0	1		0	1.47618
																						Earendil	20210719_AHS1_WT	Earendil_a::2	WT::OP50::20::heat_stress	a::2	2	a	3.29844	5.73438	1.98438	1.9875	WT		OP50			20	32		heat_stress				0	1		0	1.47618
																						Earendil	20210719_AHS1_WT	Earendil_a::2	WT::OP50::20::heat_stress	a::2	2	a	3.29844	5.73438	1.98438	1.9875	WT		OP50			20	32		heat_stress				0	0		0	1.47618
																						Earendil	20210719_AHS1_WT	Earendil_a::2	WT::OP50::20::heat_stress	a::2	2	a	3.29844	5.73438	1.98438	1.9875	WT		OP50			20	32		heat_stress				0	1		0	1.47618
																						Earendil	20210719_AHS1_WT	Earendil_a::2	WT::OP50::20::heat_stress	a::2	2	a	3.29844	5.73438	1.98438	1.9875	WT		OP50			20	32		heat_stress				0	0		0	1.47618
																						Earendil	20210719_AHS1_WT	Earendil_a::2	WT::OP50::20::heat_stress	a::2	2	a	3.29844	5.73438	1.98438	1.9875	WT		OP50			20	32		heat_stress				0	1		0	1.47618
																						Earendil	20210719_AHS1_WT	Earendil_a::2	WT::OP50::20::heat_stress	a::2	2	a	3.29844	5.73438	1.98438	1.9875	WT		OP50			20	32		heat_stress				0	1		0	1.47618
																						Earendil	20210719_AHS1_WT	Earendil_a::2	WT::OP50::20::heat_stress	a::2	2	a	3.29844	5.73438	1.98438	1.9875	WT		OP50			20	32		heat_stress				0	0		0	1.47618
																						Earendil	20210719_AHS1_WT	Earendil_a::2	WT::OP50::20::heat_stress	a::2	2	a	3.29844	5.73438	1.98438	1.9875	WT		OP50			20	32		heat_stress				0	1		0	1.47618
																						Earendil	20210719_AHS1_WT	Earendil_a::2	WT::OP50::20::heat_stress	a::2	2	a	3.29844	5.73438	1.98438	1.9875	WT		OP50			20	32		heat_stress				0	0		0	1.47618
																						Earendil	20210719_AHS1_WT	Earendil_a::2	WT::OP50::20::heat_stress	a::2	2	a	3.29844	5.73438	1.98438	1.9875	WT		OP50			20	32		heat_stress				0	0		0	1.47618
																						Earendil	20210719_AHS1_WT	Earendil_a::2	WT::OP50::20::heat_stress	a::2	2	a	3.29844	5.73438	1.98438	1.9875	WT		OP50			20	32		heat_stress				0	1		0	1.47618
																						Earendil	20210719_AHS1_WT	Earendil_a::2	WT::OP50::20::heat_stress	a::2	2	a	3.29844	5.73438	1.98438	1.9875	WT		OP50			20	32		heat_stress				0	0		0	1.47618
																						Earendil	20210719_AHS1_WT	Earendil_a::2	WT::OP50::20::heat_stress	a::2	2	a	3.29844	5.73438	1.98438	1.9875	WT		OP50			20	32		heat_stress				0	1		0	1.47618
																						Earendil	20210719_AHS1_WT	Earendil_a::2	WT::OP50::20::heat_stress	a::2	2	a	3.29844	5.73438	1.98438	1.9875	WT		OP50			20	32		heat_stress				0	0		0	1.47618
																						Earendil	20210719_AHS1_WT	Earendil_a::2	WT::OP50::20::heat_stress	a::2	2	a	3.29844	5.73438	1.98438	1.9875	WT		OP50			20	32		heat_stress				0	1		0	1.47618
																						Earendil	20210719_AHS1_WT	Earendil_a::2	WT::OP50::20::heat_stress	a::2	2	a	3.29844	5.73438	1.98438	1.9875	WT		OP50			20	32		heat_stress				0	1		0	1.47618
																						Earendil	20210719_AHS1_WT	Earendil_a::2	WT::OP50::20::heat_stress	a::2	2	a	3.29844	5.73438	1.98438	1.9875	WT		OP50			20	32		heat_stress				0	0		0	1.47618
																						Earendil	20210719_AHS1_WT	Earendil_a::2	WT::OP50::20::heat_stress	a::2	2	a	3.29844	5.73438	1.98438	1.9875	WT		OP50			20	32		heat_stress				0	1		0	1.47618
																						Earendil	20210719_AHS1_WT	Earendil_a::2	WT::OP50::20::heat_stress	a::2	2	a	3.29844	5.73438	1.98438	1.9875	WT		OP50			20	32		heat_stress				0	1		0	1.47618
																						Earendil	20210719_AHS1_WT	Earendil_a::2	WT::OP50::20::heat_stress	a::2	2	a	3.29844	5.73438	1.98438	1.9875	WT		OP50			20	32		heat_stress				0	1		0	1.47618
																						Earendil	20210719_AHS1_WT	Earendil_a::2	WT::OP50::20::heat_stress	a::2	2	a	3.29844	5.73438	1.98438	1.9875	WT		OP50			20	32		heat_stress				0	1		0	1.47618
																						Earendil	20210719_AHS1_WT	Earendil_a::2	WT::OP50::20::heat_stress	a::2	2	a	3.29844	5.73438	1.98438	1.9875	WT		OP50			20	32		heat_stress				0	1		0	1.47618
																						Earendil	20210719_AHS1_WT	Earendil_a::2	WT::OP50::20::heat_stress	a::2	2	a	3.29844	5.73438	1.98438	1.9875	WT		OP50			20	32		heat_stress				0	1		0	1.47618
																						Earendil	20210719_AHS1_WT	Earendil_a::2	WT::OP50::20::heat_stress	a::2	2	a	3.29844	5.73438	1.98438	1.9875	WT		OP50			20	32		heat_stress				0	1		0	1.47618
																						Earendil	20210719_AHS1_WT	Earendil_a::2	WT::OP50::20::heat_stress	a::2	2	a	3.29844	5.73438	1.98438	1.9875	WT		OP50			20	32		heat_stress				0	1		0	1.47618
																						Earendil	20210719_AHS1_WT	Earendil_a::2	WT::OP50::20::heat_stress	a::2	2	a	3.29844	5.73438	1.98438	1.9875	WT		OP50			20	32		heat_stress				0	1		0	1.47618
																						Earendil	20210719_AHS1_WT	Earendil_a::2	WT::OP50::20::heat_stress	a::2	2	a	3.29844	5.73438	1.98438	1.9875	WT		OP50			20	32		heat_stress				0	1		0	1.49701
																						Earendil	20210719_AHS1_WT	Earendil_a::2	WT::OP50::20::heat_stress	a::2	2	a	3.29844	5.73438	1.98438	1.9875	WT		OP50			20	32		heat_stress				0	0		0	1.47618
																						Earendil	20210719_AHS1_WT	Earendil_a::2	WT::OP50::20::heat_stress	a::2	2	a	3.29844	5.73438	1.98438	1.9875	WT		OP50			20	32		heat_stress				0	1		0	1.47618
																						Earendil	20210719_AHS1_WT	Earendil_a::2	WT::OP50::20::heat_stress	a::2	2	a	3.29844	5.73438	1.98438	1.9875	WT		OP50			20	32		heat_stress				0	1		0	1.47618
																						Earendil	20210719_AHS1_WT	Earendil_a::2	WT::OP50::20::heat_stress	a::2	2	a	3.29844	5.73438	1.98438	1.9875	WT		OP50			20	32		heat_stress				0	1		0	1.47618
																						Earendil	20210719_AHS1_WT	Earendil_a::2	WT::OP50::20::heat_stress	a::2	2	a	3.29844	5.73438	1.98438	1.9875	WT		OP50			20	32		heat_stress				0	1		0	1.47618
																						Earendil	20210719_AHS1_WT	Earendil_a::2	WT::OP50::20::heat_stress	a::2	2	a	3.29844	5.73438	1.98438	1.9875	WT		OP50			20	32		heat_stress				0	1		0	1.47618
																						Earendil	20210719_AHS1_WT	Earendil_a::2	WT::OP50::20::heat_stress	a::2	2	a	3.29844	5.73438	1.98438	1.9875	WT		OP50			20	32		heat_stress				0	1		0	1.49701
																						Earendil	20210719_AHS1_WT	Earendil_a::2	WT::OP50::20::heat_stress	a::2	2	a	3.29844	5.73438	1.98438	1.9875	WT		OP50			20	32		heat_stress				0	1		0	1.47618
																						Earendil	20210719_AHS1_WT	Earendil_a::2	WT::OP50::20::heat_stress	a::2	2	a	3.29844	5.73438	1.98438	1.9875	WT		OP50			20	32		heat_stress				0	1		0	1.47618
																						Earendil	20210719_AHS1_WT	Earendil_a::2	WT::OP50::20::heat_stress	a::2	2	a	3.29844	5.73438	1.98438	1.9875	WT		OP50			20	32		heat_stress				0	1		0	1.47618
																						Earendil	20210719_AHS1_WT	Earendil_a::2	WT::OP50::20::heat_stress	a::2	2	a	3.29844	5.73438	1.98438	1.9875	WT		OP50			20	32		heat_stress				0	1		0	1.47618
																						Earendil	20210719_AHS1_WT	Earendil_a::2	WT::OP50::20::heat_stress	a::2	2	a	3.29844	5.73438	1.98438	1.9875	WT		OP50			20	32		heat_stress				0	1		0	1.47618
																						Earendil	20210719_AHS1_WT	Earendil_a::2	WT::OP50::20::heat_stress	a::2	2	a	3.29844	5.73438	1.98438	1.9875	WT		OP50			20	32		heat_stress				0	1		0	1.47618
																						Earendil	20210719_AHS1_WT	Earendil_a::2	WT::OP50::20::heat_stress	a::2	2	a	3.29844	5.73438	1.98438	1.9875	WT		OP50			20	32		heat_stress				0	1		0	1.47618
																						Earendil	20210719_AHS1_WT	Earendil_a::2	WT::OP50::20::heat_stress	a::2	2	a	3.29844	5.73438	1.98438	1.9875	WT		OP50			20	32		heat_stress				0	1		0	1.47618
																						Earendil	20210719_AHS1_WT	Earendil_a::2	WT::OP50::20::heat_stress	a::2	2	a	3.29844	5.73438	1.98438	1.9875	WT		OP50			20	32		heat_stress				0	1		0	1.47618
																						Earendil	20210719_AHS1_WT	Earendil_a::2	WT::OP50::20::heat_stress	a::2	2	a	3.29844	5.73438	1.98438	1.9875	WT		OP50			20	32		heat_stress				0	1		0	1.49701
																						Earendil	20210719_AHS1_WT	Earendil_a::2	WT::OP50::20::heat_stress	a::2	2	a	3.29844	5.73438	1.98438	1.9875	WT		OP50			20	32		heat_stress				0	1		0	1.47618
																						Earendil	20210719_AHS1_WT	Earendil_a::2	WT::OP50::20::heat_stress	a::2	2	a	3.29844	5.73438	1.98438	1.9875	WT		OP50			20	32		heat_stress				0	1		0	1.47618
																						Earendil	20210719_AHS1_WT	Earendil_a::2	WT::OP50::20::heat_stress	a::2	2	a	3.29844	5.73438	1.98438	1.9875	WT		OP50			20	32		heat_stress				0	1		0	1.47618
																						Earendil	20210719_AHS1_WT	Earendil_a::2	WT::OP50::20::heat_stress	a::2	2	a	3.29844	5.73438	1.98438	1.9875	WT		OP50			20	32		heat_stress				0	1		0	1.47618
																						Earendil	20210719_AHS1_WT	Earendil_a::2	WT::OP50::20::heat_stress	a::2	2	a	3.29844	5.73438	1.98438	1.9875	WT		OP50			20	32		heat_stress				0	1		0	1.47618
																						Earendil	20210719_AHS1_WT	Earendil_a::2	WT::OP50::20::heat_stress	a::2	2	a	3.29844	5.73438	1.98438	1.9875	WT		OP50			20	32		heat_stress				0	1		0	1.47618
																						Earendil	20210719_AHS1_WT	Earendil_a::2	WT::OP50::20::heat_stress	a::2	2	a	3.29844	5.73438	1.98438	1.9875	WT		OP50			20	32		heat_stress				0	1		0	1.58035
																						Earendil	20210719_AHS1_WT	Earendil_a::2	WT::OP50::20::heat_stress	a::2	2	a	3.29844	5.73438	1.98438	1.9875	WT		OP50			20	32		heat_stress				0	1		0	1.47618
																						Earendil	20210719_AHS1_WT	Earendil_a::2	WT::OP50::20::heat_stress	a::2	2	a	3.29844	5.73438	1.98438	1.9875	WT		OP50			20	32		heat_stress				0	1		0	1.47618
																						Earendil	20210719_AHS1_WT	Earendil_a::2	WT::OP50::20::heat_stress	a::2	2	a	3.29844	5.73438	1.98438	1.9875	WT		OP50			20	32		heat_stress				0	1		0	1.47618
																						Earendil	20210719_AHS1_WT	Earendil_a::2	WT::OP50::20::heat_stress	a::2	2	a	3.29844	5.73438	1.98438	1.9875	WT		OP50			20	32		heat_stress				0	1		0	1.47618
																						Earendil	20210719_AHS1_WT	Earendil_a::2	WT::OP50::20::heat_stress	a::2	2	a	3.29844	5.73438	1.98438	1.9875	WT		OP50			20	32		heat_stress				0	1		0	1.47618
																						Earendil	20210719_AHS1_WT	Earendil_a::2	WT::OP50::20::heat_stress	a::2	2	a	3.29844	5.73438	1.98438	1.9875	WT		OP50			20	32		heat_stress				0	1		0	1.47618
																						Earendil	20210719_AHS1_WT	Earendil_a::2	WT::OP50::20::heat_stress	a::2	2	a	3.29844	5.73438	1.98438	1.9875	WT		OP50			20	32		heat_stress				0	1		0	1.47618
																						Earendil	20210719_AHS1_WT	Earendil_a::2	WT::OP50::20::heat_stress	a::2	2	a	3.29844	5.73438	1.98438	1.9875	WT		OP50			20	32		heat_stress				0	1		0	1.47618
																						Earendil	20210719_AHS1_WT	Earendil_a::2	WT::OP50::20::heat_stress	a::2	2	a	3.29844	5.73438	1.98438	1.9875	WT		OP50			20	32		heat_stress				0	1		0	1.47618
																						Earendil	20210719_AHS1_WT	Earendil_a::2	WT::OP50::20::heat_stress	a::2	2	a	3.29844	5.73438	1.98438	1.9875	WT		OP50			20	32		heat_stress				0	1		0	1.47618
																						Earendil	20210719_AHS1_WT	Earendil_a::2	WT::OP50::20::heat_stress	a::2	2	a	3.29844	5.73438	1.98438	1.9875	WT		OP50			20	32		heat_stress				0	1		0	1.47618
																						Earendil	20210719_AHS1_WT	Earendil_a::2	WT::OP50::20::heat_stress	a::2	2	a	3.29844	5.73438	1.98438	1.9875	WT		OP50			20	32		heat_stress				0	1		0	1.49701
																						Earendil	20210719_AHS1_WT	Earendil_a::2	WT::OP50::20::heat_stress	a::2	2	a	3.29844	5.73438	1.98438	1.9875	WT		OP50			20	32		heat_stress				0	1		0	1.47618
																						Earendil	20210719_AHS1_WT	Earendil_a::2	WT::OP50::20::heat_stress	a::2	2	a	3.29844	5.73438	1.98438	1.9875	WT		OP50			20	32		heat_stress				0	1		0	1.47618
																						Earendil	20210719_AHS1_WT	Earendil_a::2	WT::OP50::20::heat_stress	a::2	2	a	3.29844	5.73438	1.98438	1.9875	WT		OP50			20	32		heat_stress				0	1		0	1.47618
																						Earendil	20210719_AHS1_WT	Earendil_a::2	WT::OP50::20::heat_stress	a::2	2	a	3.29844	5.73438	1.98438	1.9875	WT		OP50			20	32		heat_stress				0	1		0	1.47618
																						Earendil	20210719_AHS1_WT	Earendil_a::2	WT::OP50::20::heat_stress	a::2	2	a	3.29844	5.73438	1.98438	1.9875	WT		OP50			20	32		heat_stress				0	1		0	1.47618
																						Earendil	20210719_AHS1_WT	Earendil_a::2	WT::OP50::20::heat_stress	a::2	2	a	3.29844	5.73438	1.98438	1.9875	WT		OP50			20	32		heat_stress				0	1		0	1.47618
																						Earendil	20210719_AHS1_WT	Earendil_a::2	WT::OP50::20::heat_stress	a::2	2	a	3.29844	5.73438	1.98438	1.9875	WT		OP50			20	32		heat_stress				0	1		0	1.47618
																						Earendil	20210719_AHS1_WT	Earendil_a::2	WT::OP50::20::heat_stress	a::2	2	a	3.29844	5.73438	1.98438	1.9875	WT		OP50			20	32		heat_stress				0	1		0	1.47618
																						Earendil	20210719_AHS1_WT	Earendil_a::2	WT::OP50::20::heat_stress	a::2	2	a	3.29844	5.73438	1.98438	1.9875	WT		OP50			20	32		heat_stress				0	1		0	1.47618
																						Earendil	20210719_AHS1_WT	Earendil_a::2	WT::OP50::20::heat_stress	a::2	2	a	3.29844	5.73438	1.98438	1.9875	WT		OP50			20	32		heat_stress				0	1		0	1.47618
																						Earendil	20210719_AHS1_WT	Earendil_a::2	WT::OP50::20::heat_stress	a::2	2	a	3.29844	5.73438	1.98438	1.9875	WT		OP50			20	32		heat_stress				0	1		0	1.47618
																						Earendil	20210719_AHS1_WT	Earendil_a::2	WT::OP50::20::heat_stress	a::2	2	a	3.29844	5.73438	1.98438	1.9875	WT		OP50			20	32		heat_stress				0	1		0	1.47618
																						Earendil	20210719_AHS1_WT	Earendil_a::2	WT::OP50::20::heat_stress	a::2	2	a	3.29844	5.73438	1.98438	1.9875	WT		OP50			20	32		heat_stress				0	1		0	1.49701
																						Earendil	20210719_AHS1_WT	Earendil_a::2	WT::OP50::20::heat_stress	a::2	2	a	3.29844	5.73438	1.98438	1.9875	WT		OP50			20	32		heat_stress				0	1		0	1.49701
																						Earendil	20210719_AHS1_WT	Earendil_a::2	WT::OP50::20::heat_stress	a::2	2	a	3.29844	5.73438	1.98438	1.9875	WT		OP50			20	32		heat_stress				0	1		0	1.49701
																						Earendil	20210719_AHS1_WT	Earendil_a::2	WT::OP50::20::heat_stress	a::2	2	a	3.29844	5.73438	1.98438	1.9875	WT		OP50			20	32		heat_stress				0	1		0	1.49701
																						Earendil	20210719_AHS1_WT	Earendil_a::2	WT::OP50::20::heat_stress	a::2	2	a	3.29844	5.73438	1.98438	1.9875	WT		OP50			20	32		heat_stress				0	1		0	1.58035
																						Earendil	20210719_AHS1_WT	Earendil_a::2	WT::OP50::20::heat_stress	a::2	2	a	3.29844	5.73438	1.98438	1.9875	WT		OP50			20	32		heat_stress				0	1		0	1.53868
																						Earendil	20210719_AHS1_WT	Earendil_a::2	WT::OP50::20::heat_stress	a::2	2	a	3.29844	5.73438	1.98438	1.9875	WT		OP50			20	32		heat_stress				0	1		0	1.49701
																						Earendil	20210719_AHS1_WT	Earendil_a::2	WT::OP50::20::heat_stress	a::2	2	a	3.29844	5.73438	1.98438	1.9875	WT		OP50			20	32		heat_stress				0	1		0	1.47618
																						Earendil	20210719_AHS1_WT	Earendil_a::2	WT::OP50::20::heat_stress	a::2	2	a	3.29844	5.73438	1.98438	1.9875	WT		OP50			20	32		heat_stress				0	1		0	1.47618
																						Earendil	20210719_AHS1_WT	Earendil_a::2	WT::OP50::20::heat_stress	a::2	2	a	3.29844	5.73438	1.98438	1.9875	WT		OP50			20	32		heat_stress				0	1		0	1.47618
																						Earendil	20210719_AHS1_WT	Earendil_a::2	WT::OP50::20::heat_stress	a::2	2	a	3.29844	5.73438	1.98438	1.9875	WT		OP50			20	32		heat_stress				0	1		0	1.66368
																						Earendil	20210719_AHS1_WT	Earendil_a::2	WT::OP50::20::heat_stress	a::2	2	a	3.29844	5.73438	1.98438	1.9875	WT		OP50			20	32		heat_stress				0	1		0	1.47618
																						Earendil	20210719_AHS1_WT	Earendil_a::2	WT::OP50::20::heat_stress	a::2	2	a	3.29844	5.73438	1.98438	1.9875	WT		OP50			20	32		heat_stress				0	1		0	1.47618
																						Earendil	20210719_AHS1_WT	Earendil_a::2	WT::OP50::20::heat_stress	a::2	2	a	3.29844	5.73438	1.98438	1.9875	WT		OP50			20	32		heat_stress				0	1		0	1.47618
																						Earendil	20210719_AHS1_WT	Earendil_a::2	WT::OP50::20::heat_stress	a::2	2	a	3.29844	5.73438	1.98438	1.9875	WT		OP50			20	32		heat_stress				0	1		0	1.47618
																						Earendil	20210719_AHS1_WT	Earendil_a::2	WT::OP50::20::heat_stress	a::2	2	a	3.29844	5.73438	1.98438	1.9875	WT		OP50			20	32		heat_stress				0	1		0	1.62201
																						Earendil	20210719_AHS1_WT	Earendil_a::2	WT::OP50::20::heat_stress	a::2	2	a	3.29844	5.73438	1.98438	1.9875	WT		OP50			20	32		heat_stress				0	1		0	1.53868
																						Earendil	20210719_AHS1_WT	Earendil_a::2	WT::OP50::20::heat_stress	a::2	2	a	3.29844	5.73438	1.98438	1.9875	WT		OP50			20	32		heat_stress				0	1		0	1.47618
																						Earendil	20210719_AHS1_WT	Earendil_a::2	WT::OP50::20::heat_stress	a::2	2	a	3.29844	5.73438	1.98438	1.9875	WT		OP50			20	32		heat_stress				0	1		0	1.70535
																						Earendil	20210719_AHS1_WT	Earendil_a::2	WT::OP50::20::heat_stress	a::2	2	a	3.29844	5.73438	1.98438	1.9875	WT		OP50			20	32		heat_stress				0	1		0	1.66368
																						Earendil	20210719_AHS1_WT	Earendil_a::2	WT::OP50::20::heat_stress	a::2	2	a	3.29844	5.73438	1.98438	1.9875	WT		OP50			20	32		heat_stress				0	1		0	1.47618
																						Earendil	20210719_AHS1_WT	Earendil_a::2	WT::OP50::20::heat_stress	a::2	2	a	3.29844	5.73438	1.98438	1.9875	WT		OP50			20	32		heat_stress				0	1		0	1.53868
																						Earendil	20210719_AHS1_WT	Earendil_a::2	WT::OP50::20::heat_stress	a::2	2	a	3.29844	5.73438	1.98438	1.9875	WT		OP50			20	32		heat_stress				0	1		0	1.70535
																						Earendil	20210719_AHS1_WT	Earendil_a::2	WT::OP50::20::heat_stress	a::2	2	a	3.29844	5.73438	1.98438	1.9875	WT		OP50			20	32		heat_stress				0	1		0	1.47618
																						Earendil	20210719_AHS1_WT	Earendil_a::2	WT::OP50::20::heat_stress	a::2	2	a	3.29844	5.73438	1.98438	1.9875	WT		OP50			20	32		heat_stress				0	1		0	1.47618
																						Earendil	20210719_AHS1_WT	Earendil_a::2	WT::OP50::20::heat_stress	a::2	2	a	3.29844	5.73438	1.98438	1.9875	WT		OP50			20	32		heat_stress				0	1		0	2.28868
																						Earendil	20210719_AHS1_WT	Earendil_a::2	WT::OP50::20::heat_stress	a::2	2	a	3.29844	5.73438	1.98438	1.9875	WT		OP50			20	32		heat_stress				0	1		0	1.70535
																						Earendil	20210719_AHS1_WT	Earendil_a::2	WT::OP50::20::heat_stress	a::2	2	a	3.29844	5.73438	1.98438	1.9875	WT		OP50			20	32		heat_stress				0	1		0	1.47618
																						Earendil	20210719_AHS1_WT	Earendil_a::2	WT::OP50::20::heat_stress	a::2	2	a	3.29844	5.73438	1.98438	1.9875	WT		OP50			20	32		heat_stress				0	1		0	1.49701
																						Earendil	20210719_AHS1_WT	Earendil_a::2	WT::OP50::20::heat_stress	a::2	2	a	3.29844	5.73438	1.98438	1.9875	WT		OP50			20	32		heat_stress				0	1		0	1.53868
																						Earendil	20210719_AHS1_WT	Earendil_a::2	WT::OP50::20::heat_stress	a::2	2	a	3.29844	5.73438	1.98438	1.9875	WT		OP50			20	32		heat_stress				0	1		0	1.66368
																						Earendil	20210719_AHS1_WT	Earendil_a::2	WT::OP50::20::heat_stress	a::2	2	a	3.29844	5.73438	1.98438	1.9875	WT		OP50			20	32		heat_stress				0	1		0	1.66368
																						Earendil	20210719_AHS1_WT	Earendil_a::2	WT::OP50::20::heat_stress	a::2	2	a	3.29844	5.73438	1.98438	1.9875	WT		OP50			20	32		heat_stress				0	1		0	1.49701
																						Earendil	20210719_AHS1_WT	Earendil_b::3	col9910X::OP50::20::heat_stress	b::3	3	b	5.27813	8.13438	1.9875	1.9875	col9910X		OP50			20	32		heat_stress				0	1		0	0.392847
																						Earendil	20210719_AHS1_WT	Earendil_b::3	col9910X::OP50::20::heat_stress	b::3	3	b	5.27813	8.13438	1.9875	1.9875	col9910X		OP50			20	32		heat_stress				0	1		0	-0.002986
																						Earendil	20210719_AHS1_WT	Earendil_b::3	col9910X::OP50::20::heat_stress	b::3	3	b	5.27813	8.13438	1.9875	1.9875	col9910X		OP50			20	32		heat_stress				0	1	Extra worm from multiple-worm disambiguation	0	1.05951
																						Earendil	20210719_AHS1_WT	Earendil_b::3	col9910X::OP50::20::heat_stress	b::3	3	b	5.27813	8.13438	1.9875	1.9875	col9910X		OP50			20	32		heat_stress				0	1		0	0.017847
																						Earendil	20210719_AHS1_WT	Earendil_b::3	col9910X::OP50::20::heat_stress	b::3	3	b	5.27813	8.13438	1.9875	1.9875	col9910X		OP50			20	32		heat_stress				0	1		0	-0.002986
																						Earendil	20210719_AHS1_WT	Earendil_b::3	col9910X::OP50::20::heat_stress	b::3	3	b	5.27813	8.13438	1.9875	1.9875	col9910X		OP50			20	32		heat_stress				0	0		0	0.226181
																						Earendil	20210719_AHS1_WT	Earendil_b::3	col9910X::OP50::20::heat_stress	b::3	3	b	5.27813	8.13438	1.9875	1.9875	col9910X		OP50			20	32		heat_stress				0	1		0	-0.002986
																						Earendil	20210719_AHS1_WT	Earendil_b::3	col9910X::OP50::20::heat_stress	b::3	3	b	5.27813	8.13438	1.9875	1.9875	col9910X		OP50			20	32		heat_stress				0	1		0	0.142847
																						Earendil	20210719_AHS1_WT	Earendil_b::3	col9910X::OP50::20::heat_stress	b::3	3	b	5.27813	8.13438	1.9875	1.9875	col9910X		OP50			20	32		heat_stress				0	1		0	0.101181
																						Earendil	20210719_AHS1_WT	Earendil_b::3	col9910X::OP50::20::heat_stress	b::3	3	b	5.27813	8.13438	1.9875	1.9875	col9910X		OP50			20	32		heat_stress				0	1		0	0.101181
																						Earendil	20210719_AHS1_WT	Earendil_b::3	col9910X::OP50::20::heat_stress	b::3	3	b	5.27813	8.13438	1.9875	1.9875	col9910X		OP50			20	32		heat_stress				0	1		0	0.226181
																						Earendil	20210719_AHS1_WT	Earendil_b::3	col9910X::OP50::20::heat_stress	b::3	3	b	5.27813	8.13438	1.9875	1.9875	col9910X		OP50			20	32		heat_stress				0	1		0	2.55951
																						Earendil	20210719_AHS1_WT	Earendil_b::3	col9910X::OP50::20::heat_stress	b::3	3	b	5.27813	8.13438	1.9875	1.9875	col9910X		OP50			20	32		heat_stress				0	1		0	-0.002986
																						Earendil	20210719_AHS1_WT	Earendil_b::3	col9910X::OP50::20::heat_stress	b::3	3	b	5.27813	8.13438	1.9875	1.9875	col9910X		OP50			20	32		heat_stress				0	1		0	0.559514
																						Earendil	20210719_AHS1_WT	Earendil_b::3	col9910X::OP50::20::heat_stress	b::3	3	b	5.27813	8.13438	1.9875	1.9875	col9910X		OP50			20	32		heat_stress				0	1	Extra worm from multiple-worm disambiguation	0	1.01785
																						Earendil	20210719_AHS1_WT	Earendil_b::3	col9910X::OP50::20::heat_stress	b::3	3	b	5.27813	8.13438	1.9875	1.9875	col9910X		OP50			20	32		heat_stress				0	1		0	-0.002986
																						Earendil	20210719_AHS1_WT	Earendil_b::3	col9910X::OP50::20::heat_stress	b::3	3	b	5.27813	8.13438	1.9875	1.9875	col9910X		OP50			20	32		heat_stress				0	1		0	0.059514
																						Earendil	20210719_AHS1_WT	Earendil_b::3	col9910X::OP50::20::heat_stress	b::3	3	b	5.27813	8.13438	1.9875	1.9875	col9910X		OP50			20	32		heat_stress				0	1		0	-0.002986
																						Earendil	20210719_AHS1_WT	Earendil_b::3	col9910X::OP50::20::heat_stress	b::3	3	b	5.27813	8.13438	1.9875	1.9875	col9910X		OP50			20	32		heat_stress				0	1		0	0.142847
																						Earendil	20210719_AHS1_WT	Earendil_b::3	col9910X::OP50::20::heat_stress	b::3	3	b	5.27813	8.13438	1.9875	1.9875	col9910X		OP50			20	32		heat_stress				0	1		0	2.30951
																						Earendil	20210719_AHS1_WT	Earendil_b::3	col9910X::OP50::20::heat_stress	b::3	3	b	5.27813	8.13438	1.9875	1.9875	col9910X		OP50			20	32		heat_stress				0	1		0	0.184514
																						Earendil	20210719_AHS1_WT	Earendil_b::3	col9910X::OP50::20::heat_stress	b::3	3	b	5.27813	8.13438	1.9875	1.9875	col9910X		OP50			20	32		heat_stress				0	1		0	0.017847
																						Earendil	20210719_AHS1_WT	Earendil_b::3	col9910X::OP50::20::heat_stress	b::3	3	b	5.27813	8.13438	1.9875	1.9875	col9910X		OP50			20	32		heat_stress				0	1		0	0.684514
																						Earendil	20210719_AHS1_WT	Earendil_b::3	col9910X::OP50::20::heat_stress	b::3	3	b	5.27813	8.13438	1.9875	1.9875	col9910X		OP50			20	32		heat_stress				0	1		0	0.017847
																						Earendil	20210719_AHS1_WT	Earendil_b::3	col9910X::OP50::20::heat_stress	b::3	3	b	5.27813	8.13438	1.9875	1.9875	col9910X		OP50			20	32		heat_stress				0	1		0	0.851181
																						Earendil	20210719_AHS1_WT	Earendil_b::3	col9910X::OP50::20::heat_stress	b::3	3	b	5.27813	8.13438	1.9875	1.9875	col9910X		OP50			20	32		heat_stress				0	1		0	0.059514
																						Earendil	20210719_AHS1_WT	Earendil_b::3	col9910X::OP50::20::heat_stress	b::3	3	b	5.27813	8.13438	1.9875	1.9875	col9910X		OP50			20	32		heat_stress				0	1		0	0.059514
																						Earendil	20210719_AHS1_WT	Earendil_b::3	col9910X::OP50::20::heat_stress	b::3	3	b	5.27813	8.13438	1.9875	1.9875	col9910X		OP50			20	32		heat_stress				0	1		0	0.101181
																						Earendil	20210719_AHS1_WT	Earendil_b::3	col9910X::OP50::20::heat_stress	b::3	3	b	5.27813	8.13438	1.9875	1.9875	col9910X		OP50			20	32		heat_stress				0	1		0	0.017847
																						Earendil	20210719_AHS1_WT	Earendil_b::3	col9910X::OP50::20::heat_stress	b::3	3	b	5.27813	8.13438	1.9875	1.9875	col9910X		OP50			20	32		heat_stress				0	1		0	0.059514
																						Earendil	20210719_AHS1_WT	Earendil_b::3	col9910X::OP50::20::heat_stress	b::3	3	b	5.27813	8.13438	1.9875	1.9875	col9910X		OP50			20	32		heat_stress				0	1		0	0.059514
																						Earendil	20210719_AHS1_WT	Earendil_b::3	col9910X::OP50::20::heat_stress	b::3	3	b	5.27813	8.13438	1.9875	1.9875	col9910X		OP50			20	32		heat_stress				0	1		0	0.142847
																						Earendil	20210719_AHS1_WT	Earendil_b::3	col9910X::OP50::20::heat_stress	b::3	3	b	5.27813	8.13438	1.9875	1.9875	col9910X		OP50			20	32		heat_stress				0	1		0	0.059514
																						Earendil	20210719_AHS1_WT	Earendil_b::3	col9910X::OP50::20::heat_stress	b::3	3	b	5.27813	8.13438	1.9875	1.9875	col9910X		OP50			20	32		heat_stress				0	1		0	0.059514
																						Earendil	20210719_AHS1_WT	Earendil_b::3	col9910X::OP50::20::heat_stress	b::3	3	b	5.27813	8.13438	1.9875	1.9875	col9910X		OP50			20	32		heat_stress				0	1		0	-0.002986
																						Earendil	20210719_AHS1_WT	Earendil_b::3	col9910X::OP50::20::heat_stress	b::3	3	b	5.27813	8.13438	1.9875	1.9875	col9910X		OP50			20	32		heat_stress				0	1		0	0.059514
																						Earendil	20210719_AHS1_WT	Earendil_b::3	col9910X::OP50::20::heat_stress	b::3	3	b	5.27813	8.13438	1.9875	1.9875	col9910X		OP50			20	32		heat_stress				0	1		0	0.017847
																						Earendil	20210719_AHS1_WT	Earendil_b::3	col9910X::OP50::20::heat_stress	b::3	3	b	5.27813	8.13438	1.9875	1.9875	col9910X		OP50			20	32		heat_stress				0	1		0	0.059514
																						Earendil	20210719_AHS1_WT	Earendil_b::3	col9910X::OP50::20::heat_stress	b::3	3	b	5.27813	8.13438	1.9875	1.9875	col9910X		OP50			20	32		heat_stress				0	1		0	-0.002986
																						Earendil	20210719_AHS1_WT	Earendil_b::3	col9910X::OP50::20::heat_stress	b::3	3	b	5.27813	8.13438	1.9875	1.9875	col9910X		OP50			20	32		heat_stress				0	1		0	-0.002986
																						Earendil	20210719_AHS1_WT	Earendil_b::3	col9910X::OP50::20::heat_stress	b::3	3	b	5.27813	8.13438	1.9875	1.9875	col9910X		OP50			20	32		heat_stress				0	0		0	0.809514
																						Earendil	20210719_AHS1_WT	Earendil_b::3	col9910X::OP50::20::heat_stress	b::3	3	b	5.27813	8.13438	1.9875	1.9875	col9910X		OP50			20	32		heat_stress				0	1		0	-0.002986
																						Earendil	20210719_AHS1_WT	Earendil_b::3	col9910X::OP50::20::heat_stress	b::3	3	b	5.27813	8.13438	1.9875	1.9875	col9910X		OP50			20	32		heat_stress				0	1		0	0.059514
																						Earendil	20210719_AHS1_WT	Earendil_b::3	col9910X::OP50::20::heat_stress	b::3	3	b	5.27813	8.13438	1.9875	1.9875	col9910X		OP50			20	32		heat_stress				0	0		0	0.767847
																						Earendil	20210719_AHS1_WT	Earendil_b::3	col9910X::OP50::20::heat_stress	b::3	3	b	5.27813	8.13438	1.9875	1.9875	col9910X		OP50			20	32		heat_stress				0	1		0	0.059514
																						Earendil	20210719_AHS1_WT	Earendil_b::3	col9910X::OP50::20::heat_stress	b::3	3	b	5.27813	8.13438	1.9875	1.9875	col9910X		OP50			20	32		heat_stress				0	0		0	0.351181
																						Earendil	20210719_AHS1_WT	Earendil_b::3	col9910X::OP50::20::heat_stress	b::3	3	b	5.27813	8.13438	1.9875	1.9875	col9910X		OP50			20	32		heat_stress				0	0		0	0.684514
																						Earendil	20210719_AHS1_WT	Earendil_b::3	col9910X::OP50::20::heat_stress	b::3	3	b	5.27813	8.13438	1.9875	1.9875	col9910X		OP50			20	32		heat_stress				0	0		0	0.684514
																						Earendil	20210719_AHS1_WT	Earendil_b::3	col9910X::OP50::20::heat_stress	b::3	3	b	5.27813	8.13438	1.9875	1.9875	col9910X		OP50			20	32		heat_stress				0	0		0	0.642847
																						Earendil	20210719_AHS1_WT	Earendil_b::3	col9910X::OP50::20::heat_stress	b::3	3	b	5.27813	8.13438	1.9875	1.9875	col9910X		OP50			20	32		heat_stress				0	0		0	0.684514
																						Earendil	20210719_AHS1_WT	Earendil_b::3	col9910X::OP50::20::heat_stress	b::3	3	b	5.27813	8.13438	1.9875	1.9875	col9910X		OP50			20	32		heat_stress				0	0		0	0.642847
																						Earendil	20210719_AHS1_WT	Earendil_b::3	col9910X::OP50::20::heat_stress	b::3	3	b	5.27813	8.13438	1.9875	1.9875	col9910X		OP50			20	32		heat_stress				0	0		0	0.059514
																						Earendil	20210719_AHS1_WT	Earendil_b::3	col9910X::OP50::20::heat_stress	b::3	3	b	5.27813	8.13438	1.9875	1.9875	col9910X		OP50			20	32		heat_stress				0	0		0	0.642847
																						Earendil	20210719_AHS1_WT	Earendil_b::3	col9910X::OP50::20::heat_stress	b::3	3	b	5.27813	8.13438	1.9875	1.9875	col9910X		OP50			20	32		heat_stress				0	0		0	0.559514
																						Earendil	20210719_AHS1_WT	Earendil_b::3	col9910X::OP50::20::heat_stress	b::3	3	b	5.27813	8.13438	1.9875	1.9875	col9910X		OP50			20	32		heat_stress				0	0		0	0.601181
																						Earendil	20210719_AHS1_WT	Earendil_b::3	col9910X::OP50::20::heat_stress	b::3	3	b	5.27813	8.13438	1.9875	1.9875	col9910X		OP50			20	32		heat_stress				0	0		0	0.434514
																						Earendil	20210719_AHS1_WT	Earendil_b::3	col9910X::OP50::20::heat_stress	b::3	3	b	5.27813	8.13438	1.9875	1.9875	col9910X		OP50			20	32		heat_stress				0	0		0	0.517847
																						Earendil	20210719_AHS1_WT	Earendil_b::3	col9910X::OP50::20::heat_stress	b::3	3	b	5.27813	8.13438	1.9875	1.9875	col9910X		OP50			20	32		heat_stress				0	0		0	0.559514
																						Earendil	20210719_AHS1_WT	Earendil_b::3	col9910X::OP50::20::heat_stress	b::3	3	b	5.27813	8.13438	1.9875	1.9875	col9910X		OP50			20	32		heat_stress				0	1		0	0.059514
																						Earendil	20210719_AHS1_WT	Earendil_b::3	col9910X::OP50::20::heat_stress	b::3	3	b	5.27813	8.13438	1.9875	1.9875	col9910X		OP50			20	32		heat_stress				0	0		0	0.476181
																						Earendil	20210719_AHS1_WT	Earendil_b::3	col9910X::OP50::20::heat_stress	b::3	3	b	5.27813	8.13438	1.9875	1.9875	col9910X		OP50			20	32		heat_stress				0	0		0	0.142847
																						Earendil	20210719_AHS1_WT	Earendil_b::3	col9910X::OP50::20::heat_stress	b::3	3	b	5.27813	8.13438	1.9875	1.9875	col9910X		OP50			20	32		heat_stress				0	0		0	0.517847
																						Earendil	20210719_AHS1_WT	Earendil_b::3	col9910X::OP50::20::heat_stress	b::3	3	b	5.27813	8.13438	1.9875	1.9875	col9910X		OP50			20	32		heat_stress				0	0		0	0.517847
																						Earendil	20210719_AHS1_WT	Earendil_b::3	col9910X::OP50::20::heat_stress	b::3	3	b	5.27813	8.13438	1.9875	1.9875	col9910X		OP50			20	32		heat_stress				0	0		0	0.476181
																						Earendil	20210719_AHS1_WT	Earendil_b::3	col9910X::OP50::20::heat_stress	b::3	3	b	5.27813	8.13438	1.9875	1.9875	col9910X		OP50			20	32		heat_stress				0	0		0	0.517847
																						Earendil	20210719_AHS1_WT	Earendil_b::3	col9910X::OP50::20::heat_stress	b::3	3	b	5.27813	8.13438	1.9875	1.9875	col9910X		OP50			20	32		heat_stress				0	1		0	-0.002986
																						Earendil	20210719_AHS1_WT	Earendil_b::3	col9910X::OP50::20::heat_stress	b::3	3	b	5.27813	8.13438	1.9875	1.9875	col9910X		OP50			20	32		heat_stress				0	1		0	-0.002986
																						Earendil	20210719_AHS1_WT	Earendil_b::3	col9910X::OP50::20::heat_stress	b::3	3	b	5.27813	8.13438	1.9875	1.9875	col9910X		OP50			20	32		heat_stress				0	0		0	0.476181
																						Earendil	20210719_AHS1_WT	Earendil_b::3	col9910X::OP50::20::heat_stress	b::3	3	b	5.27813	8.13438	1.9875	1.9875	col9910X		OP50			20	32		heat_stress				0	0		0	0.392847
																						Earendil	20210719_AHS1_WT	Earendil_b::3	col9910X::OP50::20::heat_stress	b::3	3	b	5.27813	8.13438	1.9875	1.9875	col9910X		OP50			20	32		heat_stress				0	1		0	0.059514
																						Earendil	20210719_AHS1_WT	Earendil_b::3	col9910X::OP50::20::heat_stress	b::3	3	b	5.27813	8.13438	1.9875	1.9875	col9910X		OP50			20	32		heat_stress				0	0		0	0.392847
																						Earendil	20210719_AHS1_WT	Earendil_b::3	col9910X::OP50::20::heat_stress	b::3	3	b	5.27813	8.13438	1.9875	1.9875	col9910X		OP50			20	32		heat_stress				0	1		0	-0.002986
																						Earendil	20210719_AHS1_WT	Earendil_b::3	col9910X::OP50::20::heat_stress	b::3	3	b	5.27813	8.13438	1.9875	1.9875	col9910X		OP50			20	32		heat_stress				0	0		0	0.351181
																						Earendil	20210719_AHS1_WT	Earendil_b::3	col9910X::OP50::20::heat_stress	b::3	3	b	5.27813	8.13438	1.9875	1.9875	col9910X		OP50			20	32		heat_stress				0	1		0	0.059514
																						Earendil	20210719_AHS1_WT	Earendil_b::3	col9910X::OP50::20::heat_stress	b::3	3	b	5.27813	8.13438	1.9875	1.9875	col9910X		OP50			20	32		heat_stress				0	0		0	0.184514
																						Earendil	20210719_AHS1_WT	Earendil_b::3	col9910X::OP50::20::heat_stress	b::3	3	b	5.27813	8.13438	1.9875	1.9875	col9910X		OP50			20	32		heat_stress				0	0		0	0.226181
																						Earendil	20210719_AHS1_WT	Earendil_b::3	col9910X::OP50::20::heat_stress	b::3	3	b	5.27813	8.13438	1.9875	1.9875	col9910X		OP50			20	32		heat_stress				0	1		0	0.101181
																						Earendil	20210719_AHS1_WT	Earendil_b::3	col9910X::OP50::20::heat_stress	b::3	3	b	5.27813	8.13438	1.9875	1.9875	col9910X		OP50			20	32		heat_stress				0	0		0	0.101181
																						Earendil	20210719_AHS1_WT	Earendil_b::3	col9910X::OP50::20::heat_stress	b::3	3	b	5.27813	8.13438	1.9875	1.9875	col9910X		OP50			20	32		heat_stress				0	0		0	0.101181
																						Earendil	20210719_AHS1_WT	Earendil_b::3	col9910X::OP50::20::heat_stress	b::3	3	b	5.27813	8.13438	1.9875	1.9875	col9910X		OP50			20	32		heat_stress				0	1		0	0.267847
																						Earendil	20210719_AHS1_WT	Earendil_b::3	col9910X::OP50::20::heat_stress	b::3	3	b	5.27813	8.13438	1.9875	1.9875	col9910X		OP50			20	32		heat_stress				0	0		0	0.101181
																						Earendil	20210719_AHS1_WT	Earendil_b::3	col9910X::OP50::20::heat_stress	b::3	3	b	5.27813	8.13438	1.9875	1.9875	col9910X		OP50			20	32		heat_stress				0	0		0	0.059514
																						Earendil	20210719_AHS1_WT	Earendil_b::3	col9910X::OP50::20::heat_stress	b::3	3	b	5.27813	8.13438	1.9875	1.9875	col9910X		OP50			20	32		heat_stress				0	0		0	0.226181
																						Earendil	20210719_AHS1_WT	Earendil_b::3	col9910X::OP50::20::heat_stress	b::3	3	b	5.27813	8.13438	1.9875	1.9875	col9910X		OP50			20	32		heat_stress				0	1	Extra worm from multiple-worm disambiguation	0	0.059514
																						Earendil	20210719_AHS1_WT	Earendil_b::3	col9910X::OP50::20::heat_stress	b::3	3	b	5.27813	8.13438	1.9875	1.9875	col9910X		OP50			20	32		heat_stress				0	1		0	0.059514
																						Earendil	20210719_AHS1_WT	Earendil_b::3	col9910X::OP50::20::heat_stress	b::3	3	b	5.27813	8.13438	1.9875	1.9875	col9910X		OP50			20	32		heat_stress				0	0		0	0.059514
																						Earendil	20210719_AHS1_WT	Earendil_b::3	col9910X::OP50::20::heat_stress	b::3	3	b	5.27813	8.13438	1.9875	1.9875	col9910X		OP50			20	32		heat_stress				0	0		0	0.059514
																						Earendil	20210719_AHS1_WT	Earendil_b::3	col9910X::OP50::20::heat_stress	b::3	3	b	5.27813	8.13438	1.9875	1.9875	col9910X		OP50			20	32		heat_stress				0	0		0	0.059514
																						Earendil	20210719_AHS1_WT	Earendil_b::3	col9910X::OP50::20::heat_stress	b::3	3	b	5.27813	8.13438	1.9875	1.9875	col9910X		OP50			20	32		heat_stress				0	1		0	-0.002986
																						Earendil	20210719_AHS1_WT	Earendil_b::3	col9910X::OP50::20::heat_stress	b::3	3	b	5.27813	8.13438	1.9875	1.9875	col9910X		OP50			20	32		heat_stress				0	0		0	0.101181
																						Earendil	20210719_AHS1_WT	Earendil_b::3	col9910X::OP50::20::heat_stress	b::3	3	b	5.27813	8.13438	1.9875	1.9875	col9910X		OP50			20	32		heat_stress				0	1		0	-0.002986
																						Earendil	20210719_AHS1_WT	Earendil_b::3	col9910X::OP50::20::heat_stress	b::3	3	b	5.27813	8.13438	1.9875	1.9875	col9910X		OP50			20	32		heat_stress				0	0		0	0.059514
																						Earendil	20210719_AHS1_WT	Earendil_b::3	col9910X::OP50::20::heat_stress	b::3	3	b	5.27813	8.13438	1.9875	1.9875	col9910X		OP50			20	32		heat_stress				0	1		0	-0.002986
																						Earendil	20210719_AHS1_WT	Earendil_b::3	col9910X::OP50::20::heat_stress	b::3	3	b	5.27813	8.13438	1.9875	1.9875	col9910X		OP50			20	32		heat_stress				0	0		0	0.059514
																						Earendil	20210719_AHS1_WT	Earendil_b::3	col9910X::OP50::20::heat_stress	b::3	3	b	5.27813	8.13438	1.9875	1.9875	col9910X		OP50			20	32		heat_stress				0	0		0	-0.002986
																						Earendil	20210719_AHS1_WT	Earendil_b::3	col9910X::OP50::20::heat_stress	b::3	3	b	5.27813	8.13438	1.9875	1.9875	col9910X		OP50			20	32		heat_stress				0	1		0	-0.002986
																						Earendil	20210719_AHS1_WT	Earendil_b::3	col9910X::OP50::20::heat_stress	b::3	3	b	5.27813	8.13438	1.9875	1.9875	col9910X		OP50			20	32		heat_stress				0	0		0	-0.002986
																						Earendil	20210719_AHS1_WT	Earendil_b::3	col9910X::OP50::20::heat_stress	b::3	3	b	5.27813	8.13438	1.9875	1.9875	col9910X		OP50			20	32		heat_stress				0	1		0	-0.002986
																						Earendil	20210719_AHS1_WT	Earendil_b::3	col9910X::OP50::20::heat_stress	b::3	3	b	5.27813	8.13438	1.9875	1.9875	col9910X		OP50			20	32		heat_stress				0	1		0	-0.002986
																						Earendil	20210719_AHS1_WT	Earendil_b::3	col9910X::OP50::20::heat_stress	b::3	3	b	5.27813	8.13438	1.9875	1.9875	col9910X		OP50			20	32		heat_stress				0	1		0	-0.002986
																						Earendil	20210719_AHS1_WT	Earendil_b::3	col9910X::OP50::20::heat_stress	b::3	3	b	5.27813	8.13438	1.9875	1.9875	col9910X		OP50			20	32		heat_stress				0	0		0	0.059514
																						Earendil	20210719_AHS1_WT	Earendil_b::3	col9910X::OP50::20::heat_stress	b::3	3	b	5.27813	8.13438	1.9875	1.9875	col9910X		OP50			20	32		heat_stress				0	0		0	0.059514
																						Earendil	20210719_AHS1_WT	Earendil_b::3	col9910X::OP50::20::heat_stress	b::3	3	b	5.27813	8.13438	1.9875	1.9875	col9910X		OP50			20	32		heat_stress				0	0		0	-0.002986
																						Earendil	20210719_AHS1_WT	Earendil_b::3	col9910X::OP50::20::heat_stress	b::3	3	b	5.27813	8.13438	1.9875	1.9875	col9910X		OP50			20	32		heat_stress				0	0		0	0.142847
																						Earendil	20210719_AHS1_WT	Earendil_b::3	col9910X::OP50::20::heat_stress	b::3	3	b	5.27813	8.13438	1.9875	1.9875	col9910X		OP50			20	32		heat_stress				0	1		0	0.017847
																						Earendil	20210719_AHS1_WT	Earendil_b::3	col9910X::OP50::20::heat_stress	b::3	3	b	5.27813	8.13438	1.9875	1.9875	col9910X		OP50			20	32		heat_stress				0	0		0	0.059514
																						Earendil	20210719_AHS1_WT	Earendil_b::3	col9910X::OP50::20::heat_stress	b::3	3	b	5.27813	8.13438	1.9875	1.9875	col9910X		OP50			20	32		heat_stress				0	1		0	-0.002986
																						Earendil	20210719_AHS1_WT	Earendil_b::3	col9910X::OP50::20::heat_stress	b::3	3	b	5.27813	8.13438	1.9875	1.9875	col9910X		OP50			20	32		heat_stress				0	1		0	-0.002986
																						Earendil	20210719_AHS1_WT	Earendil_b::3	col9910X::OP50::20::heat_stress	b::3	3	b	5.27813	8.13438	1.9875	1.9875	col9910X		OP50			20	32		heat_stress				0	1		0	-0.002986
																						Earendil	20210719_AHS1_WT	Earendil_b::3	col9910X::OP50::20::heat_stress	b::3	3	b	5.27813	8.13438	1.9875	1.9875	col9910X		OP50			20	32		heat_stress				0	1		0	-0.002986
																						Earendil	20210719_AHS1_WT	Earendil_b::3	col9910X::OP50::20::heat_stress	b::3	3	b	5.27813	8.13438	1.9875	1.9875	col9910X		OP50			20	32		heat_stress				0	1		0	-0.002986
																						Earendil	20210719_AHS1_WT	Earendil_b::3	col9910X::OP50::20::heat_stress	b::3	3	b	5.27813	8.13438	1.9875	1.9875	col9910X		OP50			20	32		heat_stress				0	1		0	-0.002986
																						Earendil	20210719_AHS1_WT	Earendil_b::3	col9910X::OP50::20::heat_stress	b::3	3	b	5.27813	8.13438	1.9875	1.9875	col9910X		OP50			20	32		heat_stress				0	1		0	-0.002986
																						Earendil	20210719_AHS1_WT	Earendil_b::3	col9910X::OP50::20::heat_stress	b::3	3	b	5.27813	8.13438	1.9875	1.9875	col9910X		OP50			20	32		heat_stress				0	1		0	-0.002986
																						Earendil	20210719_AHS1_WT	Earendil_b::3	col9910X::OP50::20::heat_stress	b::3	3	b	5.27813	8.13438	1.9875	1.9875	col9910X		OP50			20	32		heat_stress				0	1		0	-0.002986
																						Earendil	20210719_AHS1_WT	Earendil_b::3	col9910X::OP50::20::heat_stress	b::3	3	b	5.27813	8.13438	1.9875	1.9875	col9910X		OP50			20	32		heat_stress				0	1		0	0.017847
																						Earendil	20210719_AHS1_WT	Earendil_b::3	col9910X::OP50::20::heat_stress	b::3	3	b	5.27813	8.13438	1.9875	1.9875	col9910X		OP50			20	32		heat_stress				0	0		0	0.059514
																						Earendil	20210719_AHS1_WT	Earendil_b::3	col9910X::OP50::20::heat_stress	b::3	3	b	5.27813	8.13438	1.9875	1.9875	col9910X		OP50			20	32		heat_stress				0	1		0	0.059514
																						Earendil	20210719_AHS1_WT	Earendil_b::3	col9910X::OP50::20::heat_stress	b::3	3	b	5.27813	8.13438	1.9875	1.9875	col9910X		OP50			20	32		heat_stress				0	1		0	0.017847
																						Earendil	20210719_AHS1_WT	Earendil_b::3	col9910X::OP50::20::heat_stress	b::3	3	b	5.27813	8.13438	1.9875	1.9875	col9910X		OP50			20	32		heat_stress				0	1		0	-0.002986
																						Earendil	20210719_AHS1_WT	Earendil_b::3	col9910X::OP50::20::heat_stress	b::3	3	b	5.27813	8.13438	1.9875	1.9875	col9910X		OP50			20	32		heat_stress				0	1		0	-0.002986
																						Earendil	20210719_AHS1_WT	Earendil_b::3	col9910X::OP50::20::heat_stress	b::3	3	b	5.27813	8.13438	1.9875	1.9875	col9910X		OP50			20	32		heat_stress				0	0		0	0.059514
																						Earendil	20210719_AHS1_WT	Earendil_b::3	col9910X::OP50::20::heat_stress	b::3	3	b	5.27813	8.13438	1.9875	1.9875	col9910X		OP50			20	32		heat_stress				0	1		0	-0.002986
																						Earendil	20210719_AHS1_WT	Earendil_b::3	col9910X::OP50::20::heat_stress	b::3	3	b	5.27813	8.13438	1.9875	1.9875	col9910X		OP50			20	32		heat_stress				0	1		0	-0.002986
																						Earendil	20210719_AHS1_WT	Earendil_b::3	col9910X::OP50::20::heat_stress	b::3	3	b	5.27813	8.13438	1.9875	1.9875	col9910X		OP50			20	32		heat_stress				0	1		0	0.017847
																						Earendil	20210719_AHS1_WT	Earendil_b::3	col9910X::OP50::20::heat_stress	b::3	3	b	5.27813	8.13438	1.9875	1.9875	col9910X		OP50			20	32		heat_stress				0	1		0	0.017847
																						Earendil	20210719_AHS1_WT	Earendil_b::3	col9910X::OP50::20::heat_stress	b::3	3	b	5.27813	8.13438	1.9875	1.9875	col9910X		OP50			20	32		heat_stress				0	1		0	0.017847
																						Earendil	20210719_AHS1_WT	Earendil_b::3	col9910X::OP50::20::heat_stress	b::3	3	b	5.27813	8.13438	1.9875	1.9875	col9910X		OP50			20	32		heat_stress				0	1		0	0.017847
																						Earendil	20210719_AHS1_WT	Earendil_b::3	col9910X::OP50::20::heat_stress	b::3	3	b	5.27813	8.13438	1.9875	1.9875	col9910X		OP50			20	32		heat_stress				0	1		0	-0.002986
																						Earendil	20210719_AHS1_WT	Earendil_b::3	col9910X::OP50::20::heat_stress	b::3	3	b	5.27813	8.13438	1.9875	1.9875	col9910X		OP50			20	32		heat_stress				0	0		0	0.059514
																						Earendil	20210719_AHS1_WT	Earendil_b::3	col9910X::OP50::20::heat_stress	b::3	3	b	5.27813	8.13438	1.9875	1.9875	col9910X		OP50			20	32		heat_stress				0	1		0	0.142847
																						Earendil	20210719_AHS1_WT	Earendil_b::3	col9910X::OP50::20::heat_stress	b::3	3	b	5.27813	8.13438	1.9875	1.9875	col9910X		OP50			20	32		heat_stress				0	1		0	-0.002986
																						Earendil	20210719_AHS1_WT	Earendil_b::3	col9910X::OP50::20::heat_stress	b::3	3	b	5.27813	8.13438	1.9875	1.9875	col9910X		OP50			20	32		heat_stress				0	1		0	0.559514
																						Earendil	20210719_AHS1_WT	Earendil_b::3	col9910X::OP50::20::heat_stress	b::3	3	b	5.27813	8.13438	1.9875	1.9875	col9910X		OP50			20	32		heat_stress				0	1		0	0.184514
																						Earendil	20210719_AHS1_WT	Earendil_b::3	col9910X::OP50::20::heat_stress	b::3	3	b	5.27813	8.13438	1.9875	1.9875	col9910X		OP50			20	32		heat_stress				0	1		0	-0.002986
																						Earendil	20210719_AHS1_WT	Earendil_b::3	col9910X::OP50::20::heat_stress	b::3	3	b	5.27813	8.13438	1.9875	1.9875	col9910X		OP50			20	32		heat_stress				0	1		0	0.017847
																						Earendil	20210719_AHS1_WT	Earendil_b::3	col9910X::OP50::20::heat_stress	b::3	3	b	5.27813	8.13438	1.9875	1.9875	col9910X		OP50			20	32		heat_stress				0	1		0	0.184514
																						Earendil	20210719_AHS1_WT	Earendil_b::3	col9910X::OP50::20::heat_stress	b::3	3	b	5.27813	8.13438	1.9875	1.9875	col9910X		OP50			20	32		heat_stress				0	1		0	0.851181
																						Earendil	20210719_AHS1_WT	Earendil_b::3	col9910X::OP50::20::heat_stress	b::3	3	b	5.27813	8.13438	1.9875	1.9875	col9910X		OP50			20	32		heat_stress				0	1		0	0.101181
																						Earendil	20210719_AHS1_WT	Earendil_b::3	col9910X::OP50::20::heat_stress	b::3	3	b	5.27813	8.13438	1.9875	1.9875	col9910X		OP50			20	32		heat_stress				0	1		0	0.392847
																						Earendil	20210719_AHS1_WT	Earendil_b::3	col9910X::OP50::20::heat_stress	b::3	3	b	5.27813	8.13438	1.9875	1.9875	col9910X		OP50			20	32		heat_stress				0	1		0	0.392847
																						Earendil	20210719_AHS1_WT	Earendil_b::3	col9910X::OP50::20::heat_stress	b::3	3	b	5.27813	8.13438	1.9875	1.9875	col9910X		OP50			20	32		heat_stress				0	0		0	0.184514
																						Earendil	20210719_AHS1_WT	Earendil_b::3	col9910X::OP50::20::heat_stress	b::3	3	b	5.27813	8.13438	1.9875	1.9875	col9910X		OP50			20	32		heat_stress				0	0		0	0.267847
																						Earendil	20210719_AHS1_WT	Earendil_b::3	col9910X::OP50::20::heat_stress	b::3	3	b	5.27813	8.13438	1.9875	1.9875	col9910X		OP50			20	32		heat_stress				0	0		0	0.267847
																						Earendil	20210719_AHS1_WT	Earendil_b::3	col9910X::OP50::20::heat_stress	b::3	3	b	5.27813	8.13438	1.9875	1.9875	col9910X		OP50			20	32		heat_stress				0	0		0	0.101181
																						Earendil	20210719_AHS1_WT	Earendil_b::3	col9910X::OP50::20::heat_stress	b::3	3	b	5.27813	8.13438	1.9875	1.9875	col9910X		OP50			20	32		heat_stress				0	0		0	0.142847
																						Earendil	20210719_AHS1_WT	Earendil_b::3	col9910X::OP50::20::heat_stress	b::3	3	b	5.27813	8.13438	1.9875	1.9875	col9910X		OP50			20	32		heat_stress				0	0		0	0.101181
																						Earendil	20210719_AHS1_WT	Earendil_a::3	WT::OP50::20::heat_stress	a::3	3	a	3.37031	8.03438	1.97812	1.9875	WT		OP50			20	32		heat_stress				0	1		0	-0.023819
																						Earendil	20210719_AHS1_WT	Earendil_a::3	WT::OP50::20::heat_stress	a::3	3	a	3.37031	8.03438	1.97812	1.9875	WT		OP50			20	32		heat_stress				0	1		0	0.830347
																						Earendil	20210719_AHS1_WT	Earendil_a::3	WT::OP50::20::heat_stress	a::3	3	a	3.37031	8.03438	1.97812	1.9875	WT		OP50			20	32		heat_stress				0	1		0	0.538681
																						Earendil	20210719_AHS1_WT	Earendil_a::3	WT::OP50::20::heat_stress	a::3	3	a	3.37031	8.03438	1.97812	1.9875	WT		OP50			20	32		heat_stress				0	1		0	-0.023819
																						Earendil	20210719_AHS1_WT	Earendil_a::3	WT::OP50::20::heat_stress	a::3	3	a	3.37031	8.03438	1.97812	1.9875	WT		OP50			20	32		heat_stress				0	1		0	0.413681
																						Earendil	20210719_AHS1_WT	Earendil_a::3	WT::OP50::20::heat_stress	a::3	3	a	3.37031	8.03438	1.97812	1.9875	WT		OP50			20	32		heat_stress				0	1		0	-0.002986
																						Earendil	20210719_AHS1_WT	Earendil_a::3	WT::OP50::20::heat_stress	a::3	3	a	3.37031	8.03438	1.97812	1.9875	WT		OP50			20	32		heat_stress				0	1		0	0.122014
																						Earendil	20210719_AHS1_WT	Earendil_a::3	WT::OP50::20::heat_stress	a::3	3	a	3.37031	8.03438	1.97812	1.9875	WT		OP50			20	32		heat_stress				0	0		0	-0.023819
																						Earendil	20210719_AHS1_WT	Earendil_a::3	WT::OP50::20::heat_stress	a::3	3	a	3.37031	8.03438	1.97812	1.9875	WT		OP50			20	32		heat_stress				0	1		0	0.038681
																						Earendil	20210719_AHS1_WT	Earendil_a::3	WT::OP50::20::heat_stress	a::3	3	a	3.37031	8.03438	1.97812	1.9875	WT		OP50			20	32		heat_stress				0	1		0	-0.023819
																						Earendil	20210719_AHS1_WT	Earendil_a::3	WT::OP50::20::heat_stress	a::3	3	a	3.37031	8.03438	1.97812	1.9875	WT		OP50			20	32		heat_stress				0	1		0	2.45535
																						Earendil	20210719_AHS1_WT	Earendil_a::3	WT::OP50::20::heat_stress	a::3	3	a	3.37031	8.03438	1.97812	1.9875	WT		OP50			20	32		heat_stress				0	1		0	-0.023819
																						Earendil	20210719_AHS1_WT	Earendil_a::3	WT::OP50::20::heat_stress	a::3	3	a	3.37031	8.03438	1.97812	1.9875	WT		OP50			20	32		heat_stress				0	1		0	0.747014
																						Earendil	20210719_AHS1_WT	Earendil_a::3	WT::OP50::20::heat_stress	a::3	3	a	3.37031	8.03438	1.97812	1.9875	WT		OP50			20	32		heat_stress				0	1		0	-0.002986
																						Earendil	20210719_AHS1_WT	Earendil_a::3	WT::OP50::20::heat_stress	a::3	3	a	3.37031	8.03438	1.97812	1.9875	WT		OP50			20	32		heat_stress				0	1		0	-0.023819
																						Earendil	20210719_AHS1_WT	Earendil_a::3	WT::OP50::20::heat_stress	a::3	3	a	3.37031	8.03438	1.97812	1.9875	WT		OP50			20	32		heat_stress				0	1		0	0.122014
																						Earendil	20210719_AHS1_WT	Earendil_a::3	WT::OP50::20::heat_stress	a::3	3	a	3.37031	8.03438	1.97812	1.9875	WT		OP50			20	32		heat_stress				0	1		0	-0.002986
																						Earendil	20210719_AHS1_WT	Earendil_a::3	WT::OP50::20::heat_stress	a::3	3	a	3.37031	8.03438	1.97812	1.9875	WT		OP50			20	32		heat_stress				0	1		0	1.58035
																						Earendil	20210719_AHS1_WT	Earendil_a::3	WT::OP50::20::heat_stress	a::3	3	a	3.37031	8.03438	1.97812	1.9875	WT		OP50			20	32		heat_stress				0	1		0	0.538681
																						Earendil	20210719_AHS1_WT	Earendil_a::3	WT::OP50::20::heat_stress	a::3	3	a	3.37031	8.03438	1.97812	1.9875	WT		OP50			20	32		heat_stress				0	1	Extra worm from multiple-worm disambiguation	0	1.03868
																						Earendil	20210719_AHS1_WT	Earendil_a::3	WT::OP50::20::heat_stress	a::3	3	a	3.37031	8.03438	1.97812	1.9875	WT		OP50			20	32		heat_stress				0	0		0	0.705347
																						Earendil	20210719_AHS1_WT	Earendil_a::3	WT::OP50::20::heat_stress	a::3	3	a	3.37031	8.03438	1.97812	1.9875	WT		OP50			20	32		heat_stress				0	1		0	-0.023819
																						Earendil	20210719_AHS1_WT	Earendil_a::3	WT::OP50::20::heat_stress	a::3	3	a	3.37031	8.03438	1.97812	1.9875	WT		OP50			20	32		heat_stress				0	1		0	0.330347
																						Earendil	20210719_AHS1_WT	Earendil_a::3	WT::OP50::20::heat_stress	a::3	3	a	3.37031	8.03438	1.97812	1.9875	WT		OP50			20	32		heat_stress				0	1		0	1.24701
																						Earendil	20210719_AHS1_WT	Earendil_a::3	WT::OP50::20::heat_stress	a::3	3	a	3.37031	8.03438	1.97812	1.9875	WT		OP50			20	32		heat_stress				0	1		0	-0.023819
																						Earendil	20210719_AHS1_WT	Earendil_a::3	WT::OP50::20::heat_stress	a::3	3	a	3.37031	8.03438	1.97812	1.9875	WT		OP50			20	32		heat_stress				0	1		0	0.455347
																						Earendil	20210719_AHS1_WT	Earendil_a::3	WT::OP50::20::heat_stress	a::3	3	a	3.37031	8.03438	1.97812	1.9875	WT		OP50			20	32		heat_stress				0	1		0	0.913681
																						Earendil	20210719_AHS1_WT	Earendil_a::3	WT::OP50::20::heat_stress	a::3	3	a	3.37031	8.03438	1.97812	1.9875	WT		OP50			20	32		heat_stress				0	1		0	0.497014
																						Earendil	20210719_AHS1_WT	Earendil_a::3	WT::OP50::20::heat_stress	a::3	3	a	3.37031	8.03438	1.97812	1.9875	WT		OP50			20	32		heat_stress				0	1		0	-0.023819
																						Earendil	20210719_AHS1_WT	Earendil_a::3	WT::OP50::20::heat_stress	a::3	3	a	3.37031	8.03438	1.97812	1.9875	WT		OP50			20	32		heat_stress				0	0		0	-0.002986
																						Earendil	20210719_AHS1_WT	Earendil_a::3	WT::OP50::20::heat_stress	a::3	3	a	3.37031	8.03438	1.97812	1.9875	WT		OP50			20	32		heat_stress				0	0		0	0.497014
																						Earendil	20210719_AHS1_WT	Earendil_a::3	WT::OP50::20::heat_stress	a::3	3	a	3.37031	8.03438	1.97812	1.9875	WT		OP50			20	32		heat_stress				0	1		0	-0.023819
																						Earendil	20210719_AHS1_WT	Earendil_a::3	WT::OP50::20::heat_stress	a::3	3	a	3.37031	8.03438	1.97812	1.9875	WT		OP50			20	32		heat_stress				0	0		0	-0.002986
																						Earendil	20210719_AHS1_WT	Earendil_a::3	WT::OP50::20::heat_stress	a::3	3	a	3.37031	8.03438	1.97812	1.9875	WT		OP50			20	32		heat_stress				0	1		0	-0.023819
																						Earendil	20210719_AHS1_WT	Earendil_a::3	WT::OP50::20::heat_stress	a::3	3	a	3.37031	8.03438	1.97812	1.9875	WT		OP50			20	32		heat_stress				0	1		0	0.413681
																						Earendil	20210719_AHS1_WT	Earendil_a::3	WT::OP50::20::heat_stress	a::3	3	a	3.37031	8.03438	1.97812	1.9875	WT		OP50			20	32		heat_stress				0	1		0	0.038681
																						Earendil	20210719_AHS1_WT	Earendil_a::3	WT::OP50::20::heat_stress	a::3	3	a	3.37031	8.03438	1.97812	1.9875	WT		OP50			20	32		heat_stress				0	1		0	-0.023819
																						Earendil	20210719_AHS1_WT	Earendil_a::3	WT::OP50::20::heat_stress	a::3	3	a	3.37031	8.03438	1.97812	1.9875	WT		OP50			20	32		heat_stress				0	1		0	0.038681
																						Earendil	20210719_AHS1_WT	Earendil_a::3	WT::OP50::20::heat_stress	a::3	3	a	3.37031	8.03438	1.97812	1.9875	WT		OP50			20	32		heat_stress				0	1		0	-0.023819
																						Earendil	20210719_AHS1_WT	Earendil_a::3	WT::OP50::20::heat_stress	a::3	3	a	3.37031	8.03438	1.97812	1.9875	WT		OP50			20	32		heat_stress				0	1		0	0.830347
																						Earendil	20210719_AHS1_WT	Earendil_a::3	WT::OP50::20::heat_stress	a::3	3	a	3.37031	8.03438	1.97812	1.9875	WT		OP50			20	32		heat_stress				0	1		0	0.997014
																						Earendil	20210719_AHS1_WT	Earendil_a::3	WT::OP50::20::heat_stress	a::3	3	a	3.37031	8.03438	1.97812	1.9875	WT		OP50			20	32		heat_stress				0	1		0	0.830347
																						Earendil	20210719_AHS1_WT	Earendil_a::3	WT::OP50::20::heat_stress	a::3	3	a	3.37031	8.03438	1.97812	1.9875	WT		OP50			20	32		heat_stress				0	0		0	0.455347
																						Earendil	20210719_AHS1_WT	Earendil_a::3	WT::OP50::20::heat_stress	a::3	3	a	3.37031	8.03438	1.97812	1.9875	WT		OP50			20	32		heat_stress				0	0		0	0.122014
																						Earendil	20210719_AHS1_WT	Earendil_a::3	WT::OP50::20::heat_stress	a::3	3	a	3.37031	8.03438	1.97812	1.9875	WT		OP50			20	32		heat_stress				0	0		0	-0.023819
																						Earendil	20210719_AHS1_WT	Earendil_a::3	WT::OP50::20::heat_stress	a::3	3	a	3.37031	8.03438	1.97812	1.9875	WT		OP50			20	32		heat_stress				0	1		0	-0.023819
																						Earendil	20210719_AHS1_WT	Earendil_a::3	WT::OP50::20::heat_stress	a::3	3	a	3.37031	8.03438	1.97812	1.9875	WT		OP50			20	32		heat_stress				0	1		0	0.455347
																						Earendil	20210719_AHS1_WT	Earendil_a::3	WT::OP50::20::heat_stress	a::3	3	a	3.37031	8.03438	1.97812	1.9875	WT		OP50			20	32		heat_stress				0	1		0	0.663681
																						Earendil	20210719_AHS1_WT	Earendil_a::3	WT::OP50::20::heat_stress	a::3	3	a	3.37031	8.03438	1.97812	1.9875	WT		OP50			20	32		heat_stress				0	0		0	-0.002986
																						Earendil	20210719_AHS1_WT	Earendil_a::3	WT::OP50::20::heat_stress	a::3	3	a	3.37031	8.03438	1.97812	1.9875	WT		OP50			20	32		heat_stress				0	1		0	0.955347
																						Earendil	20210719_AHS1_WT	Earendil_a::3	WT::OP50::20::heat_stress	a::3	3	a	3.37031	8.03438	1.97812	1.9875	WT		OP50			20	32		heat_stress				0	1		0	0.705347
																						Earendil	20210719_AHS1_WT	Earendil_a::3	WT::OP50::20::heat_stress	a::3	3	a	3.37031	8.03438	1.97812	1.9875	WT		OP50			20	32		heat_stress				0	1		0	-0.023819
																						Earendil	20210719_AHS1_WT	Earendil_a::3	WT::OP50::20::heat_stress	a::3	3	a	3.37031	8.03438	1.97812	1.9875	WT		OP50			20	32		heat_stress				0	1		0	0.455347
																						Earendil	20210719_AHS1_WT	Earendil_a::3	WT::OP50::20::heat_stress	a::3	3	a	3.37031	8.03438	1.97812	1.9875	WT		OP50			20	32		heat_stress				0	1		0	0.622014
																						Earendil	20210719_AHS1_WT	Earendil_a::3	WT::OP50::20::heat_stress	a::3	3	a	3.37031	8.03438	1.97812	1.9875	WT		OP50			20	32		heat_stress				0	1		0	-0.023819
																						Earendil	20210719_AHS1_WT	Earendil_a::3	WT::OP50::20::heat_stress	a::3	3	a	3.37031	8.03438	1.97812	1.9875	WT		OP50			20	32		heat_stress				0	0		0	1.16368
																						Earendil	20210719_AHS1_WT	Earendil_a::3	WT::OP50::20::heat_stress	a::3	3	a	3.37031	8.03438	1.97812	1.9875	WT		OP50			20	32		heat_stress				0	1		0	0.830347
																						Earendil	20210719_AHS1_WT	Earendil_a::3	WT::OP50::20::heat_stress	a::3	3	a	3.37031	8.03438	1.97812	1.9875	WT		OP50			20	32		heat_stress				0	1		0	0.622014
																						Earendil	20210719_AHS1_WT	Earendil_a::3	WT::OP50::20::heat_stress	a::3	3	a	3.37031	8.03438	1.97812	1.9875	WT		OP50			20	32		heat_stress				0	1		0	-0.023819
																						Earendil	20210719_AHS1_WT	Earendil_a::3	WT::OP50::20::heat_stress	a::3	3	a	3.37031	8.03438	1.97812	1.9875	WT		OP50			20	32		heat_stress				0	0		0	1.03868
																						Earendil	20210719_AHS1_WT	Earendil_a::3	WT::OP50::20::heat_stress	a::3	3	a	3.37031	8.03438	1.97812	1.9875	WT		OP50			20	32		heat_stress				0	0		0	1.03868
																						Earendil	20210719_AHS1_WT	Earendil_a::3	WT::OP50::20::heat_stress	a::3	3	a	3.37031	8.03438	1.97812	1.9875	WT		OP50			20	32		heat_stress				0	1		0	-0.023819
																						Earendil	20210719_AHS1_WT	Earendil_a::3	WT::OP50::20::heat_stress	a::3	3	a	3.37031	8.03438	1.97812	1.9875	WT		OP50			20	32		heat_stress				0	0		0	0.955347
																						Earendil	20210719_AHS1_WT	Earendil_a::3	WT::OP50::20::heat_stress	a::3	3	a	3.37031	8.03438	1.97812	1.9875	WT		OP50			20	32		heat_stress				0	1	Extra worm from multiple-worm disambiguation	0	0.997014
																						Earendil	20210719_AHS1_WT	Earendil_a::3	WT::OP50::20::heat_stress	a::3	3	a	3.37031	8.03438	1.97812	1.9875	WT		OP50			20	32		heat_stress				0	1		0	0.622014
																						Earendil	20210719_AHS1_WT	Earendil_a::3	WT::OP50::20::heat_stress	a::3	3	a	3.37031	8.03438	1.97812	1.9875	WT		OP50			20	32		heat_stress				0	1		0	-0.002986
																						Earendil	20210719_AHS1_WT	Earendil_a::3	WT::OP50::20::heat_stress	a::3	3	a	3.37031	8.03438	1.97812	1.9875	WT		OP50			20	32		heat_stress				0	1		0	0.080347
																						Earendil	20210719_AHS1_WT	Earendil_a::3	WT::OP50::20::heat_stress	a::3	3	a	3.37031	8.03438	1.97812	1.9875	WT		OP50			20	32		heat_stress				0	0		0	0.038681
																						Earendil	20210719_AHS1_WT	Earendil_a::3	WT::OP50::20::heat_stress	a::3	3	a	3.37031	8.03438	1.97812	1.9875	WT		OP50			20	32		heat_stress				0	1		0	-0.023819
																						Earendil	20210719_AHS1_WT	Earendil_a::3	WT::OP50::20::heat_stress	a::3	3	a	3.37031	8.03438	1.97812	1.9875	WT		OP50			20	32		heat_stress				0	0		0	0.163681
																						Earendil	20210719_AHS1_WT	Earendil_a::3	WT::OP50::20::heat_stress	a::3	3	a	3.37031	8.03438	1.97812	1.9875	WT		OP50			20	32		heat_stress				0	1		0	0.913681
																						Earendil	20210719_AHS1_WT	Earendil_a::3	WT::OP50::20::heat_stress	a::3	3	a	3.37031	8.03438	1.97812	1.9875	WT		OP50			20	32		heat_stress				0	0		0	0.872014
																						Earendil	20210719_AHS1_WT	Earendil_a::3	WT::OP50::20::heat_stress	a::3	3	a	3.37031	8.03438	1.97812	1.9875	WT		OP50			20	32		heat_stress				0	0		0	0.913681
																						Earendil	20210719_AHS1_WT	Earendil_a::3	WT::OP50::20::heat_stress	a::3	3	a	3.37031	8.03438	1.97812	1.9875	WT		OP50			20	32		heat_stress				0	1		0	-0.023819
																						Earendil	20210719_AHS1_WT	Earendil_a::3	WT::OP50::20::heat_stress	a::3	3	a	3.37031	8.03438	1.97812	1.9875	WT		OP50			20	32		heat_stress				0	1		0	-0.002986
																						Earendil	20210719_AHS1_WT	Earendil_a::3	WT::OP50::20::heat_stress	a::3	3	a	3.37031	8.03438	1.97812	1.9875	WT		OP50			20	32		heat_stress				0	0		0	0.872014
																						Earendil	20210719_AHS1_WT	Earendil_a::3	WT::OP50::20::heat_stress	a::3	3	a	3.37031	8.03438	1.97812	1.9875	WT		OP50			20	32		heat_stress				0	0		0	0.705347
																						Earendil	20210719_AHS1_WT	Earendil_a::3	WT::OP50::20::heat_stress	a::3	3	a	3.37031	8.03438	1.97812	1.9875	WT		OP50			20	32		heat_stress				0	1		0	-0.023819
																						Earendil	20210719_AHS1_WT	Earendil_a::3	WT::OP50::20::heat_stress	a::3	3	a	3.37031	8.03438	1.97812	1.9875	WT		OP50			20	32		heat_stress				0	1		0	-0.002986
																						Earendil	20210719_AHS1_WT	Earendil_a::3	WT::OP50::20::heat_stress	a::3	3	a	3.37031	8.03438	1.97812	1.9875	WT		OP50			20	32		heat_stress				0	1		0	-0.023819
																						Earendil	20210719_AHS1_WT	Earendil_a::3	WT::OP50::20::heat_stress	a::3	3	a	3.37031	8.03438	1.97812	1.9875	WT		OP50			20	32		heat_stress				0	0		0	0.830347
																						Earendil	20210719_AHS1_WT	Earendil_a::3	WT::OP50::20::heat_stress	a::3	3	a	3.37031	8.03438	1.97812	1.9875	WT		OP50			20	32		heat_stress				0	1		0	0.830347
																						Earendil	20210719_AHS1_WT	Earendil_a::3	WT::OP50::20::heat_stress	a::3	3	a	3.37031	8.03438	1.97812	1.9875	WT		OP50			20	32		heat_stress				0	1		0	0.830347
																						Earendil	20210719_AHS1_WT	Earendil_a::3	WT::OP50::20::heat_stress	a::3	3	a	3.37031	8.03438	1.97812	1.9875	WT		OP50			20	32		heat_stress				0	0		0	0.788681
																						Earendil	20210719_AHS1_WT	Earendil_a::3	WT::OP50::20::heat_stress	a::3	3	a	3.37031	8.03438	1.97812	1.9875	WT		OP50			20	32		heat_stress				0	1		0	-0.002986
																						Earendil	20210719_AHS1_WT	Earendil_a::3	WT::OP50::20::heat_stress	a::3	3	a	3.37031	8.03438	1.97812	1.9875	WT		OP50			20	32		heat_stress				0	1		0	0.830347
																						Earendil	20210719_AHS1_WT	Earendil_a::3	WT::OP50::20::heat_stress	a::3	3	a	3.37031	8.03438	1.97812	1.9875	WT		OP50			20	32		heat_stress				0	1		0	0.122014
																						Earendil	20210719_AHS1_WT	Earendil_a::3	WT::OP50::20::heat_stress	a::3	3	a	3.37031	8.03438	1.97812	1.9875	WT		OP50			20	32		heat_stress				0	1		0	0.788681
																						Earendil	20210719_AHS1_WT	Earendil_a::3	WT::OP50::20::heat_stress	a::3	3	a	3.37031	8.03438	1.97812	1.9875	WT		OP50			20	32		heat_stress				0	1		0	0.788681
																						Earendil	20210719_AHS1_WT	Earendil_a::3	WT::OP50::20::heat_stress	a::3	3	a	3.37031	8.03438	1.97812	1.9875	WT		OP50			20	32		heat_stress				0	1		0	0.663681
																						Earendil	20210719_AHS1_WT	Earendil_a::3	WT::OP50::20::heat_stress	a::3	3	a	3.37031	8.03438	1.97812	1.9875	WT		OP50			20	32		heat_stress				0	1		0	0.788681
																						Earendil	20210719_AHS1_WT	Earendil_a::3	WT::OP50::20::heat_stress	a::3	3	a	3.37031	8.03438	1.97812	1.9875	WT		OP50			20	32		heat_stress				0	0		0	0.705347
																						Earendil	20210719_AHS1_WT	Earendil_a::3	WT::OP50::20::heat_stress	a::3	3	a	3.37031	8.03438	1.97812	1.9875	WT		OP50			20	32		heat_stress				0	1		0	0.788681
																						Earendil	20210719_AHS1_WT	Earendil_a::3	WT::OP50::20::heat_stress	a::3	3	a	3.37031	8.03438	1.97812	1.9875	WT		OP50			20	32		heat_stress				0	1		0	0.705347
																						Earendil	20210719_AHS1_WT	Earendil_a::3	WT::OP50::20::heat_stress	a::3	3	a	3.37031	8.03438	1.97812	1.9875	WT		OP50			20	32		heat_stress				0	1		0	-0.002986
																						Earendil	20210719_AHS1_WT	Earendil_a::3	WT::OP50::20::heat_stress	a::3	3	a	3.37031	8.03438	1.97812	1.9875	WT		OP50			20	32		heat_stress				0	1		0	0.080347
																						Earendil	20210719_AHS1_WT	Earendil_a::3	WT::OP50::20::heat_stress	a::3	3	a	3.37031	8.03438	1.97812	1.9875	WT		OP50			20	32		heat_stress				0	0		0	0.747014
																						Earendil	20210719_AHS1_WT	Earendil_a::3	WT::OP50::20::heat_stress	a::3	3	a	3.37031	8.03438	1.97812	1.9875	WT		OP50			20	32		heat_stress				0	0		0	0.580347
																						Earendil	20210719_AHS1_WT	Earendil_a::3	WT::OP50::20::heat_stress	a::3	3	a	3.37031	8.03438	1.97812	1.9875	WT		OP50			20	32		heat_stress				0	1		0	0.747014
																						Earendil	20210719_AHS1_WT	Earendil_a::3	WT::OP50::20::heat_stress	a::3	3	a	3.37031	8.03438	1.97812	1.9875	WT		OP50			20	32		heat_stress				0	0		0	0.747014
																						Earendil	20210719_AHS1_WT	Earendil_a::3	WT::OP50::20::heat_stress	a::3	3	a	3.37031	8.03438	1.97812	1.9875	WT		OP50			20	32		heat_stress				0	1		0	0.747014
																						Earendil	20210719_AHS1_WT	Earendil_a::3	WT::OP50::20::heat_stress	a::3	3	a	3.37031	8.03438	1.97812	1.9875	WT		OP50			20	32		heat_stress				0	1		0	0.747014
																						Earendil	20210719_AHS1_WT	Earendil_a::3	WT::OP50::20::heat_stress	a::3	3	a	3.37031	8.03438	1.97812	1.9875	WT		OP50			20	32		heat_stress				0	0		0	0.122014
																						Earendil	20210719_AHS1_WT	Earendil_a::3	WT::OP50::20::heat_stress	a::3	3	a	3.37031	8.03438	1.97812	1.9875	WT		OP50			20	32		heat_stress				0	1		0	0.705347
																						Earendil	20210719_AHS1_WT	Earendil_a::3	WT::OP50::20::heat_stress	a::3	3	a	3.37031	8.03438	1.97812	1.9875	WT		OP50			20	32		heat_stress				0	1		0	-0.023819
																						Earendil	20210719_AHS1_WT	Earendil_a::3	WT::OP50::20::heat_stress	a::3	3	a	3.37031	8.03438	1.97812	1.9875	WT		OP50			20	32		heat_stress				0	0		0	0.288681
																						Earendil	20210719_AHS1_WT	Earendil_a::3	WT::OP50::20::heat_stress	a::3	3	a	3.37031	8.03438	1.97812	1.9875	WT		OP50			20	32		heat_stress				0	1		0	-0.002986
																						Earendil	20210719_AHS1_WT	Earendil_a::3	WT::OP50::20::heat_stress	a::3	3	a	3.37031	8.03438	1.97812	1.9875	WT		OP50			20	32		heat_stress				0	0		0	0.663681
																						Earendil	20210719_AHS1_WT	Earendil_a::3	WT::OP50::20::heat_stress	a::3	3	a	3.37031	8.03438	1.97812	1.9875	WT		OP50			20	32		heat_stress				0	1		0	0.622014
																						Earendil	20210719_AHS1_WT	Earendil_a::3	WT::OP50::20::heat_stress	a::3	3	a	3.37031	8.03438	1.97812	1.9875	WT		OP50			20	32		heat_stress				0	1		0	0.163681
																						Earendil	20210719_AHS1_WT	Earendil_a::3	WT::OP50::20::heat_stress	a::3	3	a	3.37031	8.03438	1.97812	1.9875	WT		OP50			20	32		heat_stress				0	1		0	0.497014
																						Earendil	20210719_AHS1_WT	Earendil_a::3	WT::OP50::20::heat_stress	a::3	3	a	3.37031	8.03438	1.97812	1.9875	WT		OP50			20	32		heat_stress				0	0		0	0.622014
																						Earendil	20210719_AHS1_WT	Earendil_a::3	WT::OP50::20::heat_stress	a::3	3	a	3.37031	8.03438	1.97812	1.9875	WT		OP50			20	32		heat_stress				0	1		0	0.622014
																						Earendil	20210719_AHS1_WT	Earendil_a::3	WT::OP50::20::heat_stress	a::3	3	a	3.37031	8.03438	1.97812	1.9875	WT		OP50			20	32		heat_stress				0	1		0	0.622014
																						Earendil	20210719_AHS1_WT	Earendil_a::3	WT::OP50::20::heat_stress	a::3	3	a	3.37031	8.03438	1.97812	1.9875	WT		OP50			20	32		heat_stress				0	0		0	0.455347
																						Earendil	20210719_AHS1_WT	Earendil_a::3	WT::OP50::20::heat_stress	a::3	3	a	3.37031	8.03438	1.97812	1.9875	WT		OP50			20	32		heat_stress				0	1		0	0.413681
																						Earendil	20210719_AHS1_WT	Earendil_a::3	WT::OP50::20::heat_stress	a::3	3	a	3.37031	8.03438	1.97812	1.9875	WT		OP50			20	32		heat_stress				0	1		0	0.580347
																						Earendil	20210719_AHS1_WT	Earendil_a::3	WT::OP50::20::heat_stress	a::3	3	a	3.37031	8.03438	1.97812	1.9875	WT		OP50			20	32		heat_stress				0	1		0	-0.023819
																						Earendil	20210719_AHS1_WT	Earendil_a::3	WT::OP50::20::heat_stress	a::3	3	a	3.37031	8.03438	1.97812	1.9875	WT		OP50			20	32		heat_stress				0	1		0	0.038681
																						Earendil	20210719_AHS1_WT	Earendil_a::3	WT::OP50::20::heat_stress	a::3	3	a	3.37031	8.03438	1.97812	1.9875	WT		OP50			20	32		heat_stress				0	0		0	-0.002986
																						Earendil	20210719_AHS1_WT	Earendil_a::3	WT::OP50::20::heat_stress	a::3	3	a	3.37031	8.03438	1.97812	1.9875	WT		OP50			20	32		heat_stress				0	0		0	0.038681
																						Earendil	20210719_AHS1_WT	Earendil_a::3	WT::OP50::20::heat_stress	a::3	3	a	3.37031	8.03438	1.97812	1.9875	WT		OP50			20	32		heat_stress				0	0		0	0.538681
																						Earendil	20210719_AHS1_WT	Earendil_a::3	WT::OP50::20::heat_stress	a::3	3	a	3.37031	8.03438	1.97812	1.9875	WT		OP50			20	32		heat_stress				0	1		0	0.538681
																						Earendil	20210719_AHS1_WT	Earendil_a::3	WT::OP50::20::heat_stress	a::3	3	a	3.37031	8.03438	1.97812	1.9875	WT		OP50			20	32		heat_stress				0	1		0	0.497014
																						Earendil	20210719_AHS1_WT	Earendil_a::3	WT::OP50::20::heat_stress	a::3	3	a	3.37031	8.03438	1.97812	1.9875	WT		OP50			20	32		heat_stress				0	1		0	0.538681
																						Earendil	20210719_AHS1_WT	Earendil_a::3	WT::OP50::20::heat_stress	a::3	3	a	3.37031	8.03438	1.97812	1.9875	WT		OP50			20	32		heat_stress				0	1		0	0.538681
																						Earendil	20210719_AHS1_WT	Earendil_a::3	WT::OP50::20::heat_stress	a::3	3	a	3.37031	8.03438	1.97812	1.9875	WT		OP50			20	32		heat_stress				0	1		0	-0.023819
																						Earendil	20210719_AHS1_WT	Earendil_a::3	WT::OP50::20::heat_stress	a::3	3	a	3.37031	8.03438	1.97812	1.9875	WT		OP50			20	32		heat_stress				0	1		0	-0.002986
																						Earendil	20210719_AHS1_WT	Earendil_a::3	WT::OP50::20::heat_stress	a::3	3	a	3.37031	8.03438	1.97812	1.9875	WT		OP50			20	32		heat_stress				0	0		0	0.080347
																						Earendil	20210719_AHS1_WT	Earendil_a::3	WT::OP50::20::heat_stress	a::3	3	a	3.37031	8.03438	1.97812	1.9875	WT		OP50			20	32		heat_stress				0	0		0	0.497014
																						Earendil	20210719_AHS1_WT	Earendil_a::3	WT::OP50::20::heat_stress	a::3	3	a	3.37031	8.03438	1.97812	1.9875	WT		OP50			20	32		heat_stress				0	0		0	0.122014
																						Earendil	20210719_AHS1_WT	Earendil_a::3	WT::OP50::20::heat_stress	a::3	3	a	3.37031	8.03438	1.97812	1.9875	WT		OP50			20	32		heat_stress				0	1		0	-0.002986
																						Earendil	20210719_AHS1_WT	Earendil_a::3	WT::OP50::20::heat_stress	a::3	3	a	3.37031	8.03438	1.97812	1.9875	WT		OP50			20	32		heat_stress				0	1		0	-0.002986
																						Earendil	20210719_AHS1_WT	Earendil_a::3	WT::OP50::20::heat_stress	a::3	3	a	3.37031	8.03438	1.97812	1.9875	WT		OP50			20	32		heat_stress				0	0		0	-0.002986
																						Earendil	20210719_AHS1_WT	Earendil_a::3	WT::OP50::20::heat_stress	a::3	3	a	3.37031	8.03438	1.97812	1.9875	WT		OP50			20	32		heat_stress				0	1		0	-0.002986
																						Earendil	20210719_AHS1_WT	Earendil_a::3	WT::OP50::20::heat_stress	a::3	3	a	3.37031	8.03438	1.97812	1.9875	WT		OP50			20	32		heat_stress				0	1		0	0.330347
																						Earendil	20210719_AHS1_WT	Earendil_a::3	WT::OP50::20::heat_stress	a::3	3	a	3.37031	8.03438	1.97812	1.9875	WT		OP50			20	32		heat_stress				0	0		0	0.455347
																						Earendil	20210719_AHS1_WT	Earendil_a::3	WT::OP50::20::heat_stress	a::3	3	a	3.37031	8.03438	1.97812	1.9875	WT		OP50			20	32		heat_stress				0	0		0	0.288681
																						Earendil	20210719_AHS1_WT	Earendil_a::3	WT::OP50::20::heat_stress	a::3	3	a	3.37031	8.03438	1.97812	1.9875	WT		OP50			20	32		heat_stress				0	1		0	0.080347
																						Earendil	20210719_AHS1_WT	Earendil_a::3	WT::OP50::20::heat_stress	a::3	3	a	3.37031	8.03438	1.97812	1.9875	WT		OP50			20	32		heat_stress				0	1		0	-0.023819
																						Earendil	20210719_AHS1_WT	Earendil_a::3	WT::OP50::20::heat_stress	a::3	3	a	3.37031	8.03438	1.97812	1.9875	WT		OP50			20	32		heat_stress				0	1		0	0.080347
																						Earendil	20210719_AHS1_WT	Earendil_a::3	WT::OP50::20::heat_stress	a::3	3	a	3.37031	8.03438	1.97812	1.9875	WT		OP50			20	32		heat_stress				0	0		0	0.080347
																						Earendil	20210719_AHS1_WT	Earendil_a::3	WT::OP50::20::heat_stress	a::3	3	a	3.37031	8.03438	1.97812	1.9875	WT		OP50			20	32		heat_stress				0	1		0	0.330347
																						Earendil	20210719_AHS1_WT	Earendil_a::3	WT::OP50::20::heat_stress	a::3	3	a	3.37031	8.03438	1.97812	1.9875	WT		OP50			20	32		heat_stress				0	1		0	0.372014
																						Earendil	20210719_AHS1_WT	Earendil_a::3	WT::OP50::20::heat_stress	a::3	3	a	3.37031	8.03438	1.97812	1.9875	WT		OP50			20	32		heat_stress				0	1		0	0.122014
																						Earendil	20210719_AHS1_WT	Earendil_a::3	WT::OP50::20::heat_stress	a::3	3	a	3.37031	8.03438	1.97812	1.9875	WT		OP50			20	32		heat_stress				0	0		0	0.205347
																						Earendil	20210719_AHS1_WT	Earendil_a::3	WT::OP50::20::heat_stress	a::3	3	a	3.37031	8.03438	1.97812	1.9875	WT		OP50			20	32		heat_stress				0	1		0	0.330347
																						Earendil	20210719_AHS1_WT	Earendil_a::3	WT::OP50::20::heat_stress	a::3	3	a	3.37031	8.03438	1.97812	1.9875	WT		OP50			20	32		heat_stress				0	1		0	0.038681
																						Earendil	20210719_AHS1_WT	Earendil_a::3	WT::OP50::20::heat_stress	a::3	3	a	3.37031	8.03438	1.97812	1.9875	WT		OP50			20	32		heat_stress				0	1		0	0.038681
																						Earendil	20210719_AHS1_WT	Earendil_a::3	WT::OP50::20::heat_stress	a::3	3	a	3.37031	8.03438	1.97812	1.9875	WT		OP50			20	32		heat_stress				0	1		0	0.080347
																						Earendil	20210719_AHS1_WT	Earendil_a::3	WT::OP50::20::heat_stress	a::3	3	a	3.37031	8.03438	1.97812	1.9875	WT		OP50			20	32		heat_stress				0	1		0	0.205347
																						Earendil	20210719_AHS1_WT	Earendil_a::3	WT::OP50::20::heat_stress	a::3	3	a	3.37031	8.03438	1.97812	1.9875	WT		OP50			20	32		heat_stress				0	1		0	0.080347
																						Earendil	20210719_AHS1_WT	Earendil_a::3	WT::OP50::20::heat_stress	a::3	3	a	3.37031	8.03438	1.97812	1.9875	WT		OP50			20	32		heat_stress				0	1		0	0.122014
																						Earendil	20210719_AHS1_WT	Earendil_a::3	WT::OP50::20::heat_stress	a::3	3	a	3.37031	8.03438	1.97812	1.9875	WT		OP50			20	32		heat_stress				0	1		0	0.038681
																						Earendil	20210719_AHS1_WT	Earendil_a::3	WT::OP50::20::heat_stress	a::3	3	a	3.37031	8.03438	1.97812	1.9875	WT		OP50			20	32		heat_stress				0	1		0	0.122014
																						Earendil	20210719_AHS1_WT	Earendil_a::3	WT::OP50::20::heat_stress	a::3	3	a	3.37031	8.03438	1.97812	1.9875	WT		OP50			20	32		heat_stress				0	1		0	-0.023819
																						Earendil	20210719_AHS1_WT	Earendil_a::3	WT::OP50::20::heat_stress	a::3	3	a	3.37031	8.03438	1.97812	1.9875	WT		OP50			20	32		heat_stress				0	0		0	-0.023819
																						Earendil	20210719_AHS1_WT	Earendil_a::3	WT::OP50::20::heat_stress	a::3	3	a	3.37031	8.03438	1.97812	1.9875	WT		OP50			20	32		heat_stress				0	1		0	-0.023819
																						Earendil	20210719_AHS1_WT	Earendil_a::3	WT::OP50::20::heat_stress	a::3	3	a	3.37031	8.03438	1.97812	1.9875	WT		OP50			20	32		heat_stress				0	1		0	-0.023819
																						Earendil	20210719_AHS1_WT	Earendil_a::3	WT::OP50::20::heat_stress	a::3	3	a	3.37031	8.03438	1.97812	1.9875	WT		OP50			20	32		heat_stress				0	1		0	0.080347
																						Earendil	20210719_AHS1_WT	Earendil_a::3	WT::OP50::20::heat_stress	a::3	3	a	3.37031	8.03438	1.97812	1.9875	WT		OP50			20	32		heat_stress				0	1		0	-0.023819
																						Earendil	20210719_AHS1_WT	Earendil_a::3	WT::OP50::20::heat_stress	a::3	3	a	3.37031	8.03438	1.97812	1.9875	WT		OP50			20	32		heat_stress				0	1		0	-0.023819
																						Earendil	20210719_AHS1_WT	Earendil_a::3	WT::OP50::20::heat_stress	a::3	3	a	3.37031	8.03438	1.97812	1.9875	WT		OP50			20	32		heat_stress				0	1		0	-0.023819
																						Earendil	20210719_AHS1_WT	Earendil_a::3	WT::OP50::20::heat_stress	a::3	3	a	3.37031	8.03438	1.97812	1.9875	WT		OP50			20	32		heat_stress				0	1		0	0.038681
																						Earendil	20210719_AHS1_WT	Earendil_a::3	WT::OP50::20::heat_stress	a::3	3	a	3.37031	8.03438	1.97812	1.9875	WT		OP50			20	32		heat_stress				0	1		0	-0.023819
																						Earendil	20210719_AHS1_WT	Earendil_a::3	WT::OP50::20::heat_stress	a::3	3	a	3.37031	8.03438	1.97812	1.9875	WT		OP50			20	32		heat_stress				0	1		0	-0.023819
																						Earendil	20210719_AHS1_WT	Earendil_a::3	WT::OP50::20::heat_stress	a::3	3	a	3.37031	8.03438	1.97812	1.9875	WT		OP50			20	32		heat_stress				0	1		0	-0.002986
																						Earendil	20210719_AHS1_WT	Earendil_a::3	WT::OP50::20::heat_stress	a::3	3	a	3.37031	8.03438	1.97812	1.9875	WT		OP50			20	32		heat_stress				0	1		0	-0.023819
																						Earendil	20210719_AHS1_WT	Earendil_a::3	WT::OP50::20::heat_stress	a::3	3	a	3.37031	8.03438	1.97812	1.9875	WT		OP50			20	32		heat_stress				0	0		0	-0.002986
																						Earendil	20210719_AHS1_WT	Earendil_a::3	WT::OP50::20::heat_stress	a::3	3	a	3.37031	8.03438	1.97812	1.9875	WT		OP50			20	32		heat_stress				0	0		0	-0.002986
																						Earendil	20210719_AHS1_WT	Earendil_a::3	WT::OP50::20::heat_stress	a::3	3	a	3.37031	8.03438	1.97812	1.9875	WT		OP50			20	32		heat_stress				0	1		0	-0.023819
																						Earendil	20210719_AHS1_WT	Earendil_a::3	WT::OP50::20::heat_stress	a::3	3	a	3.37031	8.03438	1.97812	1.9875	WT		OP50			20	32		heat_stress				0	1		0	-0.023819
																						Earendil	20210719_AHS1_WT	Earendil_a::3	WT::OP50::20::heat_stress	a::3	3	a	3.37031	8.03438	1.97812	1.9875	WT		OP50			20	32		heat_stress				0	1		0	-0.023819
																						Earendil	20210719_AHS1_WT	Earendil_a::3	WT::OP50::20::heat_stress	a::3	3	a	3.37031	8.03438	1.97812	1.9875	WT		OP50			20	32		heat_stress				0	0		0	-0.023819
																						Earendil	20210719_AHS1_WT	Earendil_a::3	WT::OP50::20::heat_stress	a::3	3	a	3.37031	8.03438	1.97812	1.9875	WT		OP50			20	32		heat_stress				0	1		0	-0.023819
																						Earendil	20210719_AHS1_WT	Earendil_a::3	WT::OP50::20::heat_stress	a::3	3	a	3.37031	8.03438	1.97812	1.9875	WT		OP50			20	32		heat_stress				0	1		0	-0.023819
																						Earendil	20210719_AHS1_WT	Earendil_a::3	WT::OP50::20::heat_stress	a::3	3	a	3.37031	8.03438	1.97812	1.9875	WT		OP50			20	32		heat_stress				0	1		0	0.080347
																						Earendil	20210719_AHS1_WT	Earendil_a::3	WT::OP50::20::heat_stress	a::3	3	a	3.37031	8.03438	1.97812	1.9875	WT		OP50			20	32		heat_stress				0	0		0	-0.002986
																						Earendil	20210719_AHS1_WT	Earendil_a::3	WT::OP50::20::heat_stress	a::3	3	a	3.37031	8.03438	1.97812	1.9875	WT		OP50			20	32		heat_stress				0	1		0	0.080347
																						Earendil	20210719_AHS1_WT	Earendil_a::3	WT::OP50::20::heat_stress	a::3	3	a	3.37031	8.03438	1.97812	1.9875	WT		OP50			20	32		heat_stress				0	0		0	0.080347
																						Earendil	20210719_AHS1_WT	Earendil_a::3	WT::OP50::20::heat_stress	a::3	3	a	3.37031	8.03438	1.97812	1.9875	WT		OP50			20	32		heat_stress				0	1		0	-0.023819
																						Earendil	20210719_AHS1_WT	Earendil_a::3	WT::OP50::20::heat_stress	a::3	3	a	3.37031	8.03438	1.97812	1.9875	WT		OP50			20	32		heat_stress				0	1		0	0.038681
																						Earendil	20210719_AHS1_WT	Earendil_a::3	WT::OP50::20::heat_stress	a::3	3	a	3.37031	8.03438	1.97812	1.9875	WT		OP50			20	32		heat_stress				0	1		0	-0.023819
																						Earendil	20210719_AHS1_WT	Earendil_a::3	WT::OP50::20::heat_stress	a::3	3	a	3.37031	8.03438	1.97812	1.9875	WT		OP50			20	32		heat_stress				0	1		0	0.122014
																						Earendil	20210719_AHS1_WT	Earendil_a::3	WT::OP50::20::heat_stress	a::3	3	a	3.37031	8.03438	1.97812	1.9875	WT		OP50			20	32		heat_stress				0	1		0	0.038681
																						Earendil	20210719_AHS1_WT	Earendil_a::3	WT::OP50::20::heat_stress	a::3	3	a	3.37031	8.03438	1.97812	1.9875	WT		OP50			20	32		heat_stress				0	1		0	-0.002986
																						Earendil	20210719_AHS1_WT	Earendil_a::3	WT::OP50::20::heat_stress	a::3	3	a	3.37031	8.03438	1.97812	1.9875	WT		OP50			20	32		heat_stress				0	1		0	-0.002986
																						Earendil	20210719_AHS1_WT	Earendil_a::3	WT::OP50::20::heat_stress	a::3	3	a	3.37031	8.03438	1.97812	1.9875	WT		OP50			20	32		heat_stress				0	1		0	-0.023819
																						Earendil	20210719_AHS1_WT	Earendil_a::3	WT::OP50::20::heat_stress	a::3	3	a	3.37031	8.03438	1.97812	1.9875	WT		OP50			20	32		heat_stress				0	1		0	-0.002986
																						Earendil	20210719_AHS1_WT	Earendil_a::3	WT::OP50::20::heat_stress	a::3	3	a	3.37031	8.03438	1.97812	1.9875	WT		OP50			20	32		heat_stress				0	1		0	-0.002986
																						Earendil	20210719_AHS1_WT	Earendil_a::3	WT::OP50::20::heat_stress	a::3	3	a	3.37031	8.03438	1.97812	1.9875	WT		OP50			20	32		heat_stress				0	1		0	-0.023819
																						Earendil	20210719_AHS1_WT	Earendil_a::3	WT::OP50::20::heat_stress	a::3	3	a	3.37031	8.03438	1.97812	1.9875	WT		OP50			20	32		heat_stress				0	1		0	0.080347
																						Earendil	20210719_AHS1_WT	Earendil_a::3	WT::OP50::20::heat_stress	a::3	3	a	3.37031	8.03438	1.97812	1.9875	WT		OP50			20	32		heat_stress				0	1		0	-0.023819
																						Earendil	20210719_AHS1_WT	Earendil_a::3	WT::OP50::20::heat_stress	a::3	3	a	3.37031	8.03438	1.97812	1.9875	WT		OP50			20	32		heat_stress				0	1		0	0.038681
																						Earendil	20210719_AHS1_WT	Earendil_a::3	WT::OP50::20::heat_stress	a::3	3	a	3.37031	8.03438	1.97812	1.9875	WT		OP50			20	32		heat_stress				0	1		0	0.038681
																						Earendil	20210719_AHS1_WT	Earendil_a::3	WT::OP50::20::heat_stress	a::3	3	a	3.37031	8.03438	1.97812	1.9875	WT		OP50			20	32		heat_stress				0	1		0	-0.023819
																						Earendil	20210719_AHS1_WT	Earendil_a::3	WT::OP50::20::heat_stress	a::3	3	a	3.37031	8.03438	1.97812	1.9875	WT		OP50			20	32		heat_stress				0	1		0	-0.023819
																						Earendil	20210719_AHS1_WT	Earendil_a::3	WT::OP50::20::heat_stress	a::3	3	a	3.37031	8.03438	1.97812	1.9875	WT		OP50			20	32		heat_stress				0	1		0	-0.023819
																						Earendil	20210719_AHS1_WT	Earendil_a::3	WT::OP50::20::heat_stress	a::3	3	a	3.37031	8.03438	1.97812	1.9875	WT		OP50			20	32		heat_stress				0	1		0	-0.023819
																						Earendil	20210719_AHS1_WT	Earendil_a::3	WT::OP50::20::heat_stress	a::3	3	a	3.37031	8.03438	1.97812	1.9875	WT		OP50			20	32		heat_stress				0	1		0	0.080347
																						Earendil	20210719_AHS1_WT	Earendil_a::3	WT::OP50::20::heat_stress	a::3	3	a	3.37031	8.03438	1.97812	1.9875	WT		OP50			20	32		heat_stress				0	1		0	-0.002986
																						Earendil	20210719_AHS1_WT	Earendil_a::3	WT::OP50::20::heat_stress	a::3	3	a	3.37031	8.03438	1.97812	1.9875	WT		OP50			20	32		heat_stress				0	1		0	-0.023819
																						Earendil	20210719_AHS1_WT	Earendil_a::3	WT::OP50::20::heat_stress	a::3	3	a	3.37031	8.03438	1.97812	1.9875	WT		OP50			20	32		heat_stress				0	1		0	-0.023819
																						Earendil	20210719_AHS1_WT	Earendil_a::3	WT::OP50::20::heat_stress	a::3	3	a	3.37031	8.03438	1.97812	1.9875	WT		OP50			20	32		heat_stress				0	0		0	0.080347
																						Earendil	20210719_AHS1_WT	Earendil_a::3	WT::OP50::20::heat_stress	a::3	3	a	3.37031	8.03438	1.97812	1.9875	WT		OP50			20	32		heat_stress				0	1		0	0.080347
																						Earendil	20210719_AHS1_WT	Earendil_a::3	WT::OP50::20::heat_stress	a::3	3	a	3.37031	8.03438	1.97812	1.9875	WT		OP50			20	32		heat_stress				0	0		0	-0.002986
																						Earendil	20210719_AHS1_WT	Earendil_a::3	WT::OP50::20::heat_stress	a::3	3	a	3.37031	8.03438	1.97812	1.9875	WT		OP50			20	32		heat_stress				0	1		0	-0.023819
																						Earendil	20210719_AHS1_WT	Earendil_a::3	WT::OP50::20::heat_stress	a::3	3	a	3.37031	8.03438	1.97812	1.9875	WT		OP50			20	32		heat_stress				0	1		0	-0.023819
																						Earendil	20210719_AHS1_WT	Earendil_a::3	WT::OP50::20::heat_stress	a::3	3	a	3.37031	8.03438	1.97812	1.9875	WT		OP50			20	32		heat_stress				0	1		0	-0.023819
																						Earendil	20210719_AHS1_WT	Earendil_a::3	WT::OP50::20::heat_stress	a::3	3	a	3.37031	8.03438	1.97812	1.9875	WT		OP50			20	32		heat_stress				0	0		0	0.080347
																						Earendil	20210719_AHS1_WT	Earendil_a::3	WT::OP50::20::heat_stress	a::3	3	a	3.37031	8.03438	1.97812	1.9875	WT		OP50			20	32		heat_stress				0	1		0	-0.002986
																						Earendil	20210719_AHS1_WT	Earendil_a::3	WT::OP50::20::heat_stress	a::3	3	a	3.37031	8.03438	1.97812	1.9875	WT		OP50			20	32		heat_stress				0	1		0	-0.023819
																						Earendil	20210719_AHS1_WT	Earendil_a::3	WT::OP50::20::heat_stress	a::3	3	a	3.37031	8.03438	1.97812	1.9875	WT		OP50			20	32		heat_stress				0	1		0	0.080347
																						Earendil	20210719_AHS1_WT	Earendil_a::3	WT::OP50::20::heat_stress	a::3	3	a	3.37031	8.03438	1.97812	1.9875	WT		OP50			20	32		heat_stress				0	1		0	-0.023819
																						Earendil	20210719_AHS1_WT	Earendil_a::3	WT::OP50::20::heat_stress	a::3	3	a	3.37031	8.03438	1.97812	1.9875	WT		OP50			20	32		heat_stress				0	1		0	-0.023819
																						Earendil	20210719_AHS1_WT	Earendil_a::3	WT::OP50::20::heat_stress	a::3	3	a	3.37031	8.03438	1.97812	1.9875	WT		OP50			20	32		heat_stress				0	1		0	-0.023819
																						Earendil	20210719_AHS1_WT	Earendil_a::3	WT::OP50::20::heat_stress	a::3	3	a	3.37031	8.03438	1.97812	1.9875	WT		OP50			20	32		heat_stress				0	1		0	-0.023819
																						Earendil	20210719_AHS1_WT	Earendil_a::3	WT::OP50::20::heat_stress	a::3	3	a	3.37031	8.03438	1.97812	1.9875	WT		OP50			20	32		heat_stress				0	1		0	-0.002986
																						Earendil	20210719_AHS1_WT	Earendil_a::3	WT::OP50::20::heat_stress	a::3	3	a	3.37031	8.03438	1.97812	1.9875	WT		OP50			20	32		heat_stress				0	0		0	-0.023819
																						Earendil	20210719_AHS1_WT	Earendil_a::3	WT::OP50::20::heat_stress	a::3	3	a	3.37031	8.03438	1.97812	1.9875	WT		OP50			20	32		heat_stress				0	1		0	-0.002986
																						Earendil	20210719_AHS1_WT	Earendil_a::3	WT::OP50::20::heat_stress	a::3	3	a	3.37031	8.03438	1.97812	1.9875	WT		OP50			20	32		heat_stress				0	1		0	-0.002986
																						Earendil	20210719_AHS1_WT	Earendil_a::3	WT::OP50::20::heat_stress	a::3	3	a	3.37031	8.03438	1.97812	1.9875	WT		OP50			20	32		heat_stress				0	1		0	-0.023819
																						Earendil	20210719_AHS1_WT	Earendil_a::3	WT::OP50::20::heat_stress	a::3	3	a	3.37031	8.03438	1.97812	1.9875	WT		OP50			20	32		heat_stress				0	1		0	-0.023819
																						Earendil	20210719_AHS1_WT	Earendil_a::3	WT::OP50::20::heat_stress	a::3	3	a	3.37031	8.03438	1.97812	1.9875	WT		OP50			20	32		heat_stress				0	1		0	-0.023819
																						Earendil	20210719_AHS1_WT	Earendil_a::3	WT::OP50::20::heat_stress	a::3	3	a	3.37031	8.03438	1.97812	1.9875	WT		OP50			20	32		heat_stress				0	1		0	-0.023819
																						Earendil	20210719_AHS1_WT	Earendil_a::3	WT::OP50::20::heat_stress	a::3	3	a	3.37031	8.03438	1.97812	1.9875	WT		OP50			20	32		heat_stress				0	1		0	0.080347
																						Earendil	20210719_AHS1_WT	Earendil_a::3	WT::OP50::20::heat_stress	a::3	3	a	3.37031	8.03438	1.97812	1.9875	WT		OP50			20	32		heat_stress				0	1		0	-0.023819
																						Earendil	20210719_AHS1_WT	Earendil_a::3	WT::OP50::20::heat_stress	a::3	3	a	3.37031	8.03438	1.97812	1.9875	WT		OP50			20	32		heat_stress				0	1		0	0.080347
																						Earendil	20210719_AHS1_WT	Earendil_a::3	WT::OP50::20::heat_stress	a::3	3	a	3.37031	8.03438	1.97812	1.9875	WT		OP50			20	32		heat_stress				0	1		0	0.288681
																						Earendil	20210719_AHS1_WT	Earendil_a::3	WT::OP50::20::heat_stress	a::3	3	a	3.37031	8.03438	1.97812	1.9875	WT		OP50			20	32		heat_stress				0	1		0	0.080347
																						Earendil	20210719_AHS1_WT	Earendil_a::3	WT::OP50::20::heat_stress	a::3	3	a	3.37031	8.03438	1.97812	1.9875	WT		OP50			20	32		heat_stress				0	1		0	-0.002986
																						Earendil	20210719_AHS1_WT	Earendil_a::3	WT::OP50::20::heat_stress	a::3	3	a	3.37031	8.03438	1.97812	1.9875	WT		OP50			20	32		heat_stress				0	0		0	0.163681
																						Earendil	20210719_AHS1_WT	Earendil_a::3	WT::OP50::20::heat_stress	a::3	3	a	3.37031	8.03438	1.97812	1.9875	WT		OP50			20	32		heat_stress				0	1		0	-0.002986
																						Earendil	20210719_AHS1_WT	Earendil_a::3	WT::OP50::20::heat_stress	a::3	3	a	3.37031	8.03438	1.97812	1.9875	WT		OP50			20	32		heat_stress				0	1		0	0.038681
																						Earendil	20210719_AHS1_WT	Earendil_a::3	WT::OP50::20::heat_stress	a::3	3	a	3.37031	8.03438	1.97812	1.9875	WT		OP50			20	32		heat_stress				0	1		0	0.038681
																						Earendil	20210719_AHS1_WT	Earendil_a::3	WT::OP50::20::heat_stress	a::3	3	a	3.37031	8.03438	1.97812	1.9875	WT		OP50			20	32		heat_stress				0	1		0	0.038681
																						Earendil	20210719_AHS1_WT	Earendil_a::3	WT::OP50::20::heat_stress	a::3	3	a	3.37031	8.03438	1.97812	1.9875	WT		OP50			20	32		heat_stress				0	1		0	0.538681
																						Earendil	20210719_AHS1_WT	Earendil_a::3	WT::OP50::20::heat_stress	a::3	3	a	3.37031	8.03438	1.97812	1.9875	WT		OP50			20	32		heat_stress				0	0		0	0.497014
																						Earendil	20210719_AHS1_WT	Earendil_a::3	WT::OP50::20::heat_stress	a::3	3	a	3.37031	8.03438	1.97812	1.9875	WT		OP50			20	32		heat_stress				0	1		0	0.122014
																						Earendil	20210719_AHS1_WT	Earendil_a::3	WT::OP50::20::heat_stress	a::3	3	a	3.37031	8.03438	1.97812	1.9875	WT		OP50			20	32		heat_stress				0	1		0	0.538681
																						Earendil	20210719_AHS1_WT	Earendil_a::3	WT::OP50::20::heat_stress	a::3	3	a	3.37031	8.03438	1.97812	1.9875	WT		OP50			20	32		heat_stress				0	1		0	-0.023819
																						Earendil	20210719_AHS1_WT	Earendil_a::3	WT::OP50::20::heat_stress	a::3	3	a	3.37031	8.03438	1.97812	1.9875	WT		OP50			20	32		heat_stress				0	0		0	0.247014
																						Earendil	20210719_AHS1_WT	Earendil_a::3	WT::OP50::20::heat_stress	a::3	3	a	3.37031	8.03438	1.97812	1.9875	WT		OP50			20	32		heat_stress				0	1		0	-0.002986
																						Earendil	20210719_AHS1_WT	Earendil_a::3	WT::OP50::20::heat_stress	a::3	3	a	3.37031	8.03438	1.97812	1.9875	WT		OP50			20	32		heat_stress				0	1		0	-0.023819
																						Earendil	20210719_AHS1_WT	Earendil_a::3	WT::OP50::20::heat_stress	a::3	3	a	3.37031	8.03438	1.97812	1.9875	WT		OP50			20	32		heat_stress				0	1		0	-0.002986
																						Earendil	20210719_AHS1_WT	Earendil_a::3	WT::OP50::20::heat_stress	a::3	3	a	3.37031	8.03438	1.97812	1.9875	WT		OP50			20	32		heat_stress				0	1		0	0.038681
																						Earendil	20210719_AHS1_WT	Earendil_a::3	WT::OP50::20::heat_stress	a::3	3	a	3.37031	8.03438	1.97812	1.9875	WT		OP50			20	32		heat_stress				0	1		0	0.788681
																						Earendil	20210719_AHS1_WT	Earendil_a::3	WT::OP50::20::heat_stress	a::3	3	a	3.37031	8.03438	1.97812	1.9875	WT		OP50			20	32		heat_stress				0	1		0	0.080347
																						Earendil	20210719_AHS1_WT	Earendil_a::3	WT::OP50::20::heat_stress	a::3	3	a	3.37031	8.03438	1.97812	1.9875	WT		OP50			20	32		heat_stress				0	1		0	-0.023819
																						Earendil	20210719_AHS1_WT	Earendil_a::3	WT::OP50::20::heat_stress	a::3	3	a	3.37031	8.03438	1.97812	1.9875	WT		OP50			20	32		heat_stress				0	1		0	0.538681
																						Earendil	20210719_AHS1_WT	Earendil_a::3	WT::OP50::20::heat_stress	a::3	3	a	3.37031	8.03438	1.97812	1.9875	WT		OP50			20	32		heat_stress				0	1		0	-0.002986
																						Earendil	20210719_AHS1_WT	Earendil_a::3	WT::OP50::20::heat_stress	a::3	3	a	3.37031	8.03438	1.97812	1.9875	WT		OP50			20	32		heat_stress				0	1	Extra worm from multiple-worm disambiguation	0	-0.002986
																						Earendil	20210719_AHS1_WT	Earendil_a::3	WT::OP50::20::heat_stress	a::3	3	a	3.37031	8.03438	1.97812	1.9875	WT		OP50			20	32		heat_stress				0	1		0	-0.002986
																						Earendil	20210719_AHS1_WT	Earendil_a::3	WT::OP50::20::heat_stress	a::3	3	a	3.37031	8.03438	1.97812	1.9875	WT		OP50			20	32		heat_stress				0	1		0	0.080347
																						Earendil	20210719_AHS1_WT	Earendil_a::3	WT::OP50::20::heat_stress	a::3	3	a	3.37031	8.03438	1.97812	1.9875	WT		OP50			20	32		heat_stress				0	1	Extra worm from multiple-worm disambiguation	0	0.038681
																						Earendil	20210719_AHS1_WT	Earendil_a::3	WT::OP50::20::heat_stress	a::3	3	a	3.37031	8.03438	1.97812	1.9875	WT		OP50			20	32		heat_stress				0	1		0	-0.002986
																						Earendil	20210719_AHS1_WT	Earendil_a::3	WT::OP50::20::heat_stress	a::3	3	a	3.37031	8.03438	1.97812	1.9875	WT		OP50			20	32		heat_stress				0	1		0	0.330347
																						Earendil	20210719_AHS1_WT	Earendil_a::3	WT::OP50::20::heat_stress	a::3	3	a	3.37031	8.03438	1.97812	1.9875	WT		OP50			20	32		heat_stress				0	1		0	1.87201
																						Earendil	20210719_AHS1_WT	Earendil_a::3	WT::OP50::20::heat_stress	a::3	3	a	3.37031	8.03438	1.97812	1.9875	WT		OP50			20	32		heat_stress				0	1		0	0.497014
																						Earendil	20210719_AHS1_WT	Earendil_a::3	WT::OP50::20::heat_stress	a::3	3	a	3.37031	8.03438	1.97812	1.9875	WT		OP50			20	32		heat_stress				0	1		0	-0.002986
																						Earendil	20210719_AHS1_WT	Earendil_a::3	WT::OP50::20::heat_stress	a::3	3	a	3.37031	8.03438	1.97812	1.9875	WT		OP50			20	32		heat_stress				0	1		0	0.622014
																						Earendil	20210719_AHS1_WT	Earendil_a::3	WT::OP50::20::heat_stress	a::3	3	a	3.37031	8.03438	1.97812	1.9875	WT		OP50			20	32		heat_stress				0	1		0	0.080347
																						Earendil	20210719_AHS1_WT	Earendil_a::3	WT::OP50::20::heat_stress	a::3	3	a	3.37031	8.03438	1.97812	1.9875	WT		OP50			20	32		heat_stress				0	1		0	0.663681
																						Earendil	20210719_AHS1_WT	Earendil_a::3	WT::OP50::20::heat_stress	a::3	3	a	3.37031	8.03438	1.97812	1.9875	WT		OP50			20	32		heat_stress				0	1		0	0.538681
																						Earendil	20210719_AHS1_WT	Earendil_a::3	WT::OP50::20::heat_stress	a::3	3	a	3.37031	8.03438	1.97812	1.9875	WT		OP50			20	32		heat_stress				0	1		0	0.080347
																						Earendil	20210719_AHS1_WT	Earendil_a::3	WT::OP50::20::heat_stress	a::3	3	a	3.37031	8.03438	1.97812	1.9875	WT		OP50			20	32		heat_stress				0	0		0	0.455347
																						Earendil	20210719_AHS1_WT	Earendil_a::3	WT::OP50::20::heat_stress	a::3	3	a	3.37031	8.03438	1.97812	1.9875	WT		OP50			20	32		heat_stress				0	1		0	-0.002986
																						Earendil	20210719_AHS1_WT	Earendil_a::3	WT::OP50::20::heat_stress	a::3	3	a	3.37031	8.03438	1.97812	1.9875	WT		OP50			20	32		heat_stress				0	1		0	0.413681
																						Earendil	20210719_AHS1_WT	Earendil_a::3	WT::OP50::20::heat_stress	a::3	3	a	3.37031	8.03438	1.97812	1.9875	WT		OP50			20	32		heat_stress				0	0		0	0.163681
																						Earendil	20210719_AHS1_WT	Earendil_a::3	WT::OP50::20::heat_stress	a::3	3	a	3.37031	8.03438	1.97812	1.9875	WT		OP50			20	32		heat_stress				0	0		0	0.163681
																						Earendil	20210719_AHS1_WT	Earendil_a::3	WT::OP50::20::heat_stress	a::3	3	a	3.37031	8.03438	1.97812	1.9875	WT		OP50			20	32		heat_stress				0	1	Extra worm from multiple-worm disambiguation	0	0.288681
																						Earendil	20210719_AHS1_WT	Earendil_a::3	WT::OP50::20::heat_stress	a::3	3	a	3.37031	8.03438	1.97812	1.9875	WT		OP50			20	32		heat_stress				0	0		0	0.122014
																						Earendil	20210719_AHS1_WT	Earendil_a::3	WT::OP50::20::heat_stress	a::3	3	a	3.37031	8.03438	1.97812	1.9875	WT		OP50			20	32		heat_stress				0	0		0	0.122014
																						TRIAL #2
																						Device	Experiment	Plate Name	Animal Description	Plate Position Name	Plate Row	Plate Column	Plate Center Position X (inches)	Plate Center Position Y (inches)	Plate Size X (inches)	Plate Size Y (inches)	Strain	Genotype	Condition 1	Condition 2	Condition 3	Culturing Temperature	Experiment Temperature	Food Source	Environmental Conditions	Incubator Name	Incubator Column	Incubator Shelf	Censored	Excluded	Special Flag	Size of by-hand annotated cluster	Machine Fast Movement Cessation Age (Days)
																						major	20211004_AHS3_col99	major_a::0	col99::20::OP50::heat_stress	a::0	0	a	2.81719	1.28281	2.02813	1.99063	col99					20	32	OP50	heat_stress				0	0		0	0.314213
																						major	20211004_AHS3_col99	major_a::0	col99::20::OP50::heat_stress	a::0	0	a	2.81719	1.28281	2.02813	1.99063	col99					20	32	OP50	heat_stress				0	1		0	1.85588
																						major	20211004_AHS3_col99	major_a::0	col99::20::OP50::heat_stress	a::0	0	a	2.81719	1.28281	2.02813	1.99063	col99					20	32	OP50	heat_stress				0	1	Extra worm from multiple-worm disambiguation	0	0.564213
																						major	20211004_AHS3_col99	major_a::0	col99::20::OP50::heat_stress	a::0	0	a	2.81719	1.28281	2.02813	1.99063	col99					20	32	OP50	heat_stress				0	0		0	0.522546
																						major	20211004_AHS3_col99	major_a::0	col99::20::OP50::heat_stress	a::0	0	a	2.81719	1.28281	2.02813	1.99063	col99					20	32	OP50	heat_stress				0	0		0	0.48088
																						major	20211004_AHS3_col99	major_a::0	col99::20::OP50::heat_stress	a::0	0	a	2.81719	1.28281	2.02813	1.99063	col99					20	32	OP50	heat_stress				0	0		0	0.48088
																						major	20211004_AHS3_col99	major_a::0	col99::20::OP50::heat_stress	a::0	0	a	2.81719	1.28281	2.02813	1.99063	col99					20	32	OP50	heat_stress				0	0		0	0.48088
																						major	20211004_AHS3_col99	major_a::0	col99::20::OP50::heat_stress	a::0	0	a	2.81719	1.28281	2.02813	1.99063	col99					20	32	OP50	heat_stress				0	0		0	0.48088
																						major	20211004_AHS3_col99	major_a::0	col99::20::OP50::heat_stress	a::0	0	a	2.81719	1.28281	2.02813	1.99063	col99					20	32	OP50	heat_stress				0	1		0	0.272546
																						major	20211004_AHS3_col99	major_a::0	col99::20::OP50::heat_stress	a::0	0	a	2.81719	1.28281	2.02813	1.99063	col99					20	32	OP50	heat_stress				0	0		0	0.439213
																						major	20211004_AHS3_col99	major_a::0	col99::20::OP50::heat_stress	a::0	0	a	2.81719	1.28281	2.02813	1.99063	col99					20	32	OP50	heat_stress				0	0		0	0.439213
																						major	20211004_AHS3_col99	major_a::0	col99::20::OP50::heat_stress	a::0	0	a	2.81719	1.28281	2.02813	1.99063	col99					20	32	OP50	heat_stress				0	0		0	0.439213
																						major	20211004_AHS3_col99	major_a::0	col99::20::OP50::heat_stress	a::0	0	a	2.81719	1.28281	2.02813	1.99063	col99					20	32	OP50	heat_stress				0	0		0	0.439213
																						major	20211004_AHS3_col99	major_a::0	col99::20::OP50::heat_stress	a::0	0	a	2.81719	1.28281	2.02813	1.99063	col99					20	32	OP50	heat_stress				0	0		0	0.439213
																						major	20211004_AHS3_col99	major_a::0	col99::20::OP50::heat_stress	a::0	0	a	2.81719	1.28281	2.02813	1.99063	col99					20	32	OP50	heat_stress				0	0		0	0.397546
																						major	20211004_AHS3_col99	major_a::0	col99::20::OP50::heat_stress	a::0	0	a	2.81719	1.28281	2.02813	1.99063	col99					20	32	OP50	heat_stress				0	0		0	0.439213
																						major	20211004_AHS3_col99	major_a::0	col99::20::OP50::heat_stress	a::0	0	a	2.81719	1.28281	2.02813	1.99063	col99					20	32	OP50	heat_stress				0	0		0	0.397546
																						major	20211004_AHS3_col99	major_a::0	col99::20::OP50::heat_stress	a::0	0	a	2.81719	1.28281	2.02813	1.99063	col99					20	32	OP50	heat_stress				0	0		0	0.439213
																						major	20211004_AHS3_col99	major_a::0	col99::20::OP50::heat_stress	a::0	0	a	2.81719	1.28281	2.02813	1.99063	col99					20	32	OP50	heat_stress				0	0		0	0.439213
																						major	20211004_AHS3_col99	major_a::0	col99::20::OP50::heat_stress	a::0	0	a	2.81719	1.28281	2.02813	1.99063	col99					20	32	OP50	heat_stress				0	1	Extra worm from multiple-worm disambiguation	0	0.439213
																						major	20211004_AHS3_col99	major_a::0	col99::20::OP50::heat_stress	a::0	0	a	2.81719	1.28281	2.02813	1.99063	col99					20	32	OP50	heat_stress				0	0		0	0.397546
																						major	20211004_AHS3_col99	major_a::0	col99::20::OP50::heat_stress	a::0	0	a	2.81719	1.28281	2.02813	1.99063	col99					20	32	OP50	heat_stress				0	0		0	0.397546
																						major	20211004_AHS3_col99	major_a::0	col99::20::OP50::heat_stress	a::0	0	a	2.81719	1.28281	2.02813	1.99063	col99					20	32	OP50	heat_stress				0	0		0	0.397546
																						major	20211004_AHS3_col99	major_a::0	col99::20::OP50::heat_stress	a::0	0	a	2.81719	1.28281	2.02813	1.99063	col99					20	32	OP50	heat_stress				0	0		0	0.397546
																						major	20211004_AHS3_col99	major_a::0	col99::20::OP50::heat_stress	a::0	0	a	2.81719	1.28281	2.02813	1.99063	col99					20	32	OP50	heat_stress				0	0		0	0.397546
																						major	20211004_AHS3_col99	major_a::0	col99::20::OP50::heat_stress	a::0	0	a	2.81719	1.28281	2.02813	1.99063	col99					20	32	OP50	heat_stress				0	0		0	0.397546
																						major	20211004_AHS3_col99	major_a::0	col99::20::OP50::heat_stress	a::0	0	a	2.81719	1.28281	2.02813	1.99063	col99					20	32	OP50	heat_stress				0	0		0	0.397546
																						major	20211004_AHS3_col99	major_a::0	col99::20::OP50::heat_stress	a::0	0	a	2.81719	1.28281	2.02813	1.99063	col99					20	32	OP50	heat_stress				0	0		0	0.35588
																						major	20211004_AHS3_col99	major_a::0	col99::20::OP50::heat_stress	a::0	0	a	2.81719	1.28281	2.02813	1.99063	col99					20	32	OP50	heat_stress				0	0		0	0.35588
																						major	20211004_AHS3_col99	major_a::0	col99::20::OP50::heat_stress	a::0	0	a	2.81719	1.28281	2.02813	1.99063	col99					20	32	OP50	heat_stress				0	0		0	0.35588
																						major	20211004_AHS3_col99	major_a::0	col99::20::OP50::heat_stress	a::0	0	a	2.81719	1.28281	2.02813	1.99063	col99					20	32	OP50	heat_stress				0	0		0	0.35588
																						major	20211004_AHS3_col99	major_a::0	col99::20::OP50::heat_stress	a::0	0	a	2.81719	1.28281	2.02813	1.99063	col99					20	32	OP50	heat_stress				0	0		0	0.314213
																						major	20211004_AHS3_col99	major_a::0	col99::20::OP50::heat_stress	a::0	0	a	2.81719	1.28281	2.02813	1.99063	col99					20	32	OP50	heat_stress				0	0		0	0.314213
																						major	20211004_AHS3_col99	major_a::0	col99::20::OP50::heat_stress	a::0	0	a	2.81719	1.28281	2.02813	1.99063	col99					20	32	OP50	heat_stress				0	0		0	0.314213
																						major	20211004_AHS3_col99	major_a::0	col99::20::OP50::heat_stress	a::0	0	a	2.81719	1.28281	2.02813	1.99063	col99					20	32	OP50	heat_stress				0	0		0	0.147546
																						major	20211004_AHS3_col99	major_a::0	col99::20::OP50::heat_stress	a::0	0	a	2.81719	1.28281	2.02813	1.99063	col99					20	32	OP50	heat_stress				0	0		0	0.23088
																						major	20211004_AHS3_col99	major_a::0	col99::20::OP50::heat_stress	a::0	0	a	2.81719	1.28281	2.02813	1.99063	col99					20	32	OP50	heat_stress				0	0		0	0.189213
																						major	20211004_AHS3_col99	major_a::0	col99::20::OP50::heat_stress	a::0	0	a	2.81719	1.28281	2.02813	1.99063	col99					20	32	OP50	heat_stress				0	0		0	0.064213
																						major	20211004_AHS3_col99	major_a::0	col99::20::OP50::heat_stress	a::0	0	a	2.81719	1.28281	2.02813	1.99063	col99					20	32	OP50	heat_stress				0	1		0	0.022546
																						major	20211004_AHS3_col99	major_a::1	col99::20::OP50::heat_stress	a::1	1	a	3.18125	3.62344	1.99375	2.00937	col99					20	32	OP50	heat_stress				0	1		0	1.23088
																						major	20211004_AHS3_col99	major_a::1	col99::20::OP50::heat_stress	a::1	1	a	3.18125	3.62344	1.99375	2.00937	col99					20	32	OP50	heat_stress				0	1		0	2.06421
																						major	20211004_AHS3_col99	major_a::1	col99::20::OP50::heat_stress	a::1	1	a	3.18125	3.62344	1.99375	2.00937	col99					20	32	OP50	heat_stress				0	0		0	0.064213
																						major	20211004_AHS3_col99	major_a::1	col99::20::OP50::heat_stress	a::1	1	a	3.18125	3.62344	1.99375	2.00937	col99					20	32	OP50	heat_stress				0	1		0	0.314213
																						major	20211004_AHS3_col99	major_a::1	col99::20::OP50::heat_stress	a::1	1	a	3.18125	3.62344	1.99375	2.00937	col99					20	32	OP50	heat_stress				0	0		0	0.647546
																						major	20211004_AHS3_col99	major_a::1	col99::20::OP50::heat_stress	a::1	1	a	3.18125	3.62344	1.99375	2.00937	col99					20	32	OP50	heat_stress				0	0		0	0.60588
																						major	20211004_AHS3_col99	major_a::1	col99::20::OP50::heat_stress	a::1	1	a	3.18125	3.62344	1.99375	2.00937	col99					20	32	OP50	heat_stress				0	0		0	0.60588
																						major	20211004_AHS3_col99	major_a::1	col99::20::OP50::heat_stress	a::1	1	a	3.18125	3.62344	1.99375	2.00937	col99					20	32	OP50	heat_stress				0	0		0	0.022546
																						major	20211004_AHS3_col99	major_a::1	col99::20::OP50::heat_stress	a::1	1	a	3.18125	3.62344	1.99375	2.00937	col99					20	32	OP50	heat_stress				0	0		0	0.564213
																						major	20211004_AHS3_col99	major_a::1	col99::20::OP50::heat_stress	a::1	1	a	3.18125	3.62344	1.99375	2.00937	col99					20	32	OP50	heat_stress				0	0		0	0.564213
																						major	20211004_AHS3_col99	major_a::1	col99::20::OP50::heat_stress	a::1	1	a	3.18125	3.62344	1.99375	2.00937	col99					20	32	OP50	heat_stress				0	0		0	0.522546
																						major	20211004_AHS3_col99	major_a::1	col99::20::OP50::heat_stress	a::1	1	a	3.18125	3.62344	1.99375	2.00937	col99					20	32	OP50	heat_stress				0	0		0	0.48088
																						major	20211004_AHS3_col99	major_a::1	col99::20::OP50::heat_stress	a::1	1	a	3.18125	3.62344	1.99375	2.00937	col99					20	32	OP50	heat_stress				0	0		0	0.522546
																						major	20211004_AHS3_col99	major_a::1	col99::20::OP50::heat_stress	a::1	1	a	3.18125	3.62344	1.99375	2.00937	col99					20	32	OP50	heat_stress				0	0		0	0.48088
																						major	20211004_AHS3_col99	major_a::1	col99::20::OP50::heat_stress	a::1	1	a	3.18125	3.62344	1.99375	2.00937	col99					20	32	OP50	heat_stress				0	0		0	0.48088
																						major	20211004_AHS3_col99	major_a::1	col99::20::OP50::heat_stress	a::1	1	a	3.18125	3.62344	1.99375	2.00937	col99					20	32	OP50	heat_stress				0	0		0	0.48088
																						major	20211004_AHS3_col99	major_a::1	col99::20::OP50::heat_stress	a::1	1	a	3.18125	3.62344	1.99375	2.00937	col99					20	32	OP50	heat_stress				0	0		0	0.522546
																						major	20211004_AHS3_col99	major_a::1	col99::20::OP50::heat_stress	a::1	1	a	3.18125	3.62344	1.99375	2.00937	col99					20	32	OP50	heat_stress				0	0		0	0.48088
																						major	20211004_AHS3_col99	major_a::1	col99::20::OP50::heat_stress	a::1	1	a	3.18125	3.62344	1.99375	2.00937	col99					20	32	OP50	heat_stress				0	0		0	0.522546
																						major	20211004_AHS3_col99	major_a::1	col99::20::OP50::heat_stress	a::1	1	a	3.18125	3.62344	1.99375	2.00937	col99					20	32	OP50	heat_stress				0	0		0	0.522546
																						major	20211004_AHS3_col99	major_a::1	col99::20::OP50::heat_stress	a::1	1	a	3.18125	3.62344	1.99375	2.00937	col99					20	32	OP50	heat_stress				0	0		0	0.522546
																						major	20211004_AHS3_col99	major_a::1	col99::20::OP50::heat_stress	a::1	1	a	3.18125	3.62344	1.99375	2.00937	col99					20	32	OP50	heat_stress				0	0		0	0.48088
																						major	20211004_AHS3_col99	major_a::1	col99::20::OP50::heat_stress	a::1	1	a	3.18125	3.62344	1.99375	2.00937	col99					20	32	OP50	heat_stress				0	0		0	0.522546
																						major	20211004_AHS3_col99	major_a::1	col99::20::OP50::heat_stress	a::1	1	a	3.18125	3.62344	1.99375	2.00937	col99					20	32	OP50	heat_stress				0	0		0	0.48088
																						major	20211004_AHS3_col99	major_a::1	col99::20::OP50::heat_stress	a::1	1	a	3.18125	3.62344	1.99375	2.00937	col99					20	32	OP50	heat_stress				0	0		0	0.48088
																						major	20211004_AHS3_col99	major_a::1	col99::20::OP50::heat_stress	a::1	1	a	3.18125	3.62344	1.99375	2.00937	col99					20	32	OP50	heat_stress				0	0		0	0.48088
																						major	20211004_AHS3_col99	major_a::1	col99::20::OP50::heat_stress	a::1	1	a	3.18125	3.62344	1.99375	2.00937	col99					20	32	OP50	heat_stress				0	0		0	0.48088
																						major	20211004_AHS3_col99	major_a::1	col99::20::OP50::heat_stress	a::1	1	a	3.18125	3.62344	1.99375	2.00937	col99					20	32	OP50	heat_stress				0	0		0	0.48088
																						major	20211004_AHS3_col99	major_a::1	col99::20::OP50::heat_stress	a::1	1	a	3.18125	3.62344	1.99375	2.00937	col99					20	32	OP50	heat_stress				0	0		0	0.439213
																						major	20211004_AHS3_col99	major_a::1	col99::20::OP50::heat_stress	a::1	1	a	3.18125	3.62344	1.99375	2.00937	col99					20	32	OP50	heat_stress				0	0		0	0.48088
																						major	20211004_AHS3_col99	major_a::1	col99::20::OP50::heat_stress	a::1	1	a	3.18125	3.62344	1.99375	2.00937	col99					20	32	OP50	heat_stress				0	0		0	0.48088
																						major	20211004_AHS3_col99	major_a::1	col99::20::OP50::heat_stress	a::1	1	a	3.18125	3.62344	1.99375	2.00937	col99					20	32	OP50	heat_stress				0	0		0	0.439213
																						major	20211004_AHS3_col99	major_a::1	col99::20::OP50::heat_stress	a::1	1	a	3.18125	3.62344	1.99375	2.00937	col99					20	32	OP50	heat_stress				0	0		0	0.439213
																						major	20211004_AHS3_col99	major_a::1	col99::20::OP50::heat_stress	a::1	1	a	3.18125	3.62344	1.99375	2.00937	col99					20	32	OP50	heat_stress				0	0		0	0.439213
																						major	20211004_AHS3_col99	major_a::1	col99::20::OP50::heat_stress	a::1	1	a	3.18125	3.62344	1.99375	2.00937	col99					20	32	OP50	heat_stress				0	0		0	0.439213
																						major	20211004_AHS3_col99	major_a::1	col99::20::OP50::heat_stress	a::1	1	a	3.18125	3.62344	1.99375	2.00937	col99					20	32	OP50	heat_stress				0	0		0	0.439213
																						major	20211004_AHS3_col99	major_a::1	col99::20::OP50::heat_stress	a::1	1	a	3.18125	3.62344	1.99375	2.00937	col99					20	32	OP50	heat_stress				0	0		0	0.397546
																						major	20211004_AHS3_col99	major_a::1	col99::20::OP50::heat_stress	a::1	1	a	3.18125	3.62344	1.99375	2.00937	col99					20	32	OP50	heat_stress				0	0		0	0.397546
																						major	20211004_AHS3_col99	major_a::1	col99::20::OP50::heat_stress	a::1	1	a	3.18125	3.62344	1.99375	2.00937	col99					20	32	OP50	heat_stress				0	0		0	0.397546
																						major	20211004_AHS3_col99	major_a::1	col99::20::OP50::heat_stress	a::1	1	a	3.18125	3.62344	1.99375	2.00937	col99					20	32	OP50	heat_stress				0	0		0	0.35588
																						major	20211004_AHS3_col99	major_a::1	col99::20::OP50::heat_stress	a::1	1	a	3.18125	3.62344	1.99375	2.00937	col99					20	32	OP50	heat_stress				0	0		0	0.35588
																						major	20211004_AHS3_col99	major_a::1	col99::20::OP50::heat_stress	a::1	1	a	3.18125	3.62344	1.99375	2.00937	col99					20	32	OP50	heat_stress				0	1		0	0.189213
																						major	20211004_AHS3_col99	major_a::1	col99::20::OP50::heat_stress	a::1	1	a	3.18125	3.62344	1.99375	2.00937	col99					20	32	OP50	heat_stress				0	1		0	0.022546
																						major	20211004_AHS3_col99	major_a::2	col99::20::OP50::heat_stress	a::2	2	a	2.22344	5.71094	2.00312	1.99063	col99					20	32	OP50	heat_stress				0	1		0	0.022546
																						major	20211004_AHS3_col99	major_a::2	col99::20::OP50::heat_stress	a::2	2	a	2.22344	5.71094	2.00312	1.99063	col99					20	32	OP50	heat_stress				0	1	Extra worm from multiple-worm disambiguation	0	0.48088
																						major	20211004_AHS3_col99	major_a::2	col99::20::OP50::heat_stress	a::2	2	a	2.22344	5.71094	2.00312	1.99063	col99					20	32	OP50	heat_stress				0	1		0	1.81421
																						major	20211004_AHS3_col99	major_a::2	col99::20::OP50::heat_stress	a::2	2	a	2.22344	5.71094	2.00312	1.99063	col99					20	32	OP50	heat_stress				0	1		0	0.98088
[truncated: 2,287 more rows]
[truncated: 25 more columns]

## Sheet: Western Blot_Fig 3E
Note: col-99(SNP) is col-99(gk694263[S106L])
[truncated: 4 more rows]
