# Supplementary material for: A Centenarian Single Nucleotide Polymorphism in collagen gene COL25A1 promotes longevity in C. elegans
Source: Research Square preprint supplement (doi:10.21203/rs.3.rs-6035585/v1), 2025-04-29
Supplement: Supplementary file 1 [file 1073380f83348b3b4307727f.pdf]

a

| Gene Name | Description                                                       | SNP centenarian<br>[# of SNPs/ # studies] | Experimental evidence for<br>longevity |
|-----------|-------------------------------------------------------------------|-------------------------------------------|----------------------------------------|
| TACR3     | Tachykinin Receptor 3                                             | 1/1                                       |                                        |
| CXXC4     | CXXC Finger Protein 4                                             |                                           |                                        |
| TET2      | Tet methylcytosine dioxygenase 2                                  |                                           |                                        |
| PPA2      | Pyrophosphatase 2                                                 |                                           | yeast longevity                        |
| ARHGEF38  | Rho Guanine Nucleotide Exchange Factor 38                         |                                           |                                        |
| INTS12    | Integrator complex subunit 12                                     |                                           |                                        |
| GSTCD     | Glutathione S-Transferase C-Terminal Domain<br>Containing         |                                           |                                        |
| NPNT      | Nephronectin                                                      |                                           |                                        |
| TBCK      | Tre-2/Bub2/Cdc16 (TBC) domain<br>kinase                           |                                           |                                        |
| AIMP1     | Arginyl-tRNA synthase                                             |                                           |                                        |
| GIMD1     | GIMAP Family P-Loop NTPase Domain<br>Containing 1                 |                                           |                                        |
| DKK2      | Dickkopf WNT Signaling Pathway Inhibitor 2                        | 1/1                                       |                                        |
| PAPSS1    | 3'-Phosphoadenosine 5'-Phosphosulfate<br>Synthase 1               | 1/1                                       |                                        |
| SGMS2     | Sphingomyelin Synthase 2                                          |                                           |                                        |
| CYP2U1    | Cytochrome P450 Family 2 Subfamily U<br>Member 1                  |                                           | <i>C. elegans</i> longevity            |
| HADH      | Hydroxyacyl-CoA Dehydrogenase                                     |                                           |                                        |
| LEF1      | Lymphoid Enhancer Binding Factor 1                                |                                           |                                        |
| RPL34     | Ribosomal Protein L34                                             |                                           | yeast & <i>C. elegans</i><br>longevity |
| OSTC      | Oligosaccharyltransferase Complex Non-<br>Catalytic Subunit       |                                           |                                        |
| ETNPPL    | Ethanolamine-Phosphate Phospho-Lyase                              |                                           |                                        |
| COL25A1   | Collagen type XXV alpha 1 chain                                   | 9/3                                       |                                        |
| CELC48B   | CELC48 Coat Complex Component                                     |                                           |                                        |
| MCUB      | Mitochondrial Calcium Uniporter Dominant<br>Negative Subunit Beta |                                           |                                        |
| CASP6     | Caspase 6                                                         |                                           |                                        |
| PLA2G12A  | Phospholipase A2 Group XIIA                                       |                                           |                                        |
| CFI       | Complement factor I (eye)                                         |                                           |                                        |
| GAR1      | Ribonucleoprotein                                                 | 1/1                                       |                                        |
| RRH       | Retinal Pigment Epithelium-Derived Rhodopsin<br>Homolog           |                                           |                                        |
| LRIT3     | Leucine Rich Repeat, Ig-Like And<br>Transmembrane Domains 3       |                                           |                                        |
| EGF       | Epidermal Growth Factor                                           |                                           | <i>C. elegans</i> longevity            |
| ELOVL6    | Fatty acid elongases                                              | 1/1                                       | <i>C. elegans</i> longevity            |
| ENPEP     | Glutamyl Aminopeptidase                                           |                                           |                                        |
| PITX2     | Paired-like homeodomain transcription factor 2                    |                                           |                                        |

b

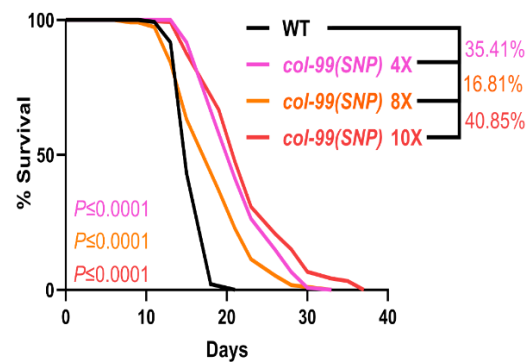

c

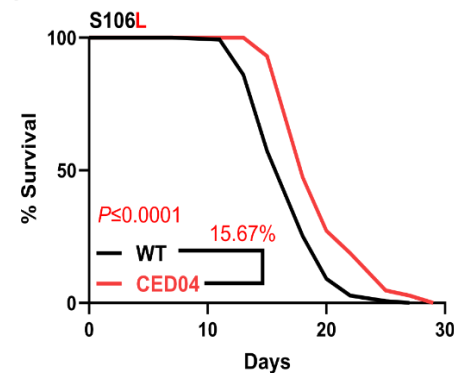

d

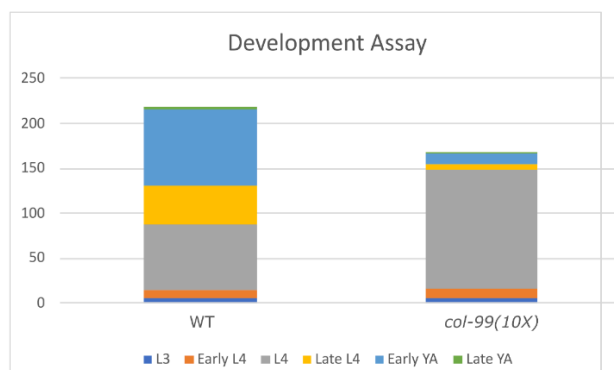

e

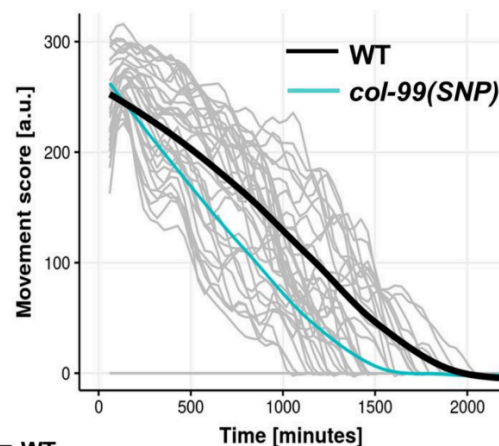

f

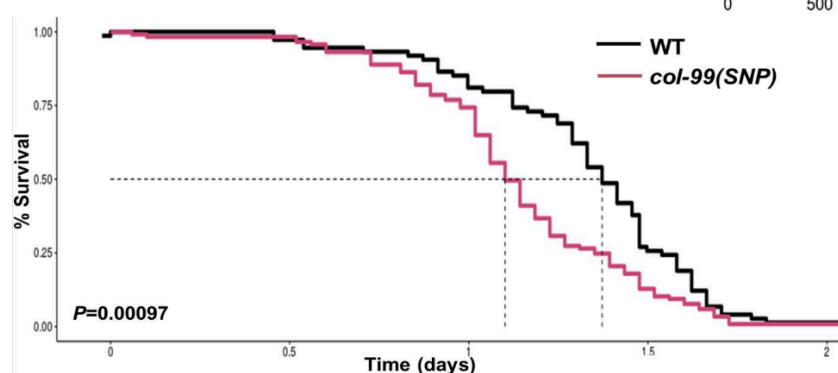

### Figure S1:

a) List of the 108 ensemble features annotated in the longevity-associated region on chromosome 4. For details, see Supplementary Table 1. b) Lifespan curve showing the differential increase in lifespan by 4X, 8X, and 10X outcrossed *col-99(gk694263[S106L])* SNP mutant. c) Lifespan curve showing extension of lifespan by CRISPR mutant CED04 *col-99(syb4350[S106L])*. The lifespans were performed in at least two biological replicates at 20 °C. Kaplan-Meier Log-Rank test was performed for statistical analysis using the online software OASIS. A lifespan summary for individual experiments is provided in Supplementary Table 2. d) A bar graph representing a slight delay in the developmental stages of *col-99(gk694263[S106L])* SNP mutant compared to wild-type. e, f) Survival curves showing susceptibility of *col-99(gk694263[S106L])* SNP mutant to oxidative stress (e; 14 mM Arsenite), and heat stress (f; 32 °C). The oxidative stress experiment was done in three biological replicates, and the heat stress assay was done in two biological replicates at 32 °C and once at 35 °C. *col-99(SNP)* is *col-99(gk694263[S106L])*.

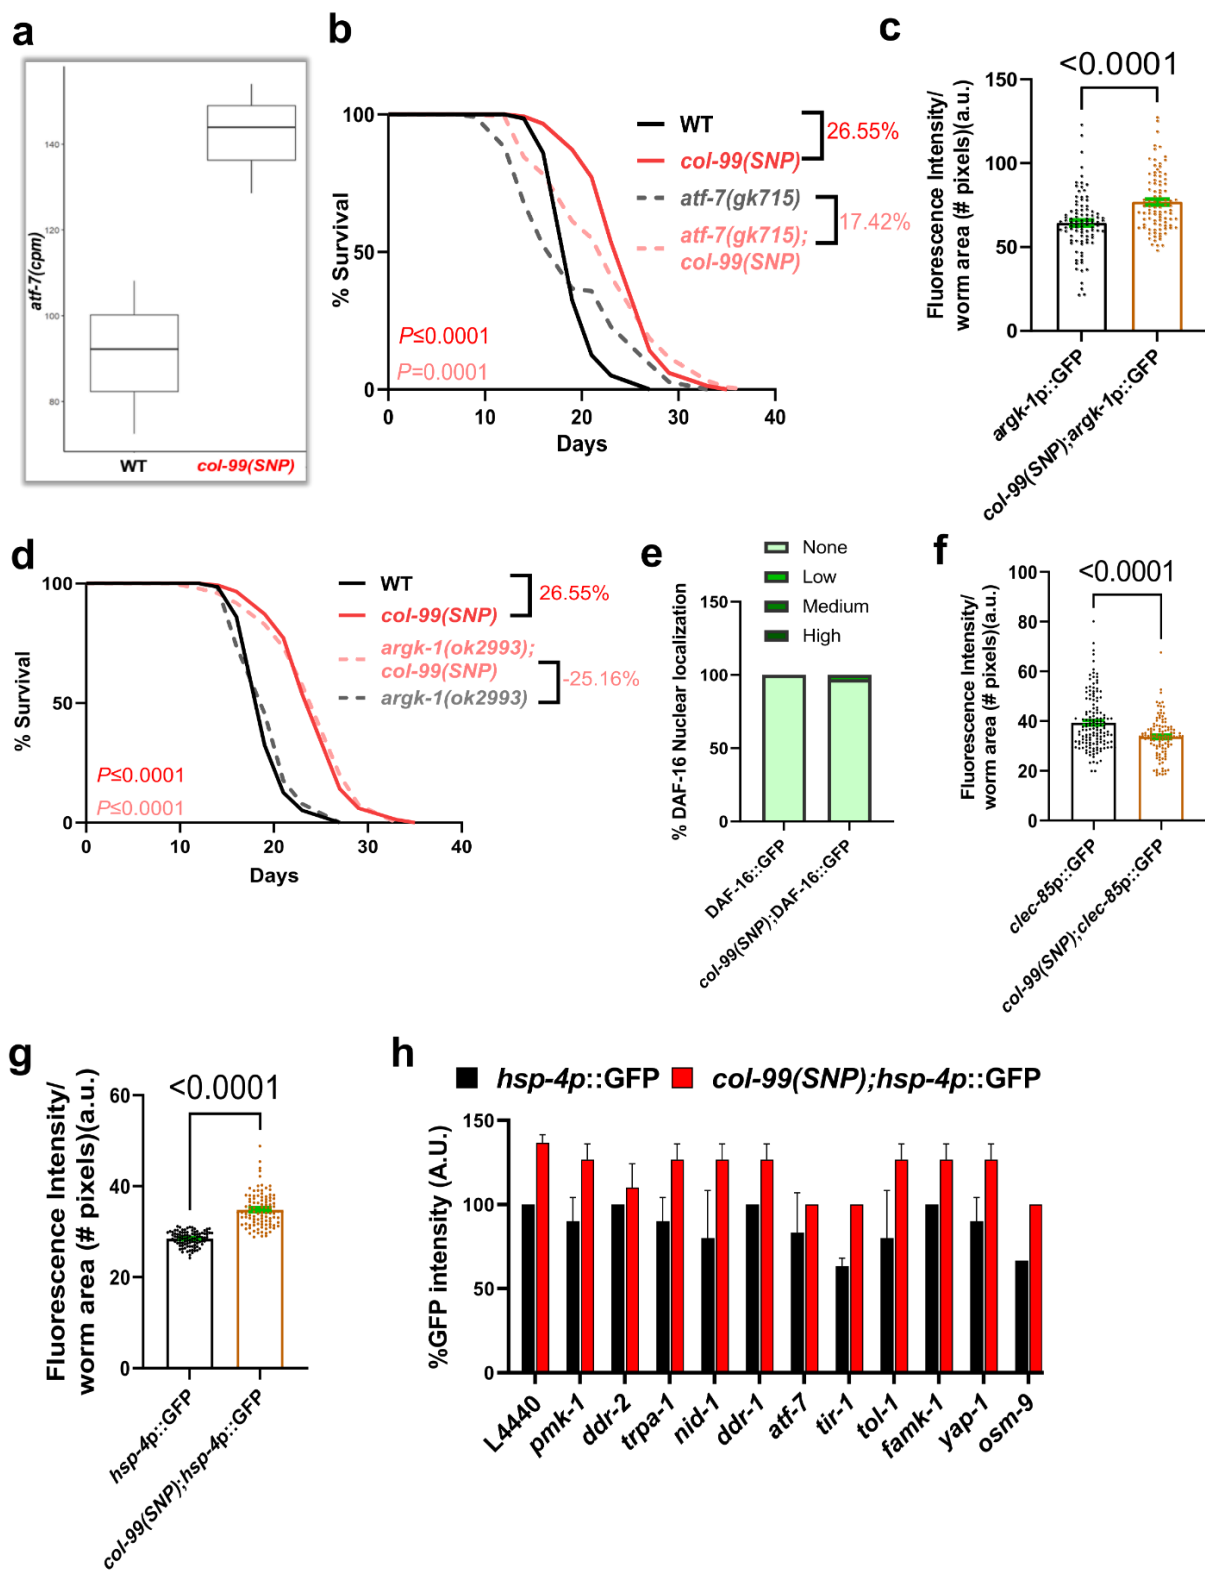

## Figure S2:

a) Graph showing an increase in the expression of *atf-7* transcripts in *col-99(gk694263[S106L])* SNP mutant compared to wild-type (in terms of FKPM values). b) Survival curve showing the lifespan of *col-99(gk694263[S106L])* SNP mutant is independent of *atf-7*. The lifespans were performed in at least two biological replicates at 20 °C. Kaplan-Meier Log-Rank test was performed for statistical analysis using the online software OASIS. A lifespan summary for individual experiments is provided in Supplementary Table 2. c) Bar graph showing slightly more fluorescence intensity per pixel number for *argk-1p::GFP* in *col-99(gk694263[S106L])* SNP mutant background. Data is plotted as mean, and error bars represent SEM. Two-tailed Welch's *t*-test statistical analysis. The experiment was performed in three biological batches, with  $n > 80$  total animals per condition. d) Survival curve showing extension in the lifespan of *col-99(gk694263[S106L])* SNP mutant is independent of *argk-1* mutation. The lifespans were performed in at least two biological replicates at 20 °C. Kaplan-Meier Log-Rank test was performed for statistical analysis using the online software OASIS. A lifespan summary for individual experiments is provided in Supplementary Table 2. e) Bar graph showing no change in DAF-16 nuclear localization percentage in *col-99(gk694263[S106L])* SNP mutant versus wild-type. f, g) Bar graph showing slightly less fluorescence intensity per pixel number for *clec-85p::GFP* in *col-99(gk694263[S106L])* SNP mutant background compared to wild-type (f), and an increase in the fluorescence intensity per pixel number for *hsp-4p::GFP*; *col-99(gk694263[S106L])* SNP transgenic as compared to wild-type (g). h) Targeted eyeball screening of selected genes to look for the dependence of *hsp-4* in

*col-99(gk694263[S106L])* SNP mutant background. Data is plotted as mean, and error bars represent SEM. Two-tailed Welch's *t*-test statistical analysis. The experiment was performed in three biological batches, with  $n > 80$  total animals per condition. *col-99*(SNP) is *col-99(gk694263[S106L])*.

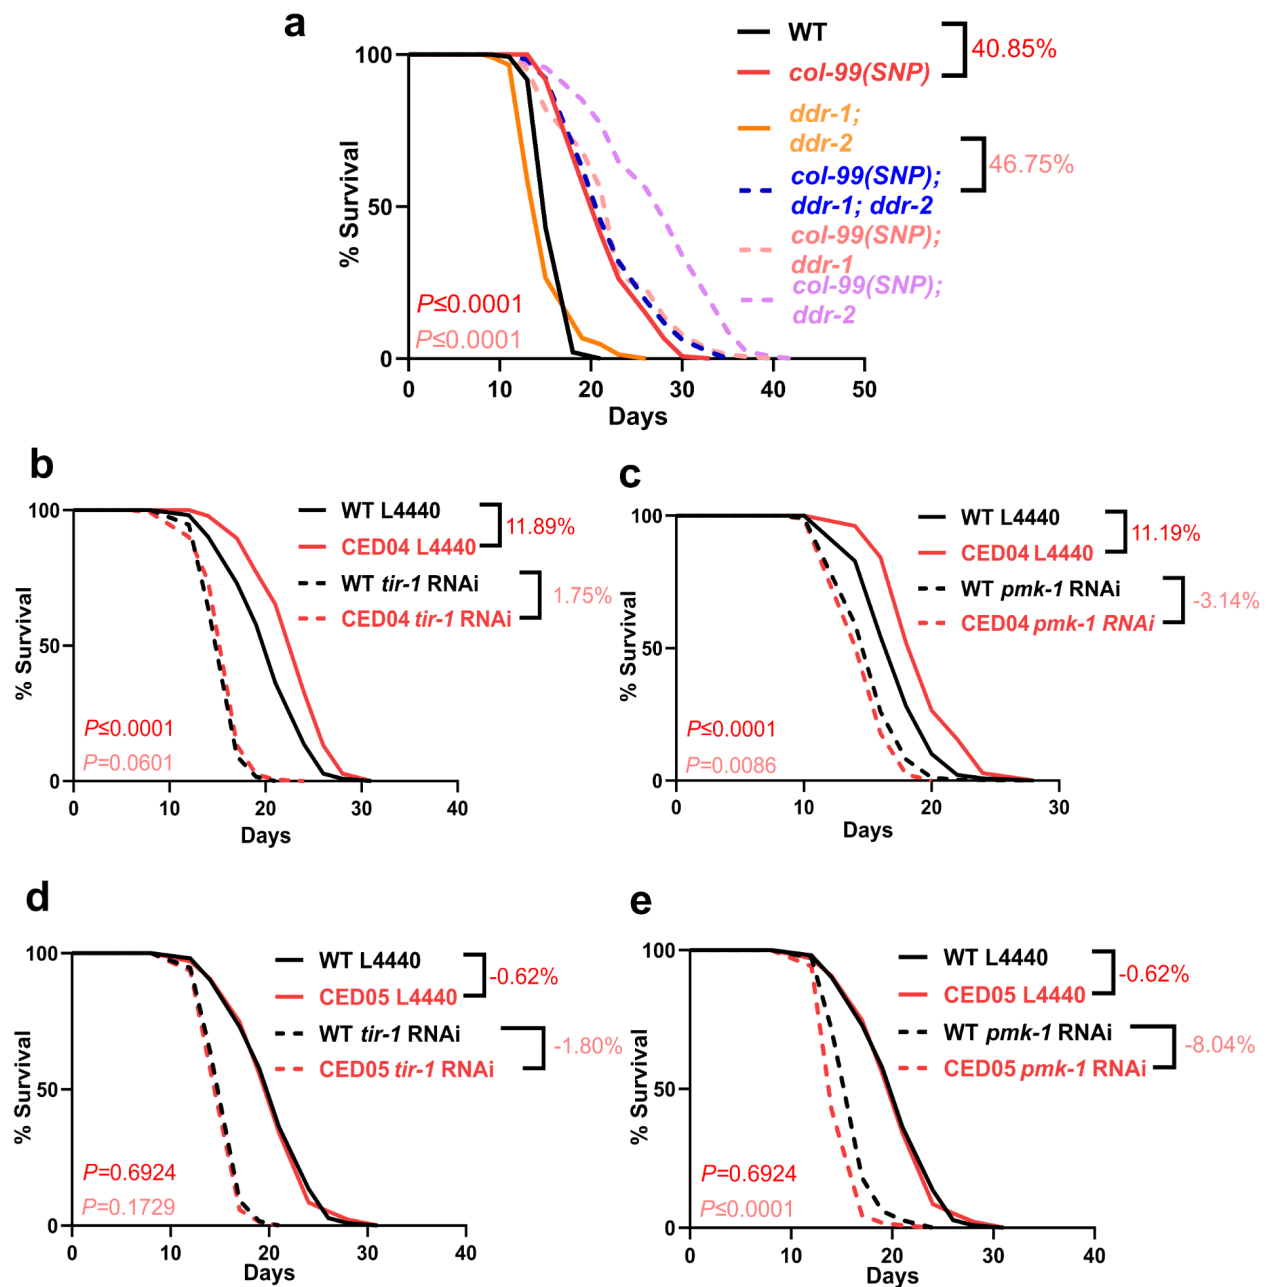

### Figure S3:

The survival curve shows that a) *col-99(gk694263[S106L])* SNP still extends lifespan in *ddr-1* and *ddr-2* mutant backgrounds, showing independence from *ddr-1* or *ddr-2*. b, c) extension in lifespan in *col-99(gk694263[S106L])* SNP mutant is dependent on *tir-1* (b) and *pmk-1* (d), as knockdown of these genes does not lead to an increase in lifespan in *col-99(gk694263[S106L])* SNP background. d, e) dependence of CED05 *col-99(syb4352[S106D])* lifespan on *tir-1* (d) and *pmk-1* (e). The lifespans were performed in at least two biological replicates at 20 °C. Kaplan-Meier Log-Rank test was performed for statistical analysis using the online software OASIS. A lifespan summary for individual experiments is provided in Supplementary Table 2. *col-99*(SNP) is *col-99(gk694263[S106L])*.

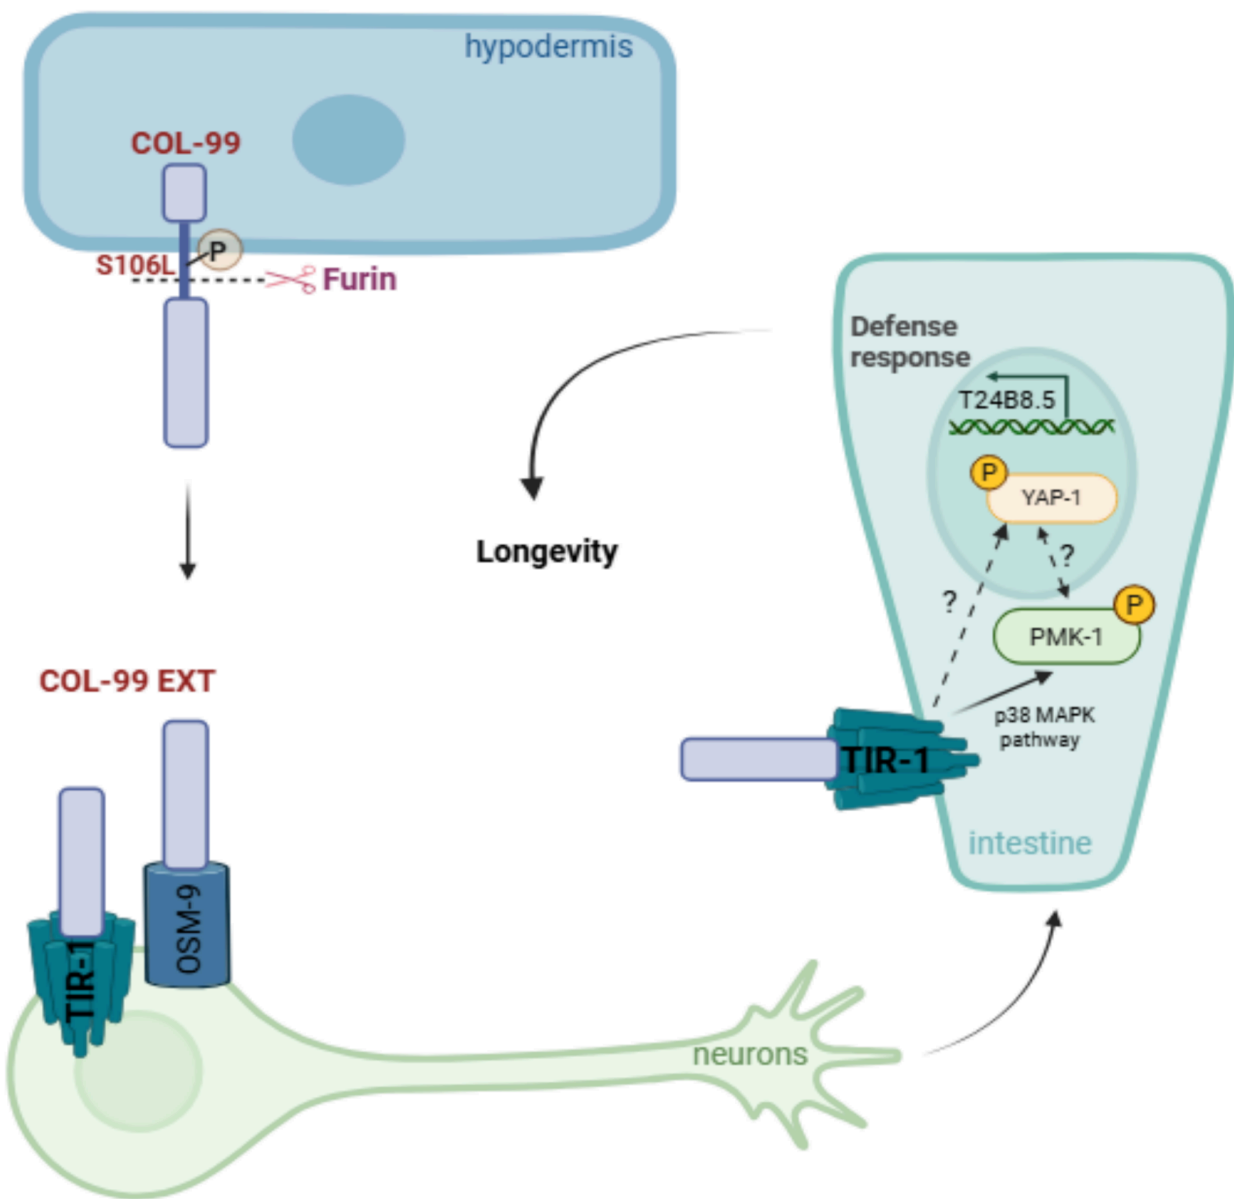

**Figure S4: Hypothetical model showing the role of *col-99* in innate immune response and longevity.**

We speculate that the S106L SNP in COL-99 alters furin-mediated cleavage, releasing the COL-99 extracellular domain (COL-99 EXT) in the hypodermis. COL-99 EXT traverses to interact with OSM-9/TIR-1 receptors in neurons or TIR-1 in the intestine.

COL-99 EXT interacts with TIR-1 in the intestine or indirectly through binding to OSM-9 in neurons, activating the p38 MAPK pathway. Together with YAP-1, PMK-1 upregulates innate immune responses, leading to longevity.
