# Supplementary material for: A Centenarian Single Nucleotide Polymorphism in collagen gene COL25A1 promotes longevity in C. elegans
Source: Research Square preprint supplement (doi:10.21203/rs.3.rs-6035585/v1), 2025-04-29
Supplement: Supplementary file 2 [file 68c9b9737ac48a43619c5c07.xlsx]

## Sheet: Supplementary Table 1_all_genes
gene_id	gene_name	gene_biotype	gene_seq_start	gene_seq_end	seq_name	seq_strand	seq_coord_system	symbol
ENSG00000169836	TACR3	protein_coding	103586031	103719816	4	-1	chromosome	TACR3
ENSG00000252460	RNU6-635P	snRNA	103924540	103924641	4	1	chromosome	RNU6-635P
ENSG00000249614	RP11-703G6.1	lincRNA	103961616	104036923	4	1	chromosome	RP11-703G6.1
ENSG00000251170	RP11-729M20.1	lincRNA	104230380	104411035	4	1	chromosome	RP11-729M20.1
ENSG00000168772	CXXC4	protein_coding	104468312	104494901	4	-1	chromosome	CXXC4
ENSG00000245384	AC004053.1	antisense	104490965	104697592	4	1	chromosome	AC004053.1
ENSG00000250670	AC004063.1	lincRNA	104556960	104568877	4	1	chromosome	AC004063.1
ENSG00000248242	RP11-556I14.2	lincRNA	104653874	104966793	4	-1	chromosome	RP11-556I14.2
ENSG00000244470	RP11-395M19.1	processed_pseudogene	104886118	104886955	4	-1	chromosome	RP11-395M19.1
ENSG00000248373	RP11-556I14.1	lincRNA	104907357	105120000	4	1	chromosome	RP11-556I14.1
ENSG00000251906	RNU6-351P	snRNA	104974672	104974771	4	1	chromosome	RNU6-351P
ENSG00000276992	RP11-556I14.3	processed_pseudogene	104996900	104997052	4	-1	chromosome	RP11-556I14.3
ENSG00000251473	AC004069.1	processed_pseudogene	105102891	105104004	4	-1	chromosome	AC004069.1
ENSG00000252136	SNORA31	snoRNA	105105987	105106094	4	1	chromosome	SNORA31
ENSG00000251259	AC004069.2	lincRNA	105137280	105140619	4	-1	chromosome	AC004069.2
ENSG00000168769	TET2	protein_coding	105145875	105279816	4	1	chromosome	TET2
LRG_626	TET2	LRG_gene	105145875	105279803	4	1	chromosome	TET2
ENSG00000251586	TET2-AS1	antisense	105171354	105178063	4	-1	chromosome	TET2-AS1
ENSG00000243383	RN7SL89P	misc_RNA	105293664	105293946	4	1	chromosome	RN7SL89P
ENSG00000138777	PPA2	protein_coding	105369077	105474081	4	-1	chromosome	PPA2
ENSG00000200917	RNU6-553P	snRNA	105406997	105407092	4	1	chromosome	RNU6-553P
ENSG00000249264	EEF1A1P9	processed_pseudogene	105484698	105486080	4	1	chromosome	EEF1A1P9
ENSG00000216425	AC004066.2	processed_pseudogene	105526596	105527397	4	-1	chromosome	AC004066.2
ENSG00000250922	ATP5EP1	processed_pseudogene	105532475	105532630	4	1	chromosome	ATP5EP1
ENSG00000250522	AC004066.3	antisense	105540190	105552355	4	-1	chromosome	AC004066.3
ENSG00000236699	ARHGEF38	protein_coding	105552620	105708093	4	1	chromosome	ARHGEF38
ENSG00000249885	ARHGEF38-IT1	sense_intronic	105561591	105570238	4	1	chromosome	ARHGEF38-IT1
ENSG00000248778	RP11-311D14.1	processed_pseudogene	105679050	105680094	4	-1	chromosome	RP11-311D14.1
ENSG00000138785	INTS12	protein_coding	105682627	105895986	4	-1	chromosome	INTS12
ENSG00000138780	GSTCD	protein_coding	105708778	105847728	4	1	chromosome	GSTCD
ENSG00000251175	RP11-45L9.1	antisense	105746245	105827172	4	-1	chromosome	RP11-45L9.1
ENSG00000168743	NPNT	protein_coding	105894775	106004027	4	1	chromosome	NPNT
ENSG00000250740	RP11-710F7.2	antisense	105927060	105932722	4	-1	chromosome	RP11-710F7.2
ENSG00000249635	RP11-710F7.3	antisense	106003317	106022478	4	-1	chromosome	RP11-710F7.3
ENSG00000145348	TBCK	protein_coding	106041599	106321495	4	-1	chromosome	TBCK
ENSG00000164022	AIMP1	protein_coding	106315544	106349226	4	1	chromosome	AIMP1
ENSG00000250298	GIMD1	protein_coding	106358183	106367435	4	-1	chromosome	GIMD1
ENSG00000249613	RP13-612N21.1	lincRNA	106433624	106453448	4	1	chromosome	RP13-612N21.1
ENSG00000248915	ACTR6P1	processed_pseudogene	106836498	106837601	4	-1	chromosome	ACTR6P1
ENSG00000155011	DKK2	protein_coding	106921802	107283806	4	-1	chromosome	DKK2
ENSG00000213522	RAC1P5	processed_pseudogene	107203349	107203924	4	-1	chromosome	RAC1P5
ENSG00000251081	RP11-713M6.2	lincRNA	107258700	107301870	4	1	chromosome	RP11-713M6.2
ENSG00000252470	RNU6-551P	snRNA	107435118	107435220	4	1	chromosome	RNU6-551P
ENSG00000138801	PAPSS1	protein_coding	107590276	107720452	4	-1	chromosome	PAPSS1
ENSG00000164023	SGMS2	protein_coding	107824563	107915047	4	1	chromosome	SGMS2
ENSG00000245293	RP11-286E11.1	antisense	107863479	107978799	4	-1	chromosome	RP11-286E11.1
ENSG00000222691	RNU6-733P	snRNA	107867807	107867910	4	-1	chromosome	RNU6-733P
ENSG00000155016	CYP2U1	protein_coding	107931369	107953457	4	1	chromosome	CYP2U1
ENSG00000249604	RP11-286E11.2	antisense	107936031	107941255	4	-1	chromosome	RP11-286E11.2
ENSG00000138796	HADH	protein_coding	107989714	108035175	4	1	chromosome	HADH
ENSG00000138795	LEF1	protein_coding	108047545	108168956	4	-1	chromosome	LEF1
ENSG00000232021	LEF1-AS1	processed_transcript	108167525	108256836	4	1	chromosome	LEF1-AS1
ENSG00000239939	RPSAP34	processed_pseudogene	108407843	108408578	4	-1	chromosome	RPSAP34
ENSG00000278589	ZACNP1	unprocessed_pseudogene	108415220	108416639	4	1	chromosome	ZACNP1
ENSG00000250485	EXOC7P1	processed_pseudogene	108417705	108419763	4	-1	chromosome	EXOC7P1
ENSG00000234492	RPL34-AS1	lincRNA	108538190	108620460	4	-1	chromosome	RPL34-AS1
ENSG00000109475	RPL34	protein_coding	108620566	108630412	4	1	chromosome	RPL34
ENSG00000198856	OSTC	protein_coding	108650584	108667820	4	1	chromosome	OSTC
ENSG00000206601	RNU6-431P	snRNA	108652150	108652256	4	1	chromosome	RNU6-431P
ENSG00000164089	ETNPPL	protein_coding	108742040	108763054	4	-1	chromosome	ETNPPL
ENSG00000249257	RP11-75N20.2	processed_pseudogene	108773613	108774020	4	1	chromosome	RP11-75N20.2
ENSG00000250185	RCC2P8	processed_pseudogene	108788745	108789779	4	-1	chromosome	RCC2P8
ENSG00000188517	COL25A1	protein_coding	108810721	109302657	4	-1	chromosome	COL25A1
ENSG00000246774	AC004051.2	lincRNA	109303035	109316135	4	1	chromosome	AC004051.2
ENSG00000249465	RBMXP4	processed_pseudogene	109346326	109347459	4	-1	chromosome	RBMXP4
ENSG00000247950	SEC24B-AS1	antisense	109347475	109433817	4	-1	chromosome	SEC24B-AS1
ENSG00000138802	SEC24B	protein_coding	109433772	109540896	4	1	chromosome	SEC24B
ENSG00000243227	RN7SL55P	misc_RNA	109450772	109451068	4	-1	chromosome	RN7SL55P
ENSG00000207988	MIR576	miRNA	109488698	109488795	4	1	chromosome	MIR576
ENSG00000225094	SETP20	processed_pseudogene	109553243	109554094	4	-1	chromosome	SETP20
ENSG00000249965	CDC42P4	processed_pseudogene	109555170	109555732	4	1	chromosome	CDC42P4
ENSG00000005059	MCUB	protein_coding	109560205	109688726	4	1	chromosome	MCUB
ENSG00000248785	HIGD1AP14	processed_pseudogene	109673843	109674124	4	1	chromosome	HIGD1AP14
ENSG00000138794	CASP6	protein_coding	109688622	109703583	4	-1	chromosome	CASP6
ENSG00000273447	AC004067.5	antisense	109692004	109692703	4	1	chromosome	AC004067.5
ENSG00000123739	PLA2G12A	protein_coding	109709989	109730077	4	-1	chromosome	PLA2G12A
LRG_48	CFI	LRG_gene	109740692	109802179	4	-1	chromosome	CFI
ENSG00000205403	CFI	protein_coding	109740694	109802179	4	-1	chromosome	CFI
ENSG00000272795	RP11-602N24.3	lincRNA	109815047	109815410	4	-1	chromosome	RP11-602N24.3
ENSG00000109534	GAR1	protein_coding	109815510	109824740	4	1	chromosome	GAR1
ENSG00000180245	RRH	protein_coding	109827994	109844604	4	1	chromosome	RRH
ENSG00000183423	LRIT3	protein_coding	109848202	109872315	4	1	chromosome	LRIT3
ENSG00000249681	KRT19P3	processed_pseudogene	109879070	109879897	4	-1	chromosome	KRT19P3
ENSG00000138798	EGF	protein_coding	109912884	110012266	4	1	chromosome	EGF
ENSG00000207260	RNU6-35P	snRNA	109992325	109992431	4	1	chromosome	RNU6-35P
ENSG00000170522	ELOVL6	protein_coding	110045846	110199199	4	-1	chromosome	ELOVL6
ENSG00000263940	RN7SL275P	misc_RNA	110117736	110118070	4	1	chromosome	RN7SL275P
ENSG00000248200	RP11-115A14.1	processed_pseudogene	110146374	110147248	4	1	chromosome	RP11-115A14.1
ENSG00000166530	HSBP1P2	processed_pseudogene	110251871	110252099	4	-1	chromosome	HSBP1P2
ENSG00000250594	RP11-433B3.1	processed_pseudogene	110264865	110265017	4	-1	chromosome	RP11-433B3.1
ENSG00000212160	RNU6-205P	snRNA	110278185	110278291	4	1	chromosome	RNU6-205P
ENSG00000250304	ZBED1P1	processed_pseudogene	110291644	110293573	4	1	chromosome	ZBED1P1
ENSG00000138792	ENPEP	protein_coding	110365733	110565285	4	1	chromosome	ENPEP
ENSG00000251464	RPL7L1P13	processed_pseudogene	110399773	110400511	4	-1	chromosome	RPL7L1P13
ENSG00000251046	ZNF969P	processed_pseudogene	110415898	110418504	4	1	chromosome	ZNF969P
ENSG00000199894	snoU2_19	snoRNA	110433109	110433188	4	-1	chromosome	snoU2_19
ENSG00000250511	RP11-380D23.1	antisense	110512488	110519505	4	-1	chromosome	RP11-380D23.1
ENSG00000250103	PANCR	lincRNA	110595513	110615458	4	-1	chromosome	PANCR
ENSG00000164093	PITX2	protein_coding	110617423	110642123	4	-1	chromosome	PITX2
ENSG00000249519	LINC01438	lincRNA	110794403	110797344	4	1	chromosome	LINC01438
ENSG00000215961	MIR297	miRNA	110860582	110860647	4	-1	chromosome	MIR297
ENSG00000251483	LYPLA1P2	processed_pseudogene	110945109	110945799	4	-1	chromosome	LYPLA1P2
ENSG00000251312	AC004062.2	processed_pseudogene	111063583	111064227	4	1	chromosome	AC004062.2
ENSG00000200963	RNU6-289P	snRNA	111331412	111331518	4	1	chromosome	RNU6-289P
ENSG00000241722	RP11-255I10.1	processed_pseudogene	111551854	111552173	4	1	chromosome	RP11-255I10.1
ENSG00000248656	RP11-255I10.2	lincRNA	111640495	111648808	4	1	chromosome	RP11-255I10.2

## Sheet: All_108 ensembleFeatu_in_region
gene_id	gene_name	gene_biotype	Ref	statement		Ref	statement		Ref	statement		Ref	statement		Ref	statement		ref	Centenarian SNP		ref	Centenarian SNP		ref	Centenarian SNP		ref	Centenarian SNP
ENSG00000245384	AC004053.1	antisense
ENSG00000251586	TET2-AS1	antisense
ENSG00000250522	AC004066.3	antisense
ENSG00000251175	RP11-45L9.1	antisense
ENSG00000250740	RP11-710F7.2	antisense
ENSG00000249635	RP11-710F7.3	antisense
ENSG00000245293	RP11-286E11.1	antisense
ENSG00000249604	RP11-286E11.2	antisense
ENSG00000247950	SEC24B-AS1	antisense
ENSG00000273447	AC004067.5	antisense
ENSG00000250511	RP11-380D23.1	antisense
ENSG00000249614	RP11-703G6.1	lincRNA
ENSG00000251170	RP11-729M20.1	lincRNA
ENSG00000250670	AC004063.1	lincRNA
ENSG00000248242	RP11-556I14.2	lincRNA
ENSG00000248373	RP11-556I14.1	lincRNA
ENSG00000251259	AC004069.2	lincRNA
ENSG00000249613	RP13-612N21.1	lincRNA
ENSG00000251081	RP11-713M6.2	lincRNA
ENSG00000234492	RPL34-AS1	lincRNA
ENSG00000246774	AC004051.2	lincRNA
ENSG00000272795	RP11-602N24.3	lincRNA
ENSG00000250103	PANCR	lincRNA
ENSG00000249519	LINC01438	lincRNA
ENSG00000248656	RP11-255I10.2	lincRNA
LRG_626	TET2	LRG_gene
LRG_48	CFI	LRG_gene
ENSG00000207988	MIR576	miRNA	https://www.tandfonline.com/doi/full/10.3109/17453674.2014.957079	In contrast, hsa-miR-149*, hsa-miR-582-3p, hsa-miR-1227, hsa-miR-634, hsa-miR-576-5p, and hsa-miR-641 were downregulated in osteoarthritis. Interestingly, these miRNAs have been shown to influence pathways associated with cartilage function (Diaz-Prado et al. 2012).		https://www.ncbi.nlm.nih.gov/pmc/articles/PMC5357446/	hsa-miR-576-5p Osteoarthritis Downregulated in the chondrocytes of osteoarthritic patients. Díaz-Prado et al., (2012) ...As a biomarker for osteoarthritis, miR-483-5p was shown to be upregulated in chondrocytes of arthritic patients (Díaz-Prado et al., 2012). Additionally, the same study showed that miR-149*, miR-582-3p, miR-1227, miR-634, miR-576-5p, and miR-641 had a lower expression profile in…		https://www.ncbi.nlm.nih.gov/pmc/articles/PMC6235093/	Table 1 mir-576 downregulated in senescent cells MicroRNA profiling in human diploid fibroblasts uncovers miR-519 role in replicative senescence. Marasa BS, Srikantan S, Martindale JL, Kim MM, Lee EK, Gorospe M, Abdelmohsen K Aging (Albany NY). 2010 Jun; 2(6):333-43. [PubMed] [Ref list] and also in Deep sequencing reveals novel microRNAs and regulation of microRNA expression during cell senescenc…		https://link.springer.com/article/10.14283/jfa.2017.45	The present study profiled exosome-derived microRNAs isolated from the plasma of young, robust older, and frail older individuals and identified eight miRNAs that are uniquely enriched in frailty: miR-10a-3p, miR-92a-3p, miR-185-3p, miR-194-5p, miR-326, miR-532-5p, miR-576-5p, and miR-760.		https://www.researchgate.net/publication/327900253_Targeting_of_SGK1_by_miR-576-3p_Inhibits_Lung_Adenocarcinoma_Migration_and_Invasion	Loss of the ability of miR-576-3p to bind the 3'-UTR of SGK1, rescued the inhibition in migration and invasion observed with miR-576-3p overexpression.
ENSG00000215961	MIR297	miRNA	https://www.ncbi.nlm.nih.gov/pubmed/22676135	miR-297 modulates multidrug resistance in human colorectal carcinoma by down-regulating MRP-2		https://www.sciencedirect.com/science/article/pii/S0888754310002193	Table 1. Six significant association between % OMIM IDs and miRNAs. %152430 Longevity 1; gene map locus 4q25; D4S1564 1.14 8 0.0001 0 mir-297
ENSG00000243383	RN7SL89P	misc_RNA
ENSG00000243227	RN7SL55P	misc_RNA
ENSG00000263940	RN7SL275P	misc_RNA
ENSG00000244470	RP11-395M19.1	processed_pseudogene
ENSG00000276992	RP11-556I14.3	processed_pseudogene
ENSG00000251473	AC004069.1	processed_pseudogene
ENSG00000249264	EEF1A1P9	processed_pseudogene
ENSG00000216425	AC004066.2	processed_pseudogene
ENSG00000250922	ATP5EP1	processed_pseudogene
ENSG00000248778	RP11-311D14.1	processed_pseudogene
ENSG00000248915	ACTR6P1	processed_pseudogene
ENSG00000213522	RAC1P5	processed_pseudogene
ENSG00000239939	RPSAP34	processed_pseudogene
ENSG00000250485	EXOC7P1	processed_pseudogene
ENSG00000249257	RP11-75N20.2	processed_pseudogene
ENSG00000250185	RCC2P8	processed_pseudogene
ENSG00000249465	RBMXP4	processed_pseudogene
ENSG00000225094	SETP20	processed_pseudogene
ENSG00000249965	CDC42P4	processed_pseudogene
ENSG00000248785	HIGD1AP14	processed_pseudogene
ENSG00000249681	KRT19P3	processed_pseudogene
ENSG00000248200	RP11-115A14.1	processed_pseudogene
ENSG00000166530	HSBP1P2	processed_pseudogene
ENSG00000250594	RP11-433B3.1	processed_pseudogene
ENSG00000250304	ZBED1P1	processed_pseudogene
ENSG00000251464	RPL7L1P13	processed_pseudogene
ENSG00000251046	ZNF969P	processed_pseudogene
ENSG00000251483	LYPLA1P2	processed_pseudogene
ENSG00000251312	AC004062.2	processed_pseudogene
ENSG00000241722	RP11-255I10.1	processed_pseudogene
ENSG00000232021	LEF1-AS1	processed_transcript
ENSG00000169836	TACR3	protein_coding	https://www.pnas.org/content/110/37/15097	In a human association study we show that a single-nucleotide polymorphism in the neurokinin3-receptor–coding gene TACR3 can predict learning and memory in elderly patients with cognitive impairments and their hippocampus volume.		http://downloads.hindawi.com/archive/2015/469402.pdf	Rosacea is a chronic skin disease, possibly following the neurogenic skin inflammation model. Neurokinin B, involved in the pathogenesis of Parkinson’s disease, frequently coexisting with subsequent onset of rosacea, is an endogenous ligand of the tachykinin receptor 3 (TACR3).		https://www.ncbi.nlm.nih.gov/pubmed/28359648	xisting agents that have such properties-tachykinin neurokinin 3 receptor antagonists-is proposed as a way of reducing cardiovascular disease and combating a leading cause of global morbidity and mortality.								https://dpv.cmg.med.keio.ac.jp/dpv-pub/variants/5203	This variant was detected among a group of 300 centenarians by NGS and has not been confirmed by Sanger sequence. Considering that these individuals lives longer than 100 years, this variant could be considered "Benign" regardless of the allele frequency. However, no functional evaluation has been performed.
ENSG00000168772	CXXC4	protein_coding	https://link.springer.com/referenceworkentry/10.1007%2F978-3-319-20796-4_24-1	TET2 that lacks this domain is targeted by its partner CXXC4, a zinc finger
ENSG00000168769	TET2	protein_coding	https://www.ncbi.nlm.nih.gov/pubmed/29466726	Here we report that the enzyme ten eleven translocation methylcytosine dioxygenase 2 (Tet2), which catalyzes the production of 5-hydroxymethylcytosine (5hmC), rescues age-related decline in adult neurogenesis and enhances cognition in mice.		https://www.sciencedirect.com/science/article/pii/S0925443917303320	Whole genome DNA sequencing data of 218 subjects in the Leiden Longevity Study (LLS) at a mean age of 94 years (88–103) and 646 subjects from the Rotterdam study at a mean age of 84 years (80–105), revealed somatic mutations in genes previously linked to hematopoietic malignancies, especially in DNMT3A and TET2 [36]. ....The somatic mutations in DNMT3A and TET2 are quantitative genetic markers of…
ENSG00000138777	PPA2	protein_coding	https://www.ncbi.nlm.nih.gov/pubmed/31082499	we identified three deletion mutants of mitochondrial metabolism genes (ppa2∆, dss1∆, and afg3∆) that live longer than wild-type cells		http://genomics.senescence.info/genes/details.php?gene=PPA2&organism=cerevisiae	Mean chronological lifespan decreased in the a strain
ENSG00000236699	ARHGEF38	protein_coding
ENSG00000138785	INTS12	protein_coding	https://academic.oup.com/gerontologist/article/56/Suppl_2/S218/2605307	Table 2. Summary of Key Gene Association Studies of Genetic Influences on Functional Capacity. Hancock et al. (2010) European descent GWAS N = 20,890 (from four studies) FEV 1 NPNT INTS12 FLJ20184 GSTCD Two SNPs identified near each of the NPNT , INTS12 , FLJ0184 , and GSTCD gene loci (all on chr. 4) related to FEV 1		https://handls.nih.gov/pubs/2019-Prince-Aging-epub.pdf	Supplementary Table 1. Genes significantly different between non-frail and frail individuals. see INTS12		https://www.ncbi.nlm.nih.gov/pmc/articles/PMC2832852/	We meta-analyzed genome-wide association studies for two clinically important measures, forced expiratory volume in the first second (FEV1).... one locus associated with FEV1 (INTS12-GSTCD-NPNT) at or near genome-wide significance (P<5×10−8) in CHARGE;
ENSG00000138780	GSTCD	protein_coding	https://academic.oup.com/gerontologist/article/56/Suppl_2/S218/2605307	Table 2. Summary of Key Gene Association Studies of Genetic Influences on Functional Capacity. Hancock et al. (2010) European descent GWAS N = 20,890 (from four studies) FEV 1 NPNT INTS12 FLJ20184 GSTCD Two SNPs identified near each of the NPNT , INTS12 , FLJ0184 , and GSTCD gene loci (all on chr. 4) related to FEV 1
ENSG00000168743	NPNT	protein_coding	https://www.nature.com/articles/srep36210	Intriguingly, the gene expression of NPNT is reduced in the bone of C57BL/6J ovariectomised mice and in osteoporosis patients.		https://www.researchgate.net/publication/47555739_The_secreted_integrin_ligand_nephronectin_is_necessary_for_forelimb_formation_in_Xenopus_tropicalis	secreted integrin ligand nephronectin
ENSG00000145348	TBCK	protein_coding
ENSG00000164022	AIMP1	protein_coding	https://www.ncbi.nlm.nih.gov/pubmed/29921010	AdP treatment induced the collagen type I synthesis and fibroblast proliferation.		https://www.ncbi.nlm.nih.gov/pmc/articles/PMC5959800/
ENSG00000250298	GIMD1	protein_coding
ENSG00000155011	DKK2	protein_coding	https://www.cell.com/developmental-cell/pdf/S1534-5807(15)00361-5.pdf	Wnt inhibitor dkk2														https://www.ncbi.nlm.nih.gov/pmc/articles/PMC3894567/	we identified a novel intergenic SNP rs7680468 located near PAPSS1 and DKK2 on 4q25 (p = 4.7E-8).
ENSG00000138801	PAPSS1	protein_coding	see next tab	pps-1 shortened lifespan														https://www.ncbi.nlm.nih.gov/pmc/articles/PMC3894567/	we identified a novel intergenic SNP rs7680468 located near PAPSS1 and DKK2 on 4q25 (p = 4.7E-8).
ENSG00000164023	SGMS2	protein_coding	https://insight.jci.org/articles/view/126180	"Mutations of the gene SGMS2 were identified as the cause of the disease….we found four additional families with mutations in the same gene resulting in either osteoporosis...https://www.sciencedaily.com/releases/2019/02/190225145647.htm
ENSG00000155016	CYP2U1	protein_coding	https://www.ncbi.nlm.nih.gov/pubmed/25409777	identify novel genetic variants associated with lung function in the Long Life Family Study (LLFS) (n = 3,899)...We identified nine SNPs in strong linkage disequilibrium in the CYP2U1 gene to be associated with FEV1		https://www.researchgate.net/publication/293803388_Genes_and_Pathways_That_Influence_Longevity_in_Caenorhabditis_elegans	cyp2u1 predicts t be daf-9		see next tab	cyp-23A1 extended dauer lifspan; cyp-33E2 extended lifespan
ENSG00000138796	HADH	protein_coding
ENSG00000138795	LEF1	protein_coding	https://www.ncbi.nlm.nih.gov/pmc/articles/PMC2673053/	Thus, our results indicate an age- and gender-dependent role for Lef1 in regulating bone formation and bone mass in vivo.
ENSG00000109475	RPL34	protein_coding	http://genomics.senescence.info/genes/details.php?id=562	In other ribosomal proteins, e.g., Rpl34, loss of either of the Rpl34 paralogs promotes longevity (Steffen et al., 2012).		see next tab	rpl-34 extended life span
ENSG00000198856	OSTC	protein_coding
ENSG00000164089	ETNPPL	protein_coding
ENSG00000188517	COL25A1	protein_coding	PMID 27114037, 21782286, 28329165, SNPs in next tab.			https://arthritis-research.biomedcentral.com/articles/10.1186/ar4278	In comparison, there was an increase in only three ECM genes (COL10A1, COL25A1 and lubricin) together with a single growth factor (fibroblast growth factor 9) in older donors (Table 4).											Pirazzini C, Bacalini MG, Marasco E, (and 19 more) ; Aging (Albany NY) (2018); PMID: 30089705	In Class C, we also identified a SNP (rs17596705) located in COL25A1 a gene identified in the rare variant analysis conducted by Erikson and colleagues, who sequenced the whole genomes of individuals >80 years old with no chronic diseases.
ENSG00000138802	SEC24B	protein_coding
ENSG00000005059	MCUB	protein_coding
ENSG00000138794	CASP6	protein_coding
ENSG00000123739	PLA2G12A	protein_coding
ENSG00000205403	CFI	protein_coding
ENSG00000109534	GAR1	protein_coding	https://www.ncbi.nlm.nih.gov/pubmed/18523010	autosomal recessive dyskeratosis congenita but have not found any GAR1 mutations.														https://link.springer.com/article/10.1007/s11357-011-9340-3	1 snp in gar1 see table 2
ENSG00000180245	RRH	protein_coding
ENSG00000183423	LRIT3	protein_coding
ENSG00000138798	EGF	protein_coding	https://www.ncbi.nlm.nih.gov/pmc/articles/PMC3227454/	ce lifespan		https://www.ncbi.nlm.nih.gov/pmc/articles/PMC4841623/
ENSG00000170522	ELOVL6	protein_coding	https://www.ncbi.nlm.nih.gov/pmc/articles/PMC3407776/	To be noted, the 4q25 locus harbours elongation of very long chain fatty acids protein 6 (ELOVL6), the elongase that transforms C16:0 into C18:0 and C16:1 into C18:1. Polymorphisms in this gene have been associated with insulin sensitivity; a mouse deficient for this gene carried high doses of C16:1 (palmitoleic acid) and did not acquire insulin resistance after a high-fat diet [54,55]. C16:1 has…		https://www.ncbi.nlm.nih.gov/pubmed/18160025	Fatty acid profile of erythrocyte membranes as possible biomarker of longevity.		see next tab	elo-2 extended life span								https://academic.oup.com/biomedgerontology/article/72/11/1453/3072309	The SNP rs28391193 in chromosome 4 is a rare variant in whites (MAF = 0.007 in whites from dbSNP) that became more prevalent in the extreme old, although the prevalence was still very low (MAF = 0.02 in LLFS and NECS centenarians, 0.05 in LGP centenarians, and 0.04 in SICS centenarians). This SNP is an eQTL for ELOVL6 in whole blood (Supplementary Figure 3F), a fatty acid elongase in the 4q25 pre…
ENSG00000138792	ENPEP	protein_coding
ENSG00000164093	PITX2	protein_coding
ENSG00000249885	ARHGEF38-IT1	sense_intronic
ENSG00000252136	SNORA31	snoRNA
ENSG00000199894	snoU2_19	snoRNA
ENSG00000252460	RNU6-635P	snRNA
ENSG00000251906	RNU6-351P	snRNA
ENSG00000200917	RNU6-553P	snRNA
ENSG00000252470	RNU6-551P	snRNA
ENSG00000222691	RNU6-733P	snRNA
ENSG00000206601	RNU6-431P	snRNA
ENSG00000207260	RNU6-35P	snRNA
ENSG00000212160	RNU6-205P	snRNA
ENSG00000200963	RNU6-289P	snRNA
ENSG00000278589	ZACNP1	unprocessed_pseudogene

## Sheet: COL25A1 SNPs
Jan :We need to make a proper table out of this but below are the SNPs I found. Would then also be great to have all your SNPs in of longevity vs diseases and then update your schematic of COL25A1 with all SNP.
Human Orthologue	Protein Name	SNP/Genes associated with Human Longevity	Reference (PMID)
COL25A1	Collagen, type XXV, alpha 1	chr4:109745309 A>C (p.H622Q)	27114037
		chr4:109766364 G>A (p.P520L)	21782286
		chr4:109782121 G>A	28329165
		(pR402C)
		chr4:109783680 T>C
		(p.T392A)
		chr4:109858999 C>A
		(p.G225C)
		chr4:109862574 T>C
		(p.N171S)
		chr4:110221759 G>A
		(p.S116L)
		chr4:110222997 T>C
		(p.Q60R)
		chr4:110223033 G>A
		(p. S48F)
		rs3128591	Intron
		rs28391193	no Col25 connection
COL25A1 SNP associated with diseases
Analysis of Alzheimer’s disease SNPs
Rs2075650 has consistently been associated with an increased risk of Alzheimer’s disease in several independent GWAS studies (Harold et al., 2009; Lambert et al., 2009; Seshadri et al., 2010). Therefore, we studied the effect of SNPs present in the AlzGene database [http://www.alzgene.org/, (Bertram et al., 2007)], on survival into old age in the LLS GWAS. Apart from rs2075650, none of the 751 me…
Table S4 from https://doi.org/10.1111/j.1474-9726.2011.00705.x								Does this mean it is NOT significant for Alzheimer or into old age? (Howeverm from the Alzgene website we could get the Alzheimer COL25SNP
Table S4 Association of Leiden Longevity Study (LLS) GWAS SNPs selected from the AlzGene database [http://www.alzgene.org/, (Bertram et al. 2007)] with survival into old age.
SNP	Chra	Positionb	MAF (LLS GWAS cases)c	MAF (RS GWAS controls)d	Minor Allele (RS GWAS controls)e	ORf	95% CIg	Ptrendh	Gene Downstream	Distance (Bp)	Gene Upstream	Distance (Bp)
rs1364842	4	110076525	0.1973	0.21	A	0.923709	0.76 - 1.12	0.421745	COL25A1	0			Intron
rs17531474	4	110082819	0.1228	0.1365	A	0.888502	0.71 - 1.12	0.312119	COL25A1	0
aChr; Chromosome position according to NCBI Build 36. bPosition; Position according to dbSNP Build 129. cMAF (LLS GWAS cases); Minor allele frequency in the LLS GWAS cases. dMAF (RS GWAS controls); Minor allele frequency in the RS GWAS controls. eMinor Allele (RS GWAS controls); Allele with the lowest frequency in the RS GWAS controls. fOR; Odds Ratio. OR’s above 1 indicate the increased probabil…
Srs13134663, in the collagen XXV alpha 1 gene (COL25A1) was significantly associated with ASPD in both African					Intron
From the Broadinstitute
COL25A1 | gnomAD v4.1.0 | gnomAD (broadinstitute.org)
There is only on pathogenic missense mutation. (G382R) which we have in our figure
COL25A1 | gnomAD v4.1.0 | gnomAD (broadinstitute.org)
Pathogenic
VCV000180690.1 - ClinVar - NCBI (nih.gov)
Submissions - Germline
Classification Help	Review status Help	Condition Help	Submitter Help	More information Help
(Last evaluated)	(Assertion criteria)
Pathogenic		FIBROSIS OF EXTRAOCULAR MUSCLES, CONGENITAL, 5	OMIM	Publications:
(Jan 08, 2015)	Method: literature only	Affected status: not provided	Accession: SCV000207602.1	PubMed (1
		Allele origin: germline	First in ClinVar: Feb 15, 2015
			Last updated: Feb 15, 2015
haben wir R128N
From <https://www.ncbi.nlm.nih.gov/clinvar/variation/180690/>
G382R
Likely pahtogenic
Conditions - Germline
Condition Help	Classification Help	Review status Help	Last evaluated Help	Variation/condition record Help
	(# of submissions)
Fibrosis of extraocular muscles, congenital, 5	Likely pathogenic (1)		Jul 30, 2019	RCV001780813.4
Uninteressant da R128Ter, das heißt quasi knockout. Kein "tradiotioneller SNP"
From <https://www.ncbi.nlm.nih.gov/clinvar/variation/1324108/>
Conditions - Germline
Condition Help	Classification Help	Review status Help	Last evaluated Help	Variation/condition record Help
	(# of submissions)
Fibrosis of extraocular muscles, congenital, 5	Likely pathogenic (1)		Feb 2, 2022	RCV002272850.2
From <https://www.ncbi.nlm.nih.gov/clinvar/variation/1698993/>
Addition of 1 base - hard to interpret
these once are from Cyril arastu paper
pre_processed_disease_term	gene	hgsv	ref	source	processed_disease_term	OMIM	all_cui
FIBROSIS OF EXTRAOCULAR MUSCLES, CONGENITAL, 5	COL25A1	p.gly382arg		ClinVar/OMIM	FIBROSIS OF EXTRAOCULAR MUSCLES, CONGENITAL, 5	0	C1302995
FIBROSIS OF EXTRAOCULAR MUSCLES, CONGENITAL, 5	COL25A1	p.gly497ter		ClinVar/OMIM	FIBROSIS OF EXTRAOCULAR MUSCLES, CONGENITAL, 5	0	C1302995
Autism spectrum disorder	COL25A1	p.glu351aspfs	Iossifov (2014) Nature 515, 216O'Roak (2012) Nature 485: 246 [Additional report]	HGMD	Autism spectrum disorder	0	C1845243;C0524528
Cranial dysinnervation disorder	COL25A1	p.gly382arg	Shinwari (2015) Am J Hum Genet 96, 147Khan (2015) J AAPOS 19: 463 [Additional case report]	HGMD	Cranial dysinnervation disorder	0	0
Cranial dysinnervation disorder	COL25A1	p.gly497*	Shinwari (2015) Am J Hum Genet 96, 147Khan (2015) J AAPOS 19: 463 [Additional case report]	HGMD	Cranial dysinnervation disorder	0	0
Fibrosis of extraocular muscles, congenital, 5 (CFEOM5) [MIM:616219]	COL25A1	p.gly382arg		UniProt	Fibrosis of extraocular muscles, congenital, 5	616219	C4015552
Addition from E-mail
y chance, I stumbled over a new a new SNP (rs17596705) located in COL25A1 in a Italian cohort.DOI: 10.18632/aging.101515... please add this and other snps to the schematic.
This is a Pro->Pro SNP -

## Sheet: humanCOL25A1 SNPs
Residue	AA effect	Association	SNP	Column2	Column3	link	DOI	Kommentar
128	R128N	Cogenital Cranial Disorder				https://dx.doi.org/10.1016/j.ajhg.2014.11.006	10.1016/j.ajhg.2014.11.006
382	G382R	congenital cranial dysinnervation disorder			VCV000180691	https://dx.doi.org/ 10.1016/j.ajhg.2014.11.006	10.1016/j.ajhg.2014.11.006
497	G497*	congenital cranial dysinnervation disorder			VCV000180690	https://dx.doi.org/ 10.1016/j.ajhg.2014.11.006	10.1016/j.ajhg.2014.11.006
	CNV deletion	congenital cranial dysinnervation disorder				https://dx.doi.org/ 10.1016/j.ajhg.2014.11.006	10.1016/j.ajhg.2014.11.006
48	S48F	Longevity				https://dx.doi.org/10.1016/j.cell.2016.03.022	10.1016/j.cell.2016.03.022
60	Q60R	Longevity				https://dx.doi.org/10.1016/j.cell.2016.03.022	10.1016/j.cell.2016.03.022
60	Q60R	Longevity				https://dx.doi.org/10.1371/journal.pone.0112430	10.1371/journal.pone.0112430
116	S116L	Longevity				https://dx.doi.org/10.1016/j.cell.2016.03.022	10.1016/j.cell.2016.03.022
171	N171S	Longevity				https://dx.doi.org/10.1016/j.cell.2016.03.022	10.1016/j.cell.2016.03.022
183	V183I	Longevity				https://dx.doi.org/10.1371/journal.pone.0112430	10.1371/journal.pone.0112430	only exists in alternative spliced collagen XXV
225	G225C	Longevity				https://dx.doi.org/10.1016/j.cell.2016.03.022	10.1016/j.cell.2016.03.022
392	T392A	Longevity				https://dx.doi.org/10.1016/j.cell.2016.03.022	10.1016/j.cell.2016.03.022
402	R402C	Longevity				https://dx.doi.org/10.1016/j.cell.2016.03.022	10.1016/j.cell.2016.03.022
520	P520L	Longevity				https://dx.doi.org/10.1016/j.cell.2016.03.022	10.1016/j.cell.2016.03.022
622	H622Q	Longevity				https://dx.doi.org/10.1016/j.cell.2016.03.022	10.1016/j.cell.2016.03.022	only exists in alternative spliced collagen XXV
102	Y102C	uncertain significance	rs1402830811			https://www.ncbi.nlm.nih.gov/snp/rs1402830811		Sollen wir die aufnahmen? Gibt keine richtige Klinik zu
570	R570K	uncertain significance				https://dx.doi.org/SNP finde ich nicht wieder...	SNP finde ich nicht wieder...	Sollen wir die aufnahmen? Gibt keine richtige Klinik zu
599	F599L	uncertain significance	rs766049644		VCV000452083	https://www.ncbi.nlm.nih.gov/snp/rs766049644		Sollen wir die aufnahmen? Gibt keine richtige Klinik zu
351	E351#					https://dx.doi.org/C.E. private communication	C.E. private communication	Collin, dieser SNP komm von Dir?

## Sheet: Celegans ortholog proteins
WormBase ID	Common Name	Locus ID	Ensembl ID	HGNC Symbol	No. of Databases	Matched Databases	Ahringer Location		Your Input	WormBase Gene ID	Public Name	Sequence Name	RNAi Phenotype Observed	Allele Phenotype Observed	Interacting Gene	Expr_pattern Tissue	Concise Description	Automated Description
WBGene00000373	cyp-14A5	F08F3.7	ENSG00000155016	CYP2U1	3	Ensembl Compara 87-89|InParanoid|OrthoMCL	V-4A06		WBGene00000373	WBGene00000373	cyp-14A5	F08F3.7	short defecation cycle	metabolic pathway variant	clk-1(Genetic)	N.A.	cyp-14A5 encodes one of ~80 C. elegans cytochrome P450s: membrane-associated, heme-containing NADPH-dependent monooxygenases that catalyze the oxidative metabolism of a variety of exogenous compounds and endogenous substrates\; cyp-14A5 expression is upregulated in response to stressors such as ionizing radiation and bacterial infection.	Is an ortholog of human CYP2U1 (cytochrome P450 family 2 subfamily U member 1). Is predicted to have heme binding activity\; iron ion binding activity\; and oxidoreductase activity. Is involved in response to gamma radiation. Human ortholog(s) of this gene are implicated in hereditary spastic paraplegia 56\; lung cancer\; and rickets.
WBGene00010589	cyp-33D1	K05D4.4	ENSG00000155016	CYP2U1	3	Ensembl Compara 87-89|OrthoInspector|OrthoMCL	V-10F02		WBGene00010589	WBGene00010589	cyp-33D1	K05D4.4	short defecation cycle	N.A.	clk-1(Genetic), C30F12.4(Physical)	N.A.	N.A.	Is an ortholog of human CYP2J2 (cytochrome P450 family 2 subfamily J member 2). Is predicted to have heme binding activity\; oxidoreductase activity, acting on paired donors, with incorporation or reduction of molecular oxygen, reduced flavin or flavoprotein as one donor, and incorporation of one atom of oxygen\; and steroid hydroxylase activity. Human ortholog(s) of this gene are implicated in h…
WBGene00010705	cyp-14A1	K09A11.2	ENSG00000155016	CYP2U1	3	Ensembl Compara 87-89|InParanoid|OrthoMCL	X-6A04		WBGene00010705	WBGene00010705	cyp-14A1	K09A11.2	N.A.	N.A.	N.A.	N.A.	cyp-14A1 encodes one of ~80 C. elegans cytochrome P450s: membrane-associated, heme-containing NADPH-dependent monooxygenases that catalyze the oxidative metabolism of a variety of exogenous compounds and endogenous substrates.	Is an ortholog of human CYP2D6 (cytochrome P450 family 2 subfamily D member 6) and CYP2U1 (cytochrome P450 family 2 subfamily U member 1). Is predicted to have heme binding activity\; iron ion binding activity\; and oxidoreductase activity. Human ortholog(s) of this gene are implicated in hereditary spastic paraplegia 56\; lung cancer\; and rickets.
WBGene00010706	cyp-14A2	K09A11.3	ENSG00000155016	CYP2U1	4	Ensembl Compara 87-89|InParanoid|OrthoInspector|OrthoMCL	X-6A06		WBGene00010706	WBGene00010706	cyp-14A2	K09A11.3	organism oxidative stress response hypersensitive, paraquat hypersensitive	N.A.	N.A.	intestine	cyp-14A2 encodes one of ~80 C. elegans cytochrome P450s: membrane-associated, heme-containing NADPH-dependent monooxygenases that catalyze the oxidative metabolism of a variety of exogenous compounds and endogenous substrates.	Is an ortholog of human CYP2U1 (cytochrome P450 family 2 subfamily U member 1). Is predicted to have heme binding activity\; iron ion binding activity\; and oxidoreductase activity. Is expressed in intestine. Human ortholog(s) of this gene are implicated in hereditary spastic paraplegia 56\; lung cancer\; and rickets.
WBGene00010707	cyp-14A3	K09A11.4	ENSG00000155016	CYP2U1	4	Ensembl Compara 87-89|InParanoid|OrthoInspector|OrthoMCL	X-6A08		WBGene00010707	WBGene00010707	cyp-14A3	K09A11.4	N.A.	N.A.	N.A.	head neuron, intestine, nervous system, PVT, rectal gland cell, tail neuron	cyp-14A3 encodes one of ~80 C. elegans cytochrome P450s: membrane-associated, heme-containing NADPH-dependent monooxygenases that catalyze the oxidative metabolism of a variety of exogenous compounds and endogenous substrates\; large-scale expression studies reveal cyp-14A3 expression in the intestine and some neurons\; cyp-14A3 expression is upregulated in response to the tetrachlorobiphenyl PCB…	Is an ortholog of human CYP2C8 (cytochrome P450 family 2 subfamily C member 8) and CYP2U1 (cytochrome P450 family 2 subfamily U member 1). Is predicted to have heme binding activity\; iron ion binding activity\; and oxidoreductase activity. Human ortholog(s) of this gene are implicated in hereditary spastic paraplegia 56\; lung cancer\; and rickets.
WBGene00011009	cyp-14A4	R04D3.1	ENSG00000155016	CYP2U1	2	Ensembl Compara 87-89|InParanoid	X-6A12		WBGene00011009	WBGene00011009	cyp-14A4	R04D3.1	engulfment variant	N.A.	N.A.	intestine	cyp-14A4 encodes one of ~80 C. elegans cytochrome P450s: membrane-associated, heme-containing NADPH-dependent monooxygenases that catalyze the oxidative metabolism of a variety of exogenous compounds and endogenous substrates.	Is an ortholog of several human genes including CYP2C8 (cytochrome P450 family 2 subfamily C member 8)\; CYP2C9 (cytochrome P450 family 2 subfamily C member 9)\; and CYP2D7 (cytochrome P450 family 2 subfamily D member 7 (gene\/pseudogene)). Is predicted to have heme binding activity\; iron ion binding activity\; and oxidoreductase activity. Is expressed in intestine. Human ortholog(s) of this gen…
WBGene00012448	cyp-33D3	Y17D7A.4	ENSG00000155016	CYP2U1	3	Ensembl Compara 87-89|OrthoInspector|OrthoMCL	V-16C14		WBGene00012448	WBGene00012448	cyp-33D3	Y17D7A.4	transgene expression reduced	N.A.	cdc-48.2(Genetic), ckb-2(Regulatory)	N.A.	N.A.	Is an ortholog of human CYP2J2 (cytochrome P450 family 2 subfamily J member 2). Is predicted to have heme binding activity\; oxidoreductase activity, acting on paired donors, with incorporation or reduction of molecular oxygen, reduced flavin or flavoprotein as one donor, and incorporation of one atom of oxygen\; and steroid hydroxylase activity. Human ortholog(s) of this gene are implicated in h…
WBGene00015135	cyp-23A1	B0304.3	ENSG00000155016	CYP2U1	2	Ensembl Compara 87-89|OrthoInspector	II-3J08		WBGene00015135	WBGene00015135	cyp-23A1	B0304.3	dauer lifespan extended, locomotion variant	N.A.	N.A.	N.A.	cyp-23A1 encodes a cytochrome P450 homologous to the human gene CYP7B1, which when mutated leads to giant cell hepatitis (OMIM:231100)\; as a cytochrome P450, CYP-23A1 is predicted to function as a membrane-associated, heme-containing NADPH-dependent monooxygenases that catalyzes the oxidative metabolism of a variety of exogenous compounds and endogenous substrates.	Is an ortholog of human CYP2J2 (cytochrome P450 family 2 subfamily J member 2). Is predicted to have heme binding activity\; oxidoreductase activity, acting on paired donors, with incorporation or reduction of molecular oxygen, reduced flavin or flavoprotein as one donor, and incorporation of one atom of oxygen\; and steroid hydroxylase activity. Human ortholog(s) of this gene are implicated in h…
WBGene00015709	cyp-33A1	C12D5.7	ENSG00000155016	CYP2U1	2	Ensembl Compara 87-89|OrthoInspector	V-5H23		WBGene00015709	WBGene00015709	cyp-33A1	C12D5.7	N.A.	N.A.	swsn-7(Regulatory)	N.A.	N.A.	Is an ortholog of human CYP2J2 (cytochrome P450 family 2 subfamily J member 2). Is predicted to have heme binding activity\; oxidoreductase activity, acting on paired donors, with incorporation or reduction of molecular oxygen, reduced flavin or flavoprotein as one donor, and incorporation of one atom of oxygen\; and steroid hydroxylase activity. Human ortholog(s) of this gene are implicated in h…
WBGene00016092	cyp-33B1	C25E10.2	ENSG00000155016	CYP2U1	2	Ensembl Compara 87-89|OrthoInspector	V-6I24		WBGene00016092	WBGene00016092	cyp-33B1	C25E10.2	N.A.	N.A.	N.A.	N.A.	N.A.	Is an ortholog of human CYP2J2 (cytochrome P450 family 2 subfamily J member 2). Is predicted to have heme binding activity\; oxidoreductase activity, acting on paired donors, with incorporation or reduction of molecular oxygen, reduced flavin or flavoprotein as one donor, and incorporation of one atom of oxygen\; and steroid hydroxylase activity. Human ortholog(s) of this gene are implicated in h…
WBGene00016686	cyp-33C1	C45H4.2	ENSG00000155016	CYP2U1	3	Ensembl Compara 87-89|OrthoInspector|OrthoMCL	V-2E07		WBGene00016686	WBGene00016686	cyp-33C1	C45H4.2	N.A.	N.A.	N.A.	N.A.	N.A.	Is an ortholog of human CYP2J2 (cytochrome P450 family 2 subfamily J member 2). Is predicted to have heme binding activity\; oxidoreductase activity, acting on paired donors, with incorporation or reduction of molecular oxygen, reduced flavin or flavoprotein as one donor, and incorporation of one atom of oxygen\; and steroid hydroxylase activity. Human ortholog(s) of this gene are implicated in h…
WBGene00016697	cyp-33C2	C45H4.17	ENSG00000155016	CYP2U1	3	Ensembl Compara 87-89|OrthoInspector|OrthoMCL	V-2G11|V-2G23		WBGene00016697	WBGene00016697	cyp-33C2	C45H4.17	N.A.	N.A.	N.A.	intestine	N.A.	Is an ortholog of human CYP2J2 (cytochrome P450 family 2 subfamily J member 2). Is predicted to have heme binding activity\; oxidoreductase activity, acting on paired donors, with incorporation or reduction of molecular oxygen, reduced flavin or flavoprotein as one donor, and incorporation of one atom of oxygen\; and steroid hydroxylase activity. Is expressed in intestine. Human ortholog(s) of th…
WBGene00016768	cyp-33E1	C49C8.4	ENSG00000155016	CYP2U1	3	Ensembl Compara 87-89|OrthoInspector|OrthoMCL	IV-4K12		WBGene00016768	WBGene00016768	cyp-33E1	C49C8.4	long defecation cycle	N.A.	clk-1(Genetic)	intestine	N.A.	Is an ortholog of human CYP2J2 (cytochrome P450 family 2 subfamily J member 2). Is predicted to have heme binding activity\; oxidoreductase activity, acting on paired donors, with incorporation or reduction of molecular oxygen, reduced flavin or flavoprotein as one donor, and incorporation of one atom of oxygen\; and steroid hydroxylase activity. Human ortholog(s) of this gene are implicated in h…
WBGene00016860	cyp-33C9	C50H11.15	ENSG00000155016	CYP2U1	2	Ensembl Compara 87-89|OrthoInspector	V-14D03		WBGene00016860	WBGene00016860	cyp-33C9	C50H11.15	N.A.	organism hypersensitive desiccation	N.A.	N.A.	N.A.	Is an ortholog of human CYP2J2 (cytochrome P450 family 2 subfamily J member 2). Is predicted to have heme binding activity\; oxidoreductase activity, acting on paired donors, with incorporation or reduction of molecular oxygen, reduced flavin or flavoprotein as one donor, and incorporation of one atom of oxygen\; and steroid hydroxylase activity. Human ortholog(s) of this gene are implicated in h…
WBGene00018260	cyp-33C7	F41B5.2	ENSG00000155016	CYP2U1	3	Ensembl Compara 87-89|OrthoInspector|OrthoMCL	V-2K07		WBGene00018260	WBGene00018260	cyp-33C7	F41B5.2	cadmium hypersensitive, slow growth	N.A.	N.A.	N.A.	N.A.	Is an ortholog of human CYP2J2 (cytochrome P450 family 2 subfamily J member 2). Is predicted to have heme binding activity\; oxidoreductase activity, acting on paired donors, with incorporation or reduction of molecular oxygen, reduced flavin or flavoprotein as one donor, and incorporation of one atom of oxygen\; and steroid hydroxylase activity. Human ortholog(s) of this gene are implicated in h…
WBGene00018261	cyp-33C5	F41B5.3	ENSG00000155016	CYP2U1	3	Ensembl Compara 87-89|OrthoInspector|OrthoMCL	V-2K09		WBGene00018261	WBGene00018261	cyp-33C5	F41B5.3	cadmium hypersensitive, short defecation cycle, slow growth	N.A.	clk-1(Genetic)	N.A.	N.A.	Is an ortholog of human CYP2J2 (cytochrome P450 family 2 subfamily J member 2). Is predicted to have heme binding activity\; oxidoreductase activity, acting on paired donors, with incorporation or reduction of molecular oxygen, reduced flavin or flavoprotein as one donor, and incorporation of one atom of oxygen\; and steroid hydroxylase activity. Human ortholog(s) of this gene are implicated in h…
WBGene00018262	cyp-33C3	F41B5.4	ENSG00000155016	CYP2U1	3	Ensembl Compara 87-89|OrthoInspector|OrthoMCL	V-2K11		WBGene00018262	WBGene00018262	cyp-33C3	F41B5.4	transgene expression reduced	N.A.	N.A.	N.A.	N.A.	Is an ortholog of human CYP2J2 (cytochrome P450 family 2 subfamily J member 2). Is predicted to have heme binding activity\; oxidoreductase activity, acting on paired donors, with incorporation or reduction of molecular oxygen, reduced flavin or flavoprotein as one donor, and incorporation of one atom of oxygen\; and steroid hydroxylase activity. Human ortholog(s) of this gene are implicated in h…
WBGene00018264	cyp-33C6	F41B5.7	ENSG00000155016	CYP2U1	3	Ensembl Compara 87-89|OrthoInspector|OrthoMCL	V-2K17		WBGene00018264	WBGene00018264	cyp-33C6	F41B5.7	short defecation cycle	N.A.	clk-1(Genetic)	N.A.	N.A.	Is an ortholog of human CYP2J2 (cytochrome P450 family 2 subfamily J member 2). Is predicted to have heme binding activity\; oxidoreductase activity, acting on paired donors, with incorporation or reduction of molecular oxygen, reduced flavin or flavoprotein as one donor, and incorporation of one atom of oxygen\; and steroid hydroxylase activity. Human ortholog(s) of this gene are implicated in h…
WBGene00018333	cyp-33E3	F42A9.4	ENSG00000155016	CYP2U1	1	Ensembl Compara 87-89	IV-4I20		WBGene00018333	WBGene00018333	cyp-33E3	F42A9.4	N.A.	N.A.	egl-9(Genetic)	N.A.	N.A.	Is an ortholog of human CYP21A2 (cytochrome P450 family 21 subfamily A member 2). Is predicted to have heme binding activity\; oxidoreductase activity, acting on paired donors, with incorporation or reduction of molecular oxygen, reduced flavin or flavoprotein as one donor, and incorporation of one atom of oxygen\; and steroid hydroxylase activity. Human ortholog(s) of this gene are implicated in…
WBGene00018334	cyp-33E2	F42A9.5	ENSG00000155016	CYP2U1	3	Ensembl Compara 87-89|OrthoInspector|OrthoMCL	IV-4I22		WBGene00018334	WBGene00018334	cyp-33E2	F42A9.5	extended life span, paraquat resistant, pharyngeal pumping reduced, reduced brood size	N.A.	N.A.	e1, e2, e3, marginal cell, mc1DL, mc1DR, mc1V, mc2, mc3, metacorpus, pharyngeal epithelial cell, pharyngeal muscle cell, pharyngeal-intestinal valve, pharynx, pm2, procorpus	cyp-33E2 encodes a cytochrome P450\; when co-expressed with human CPR in vitro, CYP-33E2 exhibits monooxygenase activity on a variety of long-chain fatty acid substrates, including eicosapentaenoic acid and arachidonic acid\; cyp-33E2(RNAi) animals show reduced rates of pharyngeal pumping, suggesting that CYP-33E2-generated metabolites may play a role in regulating pharyngeal muscle contraction\;…	Is an ortholog of human CYP2J2 (cytochrome P450 family 2 subfamily J member 2). Exhibits monooxygenase activity. Is involved in long-chain fatty acid metabolic process and regulation of pharyngeal pumping. Localizes to the intracellular membrane-bounded organelle. Is expressed in pharynx. Human ortholog(s) of this gene are implicated in hereditary spastic paraplegia 56\; lung cancer\; and rickets.
WBGene00018413	cyp-33C4	F44C8.1	ENSG00000155016	CYP2U1	3	Ensembl Compara 87-89|OrthoInspector|OrthoMCL	V-2I07		WBGene00018413	WBGene00018413	cyp-33C4	F44C8.1	N.A.	N.A.	N.A.	N.A.	N.A.	Is an ortholog of human CYP2J2 (cytochrome P450 family 2 subfamily J member 2). Is predicted to have heme binding activity\; oxidoreductase activity, acting on paired donors, with incorporation or reduction of molecular oxygen, reduced flavin or flavoprotein as one donor, and incorporation of one atom of oxygen\; and steroid hydroxylase activity. Human ortholog(s) of this gene are implicated in h…
WBGene00019967	cyp-33C8	R08F11.3	ENSG00000155016	CYP2U1	3	Ensembl Compara 87-89|OrthoInspector|OrthoMCL	V-14D13		WBGene00019967	WBGene00019967	cyp-33C8	R08F11.3	long defecation cycle	N.A.	tab-1(Physical), clk-1(Genetic)	N.A.	N.A.	Is an ortholog of human CYP2J2 (cytochrome P450 family 2 subfamily J member 2). Is predicted to have heme binding activity\; oxidoreductase activity, acting on paired donors, with incorporation or reduction of molecular oxygen, reduced flavin or flavoprotein as one donor, and incorporation of one atom of oxygen\; and steroid hydroxylase activity. Human ortholog(s) of this gene are implicated in h…
WBGene00021168	cyp-33C12	Y5H2B.6	ENSG00000155016	CYP2U1	2	Ensembl Compara 87-89|OrthoMCL	V-2G15		WBGene00021168	WBGene00021168	cyp-33C12	Y5H2B.6	locomotion variant	N.A.	N.A.	N.A.	N.A.	Is an ortholog of human CYP2J2 (cytochrome P450 family 2 subfamily J member 2). Is predicted to have heme binding activity\; oxidoreductase activity, acting on paired donors, with incorporation or reduction of molecular oxygen, reduced flavin or flavoprotein as one donor, and incorporation of one atom of oxygen\; and steroid hydroxylase activity. Human ortholog(s) of this gene are implicated in h…
WBGene00021710	cyp-33C11	Y49C4A.9	ENSG00000155016	CYP2U1	3	Ensembl Compara 87-89|OrthoInspector|OrthoMCL	V-15H24		WBGene00021710	WBGene00021710	cyp-33C11	Y49C4A.9	transgene expression reduced	N.A.	cdc-48.2(Genetic), ckb-2(Regulatory)	N.A.	N.A.	Is an ortholog of human CYP2J2 (cytochrome P450 family 2 subfamily J member 2). Is predicted to have heme binding activity\; oxidoreductase activity, acting on paired donors, with incorporation or reduction of molecular oxygen, reduced flavin or flavoprotein as one donor, and incorporation of one atom of oxygen\; and steroid hydroxylase activity. Human ortholog(s) of this gene are implicated in h…
WBGene00007913	cyp-36A1	C34B7.3	ENSG00000155016	CYP2U1	2	OrthoInspector|OrthoMCL	I-4I01		WBGene00007913	WBGene00007913	cyp-36A1	C34B7.3	metabolite content decreased	N.A.	gopc-1(Physical)	body wall musculature, hypodermis, intestine, neuron, vulval muscle	N.A.	Is an ortholog of several human genes including CYP2C8 (cytochrome P450 family 2 subfamily C member 8)\; CYP2C9 (cytochrome P450 family 2 subfamily C member 9)\; and CYP2D7 (cytochrome P450 family 2 subfamily D member 7 (gene\/pseudogene)). Is predicted to have heme binding activity\; oxidoreductase activity, acting on paired donors, with incorporation or reduction of molecular oxygen, reduced fl…
WBGene00020386	cyp-34A4	T09H2.1	ENSG00000155016	CYP2U1	1	OrthoInspector	V-3M02		WBGene00020386	WBGene00020386	dach-1	T09H2.1	short defecation cycle	N.A.	clk-1(Genetic)	N.A.	N.A.	Is an ortholog of human CYP21A2 (cytochrome P450 family 21 subfamily A member 2). Is predicted to have heme binding activity\; oxidoreductase activity, acting on paired donors, with incorporation or reduction of molecular oxygen, reduced flavin or flavoprotein as one donor, and incorporation of one atom of oxygen\; and steroid hydroxylase activity. Human ortholog(s) of this gene are implicated in…
WBGene00000674	col-99	F29C4.8	ENSG00000188517	COL25A1	1	Ensembl Compara 87-89	IV-1C21|IV-9N10		WBGene00000674	WBGene00000674	col-99	F29C4.8	N.A.	N.A.	smo-1(Physical)	anal depressor muscle, body wall musculature, head neuron, hypodermal cell, hypodermis, neuron, retrovesicular ganglion	N.A.	Is an ortholog of human COL13A1 (collagen type XIII alpha 1 chain). Is predicted to have extracellular matrix structural constituent. Localizes to the extracellular region\; neuromuscular junction\; and spanning component of plasma membrane. Is expressed in anal depressor muscle\; body wall musculature\; hypodermis\; neurons\; and retrovesicular ganglion.
WBGene00000708	col-135	M199.5	ENSG00000188517	COL25A1	2	Ensembl Compara 87-89|OMA	IV-9G17		WBGene00000708	WBGene00000708	col-135	M199.5	N.A.	N.A.	N.A.	N.A.	N.A.	Is predicted to have extracellular matrix structural constituent.
WBGene00003169	mec-5	E03G2.3	ENSG00000188517	COL25A1	1	Ensembl Compara 87-89	X-7C18		WBGene00003169	WBGene00003169	mec-5	E03G2.3	N.A.	lectin binding variant, mechanosensation variant, sluggish, touch resistant	mec-9(Genetic | Regulatory), mec-10(Genetic), mec-4(Genetic | Regulatory), mec-12(Genetic | Regulatory), mec-14(Genetic), mec-15(Genetic), mec-2(Genetic), mec-6(Genetic), mec-7(Genetic), mtd-1(Genetic), mec-1(Regulatory)	dorsal nerve cord, head, hypodermis, intestine, muscle cell, nervous system, seam cell, tail, touch receptor neuron, ventral cord neuron	mec-5 encodes a collagen unique in the number of Gly-X-Y repeats and in the composition of amino acids surrounding these repeats\; MEC-5 is required for normal mechanosensory response to gentle touch and for the proper functioning of the touch receptor neurons\; mec-5 interacts genetically with mec-4 and mec-10 which encode degenerins (ion channels) expressed in the touch neurons, mec-9, which en…	Is an ortholog of human COL1A2 (collagen type I alpha 2 chain). Is predicted to have extracellular matrix structural constituent. Is involved in several processes, including detection of mechanical stimulus involved in sensory perception of touch\; positive regulation of detection of mechanical stimulus involved in sensory perception of touch\; and positive regulation of mechanosensory behavior. …
WBGene00001157	ech-8	F01G10.2	ENSG00000138796	HADH	1	Ensembl Compara 87-89	IV-5M04		WBGene00001157	WBGene00001157	ech-8	F01G10.2	fat associated bodies increased, fat content increased	lethal, sterile	sup-46(Physical), secs-1(Physical), dnpp-1(Physical), F17E9.5(Physical), F55G1.9(Physical), F57C9.4(Physical), F59C12.3(Physical), H06I04.1(Physical), btb-10(Physical), R02F2.5(Physical), dhs-14(Physical), drp-1(Physical), pop-1(Physical), pie-1(Physical), gcl-1(Physical), ZC239.15(Physical), ZK121.2(Physical), smo-1(Physical)	N.A.	N.A.	Is an ortholog of human EHHADH (enoyl-CoA hydratase and 3-hydroxyacyl CoA dehydrogenase). Is predicted to have 3-hydroxyacyl-CoA dehydrogenase activity. Human ortholog(s) of this gene are implicated in Fanconi syndrome.
WBGene00001158	ech-9	F01G10.3	ENSG00000138796	HADH	1	Ensembl Compara 87-89	IV-5M06		WBGene00001158	WBGene00001158	ech-9	F01G10.3	N.A.	N.A.	nhr-49(Regulatory), ets-4(Regulatory)	N.A.	N.A.	Is an ortholog of human EHHADH (enoyl-CoA hydratase and 3-hydroxyacyl CoA dehydrogenase). Is predicted to have 3-hydroxyacyl-CoA dehydrogenase activity. Human ortholog(s) of this gene are implicated in Fanconi syndrome.
WBGene00007129	None	B0272.3	ENSG00000138796	HADH	6	Ensembl Compara 87-89|Homologene|InParanoid|OMA|OrthoInspector|OrthoMCL	X-4P13		WBGene00007129	WBGene00007129	B0272.3	B0272.3	N.A.	N.A.	smo-1(Physical), alg-1(Physical), pid-3(Physical)	anal depressor muscle, body wall musculature, Cell, intestine, nervous system, neuron, pharynx, reproductive system, seam cell, uterine muscle, vulval muscle	B0272.3 encodes a 3-hydroxyacyl-CoA dehydrogenase\; by homology, the product of B0272.3 is predicted to function in mitochondrial fatty acid metabolism by catalyzing the NAD+-dependent oxidation of short-chain hydroxyacyl CoAs\; large-scale expression studies indicate that B0272.3 is widely expressed.	Is an ortholog of human HADH (hydroxyacyl-CoA dehydrogenase). Is predicted to have 3-hydroxyacyl-CoA dehydrogenase activity and NAD+ binding activity. Is expressed widely. Human ortholog(s) of this gene are implicated in familial hyperinsulinemic hypoglycemia 4.
WBGene00010035	None	F54C8.1	ENSG00000138796	HADH	5	Ensembl Compara 87-89|Homologene|InParanoid|OrthoInspector|OrthoMCL	III-5C15		WBGene00010035	WBGene00010035	F54C8.1	F54C8.1	embryonic lethal, one cell arrest early emb	N.A.	F54C8.1(Physical), F54C8.1(Physical)	N.A.	N.A.	Is an ortholog of human HADH (hydroxyacyl-CoA dehydrogenase). Is predicted to have 3-hydroxyacyl-CoA dehydrogenase activity and NAD+ binding activity. Human ortholog(s) of this gene are implicated in familial hyperinsulinemic hypoglycemia 4.
WBGene00019978	hacd-1	R09B5.6	ENSG00000138796	HADH	1	Ensembl Compara 87-89	V-15B13		WBGene00019978	WBGene00019978	hacd-1	R09B5.6	N.A.	organism temperature response variant, tail morphology variant	nhr-49(Regulatory), ZK1307.8(Physical), kel-8(Physical)	N.A.	N.A.	Is predicted to have 3-hydroxyacyl-CoA dehydrogenase activity and NAD+ binding activity.
WBGene00001241	elo-3	D2024.3	ENSG00000170522	ELOVL6	5	Ensembl Compara 87-89|Homologene|InParanoid|OrthoInspector|OrthoMCL	IV-3J01		WBGene00001241	WBGene00001241	elo-3	D2024.3	avoids bacterial lawn, developmental delay postembryonic, egg laying defective, foraging behavior variant, growth variant, intestinal degeneration, lipid composition variant, oxygen consumption decreased, pale, reduced brood size, slow growth, thin, transgene expression reduced, transgene expression variant	N.A.	ire-1(Genetic), atf-6(Genetic)	body wall musculature, hypodermis, pharyngeal-intestinal valve, pharynx, rectal gland cell, reproductive system, tail, uterus	The elo-3 gene encodes a paralog of elo-1 and elo-2, each of which encodes a polyunsaturated fatty acid (PUFA) elongase\; ELO-3 may be required for normally rapid growth.	Is an ortholog of human ELOVL6 (ELOVL fatty acid elongase 6). Is predicted to have fatty acid elongase activity. Is expressed in tail.
WBGene00001242	elo-4	C40H1.4	ENSG00000170522	ELOVL6	2	Ensembl Compara 87-89|OrthoMCL	III-5A07		WBGene00001242	WBGene00001242	elo-4	C40H1.4	N.A.	N.A.	N.A.	N.A.	The elo-4 gene encodes a paralog of elo-1 and elo-2, each of which encodes a polyunsaturated fatty acid (PUFA) elongase\; its function in vivo is unknown.	Is an ortholog of human ELOVL3 (ELOVL fatty acid elongase 3) and ELOVL6 (ELOVL fatty acid elongase 6). Is predicted to have fatty acid elongase activity.
WBGene00001247	elo-9	Y53F4B.2	ENSG00000170522	ELOVL6	3	Ensembl Compara 87-89|OMA|OrthoInspector	II-9I08		WBGene00001247	WBGene00001247	elo-9	Y53F4B.2	N.A.	N.A.	N.A.	N.A.	The elo-9 gene encodes a paralog of elo-1 and elo-2, each of which encodes a polyunsaturated fatty acid (PUFA) elongase\; elo-9 has no known function in vivo.	Is an ortholog of human ELOVL3 (ELOVL fatty acid elongase 3) and ELOVL6 (ELOVL fatty acid elongase 6). Is predicted to have fatty acid elongase activity.
WBGene00001239	elo-1	F56H11.4	ENSG00000170522	ELOVL6	1	OrthoMCL	IV-4N24		WBGene00001239	WBGene00001239	elo-1	F56H11.4	anoxia hypersensitive, fat content increased, lipid composition variant	lipid composition variant	egl-9(Genetic), daf-2(Genetic), igdb-2(Physical), dlg-1(Physical), pid-3(Physical), lin-53(Physical)	anal depressor muscle, body wall musculature, hypodermis, intestine, mu_int_L, mu_int_R, pharynx, rectal gland cell	elo-1 encodes a component of C-18 polyunsaturated fatty acid (PUFA) elongase that is required for normal elongation of n-6 and n-3 20-carbon PUFA in vivo\; ELO-1 is a condensing enzyme that elongates n-6 and n-7 (and, with less efficiency, n-3) series C18 PUFAs.	Is an ortholog of human ELOVL3 (ELOVL fatty acid elongase 3) and ELOVL6 (ELOVL fatty acid elongase 6). Is predicted to have fatty acid elongase activity. Is involved in unsaturated fatty acid biosynthetic process.
WBGene00004077	pop-1	W10C8.2	ENSG00000138795	LEF1	3	Ensembl Compara 87-89|InParanoid|OrthoInspector	I-1K04		WBGene00004077	WBGene00004077	pop-1	W10C8.2	AB lineage variant, alae secretion variant, antibody staining variant, apoptosis reduced, asymmetric cell division variant, bivulva, body morphology variant, body muscle dystrophy, body wall muscle physiology variant, breaks in alae, cell cleavage delayed, cell differentiation variant, cell fate specification variant, cell fate transformation, cell membrane organization biogenesis variant, cell m…	B lineage variant, body morphology variant, cell fate transformation, cell fate transformation to endoderm, cell polarity variant, distal tip cell development variant, ectopic endoderm, ectopic expression transgene, egg laying defective, excess intestinal cells, extra linker cells, germline proliferation variant, gonad development variant, gonad morphology variant, L1 arrest, level of transgene e…	mom-2(Genetic), lit-1(Physical | Genetic | Regulatory), pry-1(Genetic), sys-1(Physical | Genetic | Regulatory), gon-14(Genetic), gon-15(Genetic), gon-16(Genetic), ceh-22(Genetic | Regulatory), cdc-25.1(Genetic), bar-1(Physical | Genetic), med-1(Genetic), tcl-2(Genetic | Regulatory), ceh-13(Regulatory), mom-4(Genetic | Regulatory), mab-5(Physical | Regulatory), end-1(Regulatory), let-7(Genetic), l…	ABplpapaaa, ABprpapaaa, dorsal nerve cord, gonad, head neuron, hyp7, hypodermis, intestine, oocyte, P7.pa, P7.pp, pharynx, QL, QR, seam cell, TL, TR, V4L.p, V4R.p, V5L.a nucleus, V5L.p, V5R.a nucleus, V5R.p, V6L.a nucleus, V6L.p, V6R.a nucleus, V6R.p, ventral nerve cord, vulA, vulB1, vulB2, vulC, vulD, vulE, vulF, vulva, Z1.p, Z4.a	pop-1 encodes an HMG box-containing protein that is the sole C. elegans member of the TCF\/LEF family of transcription factors\; in C. elegans, POP-1 functions as a component of the canonical and noncanonical Wnt signaling pathways that are required for cell migrations and binary cell fate decisions associated with asymmetric cell division, respectively\; in yeast two-hybrid assays, the POP-1 N-t…	Is an ortholog of human LEF1 (lymphoid enhancer binding factor 1)\; TCF7 (transcription factor 7)\; and TCF7L2 (transcription factor 7 like 2). Exhibits several functions, including RNA polymerase II transcription factor binding activity\; beta-catenin binding activity\; and enzyme binding activity. Is involved in several processes, including mesodermal cell fate commitment\; mitochondrial unfold…
WBGene00004091	pps-1	T14G10.1	ENSG00000138801	PAPSS1	4	Ensembl Compara 87-89|OMA|OrthoInspector|OrthoMCL	IV-9A15		WBGene00004091	WBGene00004091	pps-1	T14G10.1	shortened life span	lethal, sterile	N.A.	AMshL, AMshR, head neuron, hyp4, hyp6, hyp7 syncytium, intestine, nervous system, Pharyngeal gland cell, seam cell	pps-1 is orthologous to human PAPSS1 (OMIM:603262) and human PAPSS2 (OMIM:603005, mutated in spondyloepimetaphyseal dysplasia).	Is an ortholog of human PAPSS1 (3'-phosphoadenosine 5'-phosphosulfate synthase 1) and PAPSS2 (3'-phosphoadenosine 5'-phosphosulfate synthase 2). Exhibits adenylylsulfate kinase activity and sulfate adenylyltransferase (ATP) activity. Is involved in 3'-phosphoadenosine 5'-phosphosulfate biosynthetic process. Localizes to the nucleus. Is expressed in epithelial cell and pharyngeal gland cell. Human…
WBGene00004756	sec-24.2	ZC518.2	ENSG00000138802	SEC24B	6	Ensembl Compara 87-89|Homologene|InParanoid|OMA|OrthoInspector|OrthoMCL	IV-6H01		WBGene00004756	WBGene00004756	sec-24.2	ZC518.2	avoids bacterial lawn, body wall muscle myosin organization defective, cell secretion variant, dumpy, embryo osmotic integrity defective early emb, embryonic lethal, germ cell compartment expansion variant, germ cell compartment morphology variant, germ cell compartment size variant, germline nuclear positioning variant, larval lethal, locomotion variant, oocyte number decreased, oogenesis varian…	lethal, sterile	sec-23(Physical), ain-1(Physical), gld-1(Physical), sec-16A.1(Physical), zen-4(Physical), glh-1(Physical)	DA neuron	N.A.	Is an ortholog of human SEC24B (SEC24 homolog B, COPII coat complex component). Is predicted to have zinc ion binding activity. Is expressed in DA neuron.
WBGene00004892	sms-1	H21P03.3	ENSG00000164023	SGMS2	2	Ensembl Compara 87-89|OMA	IV-6K07		WBGene00004892	WBGene00004892	sms-1	H21P03.3	N.A.	N.A.	mpz-3(Physical)	body wall musculature, coelomocyte, head muscle, Pharyngeal gland cell, pharyngeal muscle cell, rectal muscle, spermatheca, ventral nerve cord, vulval muscle	N.A.	Is an ortholog of human SGMS2 (sphingomyelin synthase 2). Is predicted to have ceramide cholinephosphotransferase activity and sphingomyelin synthase activity. Is expressed in head muscle\; pharyngeal cell\; rectal muscle\; spermatheca\; and vulval muscle.
WBGene00004893	sms-2	F53H8.4	ENSG00000164023	SGMS2	1	Ensembl Compara 87-89	None		WBGene00004893	WBGene00004893	sms-2	F53H8.4	N.A.	N.A.	N.A.	N.A.	N.A.	Is an ortholog of human SGMS1 (sphingomyelin synthase 1) and SGMS2 (sphingomyelin synthase 2). Is predicted to have ceramide cholinephosphotransferase activity and sphingomyelin synthase activity.
WBGene00004894	sms-3	Y22D7AL.8	ENSG00000164023	SGMS2	1	Ensembl Compara 87-89	III-9C05		WBGene00004894	WBGene00004894	sms-3	Y22D7AL.8	N.A.	N.A.	hpl-2(Regulatory)	N.A.	N.A.	Is an ortholog of human SGMS1 (sphingomyelin synthase 1) and SGMS2 (sphingomyelin synthase 2). Is predicted to have ceramide cholinephosphotransferase activity and sphingomyelin synthase activity.
WBGene00021075	None	W07E6.3	ENSG00000164023	SGMS2	1	Ensembl Compara 87-89	II-1A20		WBGene00021075	WBGene00021075	sms-5	W07E6.3	N.A.	N.A.	N.A.	N.A.	N.A.	Is an ortholog of human SGMS1 (sphingomyelin synthase 1) and SGMS2 (sphingomyelin synthase 2). Is predicted to have ceramide cholinephosphotransferase activity and sphingomyelin synthase activity.
WBGene00006576	tkr-1	C38C10.1	ENSG00000169836	TACR3	3	Ensembl Compara 87-89|OMA|OrthoInspector	III-5A21|III-5C01		WBGene00006576	WBGene00006576	tkr-1	C38C10.1	cord commissures fail to reach target, fat content reduced	N.A.	N.A.	ADEsoL, ADEsoR, PDEsoL, PDEsoR	tkr-1 encodes a G protein-coupled receptor that is the C. elegans tachykinin-like neuropeptide receptor homolog\; by homology, TKR-1 is predicted to function in modulation of excitatory neurotransmission\; as loss of tkr-1 activity via RNAi results in moderate reduction of fat content, TKR-1 may play a specific role in regulating lipid metabolism\; a tkr-1 reporter gene fusion is reportedly expre…	Is an ortholog of human TACR1 (tachykinin receptor 1) and TACR3 (tachykinin receptor 3). Is predicted to have tachykinin receptor activity. Is expressed in ADEsoL\; ADEsoR\; PDEsoL\; and PDEsoR. Human ortholog(s) of this gene are implicated in hypogonadotropic hypogonadism 11 with or without anosmia.
WBGene00016761	tkr-2	C49A9.7	ENSG00000169836	TACR3	5	Ensembl Compara 87-89|Homologene|InParanoid|OMA|OrthoInspector	IV-3K17		WBGene00016761	WBGene00016761	tkr-2	C49A9.7	N.A.	N.A.	N.A.	N.A.	N.A.	Is an ortholog of human TACR1 (tachykinin receptor 1) and TACR3 (tachykinin receptor 3). Is predicted to have G protein-coupled receptor activity. Human ortholog(s) of this gene are implicated in hypogonadotropic hypogonadism 11 with or without anosmia.
WBGene00006766	unc-30	B0564.10	ENSG00000164093	PITX2	4	Ensembl Compara 87-89|InParanoid|OrthoInspector|OrthoMCL	IV-7A23		WBGene00006766	WBGene00006766	unc-30	B0564.10	locomotion variant, shrinker, transgene expression increased	amplitude of sinusoidal movement variant, antibody staining reduced, axon fasciculation variant, axon outgrowth variant, backing decreased, backward locomotion variant, backward point velocity decreased, body posture amplitude decreased, body posture wavelength decreased, coiling frequency increased, embryonic lethal, forward locomotion decreased, forward point velocity decreased, frequency body …	unc-25(Regulatory), unc-47(Regulatory), jnk-1(Genetic), unc-46(Regulatory), irx-1(Regulatory), nhr-10(Physical), unc-30(Physical), unc-30(Physical), egl-5(Physical), mab-5(Physical), dsc-1(Physical), die-1(Physical), ceh-43(Physical), ceh-37(Physical), mls-2(Physical), nhr-6(Physical), daf-3(Physical), nhr-111(Physical), lsy-2(Physical), lsl-1(Physical), ztf-11(Physical), ztf-1(Physical), ztf-26(…	ASGL, ASGR, DD neuron, GABAergic neuron, intestine, PVPL, PVPR, RID, RIH, VD neuron, ventral cord neuron	unc-30 encodes a homeodomain-containing protein that is orthologous to the Pitx family of homeodomain transcription factors\; during develpoment, UNC-30 controls the terminal differentiation of all 19 type D GABA-ergic motor neurons by directly regulating the expression of UNC-25\/GAD and UNC-47\/VGAT, which regulate GABA formation and secretion, respectively\; UNC-30 is expressed most strongly i…	Is an ortholog of human PITX1 (paired like homeodomain 1). Exhibits sequence-specific DNA binding activity. Is involved in neuron differentiation\; positive regulation of transcription by RNA polymerase II\; and regulation of locomotion. Localizes to the nucleus. Is expressed in intestine and neurons. Human ortholog(s) of this gene are implicated in clubfoot\; eye disease (multiple)\; and iridogo…
WBGene00008149	pyp-1	C47E12.4	ENSG00000138777	PPA2	4	Ensembl Compara 87-89|InParanoid|OrthoInspector|OrthoMCL	IV-5M21		WBGene00008149	WBGene00008149	pyp-1	C47E12.4	avoids bacterial lawn, distal tip cell migration variant, embryonic lethal, endomitotic oocytes, gonad displaced, larval arrest, larval lethal, late larval arrest, maternal sterile, no induction of antimicrobial peptide expression after infection, slow growth, sterile, transgene expression increased, transgene expression reduced	N.A.	hlh-29(Regulatory), mbk-2(Physical), hsp-70(Regulatory), ckb-2(Regulatory), hsp-16.2(Regulatory), smo-1(Physical), pid-3(Physical), lin-53(Physical), glh-1(Physical)	coelomocyte, intestine, neuron	pyp-1 encodes, by alternative splicing, three isoforms of an inorganic pyrophosphatase required for embryonic and larval viability, intestinal function, and distal tip cell migration\; PYP-1 is catalytically active in vitro, and is expressed in neurons, intestine, and coelomocytes\; PYP-1 is orthologous to Drosophila NURF-38, and to human PPA1 (OMIM:179030) and PPA2\; by orthology with NURF-38, P…	Is an ortholog of human PPA1 (inorganic pyrophosphatase 1) and PPA2 (inorganic pyrophosphatase 2). Is predicted to have inorganic diphosphatase activity. Is involved in innate immune response. Localizes to the neuron projection and vacuole. Is expressed in coelomocyte and neurons.
WBGene00008779	None	F14B4.1	ENSG00000138798	EGF	1	Ensembl Compara 87-89	I-4H09		WBGene00008779	WBGene00008779	F14B4.1	F14B4.1	N.A.	N.A.	swsn-2.2(Physical)	N.A.	N.A.	Is an ortholog of human EGF (epidermal growth factor) and LRP5L (LDL receptor related protein 5 like). Is predicted to have Wnt-activated receptor activity and Wnt-protein binding activity. Human ortholog(s) of this gene are implicated in renal hypomagnesemia 4.
WBGene00016352	tbck-1	C33F10.2	ENSG00000145348	TBCK	6	Ensembl Compara 87-89|Homologene|InParanoid|OMA|OrthoInspector|OrthoMCL	II-4C09		WBGene00016352	WBGene00016352	tbck-1	C33F10.2	N.A.	N.A.	N.A.	N.A.	tbck-1 encodes a TBC (Tre-2\/Bub2\/Cdc16) domain-containing protein kinase.	Is an ortholog of human TBCK (TBC1 domain containing kinase). Is predicted to have GTPase activator activity and Rab GTPase binding activity.
WBGene00019296	mcu-1	K02B2.3	ENSG00000005059	MCUB	3	Ensembl Compara 87-89|InParanoid|OrthoInspector	IV-3E21		WBGene00019296	WBGene00019296	mcu-1	K02B2.3	N.A.	N.A.	mcu-1(Physical), mcu-1(Physical), cfz-2(Physical), smo-1(Physical)	N.A.	N.A.	Is an ortholog of human MCU (mitochondrial calcium uniporter). Exhibits identical protein binding activity. Is involved in several processes, including calcium import into the mitochondrion\; mitochondrial calcium ion homeostasis\; and protein homooligomerization.
WBGene00020139	None	T01B11.2	ENSG00000164089	ETNPPL	5	Ensembl Compara 87-89|Homologene|InParanoid|OrthoInspector|OrthoMCL	IV-4E18		WBGene00020139	WBGene00020139	eppl-1	T01B11.2	embryonic lethal	N.A.	N.A.	ASEL, ASER, ASGL, ASGR, hypodermis, intestine, pharynx, PQR	N.A.	Is an ortholog of human ETNPPL (ethanolamine-phosphate phospho-lyase). Is predicted to have lyase activity\; pyridoxal phosphate binding activity\; and transaminase activity.
WBGene00022046	None	Y66H1A.4	ENSG00000109534	GAR1	5	Ensembl Compara 87-89|InParanoid|OMA|OrthoInspector|OrthoMCL	IV-1K17		WBGene00022046	WBGene00022046	Y66H1A.4	Y66H1A.4	blistered, chemical hypersensitive, cytoplasmic processing body variant, gamma ray induced apoptosis decreased, mRNA surveillance defective, nonsense mRNA accumulation, organism hypersensitive ionizing radiation, patchy coloration, pattern of transgene expression variant, radiation induced germ cell apoptosis resistant, receptor mediated endocytosis defective, reduced brood size, slow growth, ste…	lethal, sterile	ain-1(Physical), sip-1(Physical), rde-10(Physical), pid-3(Physical), glh-1(Physical)	N.A.	N.A.	Is an ortholog of human GAR1 (GAR1 ribonucleoprotein). Is predicted to have box H\/ACA snoRNA binding activity.
WBGene00044989	None	Y37A1B.17	ENSG00000236699	ARHGEF38	1	Ensembl Compara 87-89	IV-7K22|IV-7K24		WBGene00044989	WBGene00044989	Y37A1B.17	Y37A1B.17	aldicarb resistant, locomotion variant	N.A.	vav-1(Physical), C05D10.4(Physical), C09G1.4(Physical), C49H3.6(Physical), csn-5(Physical), cfim-2(Physical), dylt-1(Physical), dyn-1(Physical), ehs-1(Physical), F10D11.2(Physical), F10D7.5(Physical), F10E9.3(Physical), F22E12.1(Physical), hpo-34(Physical), F34D10.4(Physical), ifo-1(Physical), F56D3.1(Physical), F59E12.9(Physical), figl-1(Physical), fum-1(Physical), xnd-1(Physical), hlh-1(Physica…	N.A.	N.A.	Is an ortholog of human DNMBP (dynamin binding protein). Is predicted to have Rho guanyl-nucleotide exchange factor activity.
WBGene00004448	rpl-34	C42C1.14	ENSG00000109475	RPL34	4	InParanoid|OMA|OrthoInspector|OrthoMCL	IV-6D13		WBGene00004448	WBGene00004448	rpl-34	C42C1.14	avoids bacterial lawn, cytoplasmic processing body variant, embryonic lethal, extended life span, larval arrest, no induction of antimicrobial peptide expression after infection, paraquat resistant, patchy coloration, pleiotropic defects severe early emb, slow growth, sterile, transgene subcellular localization variant	lethal, sterile	dhc-1(Genetic), rpl-30(Physical), rpl-7A(Physical), hrde-1(Physical), cey-4(Physical), cdc-42(Physical), dlg-1(Physical), let-413(Physical), lgl-1(Physical), sip-1(Physical), usip-1(Physical), sart-3(Physical), tofu-6(Physical), pid-3(Physical), nmad-1(Physical), glh-1(Physical)	anal depressor muscle, anterior distal tip cell, body wall musculature, coelomocyte, excretory cell, gonadal sheath cell, head neuron, hypodermis, intestine, mu_int_L, mu_int_R, nerve ring, nervous system, neuron, Pharyngeal gland cell, pharynx, posterior distal tip cell, rectal epithelium, reproductive system, spermatheca, tail neuron, uterine muscle, uterus, vulva, vulval muscle	rpl-34 encodes a putative large ribosomal subunit L34 protein that inhibits DHC-1 in vivo\; RPL-34 is expressed in most somatic tissues of larvae and adults\; in mass RNAi assays, RPL-34 is required for embryonic and larval development, normally rapid growth, and normal body coloration.	Is an ortholog of human RPL34 (ribosomal protein L34). Is predicted to be a structural constituent of ribosome.
WBGene00006624	try-6	F48A9.3	ENSG00000205403	CFI	1	InParanoid	I-3O13		WBGene00006624	WBGene00006624	try-6	F48A9.3	N.A.	N.A.	N.A.	N.A.	N.A.	Is an ortholog of human TMPRSS13 (transmembrane serine protease 13) and TMPRSS2 (transmembrane serine protease 2). Is predicted to have serine-type endopeptidase activity.
WBGene00006625	try-7	ZC581.6	ENSG00000205403	CFI	1	InParanoid	I-3A18		WBGene00006625	WBGene00006625	try-7	ZC581.6	N.A.	N.A.	N.A.	N.A.	N.A.	Is an ortholog of human TMPRSS13 (transmembrane serine protease 13) and TMPRSS2 (transmembrane serine protease 2). Is predicted to have serine-type endopeptidase activity.
WBGene00017791	try-8	F25E5.10	ENSG00000205403	CFI	1	InParanoid	V-5M02		WBGene00017791	WBGene00017791	try-8	F25E5.10	N.A.	N.A.	N.A.	N.A.	N.A.	Is an ortholog of human TMPRSS13 (transmembrane serine protease 13) and TMPRSS2 (transmembrane serine protease 2). Is predicted to have serine-type endopeptidase activity.
WBGene00020655	None	T21E12.3	ENSG00000205403	CFI	1	InParanoid	I-1P02		WBGene00020655	WBGene00020655	T21E12.3	T21E12.3	chemical response variant, lethal, presynaptic region physiology variant	N.A.	N.A.	N.A.	N.A.	Is an ortholog of human TMPRSS13 (transmembrane serine protease 13) and TMPRSS2 (transmembrane serine protease 2). Is predicted to have serine-type endopeptidase activity.
WBGene00009865	None	F49B2.6	ENSG00000138792	ENPEP	1	OrthoInspector	I-7M11|I-7M13		WBGene00009865	WBGene00009865	F49B2.6	F49B2.6	embryonic lethal, locomotion variant, organism morphology variant, slow growth	N.A.	N.A.	N.A.	N.A.	Is an ortholog of human ERAP1 (endoplasmic reticulum aminopeptidase 1) and LNPEP (leucyl and cystinyl aminopeptidase). Is predicted to have metalloaminopeptidase activity\; peptide binding activity\; and zinc ion binding activity.
WBGene00011587	None	T07F10.1	ENSG00000138792	ENPEP	2	OrthoInspector|OrthoMCL	V-8H09		WBGene00011587	WBGene00011587	anp-1	T07F10.1	N.A.	N.A.	N.A.	excretory cell, intestine, nervous system, pharynx, tail neuron	N.A.	Is an ortholog of human ERAP1 (endoplasmic reticulum aminopeptidase 1) and ERAP2 (endoplasmic reticulum aminopeptidase 2). Is predicted to have metalloaminopeptidase activity\; peptide binding activity\; and zinc ion binding activity.
WBGene00001240	elo-2	F11E6.5	ENSG00000170522	ELOVL6	0	Legacy Ortholist	IV-8I10		WBGene00001240	WBGene00001240	elo-2	F11E6.5	egg laying variant, embryonic lethal, extended life span, fat content reduced, fewer eggs laid, growth variant, lipid composition variant, mRNA levels increased, mRNA levels reduced, no induction of antimicrobial peptide expression after infection, pale, pathogen susceptibility increased, peptide uptake by intestinal cell decreased, posterior body wall contraction defective, reduced brood size, r…	N.A.	acs-2(Regulatory), ech-1.1(Regulatory), fasn-1(Regulatory), sod-3(Regulatory), sbp-1(Regulatory), nhr-49(Regulatory)	intestine, pharyngeal muscle cell, tail, uterus, ventral nerve cord	elo-2 encodes a palmitic acid elongase, homologous to polyunsaturated fatty acid (PUFA) elongases such as ELO-1, that is required for normally rapid growth, normally large body size, fertility, and for the quantitative regulation of the ultradian defecation rhythm\; the joint action of ELO-2 with ELO-1 is strongly required for 20-carbon PUFA production and for general viability\; loss of el-2 act…	Is an ortholog of human ELOVL3 (ELOVL fatty acid elongase 3) and ELOVL6 (ELOVL fatty acid elongase 6). Is predicted to have fatty acid elongase activity. Is involved in several processes, including determination of adult lifespan\; growth\; and lipid metabolic process. Is expressed in intestine\; pharyngeal muscle cell\; tail\; uterus\; and ventral nerve cord.
Red: show lifespan variants in CE
Blue have longevity snps in humans, but not tested in Ce
